# Supplementary material for: Antiproliferative, Antiangiogenic, and Antimetastatic Therapy Response by Mangiferin in a Syngeneic Immunocompetent Colorectal Cancer Mouse Model Involves Changes in Mitochondrial Energy Metabolism
Source: Front Pharmacol. 2021 Dec 3;12:670167. doi: 10.3389/fphar.2021.670167 (PMC8678272; doi:10.3389/fphar.2021.670167)
Supplement: Supplementary file 4 [file Table3.XLSX]

## Sheet: Input_genelist
TUMOR (MGF 100mg)	METAST (MGF 50mg)
NA	Spon2
Acin1	Cyp2f2
NA	Retnla
Arl4a	Chia1
NA	Ccnd2
NA	Hpx
C330018D20Rik	Dpysl3
Tmem242	Cpm
NA	Hsph1
Pogk	Zbtb7a
Gstz1	Saa1
Ensa	Hc
Zfp787	Enpp4
NA	NA
Prpf8	Casz1
NA	NA
NA	NA
NA	Rrp1b
Csf1	Itgb6
Alg5	Ezh2
NA	Atp8a1
NA	Tmem100
NA	Slc26a4
NA	Cyp2b10
Ffar3	NA
NA	Irx3
Piezo1	Eif5
NA	Slc4a7
Mff	Tmem2
Plec	Lrat
NA	Sox4
Cgrrf1	Ddx6
NA	Eif5
Klrb1a	2610005L07Rik
Rgma	Cldn5
NA	E2f2
NA	Ptp4a2
Atg101	Map1b
Ireb2	Papola
Wbp1l	Wapl
NA	Golga2
NA	Pvalb
Ankrd10	Ankrd11
NA	Pdpk1
NA	NA
Herc2	Irs2
NA	Pkp4
NA	Clock
Rhobtb1	Lmnb2
Smo	Nfatc3
Mrpl48	Hpx
NA	Chd1
NA	NA
Golga1	Hist1h2ah
NA	Suz12
Myo5a	Veph1
Pogk	Ubr4
Qdpr	G3bp2
NA	2810474O19Rik
NA	Lamp3
Iqgap1	Thsd4
NA	Myo5c
Map1b	Hist1h2ak
Dusp2	Mgea5
Dusp2	Hist2h2ac
Nup214	Chia1
NA	NA
Rab8b	NA
NA	Cxcl15
NA	Hsp90aa1
Elovl1	Glg1
Paqr9	Scgb3a2
Adar	Chd1
Stx8	Lgi3
Taf1d	Sec14l3
NA	6430548M08Rik
4631423B10Rik	Hmgcs1
Pds5a	NA
Nipbl	Unc5b
NA	Alcam
Hdhd2	Liph
Nab1	NA
Tpt1	Sec14l3
NA	H13
Crls1	NA
Ergic3	Ahdc1
Ttc3	Zfp326
Pcdhgc4	Nrcam
Arid2	Zc3h13
Sh3pxd2a	Vgll4
Alms1	Il6ra
NA	NA
Dram2	Edn1
NA	Emp2
Arhgap21	Polr1a
NA	NA
NA	Sec14l3
Insr	Hist1h2af
Ppnr	Hist1h2an
NA	Ankhd1
Etfb	Mllt3
NA	Itgb6
H2afy	Rrp1b
8430408G22Rik	Rnf6
Gemin6	Tbc1d20
Pds5b	Rbm28
NA	NA
NA	Clec7a
Vars	Ccser2
NA	Ddx46
NA	Inmt
Rrbp1	Wwc1
NA	NA
NA	Matn4
Pink1	Sftpb
Dst	Dag1
NA	Thoc2
NA	Eln
Mrpl48	NA
Sgk3	NA
Hook3	Gsk3b
Golgb1	Dag1
NA	Mapt
Tpt1	Nfic
Atp11a	Eef2
Coq10b	Synm
Fat1	Esm1
Cdc42bpb	NA
Col8a1	Scgb1a1
Flna	NA
Cyb5r3	Sptbn1
Cherp	Rbpjl
NA	Hsd17b7
NA	Lamp3
Gse1	Rtkn2
Bloc1s4	NA
NA	NA
Hspb8	Hopx
Eef1a1	G3bp2
Mrps31	Tead1
Ahctf1	Daam1
Twsg1	NA
NA	Irx5
Gapvd1	Hist1h2af
Ecsit	NA
Timp2	Srsf7
NA	Smad6
Ppm1d	Calr
Car5b	Ptgs1
NA	Zmiz1
Plekha5	Hspa8
Isca1	NA
NA	Cadps2
Dap3	Tns1
NA	NA
NA	Pdap1
Tcof1	Rnase2a
S100a1	Zfp326
Immp2l	Srsf3
NA	Ager
NA	Ranbp1
NA	Eif4ebp2
Ski	NA
Pou2f1	Smarca5-ps
Dctn3	Lrp2
Hmox1	Fam20b
Rabgap1	NA
March2	Slc6a2
Slc29a1	Trim56
Nipbl	Nav1
Scrib	Usp37
Slc9a8	Hist1h2ai
Dicer1	Grb7
NA	Orm2
Ubc	Ddx21
Soga1	Bach1
NA	Trio
NA	6820431F20Rik
Pacsin2	Nipbl
Chpt1	Fam222b
Atp11a	NA
Fbxo41	Rasa1
NA	Gjb6
Pdgfrb	Anxa3
Helz2	Cx3cr1
NA	Ank3
Ppp3r1	Appbp2
NA	Krt23
A230046K03Rik	Ccnd2
NA	Phf20l1
Lamc1	Aqp5
Zfp365	NA
H2-K1	Ddx27
Ankrd10	Heatr1
NA	Cdc25a
Proser1	Eef2
Fam178a	Plxna2
NA	Ccl12
NA	Clic4
Zgrf1	Brd2
NA	Slc9a3r2
Tardbp	Nectin3
Tpr	Chac1
Pbrm1	Kcnq1ot1
Ubc	Mak16
Use1	Inmt
Plxnb2	NA
Tspan17	Hic1
Nipsnap3b	Ccdc86
Thg1l	Zfp292
Micall2	Slc38a5
NA	Sertad2
NA	Sftpa1
Snai2	Syne1
Ino80c	Ddx24
Irak1	Nav1
Sumo1	Srm
Atm	Ildr2
NA	Prkrir
Zfp560	Fga
R3hdm1	Eprs
Scp2	Mtcl1
NA	D030056L22Rik
Ndufb3	Epn2
Ubr5	Actb
NA	Arhgap44
Igf1r	Smc1a
NA	Arhgap22
Mtch2	NA
Kmt5a	Fcrls
Mtpn	NA
Aco2	Ripply3
Srp14	Ccl12
Vps16	Dpp4
Hsp90b1	Pcdh17
NA	Mtap
Atraid	Ptprd
NA	NA
Cpsf1	Luc7l3
2011-09-01	Pik3r1
NA	Gspt1
Pou2f1	Clic3
NA	Arntl
Zmat3	Aox3
NA	Gkap1
Phactr4	Scnn1b
Man2a1	Wdr45b
Triobp	Efnb1
Hadhb	Ttll3
NA	5730455P16Rik
Iqgap1	NA
Plec	Tmem201
Nfic	NA
Usp33	Ptgs1
Polr2h	E2f2
Cit	Fcrls
Ndufs4	Acer2
Chpt1	Kdm6a
Il1rn	Rapgef5
NA	Itgb6
Zdhhc21	Tcof1
Zfhx3	Slx4
Fbln2	Igf2bp2
Ap4s1	Wdr75
Nisch	Mat1a
Prrc2a	Lsm12
Nav1	Asap2
NA	Matr3
Tmem204	Kmt2e
NA	NA
Cyb5r3	Acsl5
NA	Dhx32
Cramp1l	Wwtr1
NA	Myzap
Aak1	Cacna2d1
NA	Tmem184a
NA	Tes
NA	Creb3l2
Fnip1	NA
Rreb1	Sox7
Prune2	Ccnd1
Kmt2a	NA
NA	Zmynd8
Rilpl2	Crtc3
Tmem9b	Zdhhc21
Trps1	Rpp14
NA	Wfdc2
Atp5g2	Ercc5
Soga1	Nop58
Tnrc6c	Ccnb1
NA	Scnn1g
Plekhf1	Pcolce2
Lsm8	Zfp131
Snta1	Gata6
NA	Hist1h2ah
NA	Cyp51
Echs1	Lzts2
Grpel1	Zfhx3
Cox7a1	Cbx3
NA	NA
Crls1	Elovl5
Sema5a	NA
NA	Sqle
Helz2	Rbfox2
Chd4	Rcor1
NA	Zmynd8
Pdia3	NA
NA	Bcl11b
Etfb	Limch1
Hddc2	Cmpk2
Luzp1	Skp2
Pdhb	Stat3
Plekha5	Clec7a
Pqlc3	Hsp90ab1
Dab2ip	Scn3a
Rab1b	Ruvbl1
Snx27	Abca3
NA	Il18r1
Ndufv3	Akap2
Zzef1	Fga
Chpt1	Ces1d
Olig1	Rgl1
NA	Hist2h2ab
Ipo4	Myo10
Ccnl1	Sftpd
NA	Sox7
Tnrc6a	Gnl3
Ahctf1	Tgs1
Prkcsh	NA
Hbb-bt	Napsa
Rida	Hn1l
H13	Ube2o
Csrp2	Vasn
Lyz1	Hn1
Ccnyl1	Akap5
Agrn	NA
Dnajc15	Pkn2
Samd9l	NA
NA	Cbfb
NA	Amigo2
Atm	Napsa
Mrpl12	Cxcl10
Idh3g	Tfrc
9130004J05Rik	Psmd7
Scp2	Wars2
Slc25a1	Vma21
Brd4	Sp5
Ly6e	Pip5k1a
Smg1	Armc8
Slc25a20	Erlin1
Cep170b	Pcgf6
NA	Poc1b
Fus	Rhod
Zdhhc21	Cnot6
Ino80d	Prrx1
Dido1	NA
NA	NA
NA	NA
NA	Nipbl
Hspg2	Wwp1
Hmgb1	Col23a1
NA	Gfod1
Col6a3	Cbr2
Osmr	Serbp1
NA	Uba5
Kif23	Vegfa
NA	Trim2
Ptprs	NA
NA	Pja2
Flii	Lrrfip1
Trp53inp2	Kcnk1
Macrod1	NA
Nav1	Map2
NA	Rsad2
Tead1	Tfcp2l1
NA	Ccnc
Mlec	Celf1
NA	Rab12
Mx2	Ggcx
NA	Phxr4
Ppm1d	Col4a3
Fahd2a	Vcp
Ptpre	NA
Tsc2	Anxa3
NA	Wnk1
Srrm2	Eif4h
Ky	Bik
NA	Tmprss2
NA	Galnt1
Gm8213	Ankrd12
Spata24	Tbl1x
Srp9	Apoa1
Rhod	Galnt1
NA	Kif23
Trim26	Khdrbs1
NA	Plpp3
Aaed1	Srsf2
Isca1	Mdn1
Slit2	Aqp5
Psme2	Flrt2
Ahnak	Gatad2b
NA	Git2
Mtch1	NA
NA	Atm
Pcca	NA
NA	Ptgis
Letmd1	Kif2c
Cbr4	Syne2
Aamdc	Wwc1
Fbln2	Ppp1r12a
NA	Wwtr1
Rims2	Eef2
Arl6ip4	Prc1
NA	Flrt3
D030029J20Rik	Muc1
Mpc2	Hsp90ab1
Sgk1	NA
Cox7b	Clec1a
Ky	Celf1
Dvl1	Ptprf
Snca	Eif3d
NA	Atp6v0a2
Maml2	Cd44
Sdhaf3	NA
Avpi1	NA
Slc25a19	NA
NA	Lpin2
Akap9	Acbd3
NA	Ace
Ahnak	Nr2f2
Dab2	Wars
Hint2	Ccdc92
Lmnb1	Ppm1l
NA	Srpk1
Emilin2	Amotl1
Srrm2	Tle4
2015-09-01	Armt1
Dlg5	Usp48
Upf1	Srsf3
NA	Ecd
Mmp13	Spcs3
Iffo2	Large2
Kmt2c	Enc1
NA	Smad3
Megf8	Nfic
Pacs2	Hoxa5
NA	Zfp318
Dhrs7	Atxn2
Myh9	Cxadr
Mapk6	Sgol1
NA	Ppig
Rai14	Dapk2
Nab1	NA
Crat	Rabl6
NA	Mkln1
Mxd4	Tmem63b
Prrc2b	Sh3tc2
NA	Tes
NA	2310007B03Rik
NA	Slc39a8
March2	Ubc
Bbx	Khdrbs1
NA	Nusap1
Acaa2	Exoc4
Ldhb	NA
NA	Phc2
Ndufs2	NA
Gemin6	Cdca8
Acaa2	Cdh16
NA	Cx3cl1
NA	Eme1
Zfp692	Ccnd1
Med30	Kif23
Wnk1	Snx30
1810009A15Rik	Igfbp2
Zc3h7a	Zc2hc1a
Kif1b	Cenpt
NA	Rnf216
Mdn1	NA
Gpsm1	Gap43
Bcl2l1	Stard4
Crebbp	Cdc20
Emsy	Cbx3
Cep170	Mon2
NA	Plekhb1
NA	NA
Mrps11	Cdca2
NA	Sftpb
Zfhx3	Ttc14
NA	Muc1
Ubc	Zc3h13
Synpo	Sppl2a
Ccdc92	Lima1
Safb	Prkacb
Hes1	Skil
NA	Abhd17c
Ankrd11	Itga3
Celf2	Ldah
NA	Chd2
NA	Pvr
Cryz	Nedd4l
Kcnq1ot1	Nop56
Ahnak	Pak4
D10Jhu81e	Unc13b
Mrpl11	Bach2
NA	NA
Ndufs6	Slc1a4
Eef1akmt1	Nsf
Nudt7	NA
Ttll3	Ckap2
Plekhf1	Mef2c
Ep400	Vimp
Pfdn4	Tuft1
Ddit4	Tinag
Adh5	Gtse1
Polr2h	Irf1
Pdgfra	Zmynd11
Fndc3b	Nemf
Ipo9	Napsa
Paox	Pgp
Apex1	Arap2
Zbtb8os	Mcm4
Ttc28	Noa1
Pank1	Llgl2
NA	Plk1
Tmem120b	Tex261
Idh3a	NA
Cad	Cldn3
Brwd1	Raver2
Pigp	Luc7l
Cript	Uso1
Arl4d	Hnrnpk
Snx27	Cntnap4
Cmtm4	Kras
Nudt21	NA
Acaa2	Mpp5
Hint3	NA
Gpihbp1	NA
Acaa2	Zbtb17
Kirrel	Tdrd7
Ndufs2	Fkbp4
Eme1	Cpsf7
Rpl31	B3galnt2
Lars	Fdps
NA	Trib3
Atp5l	Kmt5a
NA	Kif22
Gm4997	Ppp2r5e
Agpat2	Zfp131
4930518I15Rik	Cmtm8
Mt2	Sema4b
Pfdn4	Hoxc6
Col18a1	Smarcad1
Paox	Pgap2
Mgll	Chpt1
NA	Mmp23
Slc2a4	Fcgr2b
Zcchc7	Rpl31
Proser1	Fndc5
Inhba	Serpinb1a
Trio	NA
Acvr2b	Gadd45b
Foxj3	Lamtor2
Gchfr	Pira1
Znrd1	Aff1
Atp5a1	NA
Uqcrb	Arpc1b
Mfhas1	Ndufv3
Rsl24d1	Fcna
NA	Acp2
Ndufb5	Ccdc53
Cox7a2l	Otx1
Cib2	Dst
Tcf4	NA
Mcee	Serping1
S100a4	Nlrx1
Mgmt	Etfa
Acss2	Hspg2
Amotl1	Dbp
Slc39a14	Fam213b
Plekhm2	Fmod
NA	Lgals4
Hint3	Htr2b
Nfib	Il1a
NA	Gpnmb
Glg1	Lrrc23
Taf1d	H2-T23
Dbi	Pxmp2
Bcl2l11	NA
Triobp	Alox5
Plp2	Pfkl
Rnf216	Rhog
Arglu1	Htatip2
Cmip	Chd3
H2-K1	Ctdsp1
Tmem2	NA
Atp5h	Neu1
Tns3	Aifm2
NA	NA
Sptbn1	Tomm7
Adamtsl3	Bloc1s1
Sema5a	Pdxk
NA	Camta1
Cpt2	Pfkm
Pex16	Igsf1
1700029P11Rik	Ccdc33
NA	Tmem63a
Rin1	Lrrc51
Dcxr	Mpo
Trim8	Svep1
Ube2o	NA
Tmem38b	Dmkn
Cfap69	NA
NA	Tfpi
Trrap	Il1rn
Ndufb9	Rdh14
Sumo1	Nrg4
Rps27a	Fam3a
Gpd1	NA
Ankrd11	Zswim7
Emp3	Fgr
Fam195a	Gpd1
Parp14	Abcd1
Oscp1	Slc31a2
Map1lc3a	Chad
App	Il15ra
Ap1ar	Rcsd1
NA	Clk4
Rplp0	NA
NA	Timm8b
NA	Nsa2
NA	Inafm1
Slc4a1	Hmgcl
Eci1	Abca8a
Lyrm5	Itga5
NA	Mlf1
Ddr2	NA
Ltbp4	Abcg1
Plat	Tnfrsf21
Ppp1ca	Oxld1
Pdpk1	A730063M14Rik
Etfdh	Agap3
Mea1	Pla1a
Ugcg	Vamp8
Mras	Cyth1
NA	Osm
Ncor1	Per3
Tardbp	Slc46a3
Spata24	Ndufb9
Deb1	Pigyl
Map6	Havcr2
Ltbp4	Mpc2
Tmem9b	Gns
NA	Nbl1
Nfib	Borcs8
Glrx3	Gm4788
Arid1a	Nfe2
Col4a2	Hal
AU020206	Fndc5
Tsc22d3	Inpp5d
NA	Ndufa1
Cdkn1c	Cyb5a
Cib2	H2-D1
Snca	Fam65b
Inf2	Coro1a
Mgst1	Msr1
NA	Cryab
Pou5f2	Tnfaip3
NA	Mpo
NA	Rnf168
NA	Parvg
NA	Marcksl1
Col4a1	Ak1
Gstk1	Arg2
Setd5	Aldoc
Zmym6	Bud31
Adk	Cd59b
Ubr4	Hsd17b12
Zcchc7	Macrod1
NA	NA
Ucp1	Bex4
Pebp1	Ccl9
Mrap	Cotl1
Tgfbr3	Txnip
Kdm6b	Sod2
Pygl	Lgals4
Spop	Gsta4
Cdca3	Pdgfrl
NA	Aldh3b1
Rtkn2	Smim12
Khk	Nid2
Nuak2	Dpep2
Sprr2d	NA
NA	Adssl1
Dusp11	NA
5830428M24Rik	NA
Nudt19	NA
Ogt	Ykt6
Tlcd1	Lyrm5
NA	Jund
Gpatch8	Nop10
Kng2	Apoe
Ube2l6	Fbxo32
Casc3	Kcna6
NA	Slc25a1
Uxt	Haghl
Itpr3	Map1lc3b
Dbi	NA
Eif4a2	Arrdc4
Tpcn1	NA
Slc6a8	Fas
Tshz1	NA
Dync2li1	Acadm
Crebbp	Atp6v1d
Adig	Pgk1
Scaf1	Klrd1
Sncg	Vat1
Ankhd1	Pcp4l1
Upf1	Rpl3l
Gngt2	Pilra
NA	Coq10a
Tomm40l	NA
Efna5	Htra3
Mrpl55	Cpxm1
Gstk1	Lrmp
Ndst1	Ms4a6d
Trappc1	Clec4b1
Eno1b	NA
NA	Nid1
Nup210	Phyhd1
Ndufb6	Ppcdc
Sphk1	Flna
Sepp1	Cdkn2c
Aebp1	Fndc10
Cisd1	Mcemp1
Man2a2	Rpl27a
Cmip	Ndufaf1
Cntrl	NA
Gngt2	Zfp512
Pam16	Ndufb3
Pcdh19	NA
Vamp8	Aldoa
Rcor1	NA
Gchfr	Ndrg1
Nphp4	Myom1
Usmg5	Col18a1
Acadm	Cd14
Skp1a	Mxd1
Agap1	NA
Ak3	Selp
Suclg1	NA
Dhrs7b	Ykt6
Cidea	NA
Msi2	Sult1a1
Mgst1	Gstm5
Usp48	Mocos
Ankhd1	NA
NA	Copg1
Bscl2	Etfdh
Scaf4	Tagln
Arxes2	Scara5
Cd59a	Itga11
NA	Hdac5
Zmiz1	1700024G13Rik
Rpl39l	Col1a1
Creb5	Dbi
NA	Scnm1
NA	Pdlim4
Pparg	Pink1
Nfix	Zfp467
NA	Tango2
NA	NA
Gng5	Csrnp1
Avpi1	Esrra
Lpp	Pigs
Tmem45b	Mmp2
Zc3h7a	NA
Nipbl	Acadvl
Mki67	Acadvl
Mast3	Dedd2
NA	Ctss
Mrps18c	Epb41l3
Cxcl2	Col3a1
Smim4	Mmrn2
NA	Cnrip1
Timm8b	Pfkm
Hspg2	NA
NA	NA
S100a16	Trappc6b
Churc1	Pigp
Mtx3	Trem2
Asna1	NA
Rrp1b	NA
St3gal6	NA
NA	Riiad1
NA	Tm6sf1
1110059E24Rik	Cd53
Cenpf	Lcn2
Atp2b1	NA
Med21	Pnpla2
Zmynd8	NA
Hcar2	Uqcrh
0610007P14Rik	Tkt
Slc38a2	Mgst1
Fam102b	Coro1a
NA	Itm2a
Kmt2d	Cd52
H2-T22	NA
Lmtk2	Cebpb
Ndufc1	Klc4
NA	Egln3
NA	Atp5l
Cd47	Nfkbia
Cklf	Hilpda
Sp110	Ubtf
NA	Fmo3
Coa4	2010320M18Rik
Gtf2i	Ppp1r3b
Saysd1	Cox6b1
NA	Flnc
Acadvl	Hist1h1c
Pnpla2	Elovl6
NA	NA
Rictor	NA
1810032O08Rik	Ccl5
Ifit2	Rassf2
Rbp7	Esd
AA467197	Ndufa6
Spef1	Mmp13
Pet100	Aco2
Cpt2	Pstpip1
Slc27a2	Ffar3
Mgst3	Gstt1
Mgst3	Acaa1b
Pdxp	Sirpa
Nfix	Wfdc21
NA	Art3
Zeb2	Dkk3
Dhrs7b	Hmgb1
Fn1	Dcn
NA	Gdf10
Mea1	Slc10a6
NA	Myh8
Sdhb	Smoc1
Foxj3	C430049B03Rik
Myo5b	Serping1
Apobec1	Atp2a1
NA	Tuba1a
Eif3a	NA
Fam71f2	Amdhd2
Ccdc53	Neat1
Gm5150	Smpdl3a
Tkt	Cyr61
Akap2	Eci2
Fam195a	Lst1
Unc5b	NA
Sestd1	NA
NA	Uqcrb
Phf20	Aif1
Cox20	NA
Acadvl	Mmp3
Tenm4	Alox5ap
Tmem63b	Emilin2
Cuta	Hnrnpul2
Nfkbiz	Il7r
Snapc4	Acaa2
Hdac4	NA
Rasl12	Ascc1
NA	NA
Ecm1	Ift172
Mark2	Thy1
Cp	NA
NA	Acadl
Srrt	Actc1
Fmo1	Hp
P2rx5	NA
NA	Rac2
Bcl9l	Mefv
Spata24	Cd300lf
Myo10	Cd3e
Pdhb	Lgals1
NA	Pmm1
Tenm4	Mt1
Ch25h	Hspb1
Tnrc6a	Acaa2
Fam229b	Orm1
Mgea5	Ncstn
NA	Syngr1
Ndufb6	Tnf
Gm5617	Klhl41
Flnb	NA
Ccl2	Krt17
Ak3	Cpt2
NA	NA
Mmp9	Hist1h1c
0610030E20Rik	Sult1d1
Cd83	Ciart
Ubl4a	Ccdc12
Cryl1	Fam65b
Col20a1	Tmem218
NA	NA
Sncg	Fyb
Nfic	NA
Zmynd8	NA
Cyp27a1	Klhl6
Hbb-b2	Cirbp
Chd7	Pde1b
Clasrp	Gpx4
Slirp	Klhdc3
Ankrd11	Alox5ap
NA	Aldh3b1
Atxn2	H19
NA	Hspb6
Zfp512b	Samsn1
Ccdc53	Moxd1
Tcf25	Acta2
Phxr4	Cd33
Cd33	Sdhaf1
NA	Irak3
Nfic	NA
NA	Il1rn
Dst	Fstl1
Mlf2	Fos
Pprc1	NA
Pnpla3	Cry2
Flnb	Prok2
Pkig	Mrap
Eps15l1	Myl12b
Ndufb10	NA
Gm5069	1700001C02Rik
NA	Acacb
Rbp2	Dpep2
Wnk1	Lyz1
NA	Dhrs7
Sepp1	Slc22a1
NA	Fndc5
Trio	Inpp5k
Ndufc1	Ndufs4
Syngr1	Dnah8
Mast4	Mustn1
Gpi1	NA
Cdc7	Hdc
Nfix	Col12a1
Rasa1	NA
Rsad2	Kif1a
Amotl1	Rbm20
Med31	Dgat1
Ankhd1	Rps3a1
Mdm2	Ndufs4
NA	Arl4a
Gaa	Srgn
Sec61a2	Prg4
Ciart	NA
NA	Calm2
1700088E04Rik	Vpreb3
NA	Acta1
Atxn2	NA
Dnm3os	Tnnt1
Sdhaf1	Ifi27l2a
Nfic	1810022K09Rik
Uxt	NA
NA	Cd163l1
Mrps11	Cd59a
Smagp	Ccl6
Smim8	Des
Gna13	Tnfaip8l2
Foxp1	Gm4832
Clip2	Htra1
Scara5	Msrb1
NA	Mrgpra7
Mien1	Nudt7
NA	Ppbp
B9d1	Glipr1
Tctex1d2	NA
Zfc3h1	Slc2a3
Micall1	Csf2rb2
NA	NA
Rbms1	Thbs2
Rbms1	Cbr1
Slc24a3	NA
Zmynd8	Pygl
Syne2	Dennd1c
Rpl22l1	Csf3r
2310009A05Rik	NA
Ccl4	2310001H17Rik
NA	Klra17
Cav2	Slc25a20
Hist1h4h	NA
Egln3	S100a8
NA	NA
Gatad2b	NA
Ppig	Mmp10
Ccl4	Txn1
Saraf	Hcst
Gpr171	Entpd2
NA	Il16
Lgals7	Cyb5a
Rrp1b	Msrb1
Nudt8	Nfkbia
NA	Tmem159
Alas2	Fcgr4
Tef	Prdx5
Grn	Chpt1
Ccl3	Krt14
NA	Pamr1
Apoc1	Emilin2
NA	Hbb-b2
Mrpl20	NA
Fabp3	Clec4a1
Tmem205	Cdh13
Slc4a7	Tnn
Atp5o	Apol11b
Ndufs4	Fxyd3
Rgcc	Tef
Thrsp	Tsc22d3
Ndufb2	Eno3
Mrps7	Arxes2
NA	Reg3g
Bad	NA
NA	NA
Rps24	Agpat2
S100a13	Prdx5
Nfat5	Myh6
Cfap45	NA
Vamp8	Igf2
Timm8b	Cyp4f18
Atp5e	Acaa2
Acadm	Ecm1
Slc40a1	Lrrc15
Cdo1	Parm1
Pim3	Csf3r
Clec2d	Pbxip1
Klf13	Hp
Spen	Rhob
Sult1a1	Mustn1
NA	Ccl11
Osr1	Il1b
Cbx3	Cxcr4
NA	Ngp
Id1	Aebp1
Ces1d	Amica1
Ndufs4	Rbp1
Mmp14	Ppbp
Kmt2e	Cd200
NA	Camp
Col5a1	Col15a1
Mdm2	Angptl4
Kdm3a	Usp2
Ahdc1	Acsl1
Cldn6	Hmox1
5730455P16Rik	NA
Gpx3	AA467197
Bahcc1	Tpm2
Mylk	Gmfg
Dbp	Ndufb10
Slc1a3	Tmem38b
Upk3bl	Cxcl17
Srsf7	Gmfg
Amica1	Sdhb
Ost4	Acaa2
Dido1	Tnni3
Rnf130	Pde1b
Pum1	Lypd2
2410015M20Rik	Sncg
Hnrnpa0	Col12a1
Hnrnpm	Plac8
Acacb	Slc7a11
Klf7	NA
Coro1a	Lbp
Cytip	NA
Ddx6	S100a13
Psap	Cxcl17
NA	Cox6c
Ttll3	Tff2
NA	Srl
Lgals7	Hp
Tmem205	Myom2
Stat2	Cd248
NA	NA
Cidec	Acsl5
Tmem160	Hcar2
Ogt	Ccl4
Clec4b1	NA
Tmem141	NA
Afdn	Ppp1r1a
Chd2	Cyp4a12b
Chchd10	NA
6820431F20Rik	Tsc22d3
Klf2	Srgn
Osr2	Hspb7
Dgat2	Gm5416
1110008P14Rik	NA
Fnbp1	NA
Zbtb7a	Csrp3
Smagp	Ryr2
Fam213a	G0s2
Dusp1	Sdhb
Gng2	Adam8
Ciart	Adig
Snhg17	NA
Oasl2	Clec4e
Rasal2	Acod1
Orm1	Dpt
Lama5	Ccl4
Rbp2	Plin2
2610005L07Rik	Htra1
Ctgf	Adam8
Tsc22d3	Il1r2
Chd2	Ifitm1
Scarf2	Acod1
Gigyf1	Chpt1
Fn1	Ackr1
Fam160b2	Ctgf
Etfa	Sell
Osr2	Tspan4
Tns1	Sprr2d
Srsf5	Per2
Tubb2b	Prok2
Nipbl	Apod
Chd1	Ifitm6
Tmem256	Gstt2
Cox7a2	Pygl
NA	Cxcl2
Cdkn3	NA
Pygl	Per2
NA	Acta2
Pja2	Ubd
Lamb2	Hdc
Spsb1	Zfp36
Gm561	Trem3
Ctgf	Tyrobp
Map1b	Fmo3
1700109H08Rik	NA
Hspa8	Slc22a1
Crabp2	Sfrp1
Phlda1	Atp2a2
Tnrc6b	Actg2
Ppp1r12a	Cyp4f18
App	NA
Polr1a	Cmya5
Pik3r1	Myl9
Kdm2a	Clec4d
Chac1	NA
NA	Dusp1
Actn4	Sfrp1
NA	NA
Pdk4	NA
Hk2	Eef1a2
Zc3h13	Hrc
Gm14439	Cidec
H2-Ea-ps	Rdh12
Ier3	F13a1
NA	Cd177
Arl11	NA
Rack1	S100a9
Pnisr	Ddit4
Prrc2c	NA
Elof1	Acta2
Mmp12	Atp2a2
Gm561	Ctgf
Slc6a6	Myh11
Aif1	Stfa2l1
Cd3d	Mrgpra2b
NA	Pi16
Fosb	Muc5b
H13	Actc1
Slirp	NA
Retnlg	Ucp1
Tsc22d1	Tmem45b
Gmfg	Glycam1
S100a9	NA
Dpysl3	Cidea
Ctsh	Cox6a2
Gzmd	NA
Ptpn18	Ankrd1
H2-Eb1	Wfdc17
Mafg	NA
Gjb2	Pgam2
NA	Pf4
NA	Acta2
Ccnd2	Cxcl2
Bach1	Pglyrp1
Guca1a	Aoc3
Aoc3	Myl9
Gmfg	NA
NA	Asprv1
Gm5483	Gm5483
Cd274	Stfa2
NA	Ankrd1
Hbb-bs	NA
Pde6h	Cyp2e1
Aplp2	Pdk4
Atg9b	Eef1a2
Ankrd12	NA
NA	Ttn
NA	Ccl3
Sprr1b	Cyp2a5
Grem1	Pde4dip
Xaf1	Actn2
Klf6	Cyp2a5
Mir17hg	Per1
Atxn7l3b	Scgb3a1
Cd3g	Ckm
Lst1	Stfa2
Aif1	Ttn
Hdc	Cyp2a5
Prrc2c	Hamp
Sort1	Stfa1
Cox8b	Myl1
Apoc1	Mb
Ctsh	Plin4
Stfa1	Myoz2
Chd1	Myl3
Ly86	Retnlg
Osm	NA
Dctpp1	Stfa1
Arg1	Csrp3
H2-Ab1	Thrsp
S100a8	NA
Arf3	Per1
Cxcl1	Ckmt2
Tyrobp	Scgb3a1
Stfa1	Adipoq
Cxcl16	Actn2
Neat1	Bpifb1
Arg1	Fabp3
H2-Ab1	Mybphl
Ms4a7	Bpifb1
Clec4d	Cox7a1
Rgs10	Myh6
H2-DMb1	Tcap
Wapl	Ckmt2
Car3	Myl4
Cd8b1	Myl1
Ubd	Csrp3
Slc25a37	Dgat2
Il1rl1	Car3
Hspa1a	Cox8b
Krt14	Mb
Cx3cr1	Tnnc1
Adipoq	Myl7
Col1a1	Nppa
Cxcl9	Sln
Hnrnph1	Ltf
Asprv1	Cfd
NA	Bpifa1
Klf9
Cpa3
P2ry14
H2-DMa
Serpina3n
Gzme
Serpina3g
Krt16
Pf4
Krt17
Lpl
Ccl8
Stfa2
NA
NA
Ndrg1
Mgp
Tnc
Fos
Fcgr4
Ly6c1
Lcn2
Gzme
NA
Gzmd
NA
Nkg7
NA
Krt6b
NA
Cd74
Gzmg
Saa3
Cd74
Urah
NA
Ttn
Slamf9
Inmt
Ttn
Hp
Myl1
Tnnc2
Krt8
Ckm
Cd74
Tnnt3
Tpm2
Dmkn
Pvalb
Krtdap
Acta1
Mylpf
Atp2a1
Mylpf
NA

## Sheet: Annotation
Gene	original_id	METAST	TUMOR	Gene ID	Type	Tax ID	Homologene Gene ID	Homologene Gene Tax ID	Gene Symbol	Description	Biological Process (GO)	Kinase Class (UniProt)	Protein Function (Protein Atlas)	Subcellular Location (Protein Atlas)	Drug (DrugBank)	Canonical Pathways_x000D_	Hallmark Gene Sets_x000D_	GO:0002274 myeloid leukocyte activation	GO:0006091 generation of precursor metabo	GO:0030155 regulation of cell adhesion	GO:0009150 purine ribonucleotide metaboli	GO:0001568 blood vessel development	GO:0040017 positive regulation of locomot	GO:0003012 muscle system process	GO:0097435 supramolecular fiber organizat	GO:0032870 cellular response to hormone s	GO:0071396 cellular response to lipid	R-HSA-556833 Metabolism of lipids	GO:0006935 chemotaxis	GO:0043062 extracellular structure organi	GO:0070848 response to growth factor	GO:0002683 negative regulation of immune	GO:0032496 response to lipopolysaccharide	GO:0010035 response to inorganic substanc	GO:0061061 muscle structure development	GO:0090087 regulation of peptide transpor	GO:0009611 response to wounding	TotalEvidenceCount
1809	Dpysl3	1	1	1809	Gene_ID	H. sapiens	1809	H. sapiens	DPYSL3	dihydropyrimidinase like 3	GO:0006208 pyrimidine nucleobase catabolic process;GO:0046113 nucleobase catabolic process;GO:0051764 actin crosslink formation		Predicted intracellular proteins	Cytosol (reliability'])			(M5930)HALLMARK EPITHELIAL MESENCHYMAL TRANSITION	0	0	0	0	0	0	0	1	0	0	0	0	0	0	0	0	0	0	0	1	2
1277	Col1a1	1	1	1277	Gene_ID	H. sapiens	1277	H. sapiens	COL1A1	collagen type I alpha 1 chain	GO:1902618 cellular response to fluoride;GO:0071306 cellular response to vitamin E;GO:1902617 response to fluoride		Predicted intracellular proteins; Disease related genes; FDA approved drug targets:Biotech drugs; Cancer-related genes:Candidate cancer biomarkers; Predicted secreted proteins	Cytosol (reliability']); Additional: Vesicles	Collagenase clostridium histolyticum; Halofuginone; Clove oil; Vonicog Alfa; Von Willebrand Factor Human	(M274)PID LYMPH ANGIOGENESIS PATHWAY; (M53)PID INTEGRIN3 PATHWAY; (M3005)NABA COLLAGENS	(M5942)HALLMARK UV RESPONSE DN; (M5909)HALLMARK MYOGENESIS; (M5930)HALLMARK EPITHELIAL MESENCHYMAL TRANSITION	0	0	1	0	1	1	0	1	1	1	0	1	1	1	1	1	1	0	0	1	2
23253	Ankrd12	1	1	23253	Gene_ID	H. sapiens	23253	H. sapiens	ANKRD12	ankyrin repeat domain 12			Cancer-related genes:Mutational cancer driver genes; Predicted intracellular proteins	Nucleoplasm (reliability']); Additional: Cytosol				0	0	0	0	0	0	0	0	0	0	0	0	0	0	0	0	0	0	0	0	2
667	Dst	1	1	667	Gene_ID	H. sapiens	667	H. sapiens	DST	dystonin	GO:0031581 hemidesmosome assembly;GO:0030011 maintenance of cell polarity;GO:0008090 retrograde axonal transport		Cancer-related genes:Candidate cancer biomarkers; Disease related genes; Predicted intracellular proteins	Microtubules;Nucleoplasm (reliability']); Additional: Cytosol		(M256)PID TAP63 PATHWAY	(M5910)HALLMARK PROTEIN SECRETION; (M5893)HALLMARK MITOTIC SPINDLE; (M5930)HALLMARK EPITHELIAL MESENCHYMAL TRANSITION	0	0	0	0	0	0	0	1	0	0	0	0	1	0	0	0	0	0	0	1	2
7145	Tns1	1	1	7145	Gene_ID	H. sapiens	7145	H. sapiens	TNS1	tensin 1	GO:0010761 fibroblast migration;GO:0007044 cell-substrate junction assembly;GO:0034329 cell junction assembly		Predicted intracellular proteins	Focal adhesion sites (reliability'])		(M71)PID ILK PATHWAY	(M5945)HALLMARK HEME METABOLISM	0	0	0	0	0	0	0	0	0	0	0	0	0	0	0	0	0	0	0	0	2
54882	Ankhd1	1	1	54882	Gene_ID	H. sapiens	54882	H. sapiens	ANKHD1	ankyrin repeat and KH domain containing 1	GO:0045087 innate immune response;GO:0006952 defense response;GO:0006955 immune response		Predicted intracellular proteins					0	0	0	0	0	0	0	0	0	0	0	0	0	0	0	0	0	0	0	0	2
6623	Sncg	1	1	6623	Gene_ID	H. sapiens	6623	H. sapiens	SNCG	synuclein gamma	GO:0014046 dopamine secretion;GO:0014059 regulation of dopamine secretion;GO:0015872 dopamine transport		Predicted intracellular proteins; Transporters:Transporter channels and pores	Centrosome (reliability']); Additional: Nuclear bodies			(M5905)HALLMARK ADIPOGENESIS	0	0	0	0	0	0	0	0	0	0	0	0	0	0	0	0	0	0	1	0	2
6160	Rpl31	1	1	6160	Gene_ID	H. sapiens	6160	H. sapiens	RPL31	ribosomal protein L31	GO:0002181 cytoplasmic translation;GO:0006614 SRP-dependent cotranslational protein targeting to membrane;GO:0006613 cotranslational protein targeting to membrane		Ribosomal proteins; Predicted intracellular proteins					0	0	0	0	0	0	0	0	0	0	0	0	0	0	0	0	0	0	0	0	2
1843	Dusp1	1	1	1843	Gene_ID	H. sapiens	1843	H. sapiens	DUSP1	dual specificity phosphatase 1	GO:0090027 negative regulation of monocyte chemotaxis;GO:0071676 negative regulation of mononuclear cell migration;GO:1903753 negative regulation of p38MAPK cascade		ENZYME proteins:Hydrolases; Cancer-related genes:Candidate cancer biomarkers; Predicted intracellular proteins; Enzymes	Nucleoli (reliability']); Additional: Cytosol		(M76)PID P38 ALPHA BETA PATHWAY; (M12705)SIG CD40PATHWAYMAP; (M166)PID ATF2 PATHWAY	(M5942)HALLMARK UV RESPONSE DN; (M5890)HALLMARK TNFA SIGNALING VIA NFKB; (M5891)HALLMARK HYPOXIA	0	0	1	0	0	0	0	0	1	1	0	1	0	0	1	0	1	0	0	0	2
487	Atp2a1	1	1	487	Gene_ID	H. sapiens	487	H. sapiens	ATP2A1	ATPase sarcoplasmic/endoplasmic reticulum Ca2+ transporting 1	GO:0031446 regulation of fast-twitch skeletal muscle fiber contraction;GO:0031448 positive regulation of fast-twitch skeletal muscle fiber contraction;GO:0051659 maintenance of mitochondrion location		Predicted intracellular proteins; Disease related genes; ENZYME proteins:Hydrolases; Enzymes; Potential drug targets	Endoplasmic reticulum (reliability'])	Enflurane; Adenosine-5'-[Beta, Gamma-Methylene]Triphosphate; Tetrafluoroaluminate Ion; 2,5-di-tert-butylhydroquinone; (6AR,11AS,11BR)-10-ACETYL-9-HYDROXY-7,7-DIMETHYL-2,6,6A,7,11A,11B-HEXAHYDRO-11H-PYRROLO[1',2':2,3]ISOINDOLO[4,5,6-CD]INDOL-11-ONE		(M5909)HALLMARK MYOGENESIS	0	1	0	0	0	1	1	1	0	0	0	0	0	0	0	0	0	0	0	0	2
3339	Hspg2	1	1	3339	Gene_ID	H. sapiens	3339	H. sapiens	HSPG2	heparan sulfate proteoglycan 2	GO:0006027 glycosaminoglycan catabolic process;GO:0006026 aminoglycan catabolic process;GO:0001523 retinoid metabolic process		Disease related genes; Predicted secreted proteins; Predicted intracellular proteins	Cytosol;Nucleoplasm;Plasma membrane (reliability'])	Palifermin	(M5882)NABA PROTEOGLYCANS; (M5887)NABA BASEMENT MEMBRANES; (M5884)NABA CORE MATRISOME		0	0	0	1	1	0	0	0	0	0	0	0	1	0	0	0	0	0	0	0	2
9497	Slc4a7	1	1	9497	Gene_ID	H. sapiens	9497	H. sapiens	SLC4A7	solute carrier family 4 member 7	GO:0060117 auditory receptor cell development;GO:0042491 inner ear auditory receptor cell differentiation;GO:0015701 bicarbonate transport		Transporters:Electrochemical Potential-driven transporters	Plasma membrane (reliability']); Additional: Cytosol;Focal adhesion sites				0	0	0	0	0	0	0	0	0	0	0	0	0	0	0	0	0	0	0	0	2
4724	Ndufs4	1	1	4724	Gene_ID	H. sapiens	4724	H. sapiens	NDUFS4	NADH:ubiquinone oxidoreductase subunit S4	GO:0048146 positive regulation of fibroblast proliferation;GO:0006120 mitochondrial electron transport, NADH to ubiquinone;GO:0010257 NADH dehydrogenase complex assembly		Disease related genes; Predicted intracellular proteins	Mitochondria (reliability'])	NADH		(M5936)HALLMARK OXIDATIVE PHOSPHORYLATION	0	1	0	1	0	0	0	0	0	0	0	0	0	0	0	0	0	0	0	0	2
9493	Kif23	1	1	9493	Gene_ID	H. sapiens	9493	H. sapiens	KIF23	kinesin family member 23	GO:0000912 assembly of actomyosin apparatus involved in cytokinesis;GO:0000915 actomyosin contractile ring assembly;GO:0044837 actomyosin contractile ring organization		Predicted intracellular proteins	Nucleoplasm (reliability']); Additional: Midbody ring;Mitotic spindle		(M14)PID AURORA B PATHWAY	(M5893)HALLMARK MITOTIC SPINDLE; (M5901)HALLMARK G2M CHECKPOINT	0	0	0	0	0	0	0	1	0	0	0	0	0	0	0	0	0	1	0	0	2
283131	Neat1	1	1	283131	Gene_ID	H. sapiens	283131	H. sapiens	NEAT1	nuclear paraspeckle assembly transcript 1	GO:1901647 positive regulation of synoviocyte proliferation;GO:0002941 synoviocyte proliferation;GO:1901645 regulation of synoviocyte proliferation							0	0	0	0	0	0	0	0	0	0	0	1	0	0	0	0	0	0	0	0	2
7316	Ubc	1	1	7316	Gene_ID	H. sapiens	7316	H. sapiens	UBC	ubiquitin C	GO:0042276 error-prone translesion synthesis;GO:0000717 nucleotide-excision repair, DNA duplex unwinding;GO:0070987 error-free translesion synthesis		Predicted intracellular proteins		N-Formylmethionine		(M5905)HALLMARK ADIPOGENESIS	0	0	0	0	0	0	0	0	0	1	0	0	0	1	0	1	0	0	0	0	2
23224	Syne2	1	1	23224	Gene_ID	H. sapiens	23224	H. sapiens	SYNE2	spectrin repeat containing nuclear envelope protein 2	GO:0031022 nuclear migration along microfilament;GO:0021817 nucleokinesis involved in cell motility in cerebral cortex radial glia guided migration;GO:0021815 modulation of microtubule cytoskeleton involved in cerebral cortex radial glia guided migration		Disease related genes; Predicted intracellular proteins	Intermediate filaments;Nuclear membrane (reliability'])				0	0	0	0	0	1	1	0	0	0	0	0	0	0	0	0	0	0	0	0	2
7008	Tef	1	1	7008	Gene_ID	H. sapiens	7008	H. sapiens	TEF	TEF transcription factor, PAR bZIP family member	GO:0048511 rhythmic process;GO:0045944 positive regulation of transcription by RNA polymerase II;GO:0045893 positive regulation of transcription, DNA-templated		Transcription factors:Basic domains; Predicted intracellular proteins					0	0	0	0	0	0	0	0	0	0	0	0	0	0	0	0	0	0	0	0	2
149685	Adig	1	1	149685	Gene_ID	H. sapiens	149685	H. sapiens	ADIG	adipogenin	GO:0050872 white fat cell differentiation;GO:0050873 brown fat cell differentiation;GO:0045600 positive regulation of fat cell differentiation		Predicted intracellular proteins				(M5905)HALLMARK ADIPOGENESIS	0	0	0	0	0	0	0	0	0	0	0	0	0	0	0	0	0	0	0	0	2
5004	Orm1	1	1	5004	Gene_ID	H. sapiens	5004	H. sapiens	ORM1	orosomucoid 1	GO:1904469 positive regulation of tumor necrosis factor secretion;GO:1904467 regulation of tumor necrosis factor secretion;GO:0006953 acute-phase response		Cancer-related genes:Candidate cancer biomarkers; Candidate cardiovascular disease genes; Predicted secreted proteins	Vesicles (reliability']); Additional: Golgi apparatus	Amsacrine; Lidocaine; Progesterone; Chlorpromazine; Dipyridamole; Thalidomide		(M5905)HALLMARK ADIPOGENESIS	1	0	0	0	0	0	0	0	0	0	0	0	0	0	0	0	0	0	1	0	2
23186	Rcor1	1	1	23186	Gene_ID	H. sapiens	23186	H. sapiens	RCOR1	REST corepressor 1	GO:0070933 histone H4 deacetylation;GO:0016575 histone deacetylation;GO:0006476 protein deacetylation		Predicted intracellular proteins	Nucleoplasm (reliability'])				0	1	0	0	0	0	0	0	0	0	0	0	0	0	0	0	0	0	0	1	2
65125	Wnk1	1	1	65125	Gene_ID	H. sapiens	65125	H. sapiens	WNK1	WNK lysine deficient protein kinase 1	GO:0097022 lymphocyte migration into lymph node;GO:0033633 negative regulation of cell-cell adhesion mediated by integrin;GO:0023016 signal transduction by trans-phosphorylation	Other	Predicted intracellular proteins; Disease related genes; Enzymes; Potential drug targets; ENZYME proteins:Transferases; Kinases	Cytosol (reliability'])				0	0	1	0	0	1	0	0	0	0	0	1	0	0	1	0	0	0	0	0	2
7169	Tpm2	1	1	7169	Gene_ID	H. sapiens	7169	H. sapiens	TPM2	tropomyosin 2	GO:0030049 muscle filament sliding;GO:0033275 actin-myosin filament sliding;GO:0043462 regulation of ATPase activity		Cancer-related genes:Candidate cancer biomarkers; Disease related genes; Predicted intracellular proteins				(M5909)HALLMARK MYOGENESIS; (M5930)HALLMARK EPITHELIAL MESENCHYMAL TRANSITION	0	0	0	0	0	0	1	1	0	0	0	0	0	0	0	0	0	0	0	0	2
1158	Ckm	1	1	1158	Gene_ID	H. sapiens	1158	H. sapiens	CKM	creatine kinase, M-type	GO:0006599 phosphagen metabolic process;GO:0006603 phosphocreatine metabolic process;GO:0042396 phosphagen biosynthetic process		Predicted intracellular proteins; FDA approved drug targets:Small molecule drugs; Enzymes; Candidate cardiovascular disease genes; ENZYME proteins:Transferases		Creatine; (Diaminomethyl-Methyl-Amino)-Acetic Acid; D-arginine; Phosphocreatine	(M279)PID RB 1PATHWAY	(M5909)HALLMARK MYOGENESIS; (M5956)HALLMARK KRAS SIGNALING DN	0	0	0	1	0	0	0	0	0	0	0	0	0	0	0	0	0	0	0	0	2
7069	Thrsp	1	1	7069	Gene_ID	H. sapiens	7069	H. sapiens	THRSP	thyroid hormone responsive	GO:0006853 carnitine shuttle;GO:1902001 fatty acid transmembrane transport;GO:0010866 regulation of triglyceride biosynthetic process		Predicted intracellular proteins	Nucleoplasm (reliability'])				0	0	0	0	0	0	0	0	0	0	1	0	0	0	0	1	0	0	0	0	2
25836	Nipbl	1	1	25836	Gene_ID	H. sapiens	25836	H. sapiens	NIPBL	NIPBL cohesin loading factor	GO:0070550 rDNA condensation;GO:0061780 mitotic cohesin loading;GO:0120187 positive regulation of protein localization to chromatin		Disease related genes; Predicted intracellular proteins	Nucleoplasm (reliability']); Additional: Cytosol;Vesicles			(M5942)HALLMARK UV RESPONSE DN	0	0	0	0	0	1	0	0	0	0	0	0	0	0	0	0	0	0	0	0	2
10124	Arl4a	1	1	10124	Gene_ID	H. sapiens	10124	H. sapiens	ARL4A	ADP ribosylation factor like GTPase 4A	GO:0050873 brown fat cell differentiation;GO:0045444 fat cell differentiation;GO:0006886 intracellular protein transport		Predicted intracellular proteins	Nucleoplasm (reliability']); Additional: Cytosol			(M5951)HALLMARK SPERMATOGENESIS; (M5947)HALLMARK IL2 STAT5 SIGNALING; (M5905)HALLMARK ADIPOGENESIS	0	0	0	0	0	0	0	0	0	0	0	0	0	0	0	0	0	0	0	0	2
81502	H13	1	1	81502	Gene_ID	H. sapiens	81502	H. sapiens	HM13	histocompatibility minor 13	GO:1904211 membrane protein proteolysis involved in retrograde protein transport, ER to cytosol;GO:0006465 signal peptide processing;GO:0031293 membrane protein intracellular domain proteolysis		Peptidases:Aspartic-type peptidases; Enzymes	Endoplasmic reticulum (reliability'])	Theophylline			0	0	0	0	0	0	0	0	0	0	0	0	0	0	0	0	0	0	0	0	2
23091	Zc3h13	1	1	23091	Gene_ID	H. sapiens	23091	H. sapiens	ZC3H13	zinc finger CCCH-type containing 13	GO:0080009 mRNA methylation;GO:0016556 mRNA modification;GO:2000036 regulation of stem cell population maintenance		Predicted intracellular proteins	Actin filaments;Nuclear membrane (reliability'])				0	0	0	0	0	0	0	0	0	0	0	0	0	0	0	0	0	0	0	0	2
29984	Rhod	1	1	29984	Gene_ID	H. sapiens	29984	H. sapiens	RHOD	ras homolog family member D	GO:2000249 regulation of actin cytoskeleton reorganization;GO:0030865 cortical cytoskeleton organization;GO:0051893 regulation of focal adhesion assembly		Predicted intracellular proteins				(M5906)HALLMARK ESTROGEN RESPONSE EARLY	0	0	1	0	0	1	0	1	0	0	0	0	0	0	0	0	0	0	0	0	2
112399	Egln3	1	1	112399	Gene_ID	H. sapiens	112399	H. sapiens	EGLN3	egl-9 family hypoxia inducible factor 3	GO:0018401 peptidyl-proline hydroxylation to 4-hydroxy-L-proline;GO:0019471 4-hydroxyproline metabolic process;GO:0019511 peptidyl-proline hydroxylation		ENZYME proteins:Oxidoreductases; Predicted intracellular proteins; Enzymes	Cytosol (reliability'])	Ascorbic acid; Roxadustat	(M180)PID HIF1A PATHWAY; (M44)PID HIF2PATHWAY; (M255)PID HIF1 TFPATHWAY	(M5924)HALLMARK MTORC1 SIGNALING; (M5937)HALLMARK GLYCOLYSIS	0	0	0	0	0	0	0	0	0	0	0	0	0	0	0	0	0	0	0	0	2
761	Car3	1	1	761	Gene_ID	H. sapiens	761	H. sapiens	CA3	carbonic anhydrase 3	GO:0006730 one-carbon metabolic process;GO:0015701 bicarbonate transport;GO:0045471 response to ethanol		FDA approved drug targets:Small molecule drugs; ENZYME proteins:Lyases; Predicted intracellular proteins; Enzymes		Topiramate; Ethoxzolamide; Sulpiride; Celecoxib; Valdecoxib; Methazolamide; Acetazolamide; Dorzolamide; Zonisamide; Diclofenamide; Brinzolamide; Ellagic acid; Saccharin			0	0	0	0	0	0	0	0	0	0	0	0	0	0	0	1	0	0	0	0	2
445815	Akap2	1	1	445815	Gene_ID	H. sapiens	445815	H. sapiens	PALM2AKAP2	PALM2 and AKAP2 fusion	GO:0008360 regulation of cell shape;GO:0022604 regulation of cell morphogenesis;GO:0000902 cell morphogenesis		Predicted intracellular proteins	Plasma membrane (reliability']); Additional: Nuclear bodies;Nucleoplasm				0	0	0	0	0	0	0	0	0	0	0	0	0	0	0	0	0	0	0	0	2
1656	Ddx6	1	1	1656	Gene_ID	H. sapiens	1656	H. sapiens	DDX6	DEAD-box helicase 6	GO:0019072 viral genome packaging;GO:0019074 viral RNA genome packaging;GO:0033962 cytoplasmic mRNA processing body assembly		Predicted intracellular proteins; Disease related genes; Cancer-related genes; ENZYME proteins:Hydrolases; Enzymes; Potential drug targets	Cytoplasmic bodies (reliability']); Additional: Cytosol	D-tartaric acid			0	0	0	0	0	0	0	0	0	0	0	0	0	0	0	0	0	0	0	0	2
571	Bach1	1	1	571	Gene_ID	H. sapiens	571	H. sapiens	BACH1	BTB domain and CNC homolog 1	GO:0000117 regulation of transcription involved in G2/M transition of mitotic cell cycle;GO:0000083 regulation of transcription involved in G1/S transition of mitotic cell cycle;GO:0061418 regulation of transcription from RNA polymerase II promoter in response to hypoxia		Transcription factors:Basic domains; Predicted intracellular proteins	Nucleoplasm (reliability']); Additional: Cytosol			(M5945)HALLMARK HEME METABOLISM	0	0	0	0	0	0	0	0	0	0	0	0	0	0	0	0	0	0	0	0	2
56994	Chpt1	1	1	56994	Gene_ID	H. sapiens	56994	H. sapiens	CHPT1	choline phosphotransferase 1	GO:0006663 platelet activating factor biosynthetic process;GO:0006657 CDP-choline pathway;GO:0046469 platelet activating factor metabolic process		ENZYME proteins:Transferases; Enzymes	Vesicles (reliability'])			(M5906)HALLMARK ESTROGEN RESPONSE EARLY; (M5907)HALLMARK ESTROGEN RESPONSE LATE	0	0	0	1	0	0	0	0	0	0	1	0	0	0	0	0	0	0	0	0	2
2734	Glg1	1	1	2734	Gene_ID	H. sapiens	2734	H. sapiens	GLG1	golgi glycoprotein 1	GO:0010955 negative regulation of protein processing;GO:1903318 negative regulation of protein maturation;GO:0032330 regulation of chondrocyte differentiation		Predicted intracellular proteins	Golgi apparatus (reliability'])				0	0	0	0	0	0	0	0	0	0	0	1	0	1	0	0	0	0	0	0	2
404544	Cox8b	1	1	404544	Gene_ID	H. sapiens	404544	H. sapiens	COX8BP	cytochrome c oxidase subunit 8B, pseudogene								0	0	0	0	0	0	0	0	0	0	0	0	0	0	0	0	0	0	0	0	2
340481	Zdhhc21	1	1	340481	Gene_ID	H. sapiens	340481	H. sapiens	ZDHHC21	zinc finger DHHC-type palmitoyltransferase 21	GO:0048733 sebaceous gland development;GO:0018230 peptidyl-L-cysteine S-palmitoylation;GO:0018231 peptidyl-S-diacylglycerol-L-cysteine biosynthetic process from peptidyl-cysteine		ENZYME proteins:Transferases; Enzymes	Cytosol;Golgi apparatus (reliability'])				0	0	0	0	0	0	0	0	0	0	0	0	0	0	0	0	0	0	0	0	2
10397	Ndrg1	1	1	10397	Gene_ID	H. sapiens	10397	H. sapiens	NDRG1	N-myc downstream regulated 1	GO:0032287 peripheral nervous system myelin maintenance;GO:0043217 myelin maintenance;GO:0022011 myelination in peripheral nervous system		Cancer-related genes:Candidate cancer biomarkers; Disease related genes; Predicted intracellular proteins	Cytosol (reliability']); Additional: Microtubules		(M254)PID MYC REPRESS PATHWAY; (M255)PID HIF1 TFPATHWAY; (M145)PID P53 DOWNSTREAM PATHWAY	(M5908)HALLMARK ANDROGEN RESPONSE; (M5947)HALLMARK IL2 STAT5 SIGNALING; (M5891)HALLMARK HYPOXIA	1	0	0	0	0	0	0	0	0	0	0	0	0	0	0	0	1	0	0	0	2
54541	Ddit4	1	1	54541	Gene_ID	H. sapiens	54541	H. sapiens	DDIT4	DNA damage inducible transcript 4	GO:0045820 negative regulation of glycolytic process;GO:0030812 negative regulation of nucleotide catabolic process;GO:0051198 negative regulation of coenzyme metabolic process		Predicted intracellular proteins	Cytosol (reliability'])		(M121)PID MTOR 4PATHWAY; (M145)PID P53 DOWNSTREAM PATHWAY	(M5922)HALLMARK UNFOLDED PROTEIN RESPONSE; (M5891)HALLMARK HYPOXIA; (M5924)HALLMARK MTORC1 SIGNALING	0	1	0	1	0	0	0	0	1	1	1	0	0	1	0	0	0	0	0	0	2
1105	Chd1	1	1	1105	Gene_ID	H. sapiens	1105	H. sapiens	CHD1	chromodomain helicase DNA binding protein 1	GO:0043923 positive regulation by host of viral transcription;GO:0043921 modulation by host of viral transcription;GO:0052472 modulation by host of symbiont transcription		Predicted intracellular proteins; FDA approved drug targets:Small molecule drugs; Disease related genes; ENZYME proteins:Hydrolases; Enzymes	Nucleoli fibrillar center;Nucleoplasm (reliability'])				0	0	0	0	0	0	0	0	0	0	0	0	0	0	0	0	0	0	0	0	2
219699	Unc5b	1	1	219699	Gene_ID	H. sapiens	219699	H. sapiens	UNC5B	unc-5 netrin receptor B	GO:0033564 anterior/posterior axon guidance;GO:0038007 netrin-activated signaling pathway;GO:1901099 negative regulation of signal transduction in absence of ligand					(M108)PID NETRIN PATHWAY		0	0	0	0	1	0	0	0	0	0	0	1	0	0	0	0	0	0	0	0	2
23063	Wapl	1	1	23063	Gene_ID	H. sapiens	23063	H. sapiens	WAPL	WAPL cohesin release factor	GO:0045875 negative regulation of sister chromatid cohesion;GO:0060623 regulation of chromosome condensation;GO:0071922 regulation of cohesin loading		Predicted intracellular proteins					0	0	0	0	0	0	0	0	0	0	0	0	0	0	0	0	0	0	0	0	2
945	Cd33	1	1	945	Gene_ID	H. sapiens	945	H. sapiens	CD33	CD33 molecule	GO:1903615 positive regulation of protein tyrosine phosphatase activity;GO:1903613 regulation of protein tyrosine phosphatase activity;GO:0002765 immune response-inhibiting signal transduction		CD markers; FDA approved drug targets:Biotech drugs	Nucleoplasm;Plasma membrane (reliability'])	Gemtuzumab ozogamicin; AVE9633			1	0	0	0	0	0	0	0	0	0	0	0	0	0	0	0	0	0	1	0	2
5166	Pdk4	1	1	5166	Gene_ID	H. sapiens	5166	H. sapiens	PDK4	pyruvate dehydrogenase kinase 4	GO:1904183 negative regulation of pyruvate dehydrogenase activity;GO:0010510 regulation of acetyl-CoA biosynthetic process from pyruvate;GO:0050812 regulation of acyl-CoA biosynthetic process	Atypical: PDK/BCKDK protein kinase family	Kinases:Atypical kinases; ENZYME proteins:Transferases; Predicted intracellular proteins; Enzymes		Tretinoin; 4-[4-(4-methoxyphenyl)-5-methyl-1H-pyrazol-3-yl]benzene-1,3-diol		(M5934)HALLMARK XENOBIOTIC METABOLISM; (M5936)HALLMARK OXIDATIVE PHOSPHORYLATION	0	1	0	1	0	0	0	0	1	1	1	0	0	0	0	0	0	0	0	0	2
219790	Rtkn2	1	1	219790	Gene_ID	H. sapiens	219790	H. sapiens	RTKN2	rhotekin 2	GO:1901224 positive regulation of NIK/NF-kappaB signaling;GO:2001243 negative regulation of intrinsic apoptotic signaling pathway;GO:1901222 regulation of NIK/NF-kappaB signaling		Predicted intracellular proteins	Nucleoplasm (reliability']); Additional: Mitochondria				0	0	0	0	0	0	0	0	0	0	0	0	0	0	0	0	0	0	0	0	2
4131	Map1b	1	1	4131	Gene_ID	H. sapiens	4131	H. sapiens	MAP1B	microtubule associated protein 1B	GO:0051913 regulation of synaptic plasticity by chemical substance;GO:0051914 positive regulation of synaptic plasticity by chemical substance;GO:0051915 induction of synaptic plasticity by chemical substance		Predicted intracellular proteins	Cytosol (reliability'])		(M69)PID REELIN PATHWAY; (M163)PID LIS1 PATHWAY; (M108)PID NETRIN PATHWAY	(M5942)HALLMARK UV RESPONSE DN	0	0	0	0	0	0	0	1	1	0	0	0	0	1	0	0	1	0	0	1	2
7940	Lst1	1	1	7940	Gene_ID	H. sapiens	7940	H. sapiens	LST1	leukocyte specific transcript 1	GO:0050672 negative regulation of lymphocyte proliferation;GO:0032945 negative regulation of mononuclear cell proliferation;GO:0070664 negative regulation of leukocyte proliferation		Predicted intracellular proteins					0	0	1	0	0	0	0	0	0	0	0	0	0	0	1	0	0	0	0	0	2
165	Aebp1	1	1	165	Gene_ID	H. sapiens	165	H. sapiens	AEBP1	AE binding protein 1	GO:1904026 regulation of collagen fibril organization;GO:1903053 regulation of extracellular matrix organization;GO:0030199 collagen fibril organization		Predicted secreted proteins; Peptidases:Metallopeptidases; Predicted intracellular proteins; Enzymes	Vesicles (reliability']); Additional: Cytosol;Nucleoplasm		(M3008)NABA ECM GLYCOPROTEINS; (M5884)NABA CORE MATRISOME; (M5889)NABA MATRISOME	(M5909)HALLMARK MYOGENESIS	0	0	0	0	0	0	0	1	0	0	0	0	1	0	0	0	0	0	0	0	2
10555	Agpat2	1	1	10555	Gene_ID	H. sapiens	10555	H. sapiens	AGPAT2	1-acylglycerol-3-phosphate O-acyltransferase 2	GO:0016024 CDP-diacylglycerol biosynthetic process;GO:0046341 CDP-diacylglycerol metabolic process;GO:0006221 pyrimidine nucleotide biosynthetic process		Potential drug targets; Disease related genes; ENZYME proteins:Transferases; Enzymes	Centrosome (reliability'])				1	0	0	1	0	0	0	0	0	0	1	0	0	0	0	0	0	0	0	0	2
5196	Pf4	1	1	5196	Gene_ID	H. sapiens	5196	H. sapiens	PF4	platelet factor 4	GO:0045347 negative regulation of MHC class II biosynthetic process;GO:0045346 regulation of MHC class II biosynthetic process;GO:0045651 positive regulation of macrophage differentiation		Cancer-related genes:Candidate cancer biomarkers; Candidate cardiovascular disease genes; Predicted secreted proteins		Drotrecogin alfa; Heparin	(M222)PID CXCR3 PATHWAY; (M5883)NABA SECRETED FACTORS; (M5885)NABA MATRISOME ASSOCIATED	(M5944)HALLMARK ANGIOGENESIS; (M5897)HALLMARK IL6 JAK STAT3 SIGNALING; (M5946)HALLMARK COAGULATION	1	0	0	0	1	0	0	0	0	1	0	1	0	0	1	1	0	0	0	1	2
7003	Tead1	1	1	7003	Gene_ID	H. sapiens	7003	H. sapiens	TEAD1	TEA domain transcription factor 1	GO:1902895 positive regulation of pri-miRNA transcription by RNA polymerase II;GO:0035329 hippo signaling;GO:1902893 regulation of pri-miRNA transcription by RNA polymerase II		Transcription factors:Helix-turn-helix domains; Disease related genes; Predicted intracellular proteins	Nucleoplasm (reliability'])				0	0	0	0	0	0	0	0	0	0	0	0	0	0	0	0	0	0	0	0	2
4257	Mgst1	1	1	4257	Gene_ID	H. sapiens	4257	H. sapiens	MGST1	microsomal glutathione S-transferase 1	GO:0071449 cellular response to lipid hydroperoxide;GO:0006982 response to lipid hydroperoxide;GO:0071447 cellular response to hydroperoxide		ENZYME proteins:Transferases; Predicted intracellular proteins; Enzymes	Mitochondria (reliability']); Additional: Endoplasmic reticulum	Glutathione; Glutathione disulfide		(M5938)HALLMARK REACTIVE OXYGEN SPECIES PATHWAY	1	0	0	0	0	0	0	0	0	0	0	0	0	0	0	1	0	0	0	0	2
2920	Cxcl2	1	1	2920	Gene_ID	H. sapiens	2920	H. sapiens	CXCL2	C-X-C motif chemokine ligand 2	GO:0061844 antimicrobial humoral immune response mediated by antimicrobial peptide;GO:0070098 chemokine-mediated signaling pathway;GO:1990868 response to chemokine		Cancer-related genes:Candidate cancer biomarkers; Predicted secreted proteins			(M5883)NABA SECRETED FACTORS; (M5885)NABA MATRISOME ASSOCIATED; (M5889)NABA MATRISOME	(M5941)HALLMARK UV RESPONSE UP; (M5890)HALLMARK TNFA SIGNALING VIA NFKB	0	0	0	0	0	0	0	0	0	1	0	1	0	0	0	1	0	0	0	0	2
2108	Etfa	1	1	2108	Gene_ID	H. sapiens	2108	H. sapiens	ETFA	electron transfer flavoprotein subunit alpha	GO:0033539 fatty acid beta-oxidation using acyl-CoA dehydrogenase;GO:0006635 fatty acid beta-oxidation;GO:0019395 fatty acid oxidation		Disease related genes; Predicted intracellular proteins	Mitochondria (reliability'])			(M5936)HALLMARK OXIDATIVE PHOSPHORYLATION	0	1	0	0	0	0	0	0	0	0	1	0	0	0	0	0	0	0	0	0	2
6351	Ccl4	1	1	6351	Gene_ID	H. sapiens	6351	H. sapiens	CCL4	C-C motif chemokine ligand 4	GO:2000503 positive regulation of natural killer cell chemotaxis;GO:2000501 regulation of natural killer cell chemotaxis;GO:0035747 natural killer cell chemotaxis		Cancer-related genes:Candidate cancer biomarkers; Predicted secreted proteins			(M54)PID IL12 2PATHWAY; (M5883)NABA SECRETED FACTORS; (M5885)NABA MATRISOME ASSOCIATED	(M5890)HALLMARK TNFA SIGNALING VIA NFKB; (M5950)HALLMARK ALLOGRAFT REJECTION	0	0	0	0	0	1	0	0	0	0	0	1	0	0	0	1	0	0	0	0	2
32	Acacb	1	1	32	Gene_ID	H. sapiens	32	H. sapiens	ACACB	acetyl-CoA carboxylase beta	GO:2001295 malonyl-CoA biosynthetic process;GO:2001293 malonyl-CoA metabolic process;GO:0031999 negative regulation of fatty acid beta-oxidation		Predicted intracellular proteins; ENZYME proteins:Ligase; Enzymes		Biotin; Adenine; Soraphen A; 2-[4-(2,4-Dichlorophenoxy)Phenoxy]Propanoic Acid; Haloxyfop-P			0	0	0	1	0	0	0	0	0	0	1	0	0	0	0	0	0	0	0	0	2
89796	Nav1	1	1	89796	Gene_ID	H. sapiens	89796	H. sapiens	NAV1	neuron navigator 1	GO:0001578 microtubule bundle formation;GO:0001764 neuron migration;GO:0000226 microtubule cytoskeleton organization		Predicted intracellular proteins	Microtubules (reliability'])				0	0	0	0	0	0	0	0	0	0	0	0	0	0	0	0	0	0	0	0	2
6817	Sult1a1	1	1	6817	Gene_ID	H. sapiens	6817	H. sapiens	SULT1A1	sulfotransferase family 1A member 1	GO:0006068 ethanol catabolic process;GO:0034310 primary alcohol catabolic process;GO:0009812 flavonoid metabolic process		ENZYME proteins:Transferases; Predicted intracellular proteins; Enzymes		Adenosine 3',5'-diphosphate; P-Nitrophenol		(M5941)HALLMARK UV RESPONSE UP; (M5905)HALLMARK ADIPOGENESIS	0	0	0	1	0	0	0	0	0	0	0	0	0	0	0	0	0	0	0	0	2
286133	Scara5	1	1	286133	Gene_ID	H. sapiens	286133	H. sapiens	SCARA5	scavenger receptor class A member 5	GO:0070207 protein homotrimerization;GO:0070206 protein trimerization;GO:0034755 iron ion transmembrane transport		Predicted intracellular proteins					0	0	0	0	0	0	0	0	0	0	0	0	0	0	0	0	0	0	0	0	2
23613	Zmynd8	1	1	23613	Gene_ID	H. sapiens	23613	H. sapiens	ZMYND8	zinc finger MYND-type containing 8	GO:1902897 regulation of postsynaptic density protein 95 clustering;GO:1902952 positive regulation of dendritic spine maintenance;GO:0097119 postsynaptic density protein 95 clustering		Predicted intracellular proteins	Nucleoplasm (reliability']); Additional: Golgi apparatus				0	0	0	0	0	0	0	0	0	0	0	0	0	0	0	0	0	0	0	0	2
4651	Myo10	1	1	4651	Gene_ID	H. sapiens	4651	H. sapiens	MYO10	myosin X	GO:0051489 regulation of filopodium assembly;GO:0046847 filopodium assembly;GO:0002433 immune response-regulating cell surface receptor signaling pathway involved in phagocytosis		Predicted intracellular proteins	Cytosol;Plasma membrane (reliability']); Additional: Nucleoli		(M108)PID NETRIN PATHWAY		0	0	1	0	0	0	0	0	0	0	0	0	0	0	0	0	0	0	0	0	2
23195	Mdn1	1	1	23195	Gene_ID	H. sapiens	23195	H. sapiens	MDN1	midasin AAA ATPase 1	GO:0000027 ribosomal large subunit assembly;GO:0042255 ribosome assembly;GO:0042273 ribosomal large subunit biogenesis		Predicted intracellular proteins	Cytosol;Nucleoli (reliability']); Additional: Intermediate filaments;Nucleoplasm				0	0	0	0	0	0	0	0	0	0	0	0	0	0	0	0	0	0	0	0	2
11335	Cbx3	1	1	11335	Gene_ID	H. sapiens	11335	H. sapiens	CBX3	chromobox 3	GO:0071549 cellular response to dexamethasone stimulus;GO:0071548 response to dexamethasone;GO:0070317 negative regulation of G0 to G1 transition		Predicted intracellular proteins	Nucleoplasm (reliability']); Additional: Nuclear bodies			(M5928)HALLMARK MYC TARGETS V2; (M5926)HALLMARK MYC TARGETS V1	0	0	0	0	0	0	0	0	1	1	0	0	0	0	0	0	0	0	0	0	2
55151	Tmem38b	1	1	55151	Gene_ID	H. sapiens	55151	H. sapiens	TMEM38B	transmembrane protein 38B	GO:0061033 secretion by lung epithelial cell involved in lung growth;GO:0060437 lung growth;GO:0071313 cellular response to caffeine		Potential drug targets; Disease related genes; Predicted intracellular proteins; Transporters:Transporter channels and pores					0	0	0	1	0	0	1	0	1	1	0	0	1	0	0	0	0	0	0	0	2
9867	Pja2	1	1	9867	Gene_ID	H. sapiens	9867	H. sapiens	PJA2	praja ring finger ubiquitin ligase 2	GO:0034137 positive regulation of toll-like receptor 2 signaling pathway;GO:0034135 regulation of toll-like receptor 2 signaling pathway;GO:0034134 toll-like receptor 2 signaling pathway		ENZYME proteins:Transferases; Predicted intracellular proteins; Enzymes	Intermediate filaments (reliability'])				1	0	1	0	0	0	0	0	0	0	0	0	0	0	0	0	0	0	0	0	2
23352	Ubr4	1	1	23352	Gene_ID	H. sapiens	23352	H. sapiens	UBR4	ubiquitin protein ligase E3 component n-recognin 4	GO:0043312 neutrophil degranulation;GO:0002283 neutrophil activation involved in immune response;GO:0002446 neutrophil mediated immunity		ENZYME proteins:Transferases; Predicted intracellular proteins; Enzymes	Nucleoplasm (reliability']); Additional: Centrosome;Cytosol	Verpasep caltespen; PCL-016			1	0	0	0	0	0	0	0	0	0	0	0	0	0	0	0	0	0	0	0	2
2170	Fabp3	1	1	2170	Gene_ID	H. sapiens	2170	H. sapiens	FABP3	fatty acid binding protein 3	GO:0140214 positive regulation of long-chain fatty acid import into cell;GO:0140212 regulation of long-chain fatty acid import into cell;GO:2001245 regulation of phosphatidylcholine biosynthetic process		Candidate cardiovascular disease genes; Predicted intracellular proteins	Focal adhesion sites (reliability']); Additional: Golgi apparatus;Plasma membrane			(M5909)HALLMARK MYOGENESIS	0	0	0	1	0	0	0	0	1	0	1	0	0	0	0	0	0	0	0	0	2
4716	Ndufb10	1	1	4716	Gene_ID	H. sapiens	4716	H. sapiens	NDUFB10	NADH:ubiquinone oxidoreductase subunit B10	GO:0006120 mitochondrial electron transport, NADH to ubiquinone;GO:0010257 NADH dehydrogenase complex assembly;GO:0032981 mitochondrial respiratory chain complex I assembly		Predicted intracellular proteins		NADH			0	1	0	1	0	0	0	0	0	0	0	0	0	0	0	0	0	0	0	0	2
23670	Tmem2	1	1	23670	Gene_ID	H. sapiens	23670	H. sapiens	CEMIP2	cell migration inducing hyaluronidase 2	GO:0030214 hyaluronan catabolic process;GO:0030212 hyaluronan metabolic process;GO:0006027 glycosaminoglycan catabolic process		ENZYME proteins:Hydrolases; Predicted intracellular proteins; Enzymes	Plasma membrane (reliability']); Additional: Vesicles				0	0	0	0	1	0	0	0	0	0	0	0	0	0	0	0	0	0	0	0	2
29123	Ankrd11	1	1	29123	Gene_ID	H. sapiens	29123	H. sapiens	ANKRD11	ankyrin repeat domain 11	GO:0060325 face morphogenesis;GO:0060323 head morphogenesis;GO:0060324 face development		Disease related genes; Predicted intracellular proteins	Nucleoplasm (reliability']); Additional: Cytosol;Plasma membrane				0	0	0	0	0	0	0	0	0	0	0	0	0	0	0	0	0	0	0	0	2
199	Aif1	1	1	199	Gene_ID	H. sapiens	199	H. sapiens	AIF1	allograft inflammatory factor 1	GO:0014739 positive regulation of muscle hyperplasia;GO:0014738 regulation of muscle hyperplasia;GO:0071673 positive regulation of smooth muscle cell chemotaxis		Predicted intracellular proteins	Cytosol (reliability'])				1	0	1	0	0	1	1	1	1	1	0	1	0	0	0	0	0	0	1	1	2
894	Ccnd2	1	1	894	Gene_ID	H. sapiens	894	H. sapiens	CCND2	cyclin D2	GO:0045737 positive regulation of cyclin-dependent protein serine/threonine kinase activity;GO:1904031 positive regulation of cyclin-dependent protein kinase activity;GO:1900087 positive regulation of G1/S transition of mitotic cell cycle		Cancer-related genes:Candidate cancer biomarkers; Disease related genes; Predicted intracellular proteins	Nucleoplasm (reliability'])		(M234)PID IL2 STAT5 PATHWAY; (M279)PID RB 1PATHWAY; (M66)PID MYC ACTIV PATHWAY	(M5944)HALLMARK ANGIOGENESIS; (M5895)HALLMARK WNT BETA CATENIN SIGNALING; (M5902)HALLMARK APOPTOSIS	0	0	0	0	0	0	0	0	0	0	0	0	0	0	0	0	0	0	0	0	2
4782	Nfic	1	1	4782	Gene_ID	H. sapiens	4782	H. sapiens	NFIC	nuclear factor I C	GO:0042475 odontogenesis of dentin-containing tooth;GO:0042476 odontogenesis;GO:0006260 DNA replication		Transcription factors:beta-Hairpin exposed by an alpha/beta-scaffold; Predicted intracellular proteins	Nucleoli fibrillar center;Nucleoplasm (reliability'])		(M285)PID HNF3A PATHWAY		0	0	0	0	0	0	0	0	0	0	0	0	0	0	0	0	0	0	0	0	2
63893	Ube2o	1	1	63893	Gene_ID	H. sapiens	63893	H. sapiens	UBE2O	ubiquitin conjugating enzyme E2 O	GO:0030513 positive regulation of BMP signaling pathway;GO:0070534 protein K63-linked ubiquitination;GO:0006513 protein monoubiquitination		ENZYME proteins:Transferases; Predicted intracellular proteins; Enzymes	Nucleoplasm (reliability']); Additional: Nuclear bodies				0	0	0	0	0	0	0	0	0	0	0	0	0	1	0	0	0	0	0	0	2
9145	Syngr1	1	1	9145	Gene_ID	H. sapiens	9145	H. sapiens	SYNGR1	synaptogyrin 1	GO:0048499 synaptic vesicle membrane organization;GO:0048172 regulation of short-term neuronal synaptic plasticity;GO:0048169 regulation of long-term neuronal synaptic plasticity			Cytosol (reliability'])			(M5906)HALLMARK ESTROGEN RESPONSE EARLY	1	0	0	0	0	0	0	0	0	0	0	0	0	0	0	0	0	0	0	0	2
3557	Il1rn	1	1	3557	Gene_ID	H. sapiens	3557	H. sapiens	IL1RN	interleukin 1 receptor antagonist	GO:2000660 negative regulation of interleukin-1-mediated signaling pathway;GO:2000659 regulation of interleukin-1-mediated signaling pathway;GO:0034115 negative regulation of heterotypic cell-cell adhesion		Predicted intracellular proteins; Disease related genes; Cancer-related genes:Candidate cancer biomarkers; Predicted secreted proteins; Candidate cardiovascular disease genes	Nucleoplasm (reliability']); Additional: Centrosome;Cytosol	Rilonacept	(M110)PID IL1 PATHWAY; (M5883)NABA SECRETED FACTORS; (M5885)NABA MATRISOME ASSOCIATED		0	0	1	0	0	0	0	0	0	1	0	1	0	0	1	1	0	0	1	0	2
84034	Emilin2	1	1	84034	Gene_ID	H. sapiens	84034	H. sapiens	EMILIN2	elastin microfibril interfacer 2	GO:0007155 cell adhesion;GO:0022610 biological adhesion;GO:0008150 biological_process		Predicted secreted proteins			(M3008)NABA ECM GLYCOPROTEINS; (M5884)NABA CORE MATRISOME; (M5889)NABA MATRISOME		0	0	0	0	0	0	0	0	0	0	0	0	1	0	0	0	0	0	0	0	2
788	Slc25a20	1	1	788	Gene_ID	H. sapiens	788	H. sapiens	SLC25A20	solute carrier family 25 member 20	GO:0006844 acyl carnitine transport;GO:1902616 acyl carnitine transmembrane transport;GO:0006853 carnitine shuttle		Potential drug targets; Disease related genes; Predicted intracellular proteins; Transporters:Electrochemical Potential-driven transporters	Cytosol;Mitochondria (reliability'])	Levocarnitine		(M5936)HALLMARK OXIDATIVE PHOSPHORYLATION	0	1	0	0	0	0	0	0	0	0	1	0	0	0	0	0	0	0	0	0	2
10632	Atp5l	1	1	10632	Gene_ID	H. sapiens	10632	H. sapiens	ATP5MG	ATP synthase membrane subunit g	GO:0042776 mitochondrial ATP synthesis coupled proton transport;GO:0015985 energy coupled proton transport, down electrochemical gradient;GO:0015986 ATP synthesis coupled proton transport		Predicted intracellular proteins	Mitochondria (reliability'])	Artenimol; Phenethyl Isothiocyanate		(M5936)HALLMARK OXIDATIVE PHOSPHORYLATION	0	1	0	1	0	0	0	0	0	0	0	0	0	0	0	0	0	0	0	0	2
79094	Chac1	1	1	79094	Gene_ID	H. sapiens	79094	H. sapiens	CHAC1	ChaC glutathione specific gamma-glutamylcyclotransferase 1	GO:0006751 glutathione catabolic process;GO:0006750 glutathione biosynthetic process;GO:0019184 nonribosomal peptide biosynthetic process		ENZYME proteins:Lyases; Predicted intracellular proteins; Enzymes	Mitochondria (reliability'])			(M5922)HALLMARK UNFOLDED PROTEIN RESPONSE	0	0	0	1	0	0	0	0	0	0	0	0	0	0	0	0	0	0	0	0	2
10537	Ubd	1	1	10537	Gene_ID	H. sapiens	10537	H. sapiens	UBD	ubiquitin D	GO:0070842 aggresome assembly;GO:0043011 myeloid dendritic cell differentiation;GO:0070841 inclusion body assembly		Predicted intracellular proteins	Nucleoplasm (reliability']); Additional: Nucleoli fibrillar center				1	0	0	0	0	0	0	0	0	0	0	0	0	0	0	1	0	0	0	0	2
148523	Ciart	1	1	148523	Gene_ID	H. sapiens	148523	H. sapiens	CIART	circadian associated repressor of transcription	GO:0045475 locomotor rhythm;GO:0048512 circadian behavior;GO:0007622 rhythmic behavior		Predicted intracellular proteins	Nucleoplasm (reliability'])				0	0	0	0	0	0	0	0	0	0	0	0	0	0	0	0	0	0	0	0	2
1376	Cpt2	1	1	1376	Gene_ID	H. sapiens	1376	H. sapiens	CPT2	carnitine palmitoyltransferase 2	GO:0006853 carnitine shuttle;GO:1902001 fatty acid transmembrane transport;GO:0032365 intracellular lipid transport		Predicted intracellular proteins; FDA approved drug targets:Small molecule drugs; Disease related genes; Enzymes; ENZYME proteins:Transferases	Mitochondria;Nucleoli;Nucleoplasm (reliability'])	Levocarnitine; Perhexiline		(M5935)HALLMARK FATTY ACID METABOLISM; (M5905)HALLMARK ADIPOGENESIS	0	1	0	0	0	0	0	0	0	0	1	0	0	0	0	0	0	0	0	0	2
93099	Dmkn	1	1	93099	Gene_ID	H. sapiens	93099	H. sapiens	DMKN	dermokine	GO:1903575 cornified envelope assembly;GO:0071709 membrane assembly;GO:0044091 membrane biogenesis		Predicted secreted proteins; Predicted intracellular proteins	Cytosol;Nucleoplasm (reliability'])				0	0	0	0	0	0	0	0	0	0	0	0	0	0	0	0	0	0	0	0	2
3162	Hmox1	1	1	3162	Gene_ID	H. sapiens	3162	H. sapiens	HMOX1	heme oxygenase 1	GO:0032764 negative regulation of mast cell cytokine production;GO:0006788 heme oxidation;GO:0014806 smooth muscle hyperplasia		ENZYME proteins:Oxidoreductases; Predicted intracellular proteins; Disease related genes; Cancer-related genes:Candidate cancer biomarkers; Enzymes; Potential drug targets	Golgi apparatus;Plasma membrane (reliability'])	NADH; Formic acid; Biliverdine IX Alpha; 12-Phenylheme; 2-Phenylheme; Verdoheme; Stannsoporfin; 1-({2-[2-(4-CHLOROPHENYL)ETHYL]-1,3-DIOXOLAN-2-YL}METHYL)-1H-IMIDAZOLE; 1-(adamantan-1-yl)-2-(1H-imidazol-1-yl)ethanone	(M65)PID FRA PATHWAY; (M255)PID HIF1 TFPATHWAY	(M5897)HALLMARK IL6 JAK STAT3 SIGNALING; (M5941)HALLMARK UV RESPONSE UP; (M5902)HALLMARK APOPTOSIS	1	0	1	1	1	1	1	0	0	0	0	1	0	0	1	0	1	0	1	1	2
58	Acta1	1	1	58	Gene_ID	H. sapiens	58	H. sapiens	ACTA1	actin alpha 1, skeletal muscle	GO:0043503 skeletal muscle fiber adaptation;GO:0090131 mesenchyme migration;GO:0030240 skeletal muscle thin filament assembly		Disease related genes; Predicted intracellular proteins		Latrunculin A; Sucrose; Ulapualide A; Kabiramide C; Jaspisamide A; Tmr; 1-Methylhistidine; Phosphoaminophosphonic Acid-Adenylate Ester; Aplyronine A; Reidispongiolide A; Reidispongiolide C; Sphinxolide B; Latrunculin B	(M12)PID RHOA PATHWAY; (M220)PID CASPASE PATHWAY; (M281)PID FAK PATHWAY	(M5909)HALLMARK MYOGENESIS; (M5915)HALLMARK APICAL JUNCTION	0	0	0	0	0	0	1	1	1	1	0	0	0	0	0	0	1	1	0	0	2
1106	Chd2	1	1	1106	Gene_ID	H. sapiens	1106	H. sapiens	CHD2	chromodomain helicase DNA binding protein 2	GO:0060218 hematopoietic stem cell differentiation;GO:0032508 DNA duplex unwinding;GO:0032392 DNA geometric change		Predicted intracellular proteins; Disease related genes; ENZYME proteins:Hydrolases; Enzymes; Potential drug targets	Nucleoplasm (reliability'])				0	0	0	0	0	0	0	0	0	0	0	0	0	0	0	0	0	1	0	0	2
9370	Adipoq	1	1	9370	Gene_ID	H. sapiens	9370	H. sapiens	ADIPOQ	adiponectin, C1Q and collagen domain containing	GO:0070994 detection of oxidative stress;GO:2000477 regulation of metanephric glomerular visceral epithelial cell development;GO:2000478 positive regulation of metanephric glomerular visceral epithelial cell development		Transporters:Accessory Factors Involved in Transport; Disease related genes; Predicted secreted proteins; Potential drug targets; Candidate cardiovascular disease genes			(M3008)NABA ECM GLYCOPROTEINS; (M5884)NABA CORE MATRISOME; (M5889)NABA MATRISOME	(M5905)HALLMARK ADIPOGENESIS	0	1	1	0	0	0	0	0	1	1	1	0	0	0	1	1	0	0	1	0	2
6390	Sdhb	1	1	6390	Gene_ID	H. sapiens	6390	H. sapiens	SDHB	succinate dehydrogenase complex iron sulfur subunit B	GO:0006105 succinate metabolic process;GO:0006099 tricarboxylic acid cycle;GO:0006101 citrate metabolic process		ENZYME proteins:Oxidoreductases; Predicted intracellular proteins; Disease related genes; Cancer-related genes; Enzymes; Potential drug targets; Citric acid cycle related proteins	Mitochondria (reliability']); Additional: Nucleoplasm;Plasma membrane	2-Hexyloxy-6-Hydroxymethyl-Tetrahydro-Pyran-3,4,5-Triol; Ubiquinone Q1		(M5905)HALLMARK ADIPOGENESIS; (M5936)HALLMARK OXIDATIVE PHOSPHORYLATION	0	1	0	0	0	0	0	0	0	0	0	0	0	0	0	0	0	0	0	0	2
2316	Flna	1	1	2316	Gene_ID	H. sapiens	2316	H. sapiens	FLNA	filamin A	GO:1905000 regulation of membrane repolarization during atrial cardiac muscle cell action potential;GO:0021943 formation of radial glial scaffolds;GO:0097368 establishment of Sertoli cell barrier		Potential drug targets; Transporters:Accessory Factors Involved in Transport; Disease related genes; Predicted intracellular proteins	Actin filaments;Cytosol;Plasma membrane (reliability'])	Artenimol	(M23)PID WNT NONCANONICAL PATHWAY; (M16801)SIG REGULATION OF THE ACTIN CYTOSKELETON BY RHO GTPASES; (M34)PID TCR PATHWAY	(M5893)HALLMARK MITOTIC SPINDLE; (M5930)HALLMARK EPITHELIAL MESENCHYMAL TRANSITION; (M5950)HALLMARK ALLOGRAFT REJECTION	1	0	1	0	0	1	1	1	0	0	0	0	0	0	0	0	0	0	1	1	2
23076	Rrp1b	1	1	23076	Gene_ID	H. sapiens	23076	H. sapiens	RRP1B	ribosomal RNA processing 1B	GO:0043923 positive regulation by host of viral transcription;GO:0043921 modulation by host of viral transcription;GO:0052472 modulation by host of symbiont transcription		Predicted intracellular proteins	Nucleoli (reliability']); Additional: Nucleoplasm				0	0	0	0	0	0	0	0	0	0	0	0	0	0	0	0	0	0	0	0	2
57178	Zmiz1	1	1	57178	Gene_ID	H. sapiens	57178	H. sapiens	ZMIZ1	zinc finger MIZ-type containing 1	GO:0021852 pyramidal neuron migration;GO:0007296 vitellogenesis;GO:0021860 pyramidal neuron development		Predicted intracellular proteins	Nucleoplasm;Vesicles (reliability'])		(M58)PID AR PATHWAY	(M5908)HALLMARK ANDROGEN RESPONSE; (M5942)HALLMARK UV RESPONSE DN	0	0	1	0	1	0	0	0	1	1	0	0	0	1	0	0	0	0	0	0	2
1628	Dbp	1	1	1628	Gene_ID	H. sapiens	1628	H. sapiens	DBP	D-box binding PAR bZIP transcription factor	GO:0001889 liver development;GO:0061008 hepaticobiliary system development;GO:0007623 circadian rhythm		Transcription factors:Basic domains; Predicted intracellular proteins				(M5942)HALLMARK UV RESPONSE DN	0	0	0	0	0	0	0	0	0	0	0	0	0	0	0	0	0	0	0	0	2
37	Acadvl	1	1	37	Gene_ID	H. sapiens	37	H. sapiens	ACADVL	acyl-CoA dehydrogenase very long chain	GO:0033539 fatty acid beta-oxidation using acyl-CoA dehydrogenase;GO:0046322 negative regulation of fatty acid oxidation;GO:0045717 negative regulation of fatty acid biosynthetic process		ENZYME proteins:Oxidoreductases; Predicted intracellular proteins; Disease related genes; Enzymes; Potential drug targets	Mitochondria;Nucleoli (reliability']); Additional: Cytosol;Nucleoplasm		(M106)PID HNF3B PATHWAY	(M5935)HALLMARK FATTY ACID METABOLISM; (M5936)HALLMARK OXIDATIVE PHOSPHORYLATION	0	1	0	0	0	0	0	0	0	0	1	0	0	0	0	0	0	0	0	0	2
6311	Atxn2	1	1	6311	Gene_ID	H. sapiens	6311	H. sapiens	ATXN2	ataxin 2	GO:0010603 regulation of cytoplasmic mRNA processing body assembly;GO:0002091 negative regulation of receptor internalization;GO:0033962 cytoplasmic mRNA processing body assembly		Disease related genes; Predicted intracellular proteins	Cytosol (reliability'])			(M5892)HALLMARK CHOLESTEROL HOMEOSTASIS	0	0	0	0	0	0	0	0	0	0	0	0	0	0	0	0	0	0	0	0	2
4659	Ppp1r12a	1	1	4659	Gene_ID	H. sapiens	4659	H. sapiens	PPP1R12A	protein phosphatase 1 regulatory subunit 12A	GO:0035508 positive regulation of myosin-light-chain-phosphatase activity;GO:0035507 regulation of myosin-light-chain-phosphatase activity;GO:1901550 regulation of endothelial cell development		Predicted intracellular proteins	Actin filaments;Cytosol (reliability'])		(M12)PID RHOA PATHWAY; (M71)PID ILK PATHWAY; (M129)PID PLK1 PATHWAY		0	0	1	0	0	0	0	0	0	0	0	0	0	0	0	0	0	0	0	0	2
51341	Zbtb7a	1	1	51341	Gene_ID	H. sapiens	51341	H. sapiens	ZBTB7A	zinc finger and BTB domain containing 7A	GO:0097680 double-strand break repair via classical nonhomologous end joining;GO:0060766 negative regulation of androgen receptor signaling pathway;GO:0043249 erythrocyte maturation		Transcription factors:Zinc-coordinating DNA-binding domains; Predicted intracellular proteins	Nucleoplasm (reliability'])				0	1	1	1	0	0	0	0	1	1	1	0	0	1	0	0	0	0	0	0	2
26140	Ttll3	1	1	26140	Gene_ID	H. sapiens	26140	H. sapiens	TTLL3	tubulin tyrosine ligase like 3	GO:0018094 protein polyglycylation;GO:0018200 peptidyl-glutamic acid modification;GO:0035082 axoneme assembly		Predicted intracellular proteins		Theophylline			0	0	0	0	0	0	0	0	0	0	0	0	0	0	0	0	0	0	0	0	2
144363	Lyrm5	1	1	144363	Gene_ID	H. sapiens	144363	H. sapiens	ETFRF1	electron transfer flavoprotein regulatory factor 1	GO:0022904 respiratory electron transport chain;GO:0022900 electron transport chain;GO:0045333 cellular respiration		Predicted intracellular proteins					0	1	0	0	0	0	0	0	0	0	0	0	0	0	0	0	0	0	0	0	2
6949	Tcof1	1	1	6949	Gene_ID	H. sapiens	6949	H. sapiens	TCOF1	treacle ribosome biogenesis factor 1	GO:0014029 neural crest formation;GO:0042790 nucleolar large rRNA transcription by RNA polymerase I;GO:0009303 rRNA transcription		Disease related genes; Predicted intracellular proteins	Nucleoli fibrillar center (reliability'])			(M5928)HALLMARK MYC TARGETS V2	0	0	0	0	0	0	0	0	0	0	0	0	0	0	0	0	0	0	0	0	2
7381	Uqcrb	1	1	7381	Gene_ID	H. sapiens	7381	H. sapiens	UQCRB	ubiquinol-cytochrome c reductase binding protein	GO:0017062 respiratory chain complex III assembly;GO:0034551 mitochondrial respiratory chain complex III assembly;GO:0006122 mitochondrial electron transport, ubiquinol to cytochrome c		Disease related genes; Predicted intracellular proteins		2-Hexyloxy-6-Hydroxymethyl-Tetrahydro-Pyran-3,4,5-Triol; 6-Hydroxy-5-undecyl-4,7-benzothiazoledione; Azoxystrobin; 5-Heptyl-6-hydroxy-1,3-benzothiazole-4,7-dione; (5S)-3-ANILINO-5-(2,4-DIFLUOROPHENYL)-5-METHYL-1,3-OXAZOLIDINE-2,4-DIONE; (S)-famoxadone; METHYL (2Z)-3-METHOXY-2-{2-[(E)-2-PHENYLVINYL]PHENYL}ACRYLATE; 2-Nonyl-4-quinolinol 1-oxide; Ubiquinone Q2		(M5936)HALLMARK OXIDATIVE PHOSPHORYLATION	0	1	0	1	0	0	1	0	0	0	0	0	0	0	0	0	0	0	0	0	2
63924	Cidec	1	1	63924	Gene_ID	H. sapiens	63924	H. sapiens	CIDEC	cell death inducing DFFA like effector c	GO:0034389 lipid droplet organization;GO:0097194 execution phase of apoptosis;GO:0042981 regulation of apoptotic process		Disease related genes; Predicted intracellular proteins					0	0	0	0	0	0	0	0	0	0	1	0	0	0	0	0	0	0	0	0	2
84196	Usp48	1	1	84196	Gene_ID	H. sapiens	84196	H. sapiens	USP48	ubiquitin specific peptidase 48	GO:0016579 protein deubiquitination;GO:0070646 protein modification by small protein removal;GO:0006511 ubiquitin-dependent protein catabolic process		ENZYME proteins:Hydrolases; Peptidases:Cysteine-type peptidases; Predicted intracellular proteins; Enzymes	Nucleoplasm (reliability']); Additional: Cytosol;Mitochondria				0	0	0	0	0	0	0	0	0	0	0	0	0	0	0	0	0	0	0	0	2
57459	Gatad2b	1	1	57459	Gene_ID	H. sapiens	57459	H. sapiens	GATAD2B	GATA zinc finger domain containing 2B	GO:0043044 ATP-dependent chromatin remodeling;GO:0006338 chromatin remodeling;GO:0006325 chromatin organization		Disease related genes; Transcription factors:Zinc-coordinating DNA-binding domains; Predicted intracellular proteins	Nucleoplasm (reliability'])		(M101)PID HDAC CLASSI PATHWAY		0	0	0	0	0	0	0	0	0	0	0	0	0	0	0	0	0	0	0	0	2
6576	Slc25a1	1	1	6576	Gene_ID	H. sapiens	6576	H. sapiens	SLC25A1	solute carrier family 25 member 1	GO:0006843 mitochondrial citrate transmembrane transport;GO:1990546 mitochondrial tricarboxylic acid transmembrane transport;GO:0035674 tricarboxylic acid transmembrane transport		Potential drug targets; Disease related genes; Predicted intracellular proteins; Transporters:Electrochemical Potential-driven transporters				(M5891)HALLMARK HYPOXIA; (M5905)HALLMARK ADIPOGENESIS	0	0	0	1	0	0	0	0	0	0	1	0	0	0	0	0	0	0	0	0	2
50	Aco2	1	1	50	Gene_ID	H. sapiens	50	H. sapiens	ACO2	aconitase 2	GO:0006102 isocitrate metabolic process;GO:0035900 response to isolation stress;GO:0006099 tricarboxylic acid cycle		Predicted intracellular proteins; Disease related genes; ENZYME proteins:Lyases; Enzymes; Potential drug targets; Citric acid cycle related proteins	Mitochondria (reliability'])	Isocitric Acid; 4-Hydroxy-Aconitate Ion; Alpha-Methylisocitric Acid; Aconitate Ion; Tricarballylic acid		(M5935)HALLMARK FATTY ACID METABOLISM; (M5905)HALLMARK ADIPOGENESIS; (M5934)HALLMARK XENOBIOTIC METABOLISM	0	1	0	0	0	0	0	0	0	0	0	0	0	0	0	0	0	0	0	0	2
2353	Fos	1	1	2353	Gene_ID	H. sapiens	2353	H. sapiens	FOS	Fos proto-oncogene, AP-1 transcription factor subunit	GO:0001661 conditioned taste aversion;GO:0009629 response to gravity;GO:0035994 response to muscle stretch		Transcription factors:Basic domains; Cancer-related genes:Candidate cancer biomarkers; Predicted intracellular proteins	Nucleoplasm (reliability'])	Nadroparin	(M134)PID TCR RAS PATHWAY; (M206)PID PDGFRA PATHWAY; (M17200)SA B CELL RECEPTOR COMPLEXES	(M5941)HALLMARK UV RESPONSE UP; (M5890)HALLMARK TNFA SIGNALING VIA NFKB; (M5891)HALLMARK HYPOXIA	0	0	0	0	0	0	0	0	1	1	0	0	0	1	0	1	1	1	0	0	2
338442	Hcar2	1	1	338442	Gene_ID	H. sapiens	338442	H. sapiens	HCAR2	hydroxycarboxylic acid receptor 2	GO:0070165 positive regulation of adiponectin secretion;GO:0033031 positive regulation of neutrophil apoptotic process;GO:0070162 adiponectin secretion		FDA approved drug targets:Small molecule drugs; G-protein coupled receptors:GPCRs excl olfactory receptors	Cell Junctions (reliability'])	Clotrimazole; Niacin; Inositol nicotinate			0	0	0	0	0	0	0	0	0	0	0	0	0	0	0	0	0	0	1	0	2
28992	Macrod1	1	1	28992	Gene_ID	H. sapiens	28992	H. sapiens	MACROD1	mono-ADP ribosylhydrolase 1	GO:0051725 protein de-ADP-ribosylation;GO:0042278 purine nucleoside metabolic process;GO:0009116 nucleoside metabolic process		Disease related genes; Predicted intracellular proteins	Nucleoplasm (reliability'])				0	0	0	1	0	0	0	0	0	0	0	0	0	0	0	0	0	0	0	0	2
26521	Timm8b	1	1	26521	Gene_ID	H. sapiens	26521	H. sapiens	TIMM8B	translocase of inner mitochondrial membrane 8 homolog B	GO:0072321 chaperone-mediated protein transport;GO:0006626 protein targeting to mitochondrion;GO:0072655 establishment of protein localization to mitochondrion		Predicted intracellular proteins				(M5936)HALLMARK OXIDATIVE PHOSPHORYLATION	0	1	0	0	0	0	0	0	0	0	0	0	0	0	0	0	0	0	0	0	2
80212	Ccdc92	1	1	80212	Gene_ID	H. sapiens	80212	H. sapiens	CCDC92	coiled-coil domain containing 92			Predicted intracellular proteins	Centrosome (reliability']); Additional: Nucleoplasm				0	0	0	0	0	0	0	0	0	0	0	0	0	0	0	0	0	0	0	0	2
91543	Rsad2	1	1	91543	Gene_ID	H. sapiens	91543	H. sapiens	RSAD2	radical S-adenosyl methionine domain containing 2	GO:0034157 positive regulation of toll-like receptor 7 signaling pathway;GO:0034165 positive regulation of toll-like receptor 9 signaling pathway;GO:0034155 regulation of toll-like receptor 7 signaling pathway		Predicted intracellular proteins	Endoplasmic reticulum (reliability']); Additional: Nucleoli fibrillar center			(M5911)HALLMARK INTERFERON ALPHA RESPONSE; (M5913)HALLMARK INTERFERON GAMMA RESPONSE; (M5956)HALLMARK KRAS SIGNALING DN	0	0	1	0	0	0	0	0	0	0	0	0	0	0	0	0	0	0	1	0	2
80781	Col18a1	1	1	80781	Gene_ID	H. sapiens	80781	H. sapiens	COL18A1	collagen type XVIII alpha 1 chain	GO:0051599 response to hydrostatic pressure;GO:0001886 endothelial cell morphogenesis;GO:0009415 response to water		Predicted intracellular proteins; Disease related genes; Cancer-related genes:Candidate cancer biomarkers; Cancer-related genes:Mutational cancer driver genes; Predicted secreted proteins	Golgi apparatus (reliability'])		(M5887)NABA BASEMENT MEMBRANES; (M285)PID HNF3A PATHWAY; (M3005)NABA COLLAGENS		0	0	0	0	1	1	0	0	0	0	0	0	1	0	0	0	1	0	0	0	2
4731	Ndufv3	1	1	4731	Gene_ID	H. sapiens	4731	H. sapiens	NDUFV3	NADH:ubiquinone oxidoreductase subunit V3	GO:0006120 mitochondrial electron transport, NADH to ubiquinone;GO:0010257 NADH dehydrogenase complex assembly;GO:0032981 mitochondrial respiratory chain complex I assembly		FDA approved drug targets:Small molecule drugs; Predicted intracellular proteins	Mitochondria (reliability'])	NADH; Ubidecarenone	(M285)PID HNF3A PATHWAY; (M200)PID ERA GENOMIC PATHWAY	(M5937)HALLMARK GLYCOLYSIS	0	1	0	1	0	0	0	0	0	0	0	0	0	0	0	0	0	0	0	0	2
120224	Tmem45b	1	1	120224	Gene_ID	H. sapiens	120224	H. sapiens	TMEM45B	transmembrane protein 45B				Nucleoplasm (reliability'])				0	0	0	0	0	0	0	0	0	0	0	0	0	0	0	0	0	0	0	0	2
338339	Clec4d	1	1	338339	Gene_ID	H. sapiens	338339	H. sapiens	CLEC4D	C-type lectin domain family 4 member D	GO:0030887 positive regulation of myeloid dendritic cell activation;GO:0030885 regulation of myeloid dendritic cell activation;GO:0001773 myeloid dendritic cell activation		Predicted intracellular proteins			(M5880)NABA ECM AFFILIATED; (M5885)NABA MATRISOME ASSOCIATED; (M5889)NABA MATRISOME		1	0	1	0	0	0	0	0	0	0	0	0	0	0	0	1	0	0	0	0	2
1524	Cx3cr1	1	1	1524	Gene_ID	H. sapiens	1524	H. sapiens	CX3CR1	C-X3-C motif chemokine receptor 1	GO:0150089 multiple spine synapse organization;GO:0150090 multiple spine synapse organization, single dendrite;GO:0110091 negative regulation of hippocampal neuron apoptotic process		Potential drug targets; Disease related genes; G-protein coupled receptors:GPCRs excl olfactory receptors; G-protein coupled receptors:Chemokines and chemotactic factors receptors					0	0	1	0	1	1	0	0	0	1	0	1	0	1	0	1	0	0	0	1	2
1149	Cidea	1	1	1149	Gene_ID	H. sapiens	1149	H. sapiens	CIDEA	cell death inducing DFFA like effector a	GO:0035634 response to stilbenoid;GO:0010890 positive regulation of sequestering of triglyceride;GO:0070417 cellular response to cold		Disease related genes; Predicted intracellular proteins				(M5935)HALLMARK FATTY ACID METABOLISM; (M5905)HALLMARK ADIPOGENESIS; (M5953)HALLMARK KRAS SIGNALING UP	0	0	0	0	0	0	0	0	0	0	1	0	0	1	0	0	0	0	1	0	2
5008	Osm	1	1	5008	Gene_ID	H. sapiens	5008	H. sapiens	OSM	oncostatin M	GO:0038165 oncostatin-M-mediated signaling pathway;GO:0032740 positive regulation of interleukin-17 production;GO:0002675 positive regulation of acute inflammatory response		Cancer-related genes:Candidate cancer biomarkers; Predicted secreted proteins; Predicted intracellular proteins			(M182)PID IL3 PATHWAY; (M22)PID GMCSF PATHWAY; (M5883)NABA SECRETED FACTORS	(M5932)HALLMARK INFLAMMATORY RESPONSE	0	0	0	0	0	0	0	0	0	0	0	1	0	0	0	0	0	0	1	0	2
644096	Sdhaf1	1	1	644096	Gene_ID	H. sapiens	644096	H. sapiens	SDHAF1	succinate dehydrogenase complex assembly factor 1	GO:0034552 respiratory chain complex II assembly;GO:0034553 mitochondrial respiratory chain complex II assembly;GO:0033108 mitochondrial respiratory chain complex assembly		Disease related genes; Predicted intracellular proteins	Mitochondria (reliability'])				0	1	0	0	0	0	0	0	0	0	0	0	0	0	0	0	0	0	0	0	2
2819	Gpd1	1	1	2819	Gene_ID	H. sapiens	2819	H. sapiens	GPD1	glycerol-3-phosphate dehydrogenase 1	GO:0006127 glycerophosphate shuttle;GO:0046168 glycerol-3-phosphate catabolic process;GO:0006116 NADH oxidation		ENZYME proteins:Oxidoreductases; Predicted intracellular proteins; Disease related genes; Enzymes; Potential drug targets		NADH; Metformin		(M5935)HALLMARK FATTY ACID METABOLISM	0	1	0	1	0	0	0	0	1	1	1	0	0	0	0	1	0	0	0	0	2
4709	Ndufb3	1	1	4709	Gene_ID	H. sapiens	4709	H. sapiens	NDUFB3	NADH:ubiquinone oxidoreductase subunit B3	GO:0006120 mitochondrial electron transport, NADH to ubiquinone;GO:0010257 NADH dehydrogenase complex assembly;GO:0032981 mitochondrial respiratory chain complex I assembly		Disease related genes; Predicted intracellular proteins		NADH		(M5936)HALLMARK OXIDATIVE PHOSPHORYLATION	0	1	0	1	0	0	0	0	0	0	0	0	0	0	0	0	0	0	0	0	2
387893	Kmt5a	1	1	387893	Gene_ID	H. sapiens	387893	H. sapiens	KMT5A	lysine methyltransferase 5A	GO:0018026 peptidyl-lysine monomethylation;GO:0034770 histone H4-K20 methylation;GO:0043516 regulation of DNA damage response, signal transduction by p53 class mediator		ENZYME proteins:Transferases; Predicted intracellular proteins; Enzymes	Nucleoplasm (reliability']); Additional: Cytosol		(M261)PID P53 REGULATION PATHWAY	(M5935)HALLMARK FATTY ACID METABOLISM; (M5901)HALLMARK G2M CHECKPOINT	0	0	0	0	0	0	0	0	0	0	0	0	0	0	0	0	0	0	0	0	2
10724	Mgea5	1	1	10724	Gene_ID	H. sapiens	10724	H. sapiens	OGA	O-GlcNAcase	GO:0006044 N-acetylglucosamine metabolic process;GO:1901071 glucosamine-containing compound metabolic process;GO:0006516 glycoprotein catabolic process		ENZYME proteins:Hydrolases; Predicted intracellular proteins; Enzymes	Cytosol (reliability'])	Streptozocin			0	0	0	1	0	0	0	0	0	0	0	0	0	0	0	0	0	0	0	0	2
8639	Aoc3	1	1	8639	Gene_ID	H. sapiens	8639	H. sapiens	AOC3	amine oxidase copper containing 3	GO:1902283 negative regulation of primary amine oxidase activity;GO:0051354 negative regulation of oxidoreductase activity;GO:0051341 regulation of oxidoreductase activity		ENZYME proteins:Oxidoreductases; Predicted intracellular proteins; FDA approved drug targets:Small molecule drugs; Cancer-related genes:Candidate cancer biomarkers; Predicted secreted proteins; Enzymes	Cytosol (reliability']); Additional: Golgi apparatus	Phenelzine; Hydralazine; 6-hydroxydopa quinone		(M5935)HALLMARK FATTY ACID METABOLISM	0	0	0	0	0	0	0	0	0	0	0	0	0	0	0	0	0	0	0	0	2
6348	Ccl3	1	1	6348	Gene_ID	H. sapiens	6348	H. sapiens	CCL3	C-C motif chemokine ligand 3	GO:2000503 positive regulation of natural killer cell chemotaxis;GO:1904141 positive regulation of microglial cell migration;GO:0002278 eosinophil activation involved in immune response		Cancer-related genes:Candidate cancer biomarkers; Predicted secreted proteins		ROX-888	(M54)PID IL12 2PATHWAY; (M5883)NABA SECRETED FACTORS; (M5885)NABA MATRISOME ASSOCIATED		1	0	1	0	0	1	0	0	0	1	0	1	0	0	1	1	0	0	0	0	2
11185	Inmt	1	1	11185	Gene_ID	H. sapiens	11185	H. sapiens	INMT	indolethylamine N-methyltransferase	GO:0009308 amine metabolic process;GO:0032259 methylation;GO:0009636 response to toxic substance		ENZYME proteins:Transferases; Predicted intracellular proteins; Enzymes	Golgi apparatus;Vesicles (reliability'])			(M5935)HALLMARK FATTY ACID METABOLISM	0	0	0	0	0	0	0	0	0	0	0	0	0	0	0	0	0	0	0	0	2
8673	Vamp8	1	1	8673	Gene_ID	H. sapiens	8673	H. sapiens	VAMP8	vesicle associated membrane protein 8	GO:0016240 autophagosome membrane docking;GO:1903595 positive regulation of histamine secretion by mast cell;GO:0002278 eosinophil activation involved in immune response		Predicted intracellular proteins; Transporters:Transporter channels and pores	Golgi apparatus;Nucleoplasm (reliability'])			(M5913)HALLMARK INTERFERON GAMMA RESPONSE; (M5939)HALLMARK P53 PATHWAY	1	0	1	0	0	0	0	0	0	0	0	1	0	0	0	0	0	0	1	1	2
7086	Tkt	1	1	7086	Gene_ID	H. sapiens	7086	H. sapiens	TKT	transketolase	GO:0005999 xylulose biosynthetic process;GO:0046166 glyceraldehyde-3-phosphate biosynthetic process;GO:0019322 pentose biosynthetic process		Predicted intracellular proteins; Disease related genes; Enzymes; Potential drug targets; ENZYME proteins:Transferases	Nucleoplasm (reliability'])	Copper		(M5905)HALLMARK ADIPOGENESIS	0	0	0	1	0	0	0	0	0	0	0	0	0	0	0	0	0	0	0	0	2
4322	Mmp13	1	1	4322	Gene_ID	H. sapiens	4322	H. sapiens	MMP13	matrix metallopeptidase 13	GO:0003417 growth plate cartilage development;GO:0003416 endochondral bone growth;GO:0001958 endochondral ossification		FDA approved drug targets:Small molecule drugs; Disease related genes; Cancer-related genes:Candidate cancer biomarkers; Predicted secreted proteins; Enzymes; Peptidases:Metallopeptidases		Marimastat; 3-Methylpyridine; 2-{4-[4-(4-Chloro-Phenoxy)-Benzenesulfonyl]-Tetrahydro-Pyran-4-Yl}-N-Hydroxy-Acetamide; WAY-151693; Hydroxyaminovaline; 4-methoxybenzenesulfinate; PYRIMIDINE-4,6-DICARBOXYLIC ACID BIS-(3-METHYL-BENZYLAMIDE); PYRIMIDINE-4,6-DICARBOXYLIC ACID BIS-(4-FLUORO-3-METHYL-BENZYLAMIDE); PYRIMIDINE-4,6-DICARBOXYLIC ACID BIS-[(PYRIDIN-3-YLMETHYL)-AMIDE]; Endostatin; TERT-BUTYL 4…	(M174)PID UPA UPAR PATHWAY; (M3468)NABA ECM REGULATORS; (M5885)NABA MATRISOME ASSOCIATED	(M5921)HALLMARK COMPLEMENT	0	0	0	0	0	0	0	0	1	0	0	0	1	0	0	0	0	0	0	0	2
6432	Srsf7	1	1	6432	Gene_ID	H. sapiens	6432	H. sapiens	SRSF7	serine and arginine rich splicing factor 7	GO:0048025 negative regulation of mRNA splicing, via spliceosome;GO:0033119 negative regulation of RNA splicing;GO:0050686 negative regulation of mRNA processing		Predicted intracellular proteins	Nucleoplasm (reliability'])			(M5926)HALLMARK MYC TARGETS V1	0	0	0	0	0	0	0	0	0	0	0	0	0	0	0	0	0	0	0	0	2
34	Acadm	1	1	34	Gene_ID	H. sapiens	34	H. sapiens	ACADM	acyl-CoA dehydrogenase medium chain	GO:0019254 carnitine metabolic process, CoA-linked;GO:0045329 carnitine biosynthetic process;GO:0051793 medium-chain fatty acid catabolic process		ENZYME proteins:Oxidoreductases; Predicted intracellular proteins; Disease related genes; Enzymes; Potential drug targets	Mitochondria (reliability'])	Octanoyl-Coenzyme A; Flavin adenine dinucleotide; 3-thiaoctanoyl-CoA	(M106)PID HNF3B PATHWAY	(M5935)HALLMARK FATTY ACID METABOLISM; (M5905)HALLMARK ADIPOGENESIS; (M5936)HALLMARK OXIDATIVE PHOSPHORYLATION	0	0	0	0	0	0	0	0	0	0	1	0	0	0	0	0	0	0	0	0	2
55904	Kmt2e	1	1	55904	Gene_ID	H. sapiens	55904	H. sapiens	KMT2E	lysine methyltransferase 2E (inactive)	GO:1905435 regulation of histone H3-K4 trimethylation;GO:1905437 positive regulation of histone H3-K4 trimethylation;GO:0051571 positive regulation of histone H3-K4 methylation		Predicted intracellular proteins	Nucleoplasm (reliability']); Additional: Nuclear bodies;Vesicles				1	0	0	0	0	0	0	0	0	0	0	0	0	0	0	0	0	0	0	0	2
11151	Coro1a	1	1	11151	Gene_ID	H. sapiens	11151	H. sapiens	CORO1A	coronin 1A	GO:0032796 uropod organization;GO:0061502 early endosome to recycling endosome transport;GO:0031339 negative regulation of vesicle fusion		Disease related genes; Predicted intracellular proteins	Cytosol (reliability'])			(M5924)HALLMARK MTORC1 SIGNALING	1	0	1	0	0	1	0	1	0	0	0	1	0	1	0	0	0	0	0	0	2
54476	Rnf216	1	1	54476	Gene_ID	H. sapiens	54476	H. sapiens	RNF216	ring finger protein 216	GO:0099546 protein catabolic process, modulating synaptic transmission;GO:0140246 protein catabolic process at synapse;GO:0050691 regulation of defense response to virus by host		Predicted intracellular proteins; Disease related genes; Enzymes; Potential drug targets; ENZYME proteins:Transferases	Cytosol (reliability']); Additional: Nucleoplasm				0	0	0	0	0	0	0	0	0	0	0	0	0	0	0	0	0	0	0	0	2
6279	S100a8	1	1	6279	Gene_ID	H. sapiens	6279	H. sapiens	S100A8	S100 calcium binding protein A8	GO:0070488 neutrophil aggregation;GO:0035425 autocrine signaling;GO:0032119 sequestering of zinc ion		Cancer-related genes:Candidate cancer biomarkers; Predicted secreted proteins; Predicted intracellular proteins	Intermediate filaments (reliability']); Additional: Cytosol	Calcium; Zinc; Copper; Zinc acetate; Zinc chloride; Zinc sulfate, unspecified form	(M264)PID TOLL ENDOGENOUS PATHWAY; (M5883)NABA SECRETED FACTORS; (M5885)NABA MATRISOME ASSOCIATED		1	0	1	0	0	0	0	1	0	0	0	1	0	0	0	1	1	0	1	1	2
1346	Cox7a1	1	1	1346	Gene_ID	H. sapiens	1346	H. sapiens	COX7A1	cytochrome c oxidase subunit 7A1	GO:0097250 mitochondrial respiratory chain supercomplex assembly;GO:0002082 regulation of oxidative phosphorylation;GO:1903578 regulation of ATP metabolic process		Predicted intracellular proteins; Transporters:Primary Active Transporters		Cholic Acid; N-Formylmethionine		(M5909)HALLMARK MYOGENESIS	0	1	0	1	0	0	1	0	0	0	0	0	0	0	0	0	0	0	0	0	2
9535	Gmfg	1	1	9535	Gene_ID	H. sapiens	9535	H. sapiens	GMFG	glia maturation factor gamma	GO:0071846 actin filament debranching;GO:0034316 negative regulation of Arp2/3 complex-mediated actin nucleation;GO:0051126 negative regulation of actin nucleation		Predicted intracellular proteins	Cytosol;Nucleoplasm (reliability']); Additional: Nuclear bodies				1	0	0	0	0	0	0	1	0	0	0	0	0	0	0	0	0	0	0	0	2
1831	Tsc22d3	1	1	1831	Gene_ID	H. sapiens	1831	H. sapiens	TSC22D3	TSC22 domain family member 3	GO:0070236 negative regulation of activation-induced cell death of T cells;GO:0070235 regulation of activation-induced cell death of T cells;GO:0006924 activation-induced cell death of T cells		Transcription factors:Basic domains; Predicted intracellular proteins	Cytosol (reliability']); Additional: Golgi apparatus;Nuclear speckles				0	0	0	0	0	0	0	0	0	0	0	0	0	0	1	0	0	0	0	0	2
7273	Ttn	1	1	7273	Gene_ID	H. sapiens	7273	H. sapiens	TTN	titin	GO:0030241 skeletal muscle myosin thick filament assembly;GO:0071688 striated muscle myosin thick filament assembly;GO:0048769 sarcomerogenesis	CAMK Ser/Thr protein kinase family	Predicted intracellular proteins; Disease related genes; Enzymes; Potential drug targets; ENZYME proteins:Transferases; Kinases:CAMK Ser/Thr protein kinases					1	0	0	0	0	0	1	1	0	0	0	0	0	0	0	0	1	1	1	0	2
151516	Asprv1	1	1	151516	Gene_ID	H. sapiens	151516	H. sapiens	ASPRV1	aspartic peptidase retroviral like 1	GO:0016485 protein processing;GO:0051604 protein maturation;GO:0043588 skin development							0	0	0	0	0	0	0	0	0	0	0	0	0	0	0	0	0	0	0	0	2
55362	Tmem63b	1	1	55362	Gene_ID	H. sapiens	55362	H. sapiens	TMEM63B	transmembrane protein 63B	GO:0098655 cation transmembrane transport;GO:0034220 ion transmembrane transport;GO:0006812 cation transport		Transporters:Transporter channels and pores	Actin filaments;Plasma membrane (reliability'])				0	0	0	0	0	0	0	0	0	0	0	0	0	0	0	0	0	0	0	0	2
1893	Ecm1	1	1	1893	Gene_ID	H. sapiens	1893	H. sapiens	ECM1	extracellular matrix protein 1	GO:0030502 negative regulation of bone mineralization;GO:0003416 endochondral bone growth;GO:0070168 negative regulation of biomineral tissue development		Disease related genes; Predicted secreted proteins	Cytosol (reliability']); Additional: Nucleoplasm		(M3008)NABA ECM GLYCOPROTEINS; (M5884)NABA CORE MATRISOME; (M5889)NABA MATRISOME	(M5947)HALLMARK IL2 STAT5 SIGNALING; (M5930)HALLMARK EPITHELIAL MESENCHYMAL TRANSITION	1	0	0	0	1	0	0	0	0	0	0	1	0	0	0	0	0	0	0	0	2
6711	Sptbn1	1	1	6711	Gene_ID	H. sapiens	6711	H. sapiens	SPTBN1	spectrin beta, non-erythrocytic 1	GO:0007182 common-partner SMAD protein phosphorylation;GO:0060390 regulation of SMAD protein signal transduction;GO:0032743 positive regulation of interleukin-2 production		Predicted intracellular proteins	Golgi apparatus (reliability'])	Calcium; 1D-myo-inositol 1,4,5-trisphosphate	(M286)PID TGFBR PATHWAY	(M5896)HALLMARK TGF BETA SIGNALING; (M5893)HALLMARK MITOTIC SPINDLE	0	0	0	0	0	0	0	1	0	0	0	1	0	1	0	0	0	0	0	0	2
27245	Ahdc1	1	1	27245	Gene_ID	H. sapiens	27245	H. sapiens	AHDC1	AT-hook DNA binding motif containing 1			Disease related genes; Predicted intracellular proteins	Nucleoplasm (reliability'])				0	0	0	0	0	0	0	0	0	0	0	0	0	0	0	0	0	0	0	0	2
51019	Ccdc53	1	1	51019	Gene_ID	H. sapiens	51019	H. sapiens	WASHC3	WASH complex subunit 3	GO:0030041 actin filament polymerization;GO:0008154 actin polymerization or depolymerization;GO:0051258 protein polymerization		Predicted intracellular proteins	Vesicles (reliability'])				0	0	0	0	0	0	0	1	0	0	0	0	0	0	0	0	0	0	0	0	2
7350	Ucp1	1	1	7350	Gene_ID	H. sapiens	7350	H. sapiens	UCP1	uncoupling protein 1	GO:0070417 cellular response to cold;GO:0002024 diet induced thermogenesis;GO:0002021 response to dietary excess		Transporters:Electrochemical Potential-driven transporters					0	1	0	0	0	0	0	0	1	1	0	0	0	0	0	0	0	0	0	0	2
6280	S100a9	1	1	6280	Gene_ID	H. sapiens	6280	H. sapiens	S100A9	S100 calcium binding protein A9	GO:0035606 peptidyl-cysteine S-trans-nitrosylation;GO:0070488 neutrophil aggregation;GO:0045113 regulation of integrin biosynthetic process		Cancer-related genes:Candidate cancer biomarkers; Predicted secreted proteins; Predicted intracellular proteins	Cell Junctions;Cytosol;Nucleoplasm (reliability'])	Calcium; Zinc; Zinc acetate; Zinc chloride; Zinc sulfate, unspecified form	(M264)PID TOLL ENDOGENOUS PATHWAY; (M5883)NABA SECRETED FACTORS; (M5885)NABA MATRISOME ASSOCIATED	(M5907)HALLMARK ESTROGEN RESPONSE LATE; (M5921)HALLMARK COMPLEMENT	1	0	1	0	0	0	0	1	0	0	0	1	0	0	0	1	0	0	0	0	2
3312	Hspa8	1	1	3312	Gene_ID	H. sapiens	3312	H. sapiens	HSPA8	heat shock protein family A (Hsp70) member 8	GO:1904764 chaperone-mediated autophagy translocation complex disassembly;GO:1990832 slow axonal transport;GO:0061741 chaperone-mediated protein transport involved in chaperone-mediated autophagy		Cancer-related genes:Candidate cancer biomarkers; Cancer-related genes:Mutational cancer driver genes; Predicted intracellular proteins	Nucleoplasm (reliability']); Additional: Vesicles	Dasatinib; (2R,3R,4S,5R)-2-[6-amino-8-[(3,4-dichlorophenyl)methylamino]purin-9-yl]-5-(hydroxymethyl)oxolane-3,4-diol; Copper; Artenimol	(M2)PID SMAD2 3NUCLEAR PATHWAY; (M195)PID CMYB PATHWAY	(M5901)HALLMARK G2M CHECKPOINT	1	0	0	1	0	0	0	1	0	0	0	0	0	0	0	0	0	0	1	0	2
25874	Mpc2	1	1	25874	Gene_ID	H. sapiens	25874	H. sapiens	MPC2	mitochondrial pyruvate carrier 2	GO:0006850 mitochondrial pyruvate transmembrane transport;GO:0006848 pyruvate transport;GO:1901475 pyruvate transmembrane transport		Transporters:Electrochemical Potential-driven transporters; Predicted intracellular proteins				(M5898)HALLMARK DNA REPAIR	0	1	0	1	0	0	0	0	0	0	1	0	0	0	0	0	0	0	1	0	2
51227	Pigp	1	1	51227	Gene_ID	H. sapiens	51227	H. sapiens	PIGP	phosphatidylinositol glycan anchor biosynthesis class P	GO:0016254 preassembly of GPI anchor in ER membrane;GO:0006506 GPI anchor biosynthetic process;GO:0006505 GPI anchor metabolic process		Predicted intracellular proteins; Disease related genes; Enzymes; Potential drug targets; ENZYME proteins:Transferases	Vesicles (reliability'])				0	0	0	1	0	0	0	0	0	0	0	0	0	0	0	0	0	0	0	0	2
3861	Krt14	1	1	3861	Gene_ID	H. sapiens	3861	H. sapiens	KRT14	keratin 14	GO:0045110 intermediate filament bundle assembly;GO:0031581 hemidesmosome assembly;GO:0045109 intermediate filament organization		Cancer-related genes:Candidate cancer biomarkers; Disease related genes; Predicted intracellular proteins	Intermediate filaments (reliability'])	Zinc; Zinc acetate	(M236)PID DELTA NP63 PATHWAY; (M115)PID REG GR PATHWAY		0	0	0	0	0	0	0	1	0	0	0	0	0	0	0	0	1	0	0	0	2
65018	Pink1	1	1	65018	Gene_ID	H. sapiens	65018	H. sapiens	PINK1	PTEN induced kinase 1	GO:1904542 regulation of free ubiquitin chain polymerization;GO:1904544 positive regulation of free ubiquitin chain polymerization;GO:1904881 cellular response to hydrogen sulfide	Other	Predicted intracellular proteins; Disease related genes; Enzymes; Potential drug targets; ENZYME proteins:Transferases; Kinases				(M5934)HALLMARK XENOBIOTIC METABOLISM	0	1	0	1	0	0	0	0	0	0	0	0	0	0	0	0	1	0	1	0	2
146956	Eme1	1	1	146956	Gene_ID	H. sapiens	146956	H. sapiens	EME1	essential meiotic structure-specific endonuclease 1	GO:0072429 response to intra-S DNA damage checkpoint signaling;GO:0072396 response to cell cycle checkpoint signaling;GO:0072402 response to DNA integrity checkpoint signaling		Predicted intracellular proteins	Cytosol;Nuclear bodies (reliability'])				0	0	0	0	0	0	0	0	0	0	0	0	0	0	0	1	0	0	0	0	2
2110	Etfdh	1	1	2110	Gene_ID	H. sapiens	2110	H. sapiens	ETFDH	electron transfer flavoprotein dehydrogenase	GO:0033539 fatty acid beta-oxidation using acyl-CoA dehydrogenase;GO:0006635 fatty acid beta-oxidation;GO:0019395 fatty acid oxidation		ENZYME proteins:Oxidoreductases; Predicted intracellular proteins; Disease related genes; Enzymes; Potential drug targets		Metformin; 2-Hexyloxy-6-Hydroxymethyl-Tetrahydro-Pyran-3,4,5-Triol		(M5935)HALLMARK FATTY ACID METABOLISM; (M5934)HALLMARK XENOBIOTIC METABOLISM; (M5936)HALLMARK OXIDATIVE PHOSPHORYLATION	0	1	0	0	0	0	0	0	0	0	1	0	0	0	0	0	0	0	0	0	2
5836	Pygl	1	1	5836	Gene_ID	H. sapiens	5836	H. sapiens	PYGL	glycogen phosphorylase L	GO:0006015 5-phosphoribose 1-diphosphate biosynthetic process;GO:0046391 5-phosphoribose 1-diphosphate metabolic process;GO:0005980 glycogen catabolic process		Predicted intracellular proteins; Disease related genes; Enzymes; Potential drug targets; ENZYME proteins:Transferases	Cytosol;Plasma membrane (reliability'])			(M5937)HALLMARK GLYCOLYSIS	1	1	0	1	0	0	0	0	0	0	0	0	0	0	0	1	0	0	0	0	2
3872	Krt17	1	1	3872	Gene_ID	H. sapiens	3872	H. sapiens	KRT17	keratin 17	GO:0051798 positive regulation of hair follicle development;GO:0042635 positive regulation of hair cycle;GO:0051797 regulation of hair follicle development		Cancer-related genes:Candidate cancer biomarkers; Disease related genes; Predicted intracellular proteins	Intermediate filaments (reliability'])		(M115)PID REG GR PATHWAY	(M5939)HALLMARK P53 PATHWAY	0	0	0	0	0	0	0	1	0	0	0	0	0	0	0	0	0	0	0	0	2
6703	Sprr2d	1	1	6703	Gene_ID	H. sapiens	6703	H. sapiens	SPRR2D	small proline rich protein 2D	GO:0070268 cornification;GO:0031424 keratinization;GO:0030216 keratinocyte differentiation		Predicted intracellular proteins					0	0	0	0	0	0	0	0	0	0	0	0	0	0	0	0	0	0	0	0	2
10449	Acaa2	1	1	10449	Gene_ID	H. sapiens	10449	H. sapiens	ACAA2	acetyl-CoA acyltransferase 2	GO:1902109 negative regulation of mitochondrial membrane permeability involved in apoptotic process;GO:0035795 negative regulation of mitochondrial membrane permeability;GO:1901029 negative regulation of mitochondrial outer membrane permeabilization involved in apoptotic signaling pathway		ENZYME proteins:Transferases; Predicted intracellular proteins; Enzymes	Mitochondria (reliability'])			(M5935)HALLMARK FATTY ACID METABOLISM; (M5905)HALLMARK ADIPOGENESIS; (M5936)HALLMARK OXIDATIVE PHOSPHORYLATION	0	1	0	0	0	0	0	0	0	0	1	0	0	0	0	0	0	0	0	0	2
154810	Amotl1	1	1	154810	Gene_ID	H. sapiens	154810	H. sapiens	AMOTL1	angiomotin like 1	GO:0003365 establishment of cell polarity involved in ameboidal cell migration;GO:0035329 hippo signaling;GO:0043536 positive regulation of blood vessel endothelial cell migration		Predicted intracellular proteins	Cytosol (reliability']); Additional: Cell Junctions				0	0	0	0	1	1	0	1	0	0	0	0	0	0	0	0	0	0	0	0	2
283927	Nudt7	1	1	283927	Gene_ID	H. sapiens	283927	H. sapiens	NUDT7	nudix hydrolase 7	GO:0015938 coenzyme A catabolic process;GO:0046356 acetyl-CoA catabolic process;GO:0033869 nucleoside bisphosphate catabolic process		Predicted intracellular proteins	Golgi apparatus (reliability']); Additional: Nucleoplasm				0	0	0	1	0	0	0	0	0	0	1	0	0	0	0	0	0	0	0	0	2
5170	Pdpk1	1	1	5170	Gene_ID	H. sapiens	5170	H. sapiens	PDPK1	3-phosphoinositide dependent protein kinase 1	GO:1990416 cellular response to brain-derived neurotrophic factor stimulus;GO:0003323 type B pancreatic cell development;GO:0003309 type B pancreatic cell differentiation	AGC Ser/Thr protein kinase family	Kinases:AGC Ser/Thr protein kinases; ENZYME proteins:Transferases; Predicted intracellular proteins; Enzymes	Vesicles (reliability'])	Celecoxib; Inositol 1,3,4,5-Tetrakisphosphate; 7-Hydroxystaurosporine; Bisindolylmaleimide VIII; Staurosporine; Bisindolylmaleimide I; Dexfosfoserine; 10,11-dimethoxy-4-methyldibenzo[c,f]-2,7-naphthyridine-3,6-diamine; 5-HYDROXY-3-[(1R)-1-(1H-PYRROL-2-YL)ETHYL]-2H-INDOL-2-ONE; 1-{2-OXO-3-[(1R)-1-(1H-PYRROL-2-YL)ETHYL]-2H-INDOL-5-YL}UREA; 2-(1H-imidazol-1-yl)-9-methoxy-8-(2-methoxyethoxy)benzo[c][…	(M12771)SA PTEN PATHWAY; (M226)PID VEGFR1 PATHWAY; (M1718)SIG IL4RECEPTOR IN B LYPHOCYTES		1	0	1	0	1	1	0	1	1	0	0	0	0	1	1	0	0	0	1	1	2
120425	Amica1	1	1	120425	Gene_ID	H. sapiens	120425	H. sapiens	JAML	junction adhesion molecule like	GO:0035696 monocyte extravasation;GO:0060054 positive regulation of epithelial cell proliferation involved in wound healing;GO:0072672 neutrophil extravasation		Predicted intracellular proteins			(M277)PID INTEGRIN A4B1 PATHWAY		0	0	1	0	0	0	0	0	0	0	0	1	0	0	0	0	0	0	0	1	2
7305	Tyrobp	1	1	7305	Gene_ID	H. sapiens	7305	H. sapiens	TYROBP	transmembrane immune signaling adaptor TYROBP	GO:0110090 positive regulation of hippocampal neuron apoptotic process;GO:0090634 microglial cell mediated cytotoxicity;GO:1904149 regulation of microglial cell mediated cytotoxicity		Disease related genes					1	0	1	0	0	0	0	1	0	0	0	0	0	0	1	0	0	0	0	1	2
9360	Ppig	1	1	9360	Gene_ID	H. sapiens	9360	H. sapiens	PPIG	peptidylprolyl isomerase G	GO:0000413 protein peptidyl-prolyl isomerization;GO:0018208 peptidyl-proline modification;GO:0006457 protein folding		Enzymes; Predicted intracellular proteins; ENZYME proteins:Isomerase	Nuclear speckles (reliability']); Additional: Cytosol	Proline			0	0	0	0	0	0	0	0	0	0	0	0	0	0	0	0	0	0	0	0	2
3067	Hdc	1	1	3067	Gene_ID	H. sapiens	3067	H. sapiens	HDC	histidine decarboxylase	GO:0001694 histamine biosynthetic process;GO:0001692 histamine metabolic process;GO:0006548 histidine catabolic process		ENZYME proteins:Lyases; Predicted intracellular proteins; Enzymes	Nuclear bodies (reliability'])	Pyridoxal phosphate; Histidine			0	0	0	0	0	0	0	0	0	0	0	0	0	0	0	0	0	0	0	0	2
10984	Kcnq1ot1	1	1	10984	Gene_ID	H. sapiens	10984	H. sapiens	KCNQ1OT1	KCNQ1 opposite strand/antisense transcript 1	GO:0006342 chromatin silencing;GO:0045814 negative regulation of gene expression, epigenetic;GO:0006325 chromatin organization							0	0	0	0	0	0	0	0	0	0	0	0	0	0	0	0	0	0	0	0	2
1490	Ctgf	1	1	1490	Gene_ID	H. sapiens	1490	H. sapiens	CCN2	cellular communication network factor 2	GO:0034059 response to anoxia;GO:0070318 positive regulation of G0 to G1 transition;GO:0070278 extracellular matrix constituent secretion		Cancer-related genes:Candidate cancer biomarkers; Predicted secreted proteins	Golgi apparatus;Vesicles (reliability'])		(M159)PID AMB2 NEUTROPHILS PATHWAY; (M286)PID TGFBR PATHWAY; (M3008)NABA ECM GLYCOPROTEINS	(M5891)HALLMARK HYPOXIA; (M5930)HALLMARK EPITHELIAL MESENCHYMAL TRANSITION	0	0	1	0	1	0	1	1	1	1	0	0	1	1	0	0	0	1	0	1	2
57104	Pnpla2	1	1	57104	Gene_ID	H. sapiens	57104	H. sapiens	PNPLA2	patatin like phospholipase domain containing 2	GO:0010891 negative regulation of sequestering of triglyceride;GO:0036155 acylglycerol acyl-chain remodeling;GO:0010898 positive regulation of triglyceride catabolic process		Predicted intracellular proteins; Disease related genes; ENZYME proteins:Hydrolases; Enzymes; Potential drug targets	Lipid droplets (reliability']); Additional: Nucleoplasm				0	1	0	0	0	0	0	0	0	0	1	0	0	0	0	0	0	0	0	0	2
3934	Lcn2	1	1	3934	Gene_ID	H. sapiens	3934	H. sapiens	LCN2	lipocalin 2	GO:0015688 iron chelate transport;GO:0015891 siderophore transport;GO:0010046 response to mycotoxin		Candidate cardiovascular disease genes; Predicted secreted proteins	Endoplasmic reticulum (reliability'])	Methyl nonanoate; 2,3-Dihydroxy-Benzoic Acid; Carboxymycobactin S; 2,3,-Dihydroxybenzoylserine; Carboxymycobactin T; Trencam-3,2-Hopo			1	0	0	0	0	0	0	0	0	1	0	0	0	0	0	1	1	0	0	0	2
84649	Dgat2	1	1	84649	Gene_ID	H. sapiens	84649	H. sapiens	DGAT2	diacylglycerol O-acyltransferase 2	GO:0071400 cellular response to oleic acid;GO:0034201 response to oleic acid;GO:0060613 fat pad development		ENZYME proteins:Transferases; Predicted intracellular proteins; Enzymes		Omega-3-carboxylic acids; Fish oil			0	0	0	1	0	0	0	0	0	1	1	0	0	0	0	0	0	0	0	0	2
5295	Pik3r1	1	1	5295	Gene_ID	H. sapiens	5295	H. sapiens	PIK3R1	phosphoinositide-3-kinase regulatory subunit 1	GO:1900103 positive regulation of endoplasmic reticulum unfolded protein response;GO:0060396 growth hormone receptor signaling pathway;GO:0071378 cellular response to growth hormone stimulus		Predicted intracellular proteins; Disease related genes; Cancer-related genes:Candidate cancer biomarkers; Cancer-related genes:Mutational cancer driver genes; RAS pathway related proteins; Cancer-related genes:Mutated cancer genes	Cytosol (reliability'])	Isoprenaline; SF1126; Enzastaurin; Wortmannin	(M135)PID IL5 PATHWAY; (M26)PID NFKAPPAB ATYPICAL PATHWAY; (M273)PID EPHA2 FWD PATHWAY		0	1	1	1	0	1	0	1	1	0	1	1	1	0	1	0	0	1	1	1	2
463	Zfhx3	1	1	463	Gene_ID	H. sapiens	463	H. sapiens	ZFHX3	zinc finger homeobox 3	GO:1904059 regulation of locomotor rhythm;GO:0045475 locomotor rhythm;GO:0048512 circadian behavior		Transcription factors:Helix-turn-helix domains; Cancer-related genes:Mutational cancer driver genes; Predicted intracellular proteins; Cancer-related genes:Mutated cancer genes			(M195)PID CMYB PATHWAY		0	0	1	0	0	0	0	0	0	0	0	0	0	1	0	0	0	1	0	0	2
4632	Myl1	1	1	4632	Gene_ID	H. sapiens	4632	H. sapiens	MYL1	myosin light chain 1	GO:0030049 muscle filament sliding;GO:0033275 actin-myosin filament sliding;GO:0070252 actin-mediated cell contraction		Predicted intracellular proteins				(M5909)HALLMARK MYOGENESIS	0	0	0	0	0	0	1	0	0	0	0	0	0	0	0	0	0	0	0	0	2
1622	Dbi	1	1	1622	Gene_ID	H. sapiens	1622	H. sapiens	DBI	diazepam binding inhibitor, acyl-CoA binding protein	GO:1905918 regulation of CoA-transferase activity;GO:1905920 positive regulation of CoA-transferase activity;GO:1903060 negative regulation of protein lipidation		Cancer-related genes:Candidate cancer biomarkers; Predicted intracellular proteins		Coenzyme A; Hexadecanal		(M5908)HALLMARK ANDROGEN RESPONSE	0	0	0	1	0	0	0	0	0	0	1	0	0	0	0	0	0	0	0	0	2
56246	Mrap	1	1	56246	Gene_ID	H. sapiens	56246	H. sapiens	MRAP	melanocortin 2 receptor accessory protein	GO:0106071 positive regulation of adenylate cyclase-activating G protein-coupled receptor signaling pathway;GO:0106072 negative regulation of adenylate cyclase-activating G protein-coupled receptor signaling pathway;GO:0106070 regulation of adenylate cyclase-activating G protein-coupled receptor signaling pathway		Disease related genes				(M5905)HALLMARK ADIPOGENESIS	0	0	0	0	0	0	0	0	0	0	0	0	0	0	0	0	0	0	0	0	2
51635	Dhrs7	1	1	51635	Gene_ID	H. sapiens	51635	H. sapiens	DHRS7	dehydrogenase/reductase 7	GO:0055114 oxidation-reduction process;GO:0008152 metabolic process;GO:0008150 biological_process		Predicted intracellular proteins	Mitochondria;Nucleoplasm (reliability'])			(M5905)HALLMARK ADIPOGENESIS; (M5934)HALLMARK XENOBIOTIC METABOLISM	0	0	0	0	0	0	0	0	0	0	0	0	0	0	0	0	0	0	0	0	2
3240	Hp	1	1	3240	Gene_ID	H. sapiens	3240	H. sapiens	HP	haptoglobin	GO:2000296 negative regulation of hydrogen peroxide catabolic process;GO:2000295 regulation of hydrogen peroxide catabolic process;GO:0010727 negative regulation of hydrogen peroxide metabolic process		Predicted intracellular proteins; Peptidases:Serine-type peptidases; Disease related genes; Cancer-related genes:Candidate cancer biomarkers; Predicted secreted proteins; Enzymes; Potential drug targets	Vesicles (reliability'])	Zinc chloride; Zinc sulfate, unspecified form			1	0	0	1	0	0	0	0	0	0	0	0	0	0	0	1	1	0	0	0	2
5816	Pvalb	1	1	5816	Gene_ID	H. sapiens	5816	H. sapiens	PVALB	parvalbumin	GO:0090102 cochlea development;GO:0048839 inner ear development;GO:0043583 ear development		Predicted intracellular proteins	Nucleoplasm (reliability']); Additional: Cell Junctions;Nucleoli	Formic acid		(M5909)HALLMARK MYOGENESIS	0	0	0	0	0	0	0	0	0	0	0	0	0	0	0	0	0	0	0	0	2
7204	Trio	1	1	7204	Gene_ID	H. sapiens	7204	H. sapiens	TRIO	trio Rho guanine nucleotide exchange factor	GO:0007185 transmembrane receptor protein tyrosine phosphatase signaling pathway;GO:0045599 negative regulation of fat cell differentiation;GO:0045598 regulation of fat cell differentiation	CAMK Ser/Thr protein kinase family	Predicted intracellular proteins; Disease related genes; Cancer-related genes:Mutational cancer driver genes; Enzymes; Potential drug targets; ENZYME proteins:Transferases; Kinases:CAMK Ser/Thr protein kinases	Cytosol (reliability']); Additional: Vesicles		(M108)PID NETRIN PATHWAY; (M241)PID RAC1 REG PATHWAY; (M68)PID RHOA REG PATHWAY	(M5893)HALLMARK MITOTIC SPINDLE	0	0	0	0	0	0	0	0	0	0	0	1	0	0	0	0	0	0	0	0	2
25885	Polr1a	1	1	25885	Gene_ID	H. sapiens	25885	H. sapiens	POLR1A	RNA polymerase I subunit A	GO:1904750 negative regulation of protein localization to nucleolus;GO:1904749 regulation of protein localization to nucleolus;GO:1902570 protein localization to nucleolus		Predicted intracellular proteins; Disease related genes; Enzymes; Potential drug targets; RNA polymerase related proteins; ENZYME proteins:Transferases	Nucleoli fibrillar center (reliability']); Additional: Intermediate filaments;Nucleoplasm				0	0	0	0	0	0	0	0	0	0	0	0	0	0	0	0	0	0	0	0	2
472	Atm	1	1	472	Gene_ID	H. sapiens	472	H. sapiens	ATM	ATM serine/threonine kinase	GO:1905843 regulation of cellular response to gamma radiation;GO:1904868 telomerase catalytic core complex assembly;GO:1904882 regulation of telomerase catalytic core complex assembly	Atypical: PI3/PI4-kinase family	Kinases:Atypical kinases; Predicted intracellular proteins; Disease related genes; Cancer-related genes:Candidate cancer biomarkers; Cancer-related genes:Mutational cancer driver genes; Enzymes; Potential drug targets; ENZYME proteins:Transferases; Cancer-related genes:Mutated cancer genes	Nucleoplasm;Vesicles (reliability'])	Caffeine	(M37)PID NFKAPPAB CANONICAL PATHWAY; (M20)PID P38 MKK3 6PATHWAY; (M258)PID BARD1 PATHWAY		1	0	1	1	0	1	0	0	0	1	0	0	0	0	1	0	0	0	0	0	2
4715	Ndufb9	1	1	4715	Gene_ID	H. sapiens	4715	H. sapiens	NDUFB9	NADH:ubiquinone oxidoreductase subunit B9	GO:0006120 mitochondrial electron transport, NADH to ubiquinone;GO:0010257 NADH dehydrogenase complex assembly;GO:0032981 mitochondrial respiratory chain complex I assembly		Predicted intracellular proteins	Mitochondria (reliability'])	NADH			0	1	0	1	0	0	0	0	0	0	0	0	0	0	0	0	0	0	0	0	2
3146	Hmgb1	1	1	3146	Gene_ID	H. sapiens	3146	H. sapiens	HMGB1	high mobility group box 1	GO:0032072 regulation of restriction endodeoxyribonuclease activity;GO:0017055 negative regulation of RNA polymerase II transcriptional preinitiation complex assembly;GO:2000426 negative regulation of apoptotic cell clearance		Predicted intracellular proteins	Nucleoplasm (reliability'])	Chloroquine; Ethyl pyruvate	(M264)PID TOLL ENDOGENOUS PATHWAY; (M159)PID AMB2 NEUTROPHILS PATHWAY; (M53)PID INTEGRIN3 PATHWAY		1	0	1	0	0	1	0	0	0	1	0	1	0	0	1	1	0	0	1	0	2
5921	Rasa1	1	1	5921	Gene_ID	H. sapiens	5921	H. sapiens	RASA1	RAS p21 protein activator 1	GO:0001953 negative regulation of cell-matrix adhesion;GO:0046580 negative regulation of Ras protein signal transduction;GO:0051058 negative regulation of small GTPase mediated signal transduction		Predicted intracellular proteins; Disease related genes; Cancer-related genes:Candidate cancer biomarkers; Cancer-related genes:Mutational cancer driver genes; RAS pathway related proteins; Cancer-related genes:Mutated cancer genes			(M226)PID VEGFR1 PATHWAY; (M269)PID RAS PATHWAY; (M242)PID AURORA A PATHWAY	(M5919)HALLMARK HEDGEHOG SIGNALING; (M5893)HALLMARK MITOTIC SPINDLE; (M5915)HALLMARK APICAL JUNCTION	0	0	1	0	1	0	0	1	0	0	0	0	0	0	1	0	0	0	0	0	2
6284	S100a13	1	1	6284	Gene_ID	H. sapiens	6284	H. sapiens	S100A13	S100 calcium binding protein A13	GO:0032610 interleukin-1 alpha production;GO:0051602 response to electrical stimulus;GO:0046688 response to copper ion		Predicted secreted proteins; Predicted intracellular proteins	Cytosol;Plasma membrane (reliability']); Additional: Nucleoli;Nucleoplasm	Olopatadine; Amlexanox; Calcium chloride; Calcium; Calcium citrate; Calcium Phosphate; Calcium phosphate dihydrate	(M5883)NABA SECRETED FACTORS; (M5885)NABA MATRISOME ASSOCIATED; (M5889)NABA MATRISOME	(M5946)HALLMARK COAGULATION; (M5921)HALLMARK COMPLEMENT	1	0	0	0	0	0	0	0	0	0	0	0	0	0	0	0	1	0	1	0	2
2865	Ffar3	1	1	2865	Gene_ID	H. sapiens	2865	H. sapiens	FFAR3	free fatty acid receptor 3	GO:0002879 positive regulation of acute inflammatory response to non-antigenic stimulus;GO:0002525 acute inflammatory response to non-antigenic stimulus;GO:0002877 regulation of acute inflammatory response to non-antigenic stimulus		G-protein coupled receptors:GPCRs excl olfactory receptors					0	0	0	0	0	0	0	0	1	1	0	1	0	0	0	0	0	0	1	0	2
10142	Akap9	0	1	10142	Gene_ID	H. sapiens	10142	H. sapiens	AKAP9	A-kinase anchoring protein 9	GO:0051661 maintenance of centrosome location;GO:0098909 regulation of cardiac muscle cell action potential involved in regulation of contraction;GO:0051657 maintenance of organelle location		Disease related genes; Cancer-related genes:Mutational cancer driver genes; Predicted intracellular proteins	Golgi apparatus (reliability']); Additional: Centrosome;Vesicles				0	0	0	0	0	0	0	1	1	1	0	0	0	0	0	0	0	0	0	0	1
116138	Klhdc3	1	0	116138	Gene_ID	H. sapiens	116138	H. sapiens	KLHDC3	kelch domain containing 3	GO:0007131 reciprocal meiotic recombination;GO:0035825 homologous recombination;GO:0036498 IRE1-mediated unfolded protein response		Predicted intracellular proteins	Nucleoplasm (reliability'])			(M5941)HALLMARK UV RESPONSE UP	0	0	0	0	0	0	0	0	0	0	0	0	0	0	0	0	0	0	0	0	1
92745	Slc38a5	1	0	92745	Gene_ID	H. sapiens	92745	H. sapiens	SLC38A5	solute carrier family 38 member 5	GO:1903713 asparagine transmembrane transport;GO:0006867 asparagine transport;GO:1904557 L-alanine transmembrane transport		Transporters:Electrochemical Potential-driven transporters	Plasma membrane;Vesicles (reliability']); Additional: Cytosol				0	0	0	0	0	0	0	0	0	0	0	0	0	0	0	0	0	0	0	0	1
23331	Ttc28	0	1	23331	Gene_ID	H. sapiens	23331	H. sapiens	TTC28	tetratricopeptide repeat domain 28	GO:0051301 cell division;GO:0007346 regulation of mitotic cell cycle;GO:0000278 mitotic cell cycle		Predicted intracellular proteins	Mitochondria;Nucleoli (reliability'])				0	0	0	0	0	0	0	0	0	0	0	0	0	0	0	0	0	0	0	0	1
23405	Dicer1	0	1	23405	Gene_ID	H. sapiens	23405	H. sapiens	DICER1	dicer 1, ribonuclease III	GO:0033168 conversion of ds siRNA to ss siRNA involved in RNA interference;GO:0036404 conversion of ds siRNA to ss siRNA;GO:0032290 peripheral nervous system myelin formation		Predicted intracellular proteins; Disease related genes; ENZYME proteins:Hydrolases; Cancer-related genes:Mutational cancer driver genes; Enzymes; Potential drug targets	Cytosol (reliability'])		(M256)PID TAP63 PATHWAY		0	0	0	0	0	0	0	0	0	0	0	0	0	0	0	0	0	1	0	0	1
57045	Twsg1	0	1	57045	Gene_ID	H. sapiens	57045	H. sapiens	TWSG1	twisted gastrulation BMP signaling modulator 1	GO:2000562 negative regulation of CD4-positive, alpha-beta T cell proliferation;GO:0046642 negative regulation of alpha-beta T cell proliferation;GO:0035739 CD4-positive, alpha-beta T cell proliferation		Predicted secreted proteins	Centrosome;Cytosol (reliability'])			(M5947)HALLMARK IL2 STAT5 SIGNALING	0	0	1	0	0	0	0	0	0	0	0	0	0	1	1	0	0	0	0	0	1
2318	Flnc	1	0	2318	Gene_ID	H. sapiens	2318	H. sapiens	FLNC	filamin C	GO:0048747 muscle fiber development;GO:0055002 striated muscle cell development;GO:0055001 muscle cell development		Potential drug targets; Transporters:Accessory Factors Involved in Transport; Disease related genes; Predicted intracellular proteins	Cytosol;Plasma membrane (reliability'])		(M16801)SIG REGULATION OF THE ACTIN CYTOSKELETON BY RHO GTPASES	(M5915)HALLMARK APICAL JUNCTION	0	0	0	0	0	0	0	0	0	0	0	0	0	0	0	0	0	1	0	0	1
1429	Cryz	0	1	1429	Gene_ID	H. sapiens	1429	H. sapiens	CRYZ	crystallin zeta	GO:0042178 xenobiotic catabolic process;GO:0051289 protein homotetramerization;GO:0051262 protein tetramerization		ENZYME proteins:Oxidoreductases; Predicted intracellular proteins; Enzymes	Cytosol (reliability'])	Dicoumarol; Nicotinamide adenine dinucleotide phosphate; Medical Cannabis; Nabiximols		(M5935)HALLMARK FATTY ACID METABOLISM	0	0	0	0	0	0	0	0	0	0	0	0	0	0	0	0	0	0	0	0	1
51295	Ecsit	0	1	51295	Gene_ID	H. sapiens	51295	H. sapiens	ECSIT	ECSIT signaling integrator	GO:0061635 regulation of protein complex stability;GO:0010257 NADH dehydrogenase complex assembly;GO:0032981 mitochondrial respiratory chain complex I assembly		Predicted intracellular proteins	Nucleoplasm (reliability']); Additional: Cytosol			(M5923)HALLMARK PI3K AKT MTOR SIGNALING	0	1	0	0	0	0	0	0	0	0	0	0	0	0	0	0	0	0	0	0	1
8330	Hist1h2ak	1	0	8330	Gene_ID	H. sapiens	8330	H. sapiens	H2AC15	H2A clustered histone 15	GO:0006342 chromatin silencing;GO:0045814 negative regulation of gene expression, epigenetic;GO:0006325 chromatin organization		Predicted intracellular proteins					0	0	0	0	0	0	0	0	0	0	0	0	0	0	0	0	0	0	0	0	1
7070	Thy1	1	0	7070	Gene_ID	H. sapiens	7070	H. sapiens	THY1	Thy-1 cell surface antigen	GO:2000298 regulation of Rho-dependent protein serine/threonine kinase activity;GO:0042670 retinal cone cell differentiation;GO:0046549 retinal cone cell development		CD markers; Predicted intracellular proteins	Nucleoplasm (reliability']); Additional: Plasma membrane		(M169)PID INTEGRIN2 PATHWAY; (M159)PID AMB2 NEUTROPHILS PATHWAY; (M53)PID INTEGRIN3 PATHWAY	(M5919)HALLMARK HEDGEHOG SIGNALING; (M5916)HALLMARK APICAL SURFACE; (M5915)HALLMARK APICAL JUNCTION	0	0	1	0	1	1	0	0	0	0	0	1	0	0	1	0	0	0	0	0	1
8826	Iqgap1	0	1	8826	Gene_ID	H. sapiens	8826	H. sapiens	IQGAP1	IQ motif containing GTPase activating protein 1	GO:1900086 positive regulation of peptidyl-tyrosine autophosphorylation;GO:1900084 regulation of peptidyl-tyrosine autophosphorylation;GO:0072015 glomerular visceral epithelial cell development		Predicted intracellular proteins	Cell Junctions;Plasma membrane (reliability'])	Artenimol	(M163)PID LIS1 PATHWAY; (M72)PID NECTIN PATHWAY; (M156)PID ECADHERIN NASCENT AJ PATHWAY		0	0	1	0	0	1	0	1	1	0	0	0	0	1	0	0	1	0	0	0	1
811	Calr	1	0	811	Gene_ID	H. sapiens	811	H. sapiens	CALR	calreticulin	GO:0002397 MHC class I protein complex assembly;GO:0002502 peptide antigen assembly with MHC class I protein complex;GO:0002501 peptide antigen assembly with MHC protein complex		Cancer-related genes:Candidate cancer biomarkers; Predicted intracellular proteins	Endoplasmic reticulum (reliability'])	Antihemophilic factor, human recombinant; Tenecteplase; Melatonin; Lanoteplase; Copper; Calcium citrate; Calcium Phosphate; Lonoctocog alfa; Moroctocog alfa; Calcium phosphate dihydrate		(M5923)HALLMARK PI3K AKT MTOR SIGNALING; (M5922)HALLMARK UNFOLDED PROTEIN RESPONSE; (M5924)HALLMARK MTORC1 SIGNALING	0	0	1	0	0	1	0	1	1	1	0	1	0	0	0	0	1	1	0	0	1
517	Atp5g2	0	1	517	Gene_ID	H. sapiens	517	H. sapiens	ATP5MC2	ATP synthase membrane subunit c locus 2	GO:0042776 mitochondrial ATP synthesis coupled proton transport;GO:0015985 energy coupled proton transport, down electrochemical gradient;GO:0015986 ATP synthesis coupled proton transport		Predicted intracellular proteins				(M5936)HALLMARK OXIDATIVE PHOSPHORYLATION	0	1	0	1	0	0	0	0	0	0	0	0	0	0	0	0	0	0	0	0	1
10265	Irx5	1	0	10265	Gene_ID	H. sapiens	10265	H. sapiens	IRX5	iroquois homeobox 5	GO:0060040 retinal bipolar neuron differentiation;GO:0042551 neuron maturation;GO:0048701 embryonic cranial skeleton morphogenesis		Transcription factors:Helix-turn-helix domains; Disease related genes; Predicted intracellular proteins	Nuclear speckles (reliability']); Additional: Cytosol;Microtubules				0	0	0	0	0	0	1	0	0	0	0	0	0	0	0	0	0	0	0	0	1
1033	Cdkn3	0	1	1033	Gene_ID	H. sapiens	1033	H. sapiens	CDKN3	cyclin dependent kinase inhibitor 3	GO:0000079 regulation of cyclin-dependent protein serine/threonine kinase activity;GO:0035335 peptidyl-tyrosine dephosphorylation;GO:1904029 regulation of cyclin-dependent protein kinase activity		Predicted intracellular proteins; Disease related genes; ENZYME proteins:Hydrolases; Enzymes; Potential drug targets	Cytosol (reliability'])			(M5951)HALLMARK SPERMATOGENESIS; (M5901)HALLMARK G2M CHECKPOINT; (M5925)HALLMARK E2F TARGETS	0	0	0	0	0	0	0	0	0	0	0	0	0	0	0	0	0	0	0	0	1
5468	Pparg	0	1	5468	Gene_ID	H. sapiens	5468	H. sapiens	PPARG	peroxisome proliferator activated receptor gamma	GO:2000230 negative regulation of pancreatic stellate cell proliferation;GO:0060694 regulation of cholesterol transporter activity;GO:0071306 cellular response to vitamin E		Predicted intracellular proteins; FDA approved drug targets:Small molecule drugs; Disease related genes; Transcription factors:Zinc-coordinating DNA-binding domains; Nuclear receptors; Cancer-related genes:Candidate cancer biomarkers	Nucleoplasm;Vesicles (reliability'])	alpha-Linolenic acid; Icosapent; Troglitazone; Mesalazine; Valproic acid; Indomethacin; Rosiglitazone; Fenoprofen; Nateglinide; Sulfasalazine; Clofazimine; Repaglinide; Telmisartan; Balsalazide; Ibuprofen; Glipizide; Amiodarone; Pioglitazone; Mitiglinide; Bezafibrate; Flufenamic acid; Resveratrol; Phthalic Acid; Capric acid; Doconexent; Oleic Acid; (S)-3-(4-(2-Carbazol-9-Yl-Ethoxy)-Phenyl)-2-Etho…	(M162)PID RXR VDR PATHWAY; (M23)PID WNT NONCANONICAL PATHWAY; (M60)PID NFAT TFPATHWAY	(M5892)HALLMARK CHOLESTEROL HOMEOSTASIS; (M5942)HALLMARK UV RESPONSE DN; (M5905)HALLMARK ADIPOGENESIS	0	1	0	0	1	0	0	0	1	1	1	0	0	0	1	0	0	0	0	0	1
9023	Ch25h	0	1	9023	Gene_ID	H. sapiens	9023	H. sapiens	CH25H	cholesterol 25-hydroxylase	GO:0035754 B cell chemotaxis;GO:0006699 bile acid biosynthetic process;GO:0008206 bile acid metabolic process		ENZYME proteins:Oxidoreductases; Enzymes				(M5948)HALLMARK BILE ACID METABOLISM	0	0	0	0	0	0	0	0	0	0	1	1	0	0	0	0	0	0	0	0	1
57326	Pbxip1	1	0	57326	Gene_ID	H. sapiens	57326	H. sapiens	PBXIP1	PBX homeobox interacting protein 1	GO:1904475 regulation of Ras GTPase binding;GO:2001106 regulation of Rho guanyl-nucleotide exchange factor activity;GO:1905097 regulation of guanyl-nucleotide exchange factor activity		Predicted intracellular proteins	Vesicles (reliability']); Additional: Cytosol				0	0	0	0	0	0	0	0	0	0	0	0	0	0	0	0	0	0	0	0	1
26253	Clec4e	1	0	26253	Gene_ID	H. sapiens	26253	H. sapiens	CLEC4E	C-type lectin domain family 4 member E	GO:0050715 positive regulation of cytokine secretion;GO:0002292 T cell differentiation involved in immune response;GO:0002286 T cell activation involved in immune response		Predicted intracellular proteins	Cytosol (reliability'])	Cholesterol	(M5880)NABA ECM AFFILIATED; (M5885)NABA MATRISOME ASSOCIATED; (M5889)NABA MATRISOME		1	0	1	0	0	0	0	0	0	0	0	0	0	0	0	1	0	0	1	0	1
3419	Idh3a	0	1	3419	Gene_ID	H. sapiens	3419	H. sapiens	IDH3A	isocitrate dehydrogenase (NAD(+)) 3 catalytic subunit alpha	GO:0006102 isocitrate metabolic process;GO:0006099 tricarboxylic acid cycle;GO:0006101 citrate metabolic process		ENZYME proteins:Oxidoreductases; Predicted intracellular proteins; FDA approved drug targets:Small molecule drugs; Enzymes; Citric acid cycle related proteins	Mitochondria (reliability'])	NADH; Manganese; Xanthinol; Copper		(M5905)HALLMARK ADIPOGENESIS; (M5936)HALLMARK OXIDATIVE PHOSPHORYLATION	0	1	0	0	0	0	0	0	0	0	0	0	0	0	0	0	0	0	0	0	1
54462	Ccser2	1	0	54462	Gene_ID	H. sapiens	54462	H. sapiens	CCSER2	coiled-coil serine rich protein 2	GO:0001578 microtubule bundle formation;GO:0000226 microtubule cytoskeleton organization;GO:0007017 microtubule-based process		Predicted intracellular proteins	Cytosol;Nucleoplasm (reliability'])			(M5953)HALLMARK KRAS SIGNALING UP	0	0	0	0	0	0	0	0	0	0	0	0	0	0	0	0	0	0	0	0	1
27122	Dkk3	1	0	27122	Gene_ID	H. sapiens	27122	H. sapiens	DKK3	dickkopf WNT signaling pathway inhibitor 3	GO:1902612 regulation of anti-Mullerian hormone signaling pathway;GO:1902613 negative regulation of anti-Mullerian hormone signaling pathway;GO:1990262 anti-Mullerian hormone signaling pathway		Predicted secreted proteins	Vesicles (reliability']); Additional: Cytosol;Nuclear bodies				0	0	0	0	0	0	0	0	0	0	0	0	0	1	0	0	0	0	0	0	1
151195	Ccnyl1	0	1	151195	Gene_ID	H. sapiens	151195	H. sapiens	CCNYL1	cyclin Y like 1	GO:0045737 positive regulation of cyclin-dependent protein serine/threonine kinase activity;GO:1904031 positive regulation of cyclin-dependent protein kinase activity;GO:0030317 flagellated sperm motility		Predicted intracellular proteins	Plasma membrane (reliability'])				0	0	0	0	0	0	0	0	0	0	0	0	0	0	0	0	0	0	0	0	1
7388	Uqcrh	1	0	7388	Gene_ID	H. sapiens	7388	H. sapiens	UQCRH	ubiquinol-cytochrome c reductase hinge protein	GO:0006122 mitochondrial electron transport, ubiquinol to cytochrome c;GO:0009060 aerobic respiration;GO:0042775 mitochondrial ATP synthesis coupled electron transport		Predicted intracellular proteins		2-Hexyloxy-6-Hydroxymethyl-Tetrahydro-Pyran-3,4,5-Triol; 6-Hydroxy-5-undecyl-4,7-benzothiazoledione; Azoxystrobin; (5S)-3-ANILINO-5-(2,4-DIFLUOROPHENYL)-5-METHYL-1,3-OXAZOLIDINE-2,4-DIONE; (S)-famoxadone; METHYL (2Z)-3-METHOXY-2-{2-[(E)-2-PHENYLVINYL]PHENYL}ACRYLATE; 2-Nonyl-4-quinolinol 1-oxide; Ubiquinone Q2		(M5936)HALLMARK OXIDATIVE PHOSPHORYLATION	0	1	0	1	0	0	1	0	0	0	0	0	0	0	0	0	0	0	0	0	1
7113	Tmprss2	1	0	7113	Gene_ID	H. sapiens	7113	H. sapiens	TMPRSS2	transmembrane serine protease 2	GO:0046598 positive regulation of viral entry into host cell;GO:0016540 protein autoprocessing;GO:0046596 regulation of viral entry into host cell		Peptidases:Serine-type peptidases; Cancer-related genes:Candidate cancer biomarkers; Predicted intracellular proteins; Enzymes	Cell Junctions (reliability']); Additional: Nucleoplasm	Camostat	(M151)PID AR TF PATHWAY; (M58)PID AR PATHWAY	(M5908)HALLMARK ANDROGEN RESPONSE	0	0	0	0	0	0	0	0	0	0	0	0	0	0	0	0	0	0	0	0	1
4629	Myh11	1	0	4629	Gene_ID	H. sapiens	4629	H. sapiens	MYH11	myosin heavy chain 11	GO:0030241 skeletal muscle myosin thick filament assembly;GO:0071688 striated muscle myosin thick filament assembly;GO:0031034 myosin filament assembly		Predicted intracellular proteins; Candidate cardiovascular disease genes; Disease related genes; Cancer-related genes	Cytosol;Plasma membrane (reliability'])	Tetrafluoroaluminate Ion		(M5909)HALLMARK MYOGENESIS	0	0	0	0	0	0	1	1	0	0	0	0	1	0	0	0	0	1	0	0	1
1339	Cox6a2	1	0	1339	Gene_ID	H. sapiens	1339	H. sapiens	COX6A2	cytochrome c oxidase subunit 6A2	GO:0006123 mitochondrial electron transport, cytochrome c to oxygen;GO:0019646 aerobic electron transport chain;GO:0009060 aerobic respiration		Predicted intracellular proteins; Transporters:Primary Active Transporters		Cholic Acid; N-Formylmethionine		(M5909)HALLMARK MYOGENESIS	0	1	0	1	0	0	1	0	0	0	0	0	0	0	0	0	0	0	0	0	1
25984	Krt23	1	0	25984	Gene_ID	H. sapiens	25984	H. sapiens	KRT23	keratin 23	GO:0070268 cornification;GO:0031424 keratinization;GO:0030216 keratinocyte differentiation		Predicted intracellular proteins	Intermediate filaments (reliability']); Additional: Cytosol				0	0	0	0	0	0	0	0	0	0	0	0	0	0	0	0	0	0	0	0	1
9586	Creb5	0	1	9586	Gene_ID	H. sapiens	9586	H. sapiens	CREB5	cAMP responsive element binding protein 5	GO:0045893 positive regulation of transcription, DNA-templated;GO:1903508 positive regulation of nucleic acid-templated transcription;GO:1902680 positive regulation of RNA biosynthetic process		Transcription factors:Basic domains; Predicted intracellular proteins	Nucleoplasm;Plasma membrane (reliability']); Additional: Vesicles		(M295)SIG PIP3 SIGNALING IN CARDIAC MYOCTES		0	1	0	0	0	0	0	0	0	0	0	0	0	0	0	0	0	0	0	0	1
1368	Cpm	1	0	1368	Gene_ID	H. sapiens	1368	H. sapiens	CPM	carboxypeptidase M	GO:0016485 protein processing;GO:0051604 protein maturation;GO:0006518 peptide metabolic process		ENZYME proteins:Hydrolases; Peptidases:Metallopeptidases; Predicted intracellular proteins; Enzymes	Vesicles (reliability'])			(M5921)HALLMARK COMPLEMENT	0	0	0	0	0	0	0	0	0	0	0	0	0	0	0	0	0	0	0	0	1
81892	Slirp	0	1	81892	Gene_ID	H. sapiens	81892	H. sapiens	SLIRP	SRA stem-loop interacting RNA binding protein	GO:0000961 negative regulation of mitochondrial RNA catabolic process;GO:0000960 regulation of mitochondrial RNA catabolic process;GO:0000957 mitochondrial RNA catabolic process		Predicted intracellular proteins	Mitochondria (reliability'])				0	1	0	0	0	0	0	0	0	0	0	0	0	0	0	0	0	0	0	0	1
199675	Mcemp1	1	0	199675	Gene_ID	H. sapiens	199675	H. sapiens	MCEMP1	mast cell expressed membrane protein 1	GO:0043312 neutrophil degranulation;GO:0002283 neutrophil activation involved in immune response;GO:0002446 neutrophil mediated immunity							1	0	0	0	0	0	0	0	0	0	0	0	0	0	0	0	0	0	0	0	1
55209	Setd5	0	1	55209	Gene_ID	H. sapiens	55209	H. sapiens	SETD5	SET domain containing 5	GO:0097198 histone H3-K36 trimethylation;GO:0010452 histone H3-K36 methylation;GO:0051567 histone H3-K9 methylation		Disease related genes; Predicted intracellular proteins	Nucleoplasm (reliability']); Additional: Cytosol				0	0	0	0	0	0	0	0	0	0	0	0	0	0	0	0	0	0	0	0	1
377	Arf3	0	1	377	Gene_ID	H. sapiens	377	H. sapiens	ARF3	ADP ribosylation factor 3	GO:0006890 retrograde vesicle-mediated transport, Golgi to ER;GO:0006661 phosphatidylinositol biosynthetic process;GO:0046488 phosphatidylinositol metabolic process		Predicted intracellular proteins			(M1529)SA G1 AND S PHASES		0	0	0	1	0	0	0	0	0	0	1	0	0	0	0	0	0	0	0	0	1
51020	Hddc2	0	1	51020	Gene_ID	H. sapiens	51020	H. sapiens	HDDC2	HD domain containing 2	GO:0016311 dephosphorylation;GO:0006796 phosphate-containing compound metabolic process;GO:0006793 phosphorus metabolic process		Predicted intracellular proteins	Nucleoli (reliability']); Additional: Nucleoplasm			(M5926)HALLMARK MYC TARGETS V1	0	0	0	0	0	0	0	0	0	0	0	0	0	0	0	0	0	0	0	0	1
64784	Crtc3	1	0	64784	Gene_ID	H. sapiens	64784	H. sapiens	CRTC3	CREB regulated transcription coactivator 3	GO:0032793 positive regulation of CREB transcription factor activity;GO:0050995 negative regulation of lipid catabolic process;GO:0043951 negative regulation of cAMP-mediated signaling		Cancer-related genes:Mutational cancer driver genes; Predicted intracellular proteins	Nucleoplasm (reliability']); Additional: Cytosol				1	0	0	0	0	0	0	0	0	0	0	0	0	0	0	0	0	0	0	0	1
6182	Mrpl12	0	1	6182	Gene_ID	H. sapiens	6182	H. sapiens	MRPL12	mitochondrial ribosomal protein L12	GO:0006390 mitochondrial transcription;GO:0000959 mitochondrial RNA metabolic process;GO:0070125 mitochondrial translational elongation		Ribosomal proteins; Predicted intracellular proteins	Mitochondria (reliability'])				0	0	0	0	0	0	0	0	0	0	0	0	0	0	0	0	0	0	0	0	1
3315	Hspb1	1	0	3315	Gene_ID	H. sapiens	3315	H. sapiens	HSPB1	heat shock protein family B (small) member 1	GO:0038033 positive regulation of endothelial cell chemotaxis by VEGF-activated vascular endothelial growth factor receptor signaling pathway;GO:0038089 positive regulation of cell migration by vascular endothelial growth factor signaling pathway;GO:0099641 anterograde axonal protein transport		Cancer-related genes:Candidate cancer biomarkers; Disease related genes; Predicted intracellular proteins	Cytosol;Plasma membrane (reliability'])	Apatorsen; Artenimol; Phenethyl Isothiocyanate	(M199)PID P38 MK2 PATHWAY; (M229)PID P38 ALPHA BETA DOWNSTREAM PATHWAY	(M5916)HALLMARK APICAL SURFACE; (M5902)HALLMARK APOPTOSIS	0	0	0	0	1	1	0	0	0	0	0	1	0	1	0	0	0	0	0	1	1
126393	Hspb6	1	0	126393	Gene_ID	H. sapiens	126393	H. sapiens	HSPB6	heat shock protein family B (small) member 6	GO:0010667 negative regulation of cardiac muscle cell apoptotic process;GO:0010664 negative regulation of striated muscle cell apoptotic process;GO:0010656 negative regulation of muscle cell apoptotic process		Predicted intracellular proteins	Cytosol (reliability']); Additional: Golgi apparatus;Nucleoli				0	0	0	0	1	0	1	0	0	0	0	0	0	0	0	0	0	0	0	0	1
3157	Hmgcs1	1	0	3157	Gene_ID	H. sapiens	3157	H. sapiens	HMGCS1	3-hydroxy-3-methylglutaryl-CoA synthase 1	GO:0009645 response to low light intensity stimulus;GO:0046690 response to tellurium ion;GO:0010142 farnesyl diphosphate biosynthetic process, mevalonate pathway		ENZYME proteins:Transferases; Predicted intracellular proteins; Enzymes	Cytosol;Nucleoplasm (reliability']); Additional: Plasma membrane	(7R,12R,13R)-13-formyl-12,14-dihydroxy-3,5,7-trimethyltetradeca-2,4-dienoic acid	(M106)PID HNF3B PATHWAY	(M5892)HALLMARK CHOLESTEROL HOMEOSTASIS; (M5908)HALLMARK ANDROGEN RESPONSE; (M5935)HALLMARK FATTY ACID METABOLISM	0	0	0	1	0	0	0	0	1	1	1	0	0	0	0	0	1	0	0	0	1
8048	Csrp3	1	0	8048	Gene_ID	H. sapiens	8048	H. sapiens	CSRP3	cysteine and glycine rich protein 3	GO:0035995 detection of muscle stretch;GO:0033292 T-tubule organization;GO:0035994 response to muscle stretch		Disease related genes; Predicted intracellular proteins				(M5909)HALLMARK MYOGENESIS	0	0	0	0	0	0	1	1	1	0	0	0	0	0	0	0	0	1	0	0	1
55819	Rnf130	0	1	55819	Gene_ID	H. sapiens	55819	H. sapiens	RNF130	ring finger protein 130	GO:0006511 ubiquitin-dependent protein catabolic process;GO:0019941 modification-dependent protein catabolic process;GO:0043632 modification-dependent macromolecule catabolic process		ENZYME proteins:Transferases; Enzymes					0	0	0	0	0	0	0	0	0	0	0	0	0	0	0	0	0	0	0	0	1
3190	Hnrnpk	1	0	3190	Gene_ID	H. sapiens	3190	H. sapiens	HNRNPK	heterogeneous nuclear ribonucleoprotein K	GO:0045716 positive regulation of low-density lipoprotein particle receptor biosynthetic process;GO:0045714 regulation of low-density lipoprotein particle receptor biosynthetic process;GO:0045713 low-density lipoprotein particle receptor biosynthetic process		Disease related genes; Predicted intracellular proteins	Nucleoplasm (reliability'])	Artenimol; Phenethyl Isothiocyanate			0	0	0	0	0	0	0	0	0	0	0	0	0	0	0	0	0	0	0	0	1
6376	Cx3cl1	1	0	6376	Gene_ID	H. sapiens	6376	H. sapiens	CX3CL1	C-X3-C motif chemokine ligand 1	GO:0051041 positive regulation of calcium-independent cell-cell adhesion;GO:0051040 regulation of calcium-independent cell-cell adhesion;GO:0110091 negative regulation of hippocampal neuron apoptotic process		Predicted secreted proteins	Plasma membrane (reliability'])		(M145)PID P53 DOWNSTREAM PATHWAY; (M5883)NABA SECRETED FACTORS; (M5885)NABA MATRISOME ASSOCIATED	(M5916)HALLMARK APICAL SURFACE; (M5915)HALLMARK APICAL JUNCTION; (M5932)HALLMARK INFLAMMATORY RESPONSE	1	0	1	0	1	1	0	1	0	1	0	1	0	0	1	1	0	0	1	1	1
4664	Nab1	0	1	4664	Gene_ID	H. sapiens	4664	H. sapiens	NAB1	NGFI-A binding protein 1	GO:0001958 endochondral ossification;GO:0036075 replacement ossification;GO:0014037 Schwann cell differentiation		Predicted intracellular proteins	Nucleoplasm;Plasma membrane (reliability']); Additional: Golgi apparatus				0	0	0	0	0	0	0	0	0	0	0	0	0	0	0	0	0	0	0	0	1
5396	Prrx1	1	0	5396	Gene_ID	H. sapiens	5396	H. sapiens	PRRX1	paired related homeobox 1	GO:0100026 positive regulation of DNA repair by transcription from RNA polymerase II promoter;GO:0048664 neuron fate determination;GO:0042474 middle ear morphogenesis		Transcription factors:Helix-turn-helix domains; Disease related genes; Cancer-related genes; Predicted intracellular proteins	Nucleoplasm (reliability'])			(M5930)HALLMARK EPITHELIAL MESENCHYMAL TRANSITION; (M5953)HALLMARK KRAS SIGNALING UP	0	0	0	0	1	0	0	0	0	0	0	0	0	0	0	0	0	0	0	0	1
84464	Slx4	1	0	84464	Gene_ID	H. sapiens	84464	H. sapiens	SLX4	SLX4 structure-specific endonuclease subunit	GO:1904431 positive regulation of t-circle formation;GO:0000706 meiotic DNA double-strand break processing;GO:0072429 response to intra-S DNA damage checkpoint signaling		Disease related genes; Predicted intracellular proteins	Nucleoplasm (reliability']); Additional: Cell Junctions;Cytosol				0	0	0	0	0	0	0	0	0	0	0	0	0	0	0	1	0	0	0	0	1
4711	Ndufb5	0	1	4711	Gene_ID	H. sapiens	4711	H. sapiens	NDUFB5	NADH:ubiquinone oxidoreductase subunit B5	GO:0006120 mitochondrial electron transport, NADH to ubiquinone;GO:0010257 NADH dehydrogenase complex assembly;GO:0032981 mitochondrial respiratory chain complex I assembly		Predicted intracellular proteins	Mitochondria (reliability']); Additional: Nucleoplasm	NADH		(M5936)HALLMARK OXIDATIVE PHOSPHORYLATION	0	1	0	1	0	0	0	0	0	0	0	0	0	0	0	0	0	0	0	0	1
1107	Chd3	1	0	1107	Gene_ID	H. sapiens	1107	H. sapiens	CHD3	chromodomain helicase DNA binding protein 3	GO:0043044 ATP-dependent chromatin remodeling;GO:0032508 DNA duplex unwinding;GO:0032392 DNA geometric change		ENZYME proteins:Hydrolases; Predicted intracellular proteins; Enzymes	Centriolar satellite;Nucleoli;Nucleoplasm (reliability'])		(M101)PID HDAC CLASSI PATHWAY		0	0	0	0	0	0	0	0	0	0	0	0	0	0	0	0	0	0	0	0	1
55082	Arglu1	0	1	55082	Gene_ID	H. sapiens	55082	H. sapiens	ARGLU1	arginine and glutamate rich 1			Predicted intracellular proteins	Nucleoplasm (reliability']); Additional: Cytosol;Mitochondria				0	0	0	0	0	0	0	0	0	0	0	0	0	0	0	0	0	0	0	0	1
4811	Nid1	1	0	4811	Gene_ID	H. sapiens	4811	H. sapiens	NID1	nidogen 1	GO:0032836 glomerular basement membrane development;GO:0071711 basement membrane organization;GO:0032835 glomerulus development		Predicted secreted proteins		Urokinase	(M5887)NABA BASEMENT MEMBRANES; (M18)PID INTEGRIN1 PATHWAY; (M3008)NABA ECM GLYCOPROTEINS		0	0	1	0	0	0	0	0	0	0	0	0	1	0	0	0	0	0	0	0	1
598	Bcl2l1	0	1	598	Gene_ID	H. sapiens	598	H. sapiens	BCL2L1	BCL2 like 1	GO:0019050 suppression by virus of host apoptotic process;GO:0039526 modulation by virus of host apoptotic process;GO:0033668 negative regulation by symbiont of host apoptotic process		Cancer-related genes:Candidate cancer biomarkers; Predicted intracellular proteins; Transporters:Transporter channels and pores; RAS pathway related proteins	Mitochondria (reliability'])	4'-FLUORO-1,1'-BIPHENYL-4-CARBOXYLIC ACID; Isosorbide; Gossypol	(M13096)SA PROGRAMMED CELL DEATH; (M182)PID IL3 PATHWAY; (M234)PID IL2 STAT5 PATHWAY	(M5902)HALLMARK APOPTOSIS; (M5947)HALLMARK IL2 STAT5 SIGNALING	0	1	0	0	0	0	0	0	1	0	0	0	0	0	0	0	0	0	0	0	1
92304	Scgb3a1	1	0	92304	Gene_ID	H. sapiens	92304	H. sapiens	SCGB3A1	secretoglobin family 3A member 1	GO:1901741 positive regulation of myoblast fusion;GO:1901739 regulation of myoblast fusion;GO:0060143 positive regulation of syncytium formation by plasma membrane fusion		Predicted secreted proteins					0	0	0	0	0	0	0	0	0	0	0	0	0	0	0	0	0	1	0	0	1
283537	Slc46a3	1	0	283537	Gene_ID	H. sapiens	283537	H. sapiens	SLC46A3	solute carrier family 46 member 3	GO:0055085 transmembrane transport;GO:0006810 transport;GO:0051234 establishment of localization		Transporters:Electrochemical Potential-driven transporters	Cytosol;Plasma membrane (reliability']); Additional: Actin filaments			(M5934)HALLMARK XENOBIOTIC METABOLISM	0	0	0	0	0	0	0	0	0	0	0	0	0	0	0	0	0	0	0	0	1
27063	Ankrd1	1	0	27063	Gene_ID	H. sapiens	27063	H. sapiens	ANKRD1	ankyrin repeat domain 1	GO:0043517 positive regulation of DNA damage response, signal transduction by p53 class mediator;GO:0035994 response to muscle stretch;GO:1901798 positive regulation of signal transduction by p53 class mediator		Disease related genes; Predicted intracellular proteins	Nucleoli fibrillar center (reliability']); Additional: Nucleoplasm				0	0	0	0	0	0	1	1	0	1	1	0	0	1	0	1	0	1	1	0	1
4319	Mmp10	1	0	4319	Gene_ID	H. sapiens	4319	H. sapiens	MMP10	matrix metallopeptidase 10	GO:0030574 collagen catabolic process;GO:0022617 extracellular matrix disassembly;GO:0032963 collagen metabolic process		FDA approved drug targets:Small molecule drugs; ENZYME proteins:Hydrolases; Cancer-related genes:Candidate cancer biomarkers; Predicted secreted proteins; Enzymes; Peptidases:Metallopeptidases	Cytosol (reliability']); Additional: Plasma membrane	Marimastat; N-ISOBUTYL-N-[4-METHOXYPHENYLSULFONYL]GLYCYL HYDROXAMIC ACID	(M3468)NABA ECM REGULATORS; (M5885)NABA MATRISOME ASSOCIATED; (M5889)NABA MATRISOME	(M5946)HALLMARK COAGULATION; (M5953)HALLMARK KRAS SIGNALING UP	0	0	0	0	0	0	0	0	0	0	0	0	1	0	0	0	0	0	0	0	1
8870	Ier3	0	1	8870	Gene_ID	H. sapiens	8870	H. sapiens	IER3	immediate early response 3	GO:0014066 regulation of phosphatidylinositol 3-kinase signaling;GO:0014065 phosphatidylinositol 3-kinase signaling;GO:0048015 phosphatidylinositol-mediated signaling		Predicted intracellular proteins				(M5902)HALLMARK APOPTOSIS; (M5890)HALLMARK TNFA SIGNALING VIA NFKB; (M5891)HALLMARK HYPOXIA	0	0	0	0	0	0	0	0	0	0	0	0	0	0	0	0	0	0	0	0	1
51669	Saraf	0	1	51669	Gene_ID	H. sapiens	51669	H. sapiens	SARAF	store-operated calcium entry associated regulatory factor	GO:2001256 regulation of store-operated calcium entry;GO:0002115 store-operated calcium entry;GO:0051924 regulation of calcium ion transport		Predicted intracellular proteins	Endoplasmic reticulum (reliability']); Additional: Rods & Rings				0	0	0	0	0	0	0	0	0	0	0	0	0	0	0	0	0	0	0	0	1
84128	Wdr75	1	0	84128	Gene_ID	H. sapiens	84128	H. sapiens	WDR75	WD repeat domain 75	GO:0090070 positive regulation of ribosome biogenesis;GO:2000234 positive regulation of rRNA processing;GO:2000232 regulation of rRNA processing		Predicted intracellular proteins	Nucleoplasm (reliability'])				0	0	0	0	0	0	0	0	0	0	0	0	0	0	0	0	0	0	0	0	1
4624	Myh6	1	0	4624	Gene_ID	H. sapiens	4624	H. sapiens	MYH6	myosin heavy chain 6	GO:0007522 visceral muscle development;GO:0055009 atrial cardiac muscle tissue morphogenesis;GO:0003228 atrial cardiac muscle tissue development		Candidate cardiovascular disease genes; Disease related genes; Predicted intracellular proteins					0	0	0	1	0	0	1	1	0	0	0	0	0	0	0	0	0	1	0	0	1
25945	Nectin3	1	0	25945	Gene_ID	H. sapiens	25945	H. sapiens	NECTIN3	nectin cell adhesion molecule 3	GO:1902414 protein localization to cell junction;GO:0002089 lens morphogenesis in camera-type eye;GO:0007157 heterophilic cell-cell adhesion via plasma membrane cell adhesion molecules		CD markers; Predicted intracellular proteins	Centriolar satellite (reliability'])		(M72)PID NECTIN PATHWAY	(M5915)HALLMARK APICAL JUNCTION	0	0	0	0	0	0	0	0	0	0	0	0	0	0	0	0	0	0	0	0	1
94005	Pigs	1	0	94005	Gene_ID	H. sapiens	94005	H. sapiens	PIGS	phosphatidylinositol glycan anchor biosynthesis class S	GO:0016255 attachment of GPI anchor to protein;GO:0006506 GPI anchor biosynthetic process;GO:0006505 GPI anchor metabolic process							0	0	0	1	0	0	0	0	0	0	0	0	0	0	0	0	0	0	0	0	1
28971	Aamdc	0	1	28971	Gene_ID	H. sapiens	28971	H. sapiens	AAMDC	adipogenesis associated Mth938 domain containing	GO:0045600 positive regulation of fat cell differentiation;GO:0045598 regulation of fat cell differentiation;GO:0045444 fat cell differentiation		Predicted intracellular proteins	Nucleoplasm (reliability']); Additional: Cytosol				0	0	0	0	0	0	0	0	0	0	0	0	0	0	0	0	0	0	0	0	1
4323	Mmp14	0	1	4323	Gene_ID	H. sapiens	4323	H. sapiens	MMP14	matrix metallopeptidase 14	GO:1990834 response to odorant;GO:0043615 astrocyte cell migration;GO:0045579 positive regulation of B cell differentiation		Predicted intracellular proteins; FDA approved drug targets:Small molecule drugs; Disease related genes; ENZYME proteins:Hydrolases; Cancer-related genes:Candidate cancer biomarkers; Enzymes; Peptidases:Metallopeptidases	Cytosol (reliability']); Additional: Intermediate filaments	Marimastat	(M44)PID HIF2PATHWAY; (M281)PID FAK PATHWAY; (M3468)NABA ECM REGULATORS	(M5946)HALLMARK COAGULATION; (M5941)HALLMARK UV RESPONSE UP; (M5921)HALLMARK COMPLEMENT	0	0	1	0	1	1	0	0	0	0	0	0	1	0	1	0	0	1	0	0	1
4033	Lrmp	1	0	4033	Gene_ID	H. sapiens	4033	H. sapiens	IRAG2	inositol 1,4,5-triphosphate receptor associated 2	GO:0006903 vesicle targeting;GO:0006906 vesicle fusion;GO:0090174 organelle membrane fusion		Predicted intracellular proteins	Vesicles (reliability']); Additional: Cytosol;Nucleoplasm			(M5939)HALLMARK P53 PATHWAY	1	0	0	0	0	0	0	0	0	0	0	0	0	0	0	0	0	0	0	0	1
687	Klf9	0	1	687	Gene_ID	H. sapiens	687	H. sapiens	KLF9	Kruppel like factor 9	GO:0071387 cellular response to cortisol stimulus;GO:0051414 response to cortisol;GO:0010839 negative regulation of keratinocyte proliferation		Transcription factors:Zinc-coordinating DNA-binding domains; Predicted intracellular proteins	Nucleoplasm (reliability']); Additional: Cytosol;Plasma membrane			(M5890)HALLMARK TNFA SIGNALING VIA NFKB	0	0	0	0	0	0	0	0	1	1	0	0	0	0	0	0	0	0	0	0	1
136319	Mtpn	0	1	136319	Gene_ID	H. sapiens	136319	H. sapiens	MTPN	myotrophin	GO:2000812 regulation of barbed-end actin filament capping;GO:0021684 cerebellar granular layer formation;GO:0021707 cerebellar granule cell differentiation		Predicted intracellular proteins	Cytosol;Plasma membrane (reliability'])				0	0	0	0	0	0	0	1	0	0	0	0	0	0	0	0	0	1	0	1	1
93664	Cadps2	1	0	93664	Gene_ID	H. sapiens	93664	H. sapiens	CADPS2	calcium dependent secretion activator 2	GO:1990504 dense core granule exocytosis;GO:0016082 synaptic vesicle priming;GO:0140029 exocytic process		Predicted intracellular proteins	Nucleoplasm;Vesicles (reliability'])	Calcium citrate; Calcium Phosphate; Calcium phosphate dihydrate			1	0	0	0	0	0	0	0	0	0	0	0	0	0	0	0	0	0	1	0	1
64919	Bcl11b	1	0	64919	Gene_ID	H. sapiens	64919	H. sapiens	BCL11B	BAF chromatin remodeling complex subunit BCL11B	GO:0071678 olfactory bulb axon guidance;GO:0097534 lymphoid lineage cell migration;GO:0097535 lymphoid lineage cell migration into thymus		Predicted intracellular proteins; Disease related genes; Transcription factors:Zinc-coordinating DNA-binding domains; Cancer-related genes	Nucleoplasm (reliability']); Additional: Nucleoli fibrillar center			(M5906)HALLMARK ESTROGEN RESPONSE EARLY	0	0	1	0	0	0	0	0	0	0	0	1	0	0	0	0	0	0	0	0	1
2799	Gns	1	0	2799	Gene_ID	H. sapiens	2799	H. sapiens	GNS	glucosamine (N-acetyl)-6-sulfatase	GO:0042340 keratan sulfate catabolic process;GO:0042339 keratan sulfate metabolic process;GO:0044273 sulfur compound catabolic process		Predicted intracellular proteins; Disease related genes; ENZYME proteins:Hydrolases; Enzymes; Potential drug targets					1	0	0	0	0	0	0	0	0	0	0	0	0	0	0	0	0	0	0	0	1
10365	Klf2	0	1	10365	Gene_ID	H. sapiens	10365	H. sapiens	KLF2	Kruppel like factor 2	GO:0097532 stress response to acid chemical;GO:0097533 cellular stress response to acid chemical;GO:0071409 cellular response to cycloheximide		Transcription factors:Zinc-coordinating DNA-binding domains; Predicted intracellular proteins	Nucleoplasm (reliability'])			(M5890)HALLMARK TNFA SIGNALING VIA NFKB	0	0	0	0	1	0	0	0	1	1	0	0	0	0	0	1	1	0	0	0	1
5567	Prkacb	1	0	5567	Gene_ID	H. sapiens	5567	H. sapiens	PRKACB	protein kinase cAMP-activated catalytic subunit beta	GO:0097338 response to clozapine;GO:0097332 response to antipsychotic drug;GO:1901621 negative regulation of smoothened signaling pathway involved in dorsal/ventral neural tube patterning	AGC Ser/Thr protein kinase family	Predicted intracellular proteins; Kinases:AGC Ser/Thr protein kinases; Enzymes; ENZYME proteins:Transferases; RAS pathway related proteins	Cytosol (reliability'])	Phosphonothreonine; Fostamatinib	(M182)PID IL3 PATHWAY; (M277)PID INTEGRIN A4B1 PATHWAY; (M22)PID GMCSF PATHWAY		0	1	0	0	0	0	1	0	1	0	1	1	1	0	0	0	0	0	0	1	1
10014	Hdac5	1	0	10014	Gene_ID	H. sapiens	10014	H. sapiens	HDAC5	histone deacetylase 5	GO:2000615 regulation of histone H3-K9 acetylation;GO:0043970 histone H3-K9 acetylation;GO:0010832 negative regulation of myotube differentiation		Predicted intracellular proteins; FDA approved drug targets:Small molecule drugs; ENZYME proteins:Hydrolases; Cancer-related genes:Candidate cancer biomarkers; Enzymes	Nuclear speckles (reliability']); Additional: Cytosol;Golgi apparatus		(M30)PID HDAC CLASSII PATHWAY; (M101)PID HDAC CLASSI PATHWAY	(M5895)HALLMARK WNT BETA CATENIN SIGNALING; (M5909)HALLMARK MYOGENESIS	0	0	1	0	1	0	0	0	1	1	0	0	0	0	0	1	0	1	0	0	1
7049	Tgfbr3	0	1	7049	Gene_ID	H. sapiens	7049	H. sapiens	TGFBR3	transforming growth factor beta receptor 3	GO:0007181 transforming growth factor beta receptor complex assembly;GO:0034699 response to luteinizing hormone;GO:0060935 cardiac fibroblast cell differentiation		Cancer-related genes:Candidate cancer biomarkers; Predicted secreted proteins	Cytosol (reliability'])		(M286)PID TGFBR PATHWAY	(M5942)HALLMARK UV RESPONSE DN; (M5902)HALLMARK APOPTOSIS; (M5930)HALLMARK EPITHELIAL MESENCHYMAL TRANSITION	0	0	0	0	1	0	0	0	1	0	0	0	0	1	0	0	0	1	0	0	1
10240	Mrps31	0	1	10240	Gene_ID	H. sapiens	10240	H. sapiens	MRPS31	mitochondrial ribosomal protein S31	GO:0070125 mitochondrial translational elongation;GO:0070126 mitochondrial translational termination;GO:0006415 translational termination		Ribosomal proteins; Predicted intracellular proteins	Mitochondria (reliability']); Additional: Nucleoli			(M5942)HALLMARK UV RESPONSE DN	0	0	0	0	0	0	0	0	0	0	0	0	0	0	0	0	0	0	0	0	1
654790	Pcp4l1	1	0	654790	Gene_ID	H. sapiens	654790	H. sapiens	PCP4L1	Purkinje cell protein 4 like 1			Predicted intracellular proteins	Mitochondria;Nucleoplasm (reliability'])				0	0	0	0	0	0	0	0	0	0	0	0	0	0	0	0	0	0	0	0	1
7798	Luzp1	0	1	7798	Gene_ID	H. sapiens	7798	H. sapiens	LUZP1	leucine zipper protein 1	GO:0021503 neural fold bending;GO:0001842 neural fold formation;GO:0060571 morphogenesis of an epithelial fold		Predicted intracellular proteins	Actin filaments (reliability']); Additional: Cytosol;Vesicles				0	0	0	0	1	0	0	0	0	0	0	0	0	0	0	0	0	0	0	0	1
27129	Hspb7	1	0	27129	Gene_ID	H. sapiens	27129	H. sapiens	HSPB7	heat shock protein family B (small) member 7	GO:0006986 response to unfolded protein;GO:0035966 response to topologically incorrect protein;GO:0008016 regulation of heart contraction		Predicted intracellular proteins	Nucleoplasm (reliability'])				0	0	0	0	0	0	1	0	0	0	0	0	0	0	0	0	0	0	0	0	1
255758	Tctex1d2	0	1	255758	Gene_ID	H. sapiens	255758	H. sapiens	DYNLT2B	dynein light chain Tctex-type 2B	GO:1905799 regulation of intraciliary retrograde transport;GO:0035721 intraciliary retrograde transport;GO:0060632 regulation of microtubule-based movement		Disease related genes; Predicted intracellular proteins	Cytosol (reliability'])				0	0	0	0	0	0	0	0	0	0	0	0	0	0	0	0	0	0	0	0	1
10018	Bcl2l11	0	1	10018	Gene_ID	H. sapiens	10018	H. sapiens	BCL2L11	BCL2 like 11	GO:0034263 positive regulation of autophagy in response to ER overload;GO:0052151 positive regulation by symbiont of host apoptotic process;GO:0060139 positive regulation of apoptotic process by virus		Transporters:Accessory Factors Involved in Transport; Predicted intracellular proteins			(M13096)SA PROGRAMMED CELL DEATH; (M136)PID FOXO PATHWAY; (M153)PID P75 NTR PATHWAY	(M5941)HALLMARK UV RESPONSE UP; (M5902)HALLMARK APOPTOSIS; (M5893)HALLMARK MITOTIC SPINDLE	0	1	0	0	0	0	0	0	1	1	0	0	0	0	0	0	0	0	0	0	1
338328	Gpihbp1	0	1	338328	Gene_ID	H. sapiens	338328	H. sapiens	GPIHBP1	glycosylphosphatidylinositol anchored high density lipoprotein binding protein 1	GO:0090320 regulation of chylomicron remnant clearance;GO:0090321 positive regulation of chylomicron remnant clearance;GO:0071503 response to heparin		Disease related genes; Predicted intracellular proteins					0	0	0	0	0	0	0	0	0	0	0	0	1	0	0	0	0	0	0	0	1
55636	Chd7	0	1	55636	Gene_ID	H. sapiens	55636	H. sapiens	CHD7	chromodomain helicase DNA binding protein 7	GO:0003226 right ventricular compact myocardium morphogenesis;GO:0003221 right ventricular cardiac muscle tissue morphogenesis;GO:0021553 olfactory nerve development		Predicted intracellular proteins; Disease related genes; ENZYME proteins:Hydrolases; Cancer-related genes:Candidate cancer biomarkers; Enzymes; Potential drug targets	Nucleoplasm (reliability']); Additional: Nucleoli		(M23)PID WNT NONCANONICAL PATHWAY		0	0	1	0	1	0	0	0	0	0	0	0	0	0	0	0	0	1	0	0	1
84549	Mak16	1	0	84549	Gene_ID	H. sapiens	84549	H. sapiens	MAK16	MAK16 homolog	GO:0000470 maturation of LSU-rRNA;GO:0000460 maturation of 5.8S rRNA;GO:0042273 ribosomal large subunit biogenesis		Predicted intracellular proteins	Nucleoli (reliability']); Additional: Vesicles				0	0	0	0	0	0	0	0	0	0	0	0	0	0	0	0	0	0	0	0	1
1593	Cyp27a1	0	1	1593	Gene_ID	H. sapiens	1593	H. sapiens	CYP27A1	cytochrome P450 family 27 subfamily A member 1	GO:0036378 calcitriol biosynthetic process from calciol;GO:0044107 cellular alcohol metabolic process;GO:0044108 cellular alcohol biosynthetic process		ENZYME proteins:Oxidoreductases; Predicted intracellular proteins; Disease related genes; Enzymes; Potential drug targets	Mitochondria (reliability'])			(M5948)HALLMARK BILE ACID METABOLISM; (M5934)HALLMARK XENOBIOTIC METABOLISM	0	0	0	0	0	0	0	0	0	0	1	0	0	0	0	0	0	0	0	0	1
55034	Mocos	1	0	55034	Gene_ID	H. sapiens	55034	H. sapiens	MOCOS	molybdenum cofactor sulfurase	GO:0006777 Mo-molybdopterin cofactor biosynthetic process;GO:0019720 Mo-molybdopterin cofactor metabolic process;GO:0043545 molybdopterin cofactor metabolic process		Predicted intracellular proteins; Disease related genes; Enzymes; Potential drug targets; ENZYME proteins:Transferases	Mitochondria (reliability']); Additional: Cytosol	Pyridoxal phosphate		(M5945)HALLMARK HEME METABOLISM	0	0	0	1	0	0	0	0	0	0	0	0	0	0	0	0	0	0	0	0	1
7356	Scgb1a1	1	0	7356	Gene_ID	H. sapiens	7356	H. sapiens	SCGB1A1	secretoglobin family 1A member 1	GO:0034021 response to silicon dioxide;GO:0010193 response to ozone;GO:0032696 negative regulation of interleukin-13 production		Cancer-related genes:Candidate cancer biomarkers; Predicted secreted proteins; Predicted intracellular proteins		4,4'-BIS([H]METHYLSULFONYL)-2,2',5,5'-TETRACHLOROBIPHENYL	(M285)PID HNF3A PATHWAY	(M5949)HALLMARK PEROXISOME; (M5956)HALLMARK KRAS SIGNALING DN	0	0	1	0	0	0	0	0	0	1	0	0	0	1	1	1	1	0	0	0	1
915	Cd3d	0	1	915	Gene_ID	H. sapiens	915	H. sapiens	CD3D	CD3d molecule	GO:0045059 positive thymic T cell selection;GO:0045061 thymic T cell selection;GO:0043368 positive T cell selection		CD markers; Disease related genes; Predicted intracellular proteins; FDA approved drug targets:Biotech drugs		Muromonab; Blinatumomab	(M290)PID IL12 STAT4 PATHWAY; (M88)PID CD8 TCR PATHWAY; (M54)PID IL12 2PATHWAY	(M5950)HALLMARK ALLOGRAFT REJECTION	0	0	1	0	0	0	0	0	0	0	0	0	0	0	0	0	0	0	0	0	1
57126	Cd177	1	0	57126	Gene_ID	H. sapiens	57126	H. sapiens	CD177	CD177 molecule	GO:0043315 positive regulation of neutrophil degranulation;GO:1902565 positive regulation of neutrophil activation;GO:0043313 regulation of neutrophil degranulation		Predicted intracellular proteins					1	0	1	0	0	0	0	0	0	0	0	1	0	0	0	0	0	0	1	1	1
3006	Hist1h1c	1	0	3006	Gene_ID	H. sapiens	3006	H. sapiens	H1-2	H1.2 linker histone, cluster member	GO:0098532 histone H3-K27 trimethylation;GO:0016584 nucleosome positioning;GO:0031936 negative regulation of chromatin silencing		Predicted intracellular proteins	Nucleoli;Nucleoplasm (reliability'])			(M5939)HALLMARK P53 PATHWAY	0	0	0	0	0	0	0	0	0	0	0	0	0	0	0	0	0	0	0	0	1
2969	Gtf2i	0	1	2969	Gene_ID	H. sapiens	2969	H. sapiens	GTF2I	general transcription factor IIi	GO:0100026 positive regulation of DNA repair by transcription from RNA polymerase II promoter;GO:0051481 negative regulation of cytosolic calcium ion concentration;GO:0045739 positive regulation of DNA repair		Disease related genes; Predicted intracellular proteins	Nucleoplasm (reliability'])				0	0	0	0	1	0	0	0	0	0	0	0	0	0	0	0	0	0	0	0	1
3627	Cxcl10	1	0	3627	Gene_ID	H. sapiens	3627	H. sapiens	CXCL10	C-X-C motif chemokine ligand 10	GO:1901740 negative regulation of myoblast fusion;GO:0034242 negative regulation of syncytium formation by plasma membrane fusion;GO:1901509 regulation of endothelial tube morphogenesis		Cancer-related genes:Candidate cancer biomarkers; Predicted secreted proteins		N-Methylleucine; Eldelumab; Clove oil	(M222)PID CXCR3 PATHWAY; (M5883)NABA SECRETED FACTORS; (M5885)NABA MATRISOME ASSOCIATED	(M5897)HALLMARK IL6 JAK STAT3 SIGNALING; (M5911)HALLMARK INTERFERON ALPHA RESPONSE; (M5947)HALLMARK IL2 STAT5 SIGNALING	0	0	0	0	1	1	0	0	0	1	0	1	0	0	0	1	0	1	0	0	1
25927	Cnrip1	1	0	25927	Gene_ID	H. sapiens	25927	H. sapiens	CNRIP1	cannabinoid receptor interacting protein 1	GO:2000272 negative regulation of signaling receptor activity;GO:0010469 regulation of signaling receptor activity;GO:0044092 negative regulation of molecular function		Predicted intracellular proteins	Cytosol (reliability'])				0	0	0	0	0	0	0	0	0	0	0	0	0	0	0	0	0	0	0	0	1
3099	Hk2	0	1	3099	Gene_ID	H. sapiens	3099	H. sapiens	HK2	hexokinase 2	GO:0072656 maintenance of protein location in mitochondrion;GO:0035795 negative regulation of mitochondrial membrane permeability;GO:1905709 negative regulation of membrane permeability		Cancer-related genes:Candidate cancer biomarkers; ENZYME proteins:Transferases; Predicted intracellular proteins; Enzymes			(M255)PID HIF1 TFPATHWAY	(M5928)HALLMARK MYC TARGETS V2; (M5947)HALLMARK IL2 STAT5 SIGNALING; (M5891)HALLMARK HYPOXIA	0	1	0	1	1	0	0	0	0	0	1	0	0	0	0	0	0	0	0	1	1
391	Rhog	1	0	391	Gene_ID	H. sapiens	391	H. sapiens	RHOG	ras homolog family member G	GO:0043652 engulfment of apoptotic cell;GO:0008045 motor neuron axon guidance;GO:1900027 regulation of ruffle assembly		Predicted intracellular proteins			(M71)PID ILK PATHWAY; (M187)PID TRKR PATHWAY	(M5921)HALLMARK COMPLEMENT; (M5932)HALLMARK INFLAMMATORY RESPONSE	1	0	0	0	0	0	0	1	0	0	0	1	0	0	0	0	0	0	0	0	1
10476	Atp5h	0	1	10476	Gene_ID	H. sapiens	10476	H. sapiens	ATP5PD	ATP synthase peripheral stalk subunit d	GO:0042776 mitochondrial ATP synthesis coupled proton transport;GO:0015985 energy coupled proton transport, down electrochemical gradient;GO:0015986 ATP synthesis coupled proton transport		Predicted intracellular proteins	Mitochondria (reliability'])			(M5936)HALLMARK OXIDATIVE PHOSPHORYLATION	0	1	0	1	0	0	0	0	0	0	0	0	0	0	0	0	0	0	0	0	1
54958	Tmem160	0	1	54958	Gene_ID	H. sapiens	54958	H. sapiens	TMEM160	transmembrane protein 160								0	0	0	0	0	0	0	0	0	0	0	0	0	0	0	0	0	0	0	0	1
4036	Lrp2	1	0	4036	Gene_ID	H. sapiens	4036	H. sapiens	LRP2	LDL receptor related protein 2	GO:1905167 positive regulation of lysosomal protein catabolic process;GO:0070447 positive regulation of oligodendrocyte progenitor proliferation;GO:1904352 positive regulation of protein catabolic process in the vacuole		Transporters; Disease related genes; Predicted intracellular proteins; Potential drug targets	Mitochondria;Vesicles (reliability'])	Urokinase; Insulin pork; Gentamicin	(M211)PID HEDGEHOG 2PATHWAY		0	0	0	0	1	0	1	0	0	0	1	0	0	1	0	0	0	1	0	0	1
29103	Dnajc15	0	1	29103	Gene_ID	H. sapiens	29103	H. sapiens	DNAJC15	DnaJ heat shock protein family (Hsp40) member C15	GO:1902957 negative regulation of mitochondrial electron transport, NADH to ubiquinone;GO:1905447 negative regulation of mitochondrial ATP synthesis coupled electron transport;GO:1901856 negative regulation of cellular respiration		Disease related genes				(M5905)HALLMARK ADIPOGENESIS	0	1	0	1	0	0	1	0	0	0	0	0	0	0	0	0	0	0	0	0	1
10194	Tshz1	0	1	10194	Gene_ID	H. sapiens	10194	H. sapiens	TSHZ1	teashirt zinc finger homeobox 1	GO:0060023 soft palate development;GO:0042474 middle ear morphogenesis;GO:0062009 secondary palate development		Transcription factors:Helix-turn-helix domains; Disease related genes; Predicted intracellular proteins	Nucleoplasm (reliability'])				0	0	0	0	0	0	0	0	0	0	0	0	0	0	0	0	0	0	0	0	1
1675	Cfd	1	0	1675	Gene_ID	H. sapiens	1675	H. sapiens	CFD	complement factor D	GO:0006957 complement activation, alternative pathway;GO:0002576 platelet degranulation;GO:0006956 complement activation		Peptidases:Serine-type peptidases; Disease related genes; ENZYME proteins:Hydrolases; Predicted secreted proteins; Enzymes; Potential drug targets		2-Aminobenzyl alcohol; 3,4-Dichloroisocoumarin		(M5946)HALLMARK COAGULATION; (M5909)HALLMARK MYOGENESIS	1	0	0	0	0	0	0	0	0	0	0	0	0	0	0	0	0	0	0	0	1
128637	Tbc1d20	1	0	128637	Gene_ID	H. sapiens	128637	H. sapiens	TBC1D20	TBC1 domain family member 20	GO:1902953 positive regulation of ER to Golgi vesicle-mediated transport;GO:0046726 positive regulation by virus of viral protein levels in host cell;GO:0070309 lens fiber cell morphogenesis		Disease related genes					0	0	0	0	0	0	0	0	0	0	0	0	0	0	0	0	0	1	0	0	1
8572	Pdlim4	1	0	8572	Gene_ID	H. sapiens	8572	H. sapiens	PDLIM4	PDZ and LIM domain 4	GO:0098976 excitatory chemical synaptic transmission;GO:0031532 actin cytoskeleton reorganization;GO:0007507 heart development		Predicted intracellular proteins	Actin filaments;Cytosol (reliability'])			(M5930)HALLMARK EPITHELIAL MESENCHYMAL TRANSITION	0	0	0	0	0	0	0	1	0	0	0	0	0	0	0	0	0	1	0	0	1
5612	Prkrir	1	0	5612	Gene_ID	H. sapiens	5612	H. sapiens	THAP12	THAP domain containing 12	GO:0008285 negative regulation of cell proliferation;GO:0042127 regulation of cell proliferation;GO:0008283 cell proliferation		Transcription factors:Zinc-coordinating DNA-binding domains	Nucleoplasm (reliability'])				0	0	0	0	0	0	0	0	0	0	0	0	0	0	0	0	0	0	0	0	1
4634	Myl3	1	0	4634	Gene_ID	H. sapiens	4634	H. sapiens	MYL3	myosin light chain 3	GO:0002026 regulation of the force of heart contraction;GO:0030049 muscle filament sliding;GO:0033275 actin-myosin filament sliding		Candidate cardiovascular disease genes; Disease related genes; Predicted intracellular proteins	Mitochondria;Nucleoli (reliability'])			(M5909)HALLMARK MYOGENESIS	0	0	0	0	0	0	1	0	0	0	0	0	0	0	0	0	0	1	0	0	1
54675	Crls1	0	1	54675	Gene_ID	H. sapiens	54675	H. sapiens	CRLS1	cardiolipin synthase 1	GO:1905711 response to phosphatidylethanolamine;GO:0097068 response to thyroxine;GO:1904386 response to L-phenylalanine derivative		ENZYME proteins:Transferases; Enzymes					0	0	0	1	0	0	0	0	0	0	1	0	0	0	0	0	0	0	0	0	1
60673	Atg101	0	1	60673	Gene_ID	H. sapiens	60673	H. sapiens	ATG101	autophagy related 101	GO:0000045 autophagosome assembly;GO:1905037 autophagosome organization;GO:0007033 vacuole organization		Transporters; Predicted intracellular proteins					0	0	0	0	0	0	0	0	0	0	0	0	0	0	0	0	0	0	0	0	1
157313	Cdca2	1	0	157313	Gene_ID	H. sapiens	157313	H. sapiens	CDCA2	cell division cycle associated 2	GO:0035307 positive regulation of protein dephosphorylation;GO:0035306 positive regulation of dephosphorylation;GO:0035304 regulation of protein dephosphorylation		Predicted intracellular proteins	Nucleoplasm (reliability'])				0	0	0	0	0	0	0	0	0	0	0	0	0	0	0	0	0	0	0	0	1
991	Cdc20	1	0	991	Gene_ID	H. sapiens	991	H. sapiens	CDC20	cell division cycle 20	GO:1905784 regulation of anaphase-promoting complex-dependent catabolic process;GO:1905786 positive regulation of anaphase-promoting complex-dependent catabolic process;GO:0090129 positive regulation of synapse maturation		Cancer-related genes:Candidate cancer biomarkers; Predicted intracellular proteins	Cytosol;Nucleoplasm (reliability'])		(M129)PID PLK1 PATHWAY	(M5901)HALLMARK G2M CHECKPOINT; (M5907)HALLMARK ESTROGEN RESPONSE LATE; (M5925)HALLMARK E2F TARGETS	0	0	0	0	0	0	0	0	0	0	0	0	0	0	0	0	0	0	0	0	1
9172	Myom2	1	0	9172	Gene_ID	H. sapiens	9172	H. sapiens	MYOM2	myomesin 2	GO:0002074 extraocular skeletal muscle development;GO:0007519 skeletal muscle tissue development;GO:0060538 skeletal muscle organ development		Predicted intracellular proteins	Mitochondria (reliability'])			(M5909)HALLMARK MYOGENESIS	0	0	0	0	0	0	1	0	0	0	0	0	0	0	0	0	0	1	0	0	1
10523	Cherp	0	1	10523	Gene_ID	H. sapiens	10523	H. sapiens	CHERP	calcium homeostasis endoplasmic reticulum protein	GO:0070886 positive regulation of calcineurin-NFAT signaling cascade;GO:0106058 positive regulation of calcineurin-mediated signaling;GO:0070884 regulation of calcineurin-NFAT signaling cascade		Predicted intracellular proteins					0	0	0	0	0	0	0	0	0	0	0	0	0	0	0	0	0	0	0	0	1
57645	Pogk	0	1	57645	Gene_ID	H. sapiens	57645	H. sapiens	POGK	pogo transposable element derived with KRAB domain	GO:0006355 regulation of transcription, DNA-templated;GO:1903506 regulation of nucleic acid-templated transcription;GO:2001141 regulation of RNA biosynthetic process		Predicted intracellular proteins	Nucleoplasm (reliability']); Additional: Vesicles				0	0	0	0	0	0	0	0	0	0	0	0	0	0	0	0	0	0	0	0	1
23424	Tdrd7	1	0	23424	Gene_ID	H. sapiens	23424	H. sapiens	TDRD7	tudor domain containing 7	GO:0002089 lens morphogenesis in camera-type eye;GO:0070306 lens fiber cell differentiation;GO:0002088 lens development in camera-type eye		Disease related genes; Predicted intracellular proteins	Cytoplasmic bodies (reliability']); Additional: Nucleoplasm		(M242)PID AURORA A PATHWAY	(M5911)HALLMARK INTERFERON ALPHA RESPONSE; (M5913)HALLMARK INTERFERON GAMMA RESPONSE	0	0	0	0	0	0	0	0	0	0	0	0	0	0	0	0	0	0	0	0	1
5817	Pvr	1	0	5817	Gene_ID	H. sapiens	5817	H. sapiens	PVR	PVR cell adhesion molecule	GO:0060370 susceptibility to T cell mediated cytotoxicity;GO:0042271 susceptibility to natural killer cell mediated cytotoxicity;GO:0002860 positive regulation of natural killer cell mediated cytotoxicity directed against tumor cell target		CD markers; Predicted secreted proteins; Predicted intracellular proteins	Nucleoplasm;Plasma membrane;Vesicles (reliability'])	Sphingosine; Myristic acid	(M72)PID NECTIN PATHWAY; (M53)PID INTEGRIN3 PATHWAY	(M5930)HALLMARK EPITHELIAL MESENCHYMAL TRANSITION; (M5932)HALLMARK INFLAMMATORY RESPONSE	0	0	0	0	0	0	0	0	0	0	0	0	0	0	0	0	0	0	0	0	1
7726	Trim26	0	1	7726	Gene_ID	H. sapiens	7726	H. sapiens	TRIM26	tripartite motif containing 26	GO:1902187 negative regulation of viral release from host cell;GO:0046597 negative regulation of viral entry into host cell;GO:1902186 regulation of viral release from host cell		ENZYME proteins:Transferases; Predicted intracellular proteins; Enzymes	Cytosol;Nucleoplasm (reliability'])			(M5911)HALLMARK INTERFERON ALPHA RESPONSE; (M5913)HALLMARK INTERFERON GAMMA RESPONSE	0	0	0	0	0	0	0	0	0	0	0	0	0	0	0	0	0	0	0	0	1
57642	Col20a1	0	1	57642	Gene_ID	H. sapiens	57642	H. sapiens	COL20A1	collagen type XX alpha 1 chain			Predicted secreted proteins; Predicted intracellular proteins			(M3005)NABA COLLAGENS; (M5884)NABA CORE MATRISOME; (M5889)NABA MATRISOME		0	0	0	0	0	0	0	0	0	0	0	0	1	0	0	0	0	0	0	0	1
23637	Rabgap1	0	1	23637	Gene_ID	H. sapiens	23637	H. sapiens	RABGAP1	RAB GTPase activating protein 1	GO:1902017 regulation of cilium assembly;GO:0090630 activation of GTPase activity;GO:0120032 regulation of plasma membrane bounded cell projection assembly		Predicted intracellular proteins	Cytosol (reliability'])			(M5893)HALLMARK MITOTIC SPINDLE	0	0	0	0	0	0	0	0	0	0	0	0	0	0	0	0	0	0	0	0	1
6428	Srsf3	1	0	6428	Gene_ID	H. sapiens	6428	H. sapiens	SRSF3	serine and arginine rich splicing factor 3	GO:0045292 mRNA cis splicing, via spliceosome;GO:0000381 regulation of alternative mRNA splicing, via spliceosome;GO:0000380 alternative mRNA splicing, via spliceosome		Predicted intracellular proteins; Cancer-related genes	Nucleoplasm (reliability'])			(M5926)HALLMARK MYC TARGETS V1	0	0	0	0	0	0	0	0	0	0	0	0	0	0	0	0	0	0	0	0	1
266629	Sec14l3	1	0	266629	Gene_ID	H. sapiens	266629	H. sapiens	SEC14L3	SEC14 like lipid binding 3			Predicted intracellular proteins		Vitamin E; alpha-Tocopherol succinate; D-alpha-Tocopherol acetate			0	0	0	0	0	0	0	0	0	0	0	0	0	0	0	0	0	0	0	0	1
24149	Zfp318	1	0	24149	Gene_ID	H. sapiens	24149	H. sapiens	ZNF318	zinc finger protein 318	GO:0051321 meiotic cell cycle;GO:0045892 negative regulation of transcription, DNA-templated;GO:1903507 negative regulation of nucleic acid-templated transcription		Predicted intracellular proteins	Nucleoplasm (reliability']); Additional: Cytosol		(M58)PID AR PATHWAY		0	0	0	0	0	0	0	0	0	0	0	0	0	0	0	0	0	0	0	0	1
23225	Nup210	0	1	23225	Gene_ID	H. sapiens	23225	H. sapiens	NUP210	nucleoporin 210	GO:0006409 tRNA export from nucleus;GO:0071431 tRNA-containing ribonucleoprotein complex export from nucleus;GO:0051031 tRNA transport		Transporters:Transporter channels and pores					0	1	0	1	0	0	0	0	0	0	1	0	0	0	0	0	0	0	0	0	1
64332	Nfkbiz	0	1	64332	Gene_ID	H. sapiens	64332	H. sapiens	NFKBIZ	NFKB inhibitor zeta	GO:2000321 positive regulation of T-helper 17 cell differentiation;GO:2000318 positive regulation of T-helper 17 type immune response;GO:2000319 regulation of T-helper 17 cell differentiation		Predicted intracellular proteins; Transcription factors:Immunoglobulin fold	Nuclear speckles (reliability']); Additional: Cytoplasmic bodies			(M5947)HALLMARK IL2 STAT5 SIGNALING	0	0	1	0	0	0	0	0	0	0	0	1	0	0	0	0	0	0	0	0	1
81631	Map1lc3b	1	0	81631	Gene_ID	H. sapiens	81631	H. sapiens	MAP1LC3B	microtubule associated protein 1 light chain 3 beta	GO:0006995 cellular response to nitrogen starvation;GO:0043562 cellular response to nitrogen levels;GO:0000423 mitophagy		Predicted intracellular proteins	Vesicles (reliability']); Additional: Nucleoplasm				0	0	0	0	0	0	0	0	0	0	0	0	0	0	0	0	0	0	0	0	1
8021	Nup214	0	1	8021	Gene_ID	H. sapiens	8021	H. sapiens	NUP214	nucleoporin 214	GO:0006409 tRNA export from nucleus;GO:0071431 tRNA-containing ribonucleoprotein complex export from nucleus;GO:0051031 tRNA transport		Predicted intracellular proteins; Disease related genes; Cancer-related genes:Mutational cancer driver genes; Transporters:Transporter channels and pores; Potential drug targets	Nucleoplasm (reliability']); Additional: Focal adhesion sites;Vesicles		(M228)PID SMAD2 3PATHWAY; (M181)PID BMP PATHWAY; (M113)PID NFAT 3PATHWAY		0	1	0	1	0	0	0	0	0	0	1	0	0	0	0	0	0	0	0	0	1
2027	Eno3	1	0	2027	Gene_ID	H. sapiens	2027	H. sapiens	ENO3	enolase 3	GO:0032889 regulation of vacuole fusion, non-autophagic;GO:0042144 vacuole fusion, non-autophagic;GO:0097576 vacuole fusion		Predicted intracellular proteins; Disease related genes; ENZYME proteins:Lyases; Enzymes; Potential drug targets; Candidate cardiovascular disease genes	Cytosol;Plasma membrane (reliability'])	2-phospho-D-glyceric acid; Phosphoenolpyruvate; 2-Phosphoglycolic Acid; Phosphonoacetohydroxamic Acid		(M5935)HALLMARK FATTY ACID METABOLISM; (M5947)HALLMARK IL2 STAT5 SIGNALING; (M5891)HALLMARK HYPOXIA	0	1	0	1	0	0	0	0	0	0	1	0	0	0	0	0	0	0	0	1	1
2978	Guca1a	0	1	2978	Gene_ID	H. sapiens	2978	H. sapiens	GUCA1A	guanylate cyclase activator 1A	GO:0031284 positive regulation of guanylate cyclase activity;GO:0031282 regulation of guanylate cyclase activity;GO:0031281 positive regulation of cyclase activity		Disease related genes; Predicted intracellular proteins	Plasma membrane (reliability'])	Myristic acid	(M117)PID CONE PATHWAY; (M204)PID RHODOPSIN PATHWAY		0	0	0	1	0	0	0	0	0	0	0	0	0	0	0	0	1	0	0	0	1
11051	Nudt21	0	1	11051	Gene_ID	H. sapiens	11051	H. sapiens	NUDT21	nudix hydrolase 21	GO:0031437 regulation of mRNA cleavage;GO:0031439 positive regulation of mRNA cleavage;GO:2000975 positive regulation of pro-B cell differentiation		Predicted intracellular proteins	Nuclear bodies (reliability']); Additional: Centriolar satellite			(M5898)HALLMARK DNA REPAIR; (M5925)HALLMARK E2F TARGETS	0	0	0	0	0	0	0	0	0	0	0	0	0	0	0	0	0	0	0	0	1
51101	Zc2hc1a	1	0	51101	Gene_ID	H. sapiens	51101	H. sapiens	ZC2HC1A	zinc finger C2HC-type containing 1A			Predicted intracellular proteins	Cytosol (reliability']); Additional: Actin filaments				0	0	0	0	0	0	0	0	0	0	0	0	0	0	0	0	0	0	0	0	1
23321	Trim2	1	0	23321	Gene_ID	H. sapiens	23321	H. sapiens	TRIM2	tripartite motif containing 2	GO:0043523 regulation of neuron apoptotic process;GO:0051402 neuron apoptotic process;GO:1901214 regulation of neuron death		Predicted intracellular proteins; Disease related genes; Enzymes; Potential drug targets; ENZYME proteins:Transferases	Centrosome (reliability'])				0	0	0	0	0	0	0	0	0	0	0	0	0	0	0	0	0	0	0	0	1
96764	Tgs1	1	0	96764	Gene_ID	H. sapiens	96764	H. sapiens	TGS1	trimethylguanosine synthase 1	GO:0036261 7-methylguanosine cap hypermethylation;GO:0009452 7-methylguanosine RNA capping;GO:0036260 RNA capping		Predicted intracellular proteins	Cytosol (reliability'])				0	0	0	0	0	0	0	0	0	0	1	0	0	0	0	0	0	0	0	0	1
3223	Hoxc6	1	0	3223	Gene_ID	H. sapiens	3223	H. sapiens	HOXC6	homeobox C6	GO:0048706 embryonic skeletal system development;GO:0009952 anterior/posterior pattern specification;GO:0003002 regionalization		Transcription factors:Helix-turn-helix domains; Predicted intracellular proteins	Nucleoplasm (reliability']); Additional: Cytosol				0	0	0	0	0	0	0	0	0	0	0	0	0	0	0	0	0	0	0	0	1
79080	Ccdc86	1	0	79080	Gene_ID	H. sapiens	79080	H. sapiens	CCDC86	coiled-coil domain containing 86	GO:0016032 viral process;GO:0044403 symbiont process;GO:0044419 interspecies interaction between organisms		Predicted intracellular proteins	Nucleoli (reliability']); Additional: Nucleoplasm				0	0	0	0	0	0	0	0	0	0	0	0	0	0	0	0	0	0	0	0	1
113419	Tex261	1	0	113419	Gene_ID	H. sapiens	113419	H. sapiens	TEX261	testis expressed 261	GO:0006888 ER to Golgi vesicle-mediated transport;GO:0048193 Golgi vesicle transport;GO:0046907 intracellular transport			Cytosol;Nucleoplasm (reliability'])				0	0	0	0	0	0	0	0	0	0	0	0	0	0	0	0	0	0	0	0	1
388	Rhob	1	0	388	Gene_ID	H. sapiens	388	H. sapiens	RHOB	ras homolog family member B	GO:0003159 morphogenesis of an endothelium;GO:0061154 endothelial tube morphogenesis;GO:0030865 cortical cytoskeleton organization		Cancer-related genes:Candidate cancer biomarkers; Predicted intracellular proteins		Botulinum toxin type A	(M153)PID P75 NTR PATHWAY; (M124)PID CXCR4 PATHWAY	(M5941)HALLMARK UV RESPONSE UP; (M5902)HALLMARK APOPTOSIS; (M5947)HALLMARK IL2 STAT5 SIGNALING	0	0	0	0	1	1	0	1	0	0	0	0	0	0	0	0	1	0	0	0	1
53	Acp2	1	0	53	Gene_ID	H. sapiens	53	H. sapiens	ACP2	acid phosphatase 2, lysosomal	GO:0007040 lysosome organization;GO:0080171 lytic vacuole organization;GO:0007033 vacuole organization		Predicted intracellular proteins; Disease related genes; ENZYME proteins:Hydrolases; Enzymes; Potential drug targets				(M5934)HALLMARK XENOBIOTIC METABOLISM	0	0	0	0	0	0	0	0	0	0	0	0	0	0	0	0	0	0	0	0	1
79671	Nlrx1	1	0	79671	Gene_ID	H. sapiens	79671	H. sapiens	NLRX1	NLR family member X1	GO:0039536 negative regulation of RIG-I signaling pathway;GO:0039532 negative regulation of viral-induced cytoplasmic pattern recognition receptor signaling pathway;GO:0032688 negative regulation of interferon-beta production		Predicted intracellular proteins	Mitochondria (reliability']); Additional: Cell Junctions;Plasma membrane				0	0	0	0	0	0	0	0	0	1	0	0	0	0	1	0	0	0	0	0	1
51081	Mrps7	0	1	51081	Gene_ID	H. sapiens	51081	H. sapiens	MRPS7	mitochondrial ribosomal protein S7	GO:0000028 ribosomal small subunit assembly;GO:0042255 ribosome assembly;GO:0042274 ribosomal small subunit biogenesis		Ribosomal proteins; Disease related genes; Predicted intracellular proteins	Mitochondria (reliability'])				0	0	0	0	0	0	0	0	0	0	0	0	0	0	0	0	0	0	0	0	1
6345	Srl	1	0	6345	Gene_ID	H. sapiens	6345	H. sapiens	SRL	sarcalumenin	GO:0016197 endosomal transport;GO:0006897 endocytosis;GO:0098657 import into cell		Predicted intracellular proteins					0	0	0	0	0	0	0	0	0	0	0	0	0	0	0	0	0	0	0	0	1
1938	Eef2	1	0	1938	Gene_ID	H. sapiens	1938	H. sapiens	EEF2	eukaryotic translation elongation factor 2	GO:0051593 response to folic acid;GO:1990416 cellular response to brain-derived neurotrophic factor stimulus;GO:2000767 positive regulation of cytoplasmic translation		Cancer-related genes:Candidate cancer biomarkers; Disease related genes; Predicted intracellular proteins	Cytosol;Plasma membrane (reliability'])	Adenosine-5-Diphosphoribose; Diphthamide; Guanosine-5'-Diphosphate; N~2~,N~2~-DIMETHYL-N~1~-(6-OXO-5,6-DIHYDROPHENANTHRIDIN-2-YL)GLYCINAMIDE; Esketamine; Moxetumomab Pasudotox	(M121)PID MTOR 4PATHWAY	(M5922)HALLMARK UNFOLDED PROTEIN RESPONSE	1	0	0	0	0	0	1	0	0	0	0	0	0	1	0	0	1	1	0	0	1
6446	Sgk1	0	1	6446	Gene_ID	H. sapiens	6446	H. sapiens	SGK1	serum/glucocorticoid regulated kinase 1	GO:0070294 renal sodium ion absorption;GO:0003096 renal sodium ion transport;GO:0060453 regulation of gastric acid secretion	AGC Ser/Thr protein kinase family	Predicted intracellular proteins; Kinases:AGC Ser/Thr protein kinases; Cancer-related genes:Mutational cancer driver genes; Enzymes; ENZYME proteins:Transferases; Cancer-related genes:Mutated cancer genes	Nuclear speckles (reliability'])	Flavin mononucleotide; [4-(5-naphthalen-2-yl-1H-pyrrolo[2,3-b]pyridin-3-yl)phenyl]acetic acid; 4-(5-phenyl-1H-pyrrolo[2,3-b]pyridin-3-yl)benzoic acid	(M16)PID INSULIN PATHWAY; (M141)PID PI3KCI PATHWAY; (M136)PID FOXO PATHWAY	(M5908)HALLMARK ANDROGEN RESPONSE; (M5890)HALLMARK TNFA SIGNALING VIA NFKB; (M5907)HALLMARK ESTROGEN RESPONSE LATE	0	0	0	0	0	0	0	0	0	0	0	0	0	0	0	0	0	0	0	0	1
4644	Myo5a	0	1	4644	Gene_ID	H. sapiens	4644	H. sapiens	MYO5A	myosin VA	GO:0051686 establishment of ER localization;GO:0099089 establishment of endoplasmic reticulum localization to postsynapse;GO:0031585 regulation of inositol 1,4,5-trisphosphate-sensitive calcium-release channel activity		Predicted intracellular proteins; Disease related genes; Cancer-related genes	Centriolar satellite;Focal adhesion sites (reliability'])				0	0	0	0	0	0	1	1	1	0	1	0	0	0	0	0	0	0	0	0	1
2677	Ggcx	1	0	2677	Gene_ID	H. sapiens	2677	H. sapiens	GGCX	gamma-glutamyl carboxylase	GO:0017187 peptidyl-glutamic acid carboxylation;GO:0018214 protein carboxylation;GO:0018200 peptidyl-glutamic acid modification		FDA approved drug targets:Small molecule drugs; Disease related genes; ENZYME proteins:Lyases; Enzymes		Coagulation factor VIIa Recombinant Human; Coagulation Factor IX (Recombinant); Glutamic acid; Menadione; Phylloquinone; Anisindione; Kappadione; Coagulation Factor IX Human			0	0	0	0	0	0	0	0	0	0	0	0	0	0	0	0	0	0	0	1	1
130120	Reg3g	1	0	130120	Gene_ID	H. sapiens	130120	H. sapiens	REG3G	regenerating family member 3 gamma	GO:0044278 cell wall disruption in other organism;GO:0045617 negative regulation of keratinocyte differentiation;GO:0051715 cytolysis in other organism		Predicted secreted proteins	Cytosol (reliability'])		(M5880)NABA ECM AFFILIATED; (M5885)NABA MATRISOME ASSOCIATED; (M5889)NABA MATRISOME		0	0	0	0	0	0	0	0	1	0	0	0	0	0	0	1	0	0	0	1	1
917	Cd3g	0	1	917	Gene_ID	H. sapiens	917	H. sapiens	CD3G	CD3g molecule	GO:0045059 positive thymic T cell selection;GO:0045061 thymic T cell selection;GO:0043368 positive T cell selection		CD markers; Disease related genes; Predicted intracellular proteins; FDA approved drug targets:Biotech drugs	Cytosol;Plasma membrane (reliability'])	Muromonab	(M290)PID IL12 STAT4 PATHWAY; (M88)PID CD8 TCR PATHWAY; (M54)PID IL12 2PATHWAY	(M5950)HALLMARK ALLOGRAFT REJECTION	0	0	1	0	0	0	0	0	0	0	0	0	0	0	0	0	0	0	0	0	1
91522	Col23a1	1	0	91522	Gene_ID	H. sapiens	91522	H. sapiens	COL23A1	collagen type XXIII alpha 1 chain	GO:0030198 extracellular matrix organization;GO:0043062 extracellular structure organization;GO:0016043 cellular component organization		Predicted intracellular proteins			(M3005)NABA COLLAGENS; (M5884)NABA CORE MATRISOME; (M5889)NABA MATRISOME		0	0	0	0	0	0	0	0	0	0	0	0	1	0	0	0	0	0	0	0	1
196528	Arid2	0	1	196528	Gene_ID	H. sapiens	196528	H. sapiens	ARID2	AT-rich interaction domain 2	GO:0060982 coronary artery morphogenesis;GO:1905168 positive regulation of double-strand break repair via homologous recombination;GO:0006337 nucleosome disassembly		Transcription factors:Helix-turn-helix domains; Cancer-related genes:Mutational cancer driver genes; Predicted intracellular proteins; Cancer-related genes:Mutated cancer genes	Nucleoplasm (reliability']); Additional: Plasma membrane				0	0	0	0	1	0	0	0	0	0	0	0	0	0	0	0	0	1	0	0	1
202333	Cmya5	1	0	202333	Gene_ID	H. sapiens	202333	H. sapiens	CMYA5	cardiomyopathy associated 5			Predicted intracellular proteins					0	0	0	0	0	0	0	0	0	0	0	0	0	0	0	0	0	0	0	0	1
10553	Htatip2	1	0	10553	Gene_ID	H. sapiens	10553	H. sapiens	HTATIP2	HIV-1 Tat interactive protein 2	GO:0051170 import into nucleus;GO:0046777 protein autophosphorylation;GO:0006913 nucleocytoplasmic transport		Predicted intracellular proteins	Cytosol (reliability'])	Polyethylene glycol 400		(M5945)HALLMARK HEME METABOLISM	0	0	0	0	1	0	0	0	0	0	0	0	0	0	0	0	0	0	0	0	1
60343	Fam3a	1	0	60343	Gene_ID	H. sapiens	60343	H. sapiens	FAM3A	FAM3 metabolism regulating signaling molecule A	GO:1905035 negative regulation of antifungal innate immune response;GO:1905034 regulation of antifungal innate immune response;GO:1900150 regulation of defense response to fungus		Predicted secreted proteins; Predicted intracellular proteins	Nucleoli (reliability']); Additional: Nucleoplasm				0	0	0	0	0	0	0	0	0	0	0	0	0	0	1	0	0	0	0	0	1
9351	Slc9a3r2	1	0	9351	Gene_ID	H. sapiens	9351	H. sapiens	SLC9A3R2	SLC9A3 regulator 2	GO:0072659 protein localization to plasma membrane;GO:1990778 protein localization to cell periphery;GO:0072657 protein localization to membrane		Transporters:Accessory Factors Involved in Transport; Predicted intracellular proteins	Plasma membrane (reliability'])		(M15)PID LYSOPHOSPHOLIPID PATHWAY; (M186)PID PDGFRB PATHWAY		0	0	0	0	0	0	0	0	0	0	0	0	0	0	0	0	0	0	0	0	1
51778	Myoz2	1	0	51778	Gene_ID	H. sapiens	51778	H. sapiens	MYOZ2	myozenin 2	GO:0043503 skeletal muscle fiber adaptation;GO:0070885 negative regulation of calcineurin-NFAT signaling cascade;GO:0106057 negative regulation of calcineurin-mediated signaling		Disease related genes; Predicted intracellular proteins	Cytosol;Nucleoplasm (reliability'])				0	0	0	0	0	0	1	1	0	0	0	0	0	0	0	0	0	1	0	0	1
6262	Ryr2	1	0	6262	Gene_ID	H. sapiens	6262	H. sapiens	RYR2	ryanodine receptor 2	GO:0098907 regulation of SA node cell action potential;GO:0003220 left ventricular cardiac muscle tissue morphogenesis;GO:0098904 regulation of AV node cell action potential		FDA approved drug targets:Small molecule drugs; Disease related genes; Transporters:Transporter channels and pores	Cytosol;Nucleoplasm;Plasma membrane (reliability'])	Flecainide; Tetracaine		(M5956)HALLMARK KRAS SIGNALING DN	0	0	0	0	0	0	1	1	1	1	0	0	0	0	0	0	1	1	0	0	1
91947	Arrdc4	1	0	91947	Gene_ID	H. sapiens	91947	H. sapiens	ARRDC4	arrestin domain containing 4	GO:0140112 extracellular vesicle biogenesis;GO:0051443 positive regulation of ubiquitin-protein transferase activity;GO:0051438 regulation of ubiquitin-protein transferase activity		Predicted intracellular proteins	Plasma membrane (reliability']); Additional: Vesicles				0	0	0	0	0	0	0	0	0	0	0	0	0	0	0	0	0	0	0	0	1
8853	Asap2	1	0	8853	Gene_ID	H. sapiens	8853	H. sapiens	ASAP2	ArfGAP with SH3 domain, ankyrin repeat and PH domain 2	GO:0043547 positive regulation of GTPase activity;GO:0043087 regulation of GTPase activity;GO:0051345 positive regulation of hydrolase activity		Predicted intracellular proteins	Cytosol (reliability'])		(M67)PID ARF6 TRAFFICKING PATHWAY		0	0	0	0	0	0	0	0	0	0	0	0	0	0	0	0	0	0	0	0	1
3552	Il1a	1	0	3552	Gene_ID	H. sapiens	3552	H. sapiens	IL1A	interleukin 1 alpha	GO:0033092 positive regulation of immature T cell proliferation in thymus;GO:0033091 positive regulation of immature T cell proliferation;GO:0002248 connective tissue replacement involved in inflammatory response wound healing		Cancer-related genes:Candidate cancer biomarkers; Predicted secreted proteins; Predicted intracellular proteins; Transporters:Transporter channels and pores		Rilonacept	(M110)PID IL1 PATHWAY; (M239)PID A6B1 A6B4 INTEGRIN PATHWAY; (M236)PID DELTA NP63 PATHWAY	(M5902)HALLMARK APOPTOSIS; (M5890)HALLMARK TNFA SIGNALING VIA NFKB; (M5932)HALLMARK INFLAMMATORY RESPONSE	0	1	1	0	1	0	0	0	0	1	0	1	0	0	0	1	1	0	1	1	1
9173	Il1rl1	0	1	9173	Gene_ID	H. sapiens	9173	H. sapiens	IL1RL1	interleukin 1 receptor like 1	GO:0038172 interleukin-33-mediated signaling pathway;GO:0002826 negative regulation of T-helper 1 type immune response;GO:0090197 positive regulation of chemokine secretion		Candidate cardiovascular disease genes; Predicted secreted proteins; Predicted intracellular proteins	Plasma membrane (reliability']); Additional: Cytosol;Focal adhesion sites			(M5947)HALLMARK IL2 STAT5 SIGNALING	0	0	0	0	0	0	0	0	0	0	0	1	0	0	1	0	0	0	0	0	1
9495	Akap5	1	0	9495	Gene_ID	H. sapiens	9495	H. sapiens	AKAP5	A-kinase anchoring protein 5	GO:1905751 positive regulation of endosome to plasma membrane protein transport;GO:1905749 regulation of endosome to plasma membrane protein transport;GO:0045762 positive regulation of adenylate cyclase activity		Transporters:Accessory Factors Involved in Transport; Predicted intracellular proteins	Nucleoplasm (reliability'])		(M235)PID TCR CALCIUM PATHWAY; (M113)PID NFAT 3PATHWAY		0	0	0	0	0	0	0	0	0	0	0	0	0	0	0	0	0	0	1	0	1
8848	Tsc22d1	0	1	8848	Gene_ID	H. sapiens	8848	H. sapiens	TSC22D1	TSC22 domain family member 1	GO:0006357 regulation of transcription by RNA polymerase II;GO:0006366 transcription by RNA polymerase II;GO:0006355 regulation of transcription, DNA-templated		Transcription factors:Basic domains; Predicted intracellular proteins	Nuclear bodies;Nucleoplasm (reliability'])			(M5908)HALLMARK ANDROGEN RESPONSE; (M5890)HALLMARK TNFA SIGNALING VIA NFKB; (M5939)HALLMARK P53 PATHWAY	0	0	0	0	0	0	0	0	0	0	0	0	0	0	0	0	0	0	0	0	1
29895	Mylpf	0	1	29895	Gene_ID	H. sapiens	29895	H. sapiens	MYLPF	myosin light chain, phosphorylatable, fast skeletal muscle	GO:0007519 skeletal muscle tissue development;GO:0060538 skeletal muscle organ development;GO:0006936 muscle contraction		Predicted intracellular proteins			(M164)PID ERBB1 DOWNSTREAM PATHWAY	(M5909)HALLMARK MYOGENESIS	0	0	0	0	0	0	0	0	0	0	0	0	0	0	0	0	0	1	0	0	1
22822	Phlda1	0	1	22822	Gene_ID	H. sapiens	22822	H. sapiens	PHLDA1	pleckstrin homology like domain family A member 1	GO:0045210 FasL biosynthetic process;GO:0000086 G2/M transition of mitotic cell cycle;GO:0044839 cell cycle G2/M phase transition		Cancer-related genes:Mutational cancer driver genes; Predicted intracellular proteins	Nucleoli (reliability']); Additional: Nucleoplasm			(M5947)HALLMARK IL2 STAT5 SIGNALING; (M5890)HALLMARK TNFA SIGNALING VIA NFKB	0	0	0	1	0	0	0	0	0	0	0	0	0	0	0	0	0	0	0	0	1
6430	Srsf5	0	1	6430	Gene_ID	H. sapiens	6430	H. sapiens	SRSF5	serine and arginine rich splicing factor 5	GO:0097421 liver regeneration;GO:0033120 positive regulation of RNA splicing;GO:0006376 mRNA splice site selection		Predicted intracellular proteins	Nucleoplasm (reliability']); Additional: Cytosol;Nucleoli				0	0	0	0	0	0	0	0	1	0	0	0	0	0	0	0	0	0	0	0	1
390916	Nudt19	0	1	390916	Gene_ID	H. sapiens	390916	H. sapiens	NUDT19	nudix hydrolase 19	GO:0006625 protein targeting to peroxisome;GO:0072662 protein localization to peroxisome;GO:0072663 establishment of protein localization to peroxisome		Predicted intracellular proteins	Cytosol;Nucleoli;Nucleoplasm (reliability'])			(M5949)HALLMARK PEROXISOME	0	0	0	0	0	0	0	0	0	0	1	0	0	0	0	0	0	0	0	0	1
84337	Elof1	0	1	84337	Gene_ID	H. sapiens	84337	H. sapiens	ELOF1	elongation factor 1 homolog	GO:0048096 chromatin-mediated maintenance of transcription;GO:0045815 positive regulation of gene expression, epigenetic;GO:0006368 transcription elongation from RNA polymerase II promoter		Predicted intracellular proteins	Cytosol (reliability'])				0	0	0	0	0	0	0	0	0	0	0	0	0	0	0	0	0	0	0	0	1
26354	Gnl3	1	0	26354	Gene_ID	H. sapiens	26354	H. sapiens	GNL3	G protein nucleolar 3	GO:1904816 positive regulation of protein localization to chromosome, telomeric region;GO:0033235 positive regulation of protein sumoylation;GO:1904814 regulation of protein localization to chromosome, telomeric region		Predicted intracellular proteins	Nucleoli (reliability']); Additional: Nuclear bodies			(M5928)HALLMARK MYC TARGETS V2; (M5926)HALLMARK MYC TARGETS V1	0	0	0	0	0	0	0	0	0	0	0	0	0	0	0	0	0	0	0	0	1
1356	Cp	0	1	1356	Gene_ID	H. sapiens	1356	H. sapiens	CP	ceruloplasmin	GO:0006825 copper ion transport;GO:0006826 iron ion transport;GO:0006879 cellular iron ion homeostasis		ENZYME proteins:Oxidoreductases; Predicted intracellular proteins; Disease related genes; Cancer-related genes:Candidate cancer biomarkers; Predicted secreted proteins; Enzymes; Potential drug targets; Candidate cardiovascular disease genes		Calcium; Iron; Zinc; Silver; Zinc acetate; Ferrous gluconate; Ferrous succinate; Ferrous ascorbate; Ferrous fumarate; Ferrous glycine sulfate; Zinc chloride; Zinc sulfate, unspecified form	(M255)PID HIF1 TFPATHWAY	(M5891)HALLMARK HYPOXIA; (M5921)HALLMARK COMPLEMENT	0	0	0	0	0	0	0	0	0	0	0	0	0	0	0	0	0	0	0	0	1
51267	Clec1a	1	0	51267	Gene_ID	H. sapiens	51267	H. sapiens	CLEC1A	C-type lectin domain family 1 member A	GO:0006952 defense response;GO:0007166 cell surface receptor signaling pathway;GO:0006950 response to stress		Predicted intracellular proteins			(M5880)NABA ECM AFFILIATED; (M5885)NABA MATRISOME ASSOCIATED; (M5889)NABA MATRISOME		0	0	0	0	0	0	0	0	0	0	0	0	0	0	0	0	0	0	0	0	1
7846	Tuba1a	1	0	7846	Gene_ID	H. sapiens	7846	H. sapiens	TUBA1A	tubulin alpha 1a	GO:0097711 ciliary basal body-plasma membrane docking;GO:0140056 organelle localization by membrane tethering;GO:0022406 membrane docking		Disease related genes; Cancer-related genes:Mutational cancer driver genes; Predicted intracellular proteins; FDA approved drug targets:Small molecule drugs	Microtubules (reliability'])	Albendazole; Vinblastine; Mebendazole; Epothilone D; Patupilone; CYT997; 2-MERCAPTO-N-[1,2,3,10-TETRAMETHOXY-9-OXO-5,6,7,9-TETRAHYDRO-BENZO[A]HEPTALEN-7-YL]ACETAMIDE; Artenimol; Phenethyl Isothiocyanate; Colchiceine	(M19)PID P73PATHWAY		0	0	0	0	0	0	0	0	0	0	0	0	0	0	0	0	0	0	0	0	1
133150	Sult1d1	1	0	133150	Gene_ID	H. sapiens	133150	H. sapiens	SULT1D1P	sulfotransferase family 1D member 1, pseudogene								0	0	0	0	0	0	0	0	0	0	0	0	0	0	0	0	0	0	0	0	1
347902	Amigo2	1	0	347902	Gene_ID	H. sapiens	347902	H. sapiens	AMIGO2	adhesion molecule with Ig like domain 2	GO:0007157 heterophilic cell-cell adhesion via plasma membrane cell adhesion molecules;GO:0051965 positive regulation of synapse assembly;GO:0051963 regulation of synapse assembly			Golgi apparatus;Plasma membrane (reliability']); Additional: Cytosol			(M5915)HALLMARK APICAL JUNCTION	0	0	0	0	0	0	0	0	0	0	0	0	0	0	0	0	0	0	0	0	1
2647	Bloc1s1	1	0	2647	Gene_ID	H. sapiens	2647	H. sapiens	BLOC1S1	biogenesis of lysosomal organelles complex 1 subunit 1	GO:0060155 platelet dense granule organization;GO:0048490 anterograde synaptic vesicle transport;GO:0099514 synaptic vesicle cytoskeletal transport		Predicted intracellular proteins					0	1	0	0	0	0	0	0	0	0	0	0	0	0	0	0	0	0	0	0	1
80176	Spsb1	0	1	80176	Gene_ID	H. sapiens	80176	H. sapiens	SPSB1	splA/ryanodine receptor domain and SOCS box containing 1	GO:0000209 protein polyubiquitination;GO:0043687 post-translational protein modification;GO:0043161 proteasome-mediated ubiquitin-dependent protein catabolic process		Predicted intracellular proteins				(M5890)HALLMARK TNFA SIGNALING VIA NFKB	0	0	0	0	0	0	0	0	0	0	0	0	0	0	0	0	0	0	0	0	1
644076	Glycam1	1	0	644076	Gene_ID	H. sapiens	644076	H. sapiens	GLYCAM1	glycosylation dependent cell adhesion molecule 1 (pseudogene)	GO:0050776 regulation of immune response;GO:0002682 regulation of immune system process;GO:0006955 immune response							0	0	0	0	0	0	0	0	0	0	0	0	0	0	0	0	0	0	0	0	1
4544	Mt2	0	1	4544	Gene_ID	H. sapiens	4544	H. sapiens	MTNR1B	melatonin receptor 1B	GO:0046010 positive regulation of circadian sleep/wake cycle, non-REM sleep;GO:0098908 regulation of neuronal action potential;GO:0045938 positive regulation of circadian sleep/wake cycle, sleep		FDA approved drug targets:Small molecule drugs; G-protein coupled receptors:GPCRs excl olfactory receptors; Predicted intracellular proteins		Ramelteon; Melatonin; Resveratrol; Agomelatine; Tasimelteon			0	0	0	0	0	0	0	0	0	0	0	0	0	0	0	0	0	0	0	0	1
11082	Esm1	1	0	11082	Gene_ID	H. sapiens	11082	H. sapiens	ESM1	endothelial cell specific molecule 1	GO:1902204 positive regulation of hepatocyte growth factor receptor signaling pathway;GO:1902202 regulation of hepatocyte growth factor receptor signaling pathway;GO:0048012 hepatocyte growth factor receptor signaling pathway		Predicted secreted proteins			(M5882)NABA PROTEOGLYCANS; (M5884)NABA CORE MATRISOME; (M5889)NABA MATRISOME		0	0	0	0	1	0	0	0	0	0	0	0	0	0	0	0	0	0	0	0	1
10668	Cgrrf1	0	1	10668	Gene_ID	H. sapiens	10668	H. sapiens	CGRRF1	cell growth regulator with ring finger domain 1	GO:0030308 negative regulation of cell growth;GO:0007050 cell cycle arrest;GO:0045926 negative regulation of growth		Predicted intracellular proteins	Nucleoplasm (reliability']); Additional: Vesicles			(M5939)HALLMARK P53 PATHWAY	0	0	0	0	0	0	0	0	0	0	0	0	0	0	0	0	0	0	0	0	1
5224	Pgam2	1	0	5224	Gene_ID	H. sapiens	5224	H. sapiens	PGAM2	phosphoglycerate mutase 2	GO:0046689 response to mercury ion;GO:0006735 NADH regeneration;GO:0061621 canonical glycolysis		Predicted intracellular proteins; ENZYME proteins:Isomerase; Disease related genes; Enzymes; Potential drug targets	Nucleoplasm (reliability']); Additional: Cytosol;Nucleoli	Benzene Hexacarboxylic Acid; 3-phospho-D-glyceric acid		(M5891)HALLMARK HYPOXIA; (M5909)HALLMARK MYOGENESIS; (M5937)HALLMARK GLYCOLYSIS	0	1	0	1	0	0	1	0	0	0	1	0	0	0	0	0	1	0	0	0	1
5713	Psmd7	1	0	5713	Gene_ID	H. sapiens	5713	H. sapiens	PSMD7	proteasome 26S subunit, non-ATPase 7	GO:0006521 regulation of cellular amino acid metabolic process;GO:1902036 regulation of hematopoietic stem cell differentiation;GO:0002479 antigen processing and presentation of exogenous peptide antigen via MHC class I, TAP-dependent		Peptidases:Metallopeptidases; Predicted intracellular proteins; Enzymes	Nucleoplasm (reliability'])			(M5926)HALLMARK MYC TARGETS V1	1	0	0	0	0	0	0	0	0	0	0	0	0	0	0	1	0	0	0	0	1
81	Actn4	0	1	81	Gene_ID	H. sapiens	81	H. sapiens	ACTN4	actinin alpha 4	GO:0032417 positive regulation of sodium:proton antiporter activity;GO:1902396 protein localization to bicellular tight junction;GO:0032415 regulation of sodium:proton antiporter activity		Disease related genes; Predicted intracellular proteins	Actin filaments;Nuclear bodies (reliability']); Additional: Cytosol		(M186)PID PDGFRB PATHWAY	(M5893)HALLMARK MITOTIC SPINDLE; (M5915)HALLMARK APICAL JUNCTION	0	0	1	0	0	1	1	1	0	1	0	0	0	0	1	1	0	0	0	0	1
254552	Nudt8	0	1	254552	Gene_ID	H. sapiens	254552	H. sapiens	NUDT8	nudix hydrolase 8			Predicted intracellular proteins	Nucleoli (reliability']); Additional: Cytosol				0	0	0	0	0	0	0	0	0	0	0	0	0	0	0	0	0	0	0	0	1
92747	Bpifb1	1	0	92747	Gene_ID	H. sapiens	92747	H. sapiens	BPIFB1	BPI fold containing family B member 1	GO:0034144 negative regulation of toll-like receptor 4 signaling pathway;GO:0034143 regulation of toll-like receptor 4 signaling pathway;GO:0002227 innate immune response in mucosa		Predicted secreted proteins					0	0	0	0	0	0	0	0	0	0	0	0	0	0	1	0	0	0	0	0	1
5742	Ptgs1	1	0	5742	Gene_ID	H. sapiens	5742	H. sapiens	PTGS1	prostaglandin-endoperoxide synthase 1	GO:0019371 cyclooxygenase pathway;GO:0001516 prostaglandin biosynthetic process;GO:0046457 prostanoid biosynthetic process		ENZYME proteins:Oxidoreductases; Predicted intracellular proteins; FDA approved drug targets:Small molecule drugs; Cancer-related genes:Candidate cancer biomarkers; Enzymes	Golgi apparatus (reliability']); Additional: Vesicles	Dihomo-gamma-linolenic acid; Icosapent; Mesalazine; Acetaminophen; Indomethacin; Minoxidil; Nabumetone; Ketorolac; Tenoxicam; Tolmetin; Piroxicam; Fenoprofen; Diclofenac; Sulindac; Diethylcarbamazine; Flurbiprofen; Etodolac; Mefenamic acid; Naproxen; Sulfasalazine; Phenylbutazone; Meloxicam; Carprofen; Diflunisal; Suprofen; Salicylic acid; Meclofenamic acid; Acetylsalicylic acid; Bromfenac; Oxapr…			0	1	0	0	0	0	1	0	0	0	1	0	0	0	0	0	0	0	0	0	1
1571	Cyp2e1	1	0	1571	Gene_ID	H. sapiens	1571	H. sapiens	CYP2E1	cytochrome P450 family 2 subfamily E member 1	GO:0018885 carbon tetrachloride metabolic process;GO:0018910 benzene metabolic process;GO:0018960 4-nitrophenol metabolic process		ENZYME proteins:Oxidoreductases; Cancer-related genes:Candidate cancer biomarkers; Predicted intracellular proteins; Enzymes		Diacerein		(M5934)HALLMARK XENOBIOTIC METABOLISM	0	1	0	0	0	0	0	0	0	0	1	0	0	0	0	1	1	0	0	0	1
340485	Acer2	1	0	340485	Gene_ID	H. sapiens	340485	H. sapiens	ACER2	alkaline ceramidase 2	GO:0090285 negative regulation of protein glycosylation in Golgi;GO:0060051 negative regulation of protein glycosylation;GO:0090283 regulation of protein glycosylation in Golgi		ENZYME proteins:Hydrolases; Enzymes					0	0	1	1	0	0	0	0	0	0	1	0	0	0	1	0	0	0	0	0	1
54974	Thg1l	0	1	54974	Gene_ID	H. sapiens	54974	H. sapiens	THG1L	tRNA-histidine guanylyltransferase 1 like	GO:0099116 tRNA 5'-end processing;GO:0034471 ncRNA 5'-end processing;GO:0000966 RNA 5'-end processing		ENZYME proteins:Transferases; Predicted intracellular proteins; Enzymes					0	0	0	0	0	0	0	0	0	0	0	0	0	0	0	0	0	0	0	0	1
55930	Myo5c	1	0	55930	Gene_ID	H. sapiens	55930	H. sapiens	MYO5C	myosin VC	GO:0030050 vesicle transport along actin filament;GO:0099515 actin filament-based transport;GO:0099518 vesicle cytoskeletal trafficking		Predicted intracellular proteins	Cytosol (reliability']); Additional: Nucleoplasm				0	0	0	0	0	0	1	1	0	0	0	0	0	0	0	0	0	0	0	0	1
51762	Rab8b	0	1	51762	Gene_ID	H. sapiens	51762	H. sapiens	RAB8B	RAB8B, member RAS oncogene family	GO:0048210 Golgi vesicle fusion to target membrane;GO:0051461 positive regulation of corticotropin secretion;GO:0051459 regulation of corticotropin secretion		Predicted intracellular proteins	Vesicles (reliability']); Additional: Nucleoplasm	Phosphoaminophosphonic acid guanylate ester; Guanosine-5'-Diphosphate			0	0	0	0	0	0	0	0	1	0	0	0	0	0	0	0	0	0	0	0	1
4084	Mxd1	1	0	4084	Gene_ID	H. sapiens	4084	H. sapiens	MXD1	MAX dimerization protein 1	GO:0000122 negative regulation of transcription by RNA polymerase II;GO:0045892 negative regulation of transcription, DNA-templated;GO:1903507 negative regulation of nucleic acid-templated transcription		Transcription factors:Basic domains; Predicted intracellular proteins	Mitochondria;Nucleoplasm (reliability']); Additional: Cytosol		(M101)PID HDAC CLASSI PATHWAY; (M105)PID TELOMERASE PATHWAY	(M5947)HALLMARK IL2 STAT5 SIGNALING; (M5890)HALLMARK TNFA SIGNALING VIA NFKB; (M5932)HALLMARK INFLAMMATORY RESPONSE	0	0	0	0	0	0	0	0	0	0	0	0	0	0	0	0	0	0	0	0	1
151648	Sgol1	1	0	151648	Gene_ID	H. sapiens	151648	H. sapiens	SGO1	shugoshin 1	GO:0071962 mitotic sister chromatid cohesion, centromeric;GO:0045144 meiotic sister chromatid segregation;GO:0051177 meiotic sister chromatid cohesion		Disease related genes; Predicted intracellular proteins	Nucleoplasm (reliability']); Additional: Cytosol;Nuclear bodies		(M14)PID AURORA B PATHWAY; (M129)PID PLK1 PATHWAY		0	0	0	0	0	0	0	0	0	0	0	0	0	0	0	0	0	0	0	0	1
653509	Sftpa1	1	0	653509	Gene_ID	H. sapiens	653509	H. sapiens	SFTPA1	surfactant protein A1	GO:0008228 opsonization;GO:0007585 respiratory gaseous exchange;GO:0002224 toll-like receptor signaling pathway		Disease related genes; Predicted secreted proteins		2-(N-morpholino)ethanesulfonic acid	(M264)PID TOLL ENDOGENOUS PATHWAY; (M285)PID HNF3A PATHWAY; (M5880)NABA ECM AFFILIATED		0	0	0	0	0	0	0	0	0	0	0	0	0	0	0	0	0	0	0	0	1
29880	Alg5	0	1	29880	Gene_ID	H. sapiens	29880	H. sapiens	ALG5	ALG5 dolichyl-phosphate beta-glucosyltransferase	GO:0018279 protein N-linked glycosylation via asparagine;GO:0018196 peptidyl-asparagine modification;GO:0006487 protein N-linked glycosylation		ENZYME proteins:Transferases; Predicted intracellular proteins; Enzymes	Cytosol (reliability'])				0	0	0	1	0	0	0	0	0	0	0	0	0	0	0	0	0	0	0	0	1
90861	Hn1l	1	0	90861	Gene_ID	H. sapiens	90861	H. sapiens	JPT2	Jupiter microtubule associated homolog 2			Predicted intracellular proteins	Cytosol;Plasma membrane (reliability'])				0	0	0	0	0	0	0	0	0	0	0	0	0	0	0	0	0	0	0	0	1
439	Asna1	0	1	439	Gene_ID	H. sapiens	439	H. sapiens	GET3	guided entry of tail-anchored proteins factor 3, ATPase	GO:0015700 arsenite transport;GO:0071816 tail-anchored membrane protein insertion into ER membrane;GO:0045048 protein insertion into ER membrane		Predicted intracellular proteins; Transporters:Primary Active Transporters	Nucleoli (reliability']); Additional: Nucleoplasm	ATP			0	0	0	0	0	0	0	0	0	0	0	0	0	0	0	0	0	0	0	0	1
2953	Gstt2	1	0	2953	Gene_ID	H. sapiens	2953	H. sapiens	GSTT2	glutathione S-transferase theta 2 (gene/pseudogene)	GO:0006749 glutathione metabolic process;GO:0006575 cellular modified amino acid metabolic process;GO:0006790 sulfur compound metabolic process				S-Hexylglutathione		(M5934)HALLMARK XENOBIOTIC METABOLISM	0	0	0	1	0	0	0	0	0	0	0	0	0	0	0	0	0	0	0	0	1
2532	Ackr1	1	0	2532	Gene_ID	H. sapiens	2532	H. sapiens	ACKR1	atypical chemokine receptor 1 (Duffy blood group)	GO:0032642 regulation of chemokine production;GO:0070098 chemokine-mediated signaling pathway;GO:0032602 chemokine production		CD markers; G-protein coupled receptors:Chemokines and chemotactic factors receptors; G-protein coupled receptors:GPCRs excl olfactory receptors; Blood group antigen proteins				(M5945)HALLMARK HEME METABOLISM	0	0	0	0	0	0	0	0	0	0	0	1	0	0	0	0	0	0	0	0	1
134429	Stard4	1	0	134429	Gene_ID	H. sapiens	134429	H. sapiens	STARD4	StAR related lipid transfer domain containing 4	GO:0010879 cholesterol transport involved in cholesterol storage;GO:0010877 lipid transport involved in lipid storage;GO:0070859 positive regulation of bile acid biosynthetic process		Predicted intracellular proteins	Plasma membrane (reliability'])			(M5892)HALLMARK CHOLESTEROL HOMEOSTASIS; (M5924)HALLMARK MTORC1 SIGNALING	0	0	0	0	0	0	0	0	0	0	1	0	0	0	0	0	0	0	0	0	1
3397	Id1	0	1	3397	Gene_ID	H. sapiens	3397	H. sapiens	ID1	inhibitor of DNA binding 1, HLH protein	GO:0036164 cell-abiotic substrate adhesion;GO:0010621 negative regulation of transcription by transcription factor localization;GO:0060426 lung vasculature development		Transcription factors:Basic domains; Cancer-related genes:Candidate cancer biomarkers; Predicted intracellular proteins	Nucleoplasm (reliability'])		(M182)PID IL3 PATHWAY; (M185)PID ALK1 PATHWAY; (M288)PID HES HEY PATHWAY	(M5896)HALLMARK TGF BETA SIGNALING; (M5942)HALLMARK UV RESPONSE DN	0	0	0	0	1	0	0	1	1	1	0	0	0	1	0	0	0	0	0	0	1
26353	Hspb8	0	1	26353	Gene_ID	H. sapiens	26353	H. sapiens	HSPB8	heat shock protein family B (small) member 8	GO:1905335 regulation of aggrephagy;GO:1905337 positive regulation of aggrephagy;GO:0035973 aggrephagy		Disease related genes; Predicted intracellular proteins	Cytosol (reliability']); Additional: Nuclear bodies;Nucleoplasm			(M5905)HALLMARK ADIPOGENESIS; (M5906)HALLMARK ESTROGEN RESPONSE EARLY; (M5907)HALLMARK ESTROGEN RESPONSE LATE	0	0	0	0	0	0	0	0	0	0	0	0	0	0	0	0	0	0	0	0	1
11213	Irak3	1	0	11213	Gene_ID	H. sapiens	11213	H. sapiens	IRAK3	interleukin 1 receptor associated kinase 3	GO:0010931 macrophage tolerance induction;GO:0010932 regulation of macrophage tolerance induction;GO:0010933 positive regulation of macrophage tolerance induction	TKL Ser/Thr protein kinase family	Predicted intracellular proteins; Disease related genes; Enzymes; Kinases:TKL Ser/Thr protein kinases; Potential drug targets; ENZYME proteins:Transferases	Vesicles (reliability'])	Fostamatinib	(M110)PID IL1 PATHWAY		0	0	0	0	0	0	0	0	0	0	0	0	0	0	1	1	0	0	0	0	1
362	Aqp5	1	0	362	Gene_ID	H. sapiens	362	H. sapiens	AQP5	aquaporin 5	GO:0015670 carbon dioxide transport;GO:0071476 cellular hypotonic response;GO:0006971 hypotonic response		Potential drug targets; Disease related genes; Transporters:Transporter channels and pores	Plasma membrane (reliability'])		(M232)PID ECADHERIN STABILIZATION PATHWAY		0	0	0	0	0	0	0	0	0	0	0	0	0	0	0	0	0	0	0	1	1
2328	Fmo3	1	0	2328	Gene_ID	H. sapiens	2328	H. sapiens	FMO3	flavin containing dimethylaniline monoxygenase 3	GO:0006805 xenobiotic metabolic process;GO:0071466 cellular response to xenobiotic stimulus;GO:0009410 response to xenobiotic stimulus		ENZYME proteins:Oxidoreductases; Predicted intracellular proteins; Disease related genes; Enzymes; Potential drug targets				(M5934)HALLMARK XENOBIOTIC METABOLISM	0	0	0	0	0	0	0	0	0	0	0	0	0	0	0	0	0	0	0	0	1
5037	Pebp1	0	1	5037	Gene_ID	H. sapiens	5037	H. sapiens	PEBP1	phosphatidylethanolamine binding protein 1	GO:0043409 negative regulation of MAPK cascade;GO:0010951 negative regulation of endopeptidase activity;GO:0010466 negative regulation of peptidase activity		Predicted intracellular proteins	Plasma membrane (reliability'])	Copper	(M14)PID AURORA B PATHWAY; (M164)PID ERBB1 DOWNSTREAM PATHWAY	(M5951)HALLMARK SPERMATOGENESIS	0	0	0	0	0	0	0	0	0	0	0	0	0	0	0	0	0	0	0	0	1
72	Actg2	1	0	72	Gene_ID	H. sapiens	72	H. sapiens	ACTG2	actin gamma 2, smooth muscle	GO:0090131 mesenchyme migration;GO:0072132 mesenchyme morphogenesis;GO:0060485 mesenchyme development		Disease related genes; Predicted intracellular proteins			(M16801)SIG REGULATION OF THE ACTIN CYTOSKELETON BY RHO GTPASES	(M5915)HALLMARK APICAL JUNCTION	0	0	0	0	0	0	1	0	0	0	0	0	0	0	0	0	0	0	0	0	1
51593	Srrt	0	1	51593	Gene_ID	H. sapiens	51593	H. sapiens	SRRT	serrate, RNA effector molecule	GO:0031053 primary miRNA processing;GO:0097150 neuronal stem cell population maintenance;GO:0046685 response to arsenic-containing substance		Predicted intracellular proteins	Nucleoplasm (reliability'])				0	0	0	0	0	0	0	0	0	0	0	0	0	0	0	0	0	0	0	0	1
1051	Cebpb	1	0	1051	Gene_ID	H. sapiens	1051	H. sapiens	CEBPB	CCAAT enhancer binding protein beta	GO:2000120 positive regulation of sodium-dependent phosphate transport;GO:1901329 regulation of odontoblast differentiation;GO:2000118 regulation of sodium-dependent phosphate transport		Transcription factors:Basic domains; Predicted intracellular proteins	Nucleoplasm (reliability'])	Quercetin	(M182)PID IL3 PATHWAY; (M229)PID P38 ALPHA BETA DOWNSTREAM PATHWAY; (M161)PID IFNG PATHWAY	(M5922)HALLMARK UNFOLDED PROTEIN RESPONSE; (M5890)HALLMARK TNFA SIGNALING VIA NFKB; (M5921)HALLMARK COMPLEMENT	0	0	1	0	0	0	0	0	1	1	0	1	0	0	1	1	0	0	0	0	1
638	Bik	1	0	638	Gene_ID	H. sapiens	638	H. sapiens	BIK	BCL2 interacting killer	GO:0090200 positive regulation of release of cytochrome c from mitochondria;GO:0090199 regulation of release of cytochrome c from mitochondria;GO:0001836 release of cytochrome c from mitochondria						(M5902)HALLMARK APOPTOSIS; (M5937)HALLMARK GLYCOLYSIS	0	0	0	0	0	0	0	0	0	0	0	0	0	0	0	0	0	0	0	0	1
514	Atp5e	0	1	514	Gene_ID	H. sapiens	514	H. sapiens	ATP5F1E	ATP synthase F1 subunit epsilon	GO:0042776 mitochondrial ATP synthesis coupled proton transport;GO:0015985 energy coupled proton transport, down electrochemical gradient;GO:0015986 ATP synthesis coupled proton transport		Disease related genes; Predicted intracellular proteins				(M5936)HALLMARK OXIDATIVE PHOSPHORYLATION	0	1	0	1	0	0	0	0	0	0	0	0	0	0	0	0	0	0	0	0	1
4023	Lpl	0	1	4023	Gene_ID	H. sapiens	4023	H. sapiens	LPL	lipoprotein lipase	GO:0055095 lipoprotein particle mediated signaling;GO:0055096 low-density lipoprotein particle mediated signaling;GO:0010886 positive regulation of cholesterol storage		Predicted intracellular proteins; FDA approved drug targets:Small molecule drugs; Disease related genes; ENZYME proteins:Hydrolases; Predicted secreted proteins; Enzymes; Candidate cardiovascular disease genes	Vesicles (reliability'])	Tyloxapol; Omega-3-carboxylic acids; Glycyrrhizic acid		(M5944)HALLMARK ANGIOGENESIS; (M5892)HALLMARK CHOLESTEROL HOMEOSTASIS; (M5905)HALLMARK ADIPOGENESIS	0	1	0	0	0	0	0	0	1	1	1	1	1	0	0	0	0	0	0	0	1
70	Actc1	1	0	70	Gene_ID	H. sapiens	70	H. sapiens	ACTC1	actin alpha cardiac muscle 1	GO:0090131 mesenchyme migration;GO:0030240 skeletal muscle thin filament assembly;GO:0014866 skeletal myofibril assembly		Disease related genes; Predicted intracellular proteins				(M5909)HALLMARK MYOGENESIS; (M5915)HALLMARK APICAL JUNCTION; (M5956)HALLMARK KRAS SIGNALING DN	0	0	0	0	0	0	1	1	0	0	0	0	0	0	0	0	0	1	0	0	1
53354	Pank1	0	1	53354	Gene_ID	H. sapiens	53354	H. sapiens	PANK1	pantothenate kinase 1	GO:0015937 coenzyme A biosynthetic process;GO:0015936 coenzyme A metabolic process;GO:0033866 nucleoside bisphosphate biosynthetic process		ENZYME proteins:Transferases; Predicted intracellular proteins; Enzymes					0	0	0	1	0	0	0	0	0	0	0	0	0	0	0	0	0	0	0	0	1
80318	Gkap1	1	0	80318	Gene_ID	H. sapiens	80318	H. sapiens	GKAP1	G kinase anchoring protein 1	GO:0046628 positive regulation of insulin receptor signaling pathway;GO:1900078 positive regulation of cellular response to insulin stimulus;GO:0046626 regulation of insulin receptor signaling pathway		Predicted intracellular proteins	Centriolar satellite;Cytosol (reliability'])				0	0	0	0	0	0	0	0	1	0	0	0	0	0	0	0	0	0	0	0	1
9227	Lrat	1	0	9227	Gene_ID	H. sapiens	9227	H. sapiens	LRAT	lecithin retinol acyltransferase	GO:0006776 vitamin A metabolic process;GO:0033189 response to vitamin A;GO:0006775 fat-soluble vitamin metabolic process		Predicted intracellular proteins; Disease related genes; Enzymes; Potential drug targets; ENZYME proteins:Transferases	Golgi apparatus (reliability']); Additional: Endoplasmic reticulum	Vitamin A	(M117)PID CONE PATHWAY; (M204)PID RHODOPSIN PATHWAY		0	0	0	0	0	0	0	0	0	0	0	0	0	0	0	1	0	0	0	0	1
25937	Wwtr1	1	0	25937	Gene_ID	H. sapiens	25937	H. sapiens	WWTR1	WW domain containing transcription regulator 1	GO:0072257 metanephric nephron tubule epithelial cell differentiation;GO:0072307 regulation of metanephric nephron tubule epithelial cell differentiation;GO:0072182 regulation of nephron tubule epithelial cell differentiation		Predicted intracellular proteins; Cancer-related genes	Nuclear bodies;Nucleoplasm (reliability']); Additional: Cytosol			(M5896)HALLMARK TGF BETA SIGNALING; (M5909)HALLMARK MYOGENESIS	0	0	0	0	0	0	1	0	0	0	0	0	0	1	0	0	0	0	0	0	1
389125	Mustn1	1	0	389125	Gene_ID	H. sapiens	389125	H. sapiens	MUSTN1	musculoskeletal, embryonic nuclear protein 1	GO:0035988 chondrocyte proliferation;GO:0042246 tissue regeneration;GO:0002062 chondrocyte differentiation		Predicted intracellular proteins					0	0	0	0	0	0	0	0	0	0	0	0	0	0	0	0	0	0	0	1	1
7840	Alms1	0	1	7840	Gene_ID	H. sapiens	7840	H. sapiens	ALMS1	ALMS1 centrosome and basal body associated protein	GO:0046599 regulation of centriole replication;GO:0007099 centriole replication;GO:0098534 centriole assembly		Predicted intracellular proteins	Centrosome;Cytosol (reliability']); Additional: Nucleoplasm			(M5893)HALLMARK MITOTIC SPINDLE	0	0	0	0	0	0	0	1	0	0	0	0	0	0	0	0	0	1	0	0	1
781	Cacna2d1	1	0	781	Gene_ID	H. sapiens	781	H. sapiens	CACNA2D1	calcium voltage-gated channel auxiliary subunit alpha2delta 1	GO:0086048 membrane depolarization during bundle of His cell action potential;GO:1901843 positive regulation of high voltage-gated calcium channel activity;GO:0086028 bundle of His cell to Purkinje myocyte signaling		FDA approved drug targets:Small molecule drugs; Transporters:Accessory Factors Involved in Transport; Predicted intracellular proteins		Pregabalin; Isradipine; Ibutilide; Nisoldipine; Nicardipine; Gabapentin; Felodipine; Nitrendipine; Cyclandelate; Nilvadipine; Gabapentin enacarbil			0	0	0	0	0	0	1	0	1	0	0	0	0	0	0	0	0	0	0	0	1
9886	Rhobtb1	0	1	9886	Gene_ID	H. sapiens	9886	H. sapiens	RHOBTB1	Rho related BTB domain containing 1	GO:0043652 engulfment of apoptotic cell;GO:0043277 apoptotic cell clearance;GO:0030865 cortical cytoskeleton organization		Predicted intracellular proteins	Nucleoplasm (reliability']); Additional: Cytosol				0	0	0	0	0	0	0	1	0	0	0	0	0	0	0	0	0	0	0	0	1
64963	Mrps11	0	1	64963	Gene_ID	H. sapiens	64963	H. sapiens	MRPS11	mitochondrial ribosomal protein S11	GO:0000028 ribosomal small subunit assembly;GO:0042769 DNA damage response, detection of DNA damage;GO:0000462 maturation of SSU-rRNA from tricistronic rRNA transcript (SSU-rRNA, 5.8S rRNA, LSU-rRNA)		Ribosomal proteins; Predicted intracellular proteins	Mitochondria (reliability'])			(M5936)HALLMARK OXIDATIVE PHOSPHORYLATION	0	0	0	0	0	0	0	0	0	0	0	0	0	0	0	0	0	0	0	0	1
55243	Kirrel	0	1	55243	Gene_ID	H. sapiens	55243	H. sapiens	KIRREL1	kirre like nephrin family adhesion molecule 1	GO:0007588 excretion;GO:0030838 positive regulation of actin filament polymerization;GO:0032273 positive regulation of protein polymerization					(M193)PID NEPHRIN NEPH1 PATHWAY		0	0	0	0	0	0	0	1	0	0	0	0	0	0	0	0	0	0	0	0	1
84869	Cbr4	0	1	84869	Gene_ID	H. sapiens	84869	H. sapiens	CBR4	carbonyl reductase 4	GO:0030638 polyketide metabolic process;GO:0044597 daunorubicin metabolic process;GO:0044598 doxorubicin metabolic process		Predicted intracellular proteins				(M5953)HALLMARK KRAS SIGNALING UP	0	0	0	1	0	0	0	0	0	0	1	0	0	0	0	0	0	0	0	0	1
7037	Tfrc	1	0	7037	Gene_ID	H. sapiens	7037	H. sapiens	TFRC	transferrin receptor	GO:0010637 negative regulation of mitochondrial fusion;GO:0010635 regulation of mitochondrial fusion;GO:0045780 positive regulation of bone resorption		CD markers; Predicted intracellular proteins; Disease related genes; Transporters; Cancer-related genes:Candidate cancer biomarkers; Predicted secreted proteins; Enzymes; Potential drug targets; Peptidases:Metallopeptidases	Endosomes;Lysosomes (reliability'])	Iron; Ferrous sulfate anhydrous; Ferric cation; Ferrous gluconate; Ferrous succinate; Ferrous ascorbate; Ferrous fumarate; Ferrous glycine sulfate; Tetraferric tricitrate decahydrate; Ferric derisomaltose	(M106)PID HNF3B PATHWAY; (M255)PID HIF1 TFPATHWAY; (M66)PID MYC ACTIV PATHWAY	(M5941)HALLMARK UV RESPONSE UP; (M5924)HALLMARK MTORC1 SIGNALING; (M5925)HALLMARK E2F TARGETS	1	0	1	0	0	0	0	0	0	0	0	0	0	0	0	0	0	0	0	0	1
25909	Ahctf1	0	1	25909	Gene_ID	H. sapiens	25909	H. sapiens	AHCTF1	AT-hook containing transcription factor 1	GO:0051292 nuclear pore complex assembly;GO:0006999 nuclear pore organization;GO:0046931 pore complex assembly		Predicted intracellular proteins; Transporters:Transporter channels and pores	Nuclear membrane (reliability'])				0	0	0	0	0	0	0	0	0	0	0	0	0	0	0	0	0	0	0	0	1
79624	Armt1	1	0	79624	Gene_ID	H. sapiens	79624	H. sapiens	ARMT1	acidic residue methyltransferase 1	GO:0006479 protein methylation;GO:0008213 protein alkylation;GO:2001020 regulation of response to DNA damage stimulus		Predicted intracellular proteins	Cytosol;Nuclear bodies;Nucleoplasm (reliability'])				0	0	0	0	0	0	0	0	0	0	0	0	0	0	0	0	0	0	0	0	1
5789	Ptprd	1	0	5789	Gene_ID	H. sapiens	5789	H. sapiens	PTPRD	protein tyrosine phosphatase receptor type D	GO:0007185 transmembrane receptor protein tyrosine phosphatase signaling pathway;GO:0099545 trans-synaptic signaling by trans-synaptic complex;GO:0097105 presynaptic membrane assembly		ENZYME proteins:Hydrolases; Predicted intracellular proteins; Enzymes	Vesicles (reliability']); Additional: Nucleoplasm			(M5941)HALLMARK UV RESPONSE UP	0	0	0	0	0	0	0	0	0	0	0	0	0	0	0	0	0	0	0	0	1
9074	Cldn6	0	1	9074	Gene_ID	H. sapiens	9074	H. sapiens	CLDN6	claudin 6	GO:0016338 calcium-independent cell-cell adhesion via plasma membrane cell-adhesion molecules;GO:0070830 bicellular tight junction assembly;GO:0120192 tight junction assembly		Predicted intracellular proteins				(M5915)HALLMARK APICAL JUNCTION	0	0	0	0	0	0	0	0	0	0	0	0	0	0	0	0	0	0	0	0	1
10324	Klhl41	1	0	10324	Gene_ID	H. sapiens	10324	H. sapiens	KLHL41	kelch like family member 41	GO:0031271 lateral pseudopodium assembly;GO:0031275 regulation of lateral pseudopodium assembly;GO:0031272 regulation of pseudopodium assembly		Disease related genes; Predicted intracellular proteins	Cytosol (reliability']); Additional: Nucleoplasm;Plasma membrane				0	0	0	0	0	0	1	1	0	0	0	0	0	0	0	0	0	1	0	0	1
7852	Cxcr4	1	0	7852	Gene_ID	H. sapiens	7852	H. sapiens	CXCR4	C-X-C motif chemokine receptor 4	GO:0038159 C-X-C chemokine receptor CXCR4 signaling pathway;GO:0038160 CXCL12-activated CXCR4 signaling pathway;GO:2000448 positive regulation of macrophage migration inhibitory factor signaling pathway		CD markers; G-protein coupled receptors:GPCRs excl olfactory receptors; FDA approved drug targets:Small molecule drugs; Disease related genes; Transporters; Cancer-related genes:Candidate cancer biomarkers; G-protein coupled receptors:Chemokines and chemotactic factors receptors		Framycetin; AMD-070; Plerixafor; Ibalizumab	(M55)PID S1P S1P3 PATHWAY; (M257)PID EPHRINB REV PATHWAY; (M165)PID SYNDECAN 4 PATHWAY	(M5923)HALLMARK PI3K AKT MTOR SIGNALING; (M5891)HALLMARK HYPOXIA; (M5924)HALLMARK MTORC1 SIGNALING	0	0	1	0	1	1	1	0	0	0	0	1	0	0	0	0	0	0	0	1	1
64093	Smoc1	1	0	64093	Gene_ID	H. sapiens	64093	H. sapiens	SMOC1	SPARC related modular calcium binding 1	GO:0045667 regulation of osteoblast differentiation;GO:0048736 appendage development;GO:0060173 limb development		Disease related genes; Predicted secreted proteins	Plasma membrane (reliability'])		(M3008)NABA ECM GLYCOPROTEINS; (M5884)NABA CORE MATRISOME; (M5889)NABA MATRISOME		0	0	0	0	0	0	0	0	0	0	0	0	1	0	0	0	0	0	0	0	1
23031	Mast3	0	1	23031	Gene_ID	H. sapiens	23031	H. sapiens	MAST3	microtubule associated serine/threonine kinase 3	GO:0018105 peptidyl-serine phosphorylation;GO:0018209 peptidyl-serine modification;GO:0018193 peptidyl-amino acid modification	AGC Ser/Thr protein kinase family	Kinases:AGC Ser/Thr protein kinases; ENZYME proteins:Transferases; Predicted intracellular proteins; Enzymes	Nuclear speckles (reliability'])			(M5956)HALLMARK KRAS SIGNALING DN	0	0	0	0	0	0	0	0	0	0	0	0	0	0	0	0	0	0	0	0	1
6427	Srsf2	1	0	6427	Gene_ID	H. sapiens	6427	H. sapiens	SRSF2	serine and arginine rich splicing factor 2	GO:0033197 response to vitamin E;GO:0045292 mRNA cis splicing, via spliceosome;GO:0000381 regulation of alternative mRNA splicing, via spliceosome		Predicted intracellular proteins; Cancer-related genes:Mutated cancer genes	Nucleoplasm (reliability']); Additional: Cytosol			(M5901)HALLMARK G2M CHECKPOINT; (M5925)HALLMARK E2F TARGETS; (M5926)HALLMARK MYC TARGETS V1	0	0	0	0	0	0	0	0	0	0	0	0	0	0	0	0	0	0	0	0	1
64393	Zmat3	0	1	64393	Gene_ID	H. sapiens	64393	H. sapiens	ZMAT3	zinc finger matrin-type 3	GO:0043065 positive regulation of apoptotic process;GO:0040008 regulation of growth;GO:0043068 positive regulation of programmed cell death		Predicted intracellular proteins	Nucleoplasm (reliability'])			(M5939)HALLMARK P53 PATHWAY	0	0	0	0	0	0	0	0	0	0	0	0	0	0	0	0	0	0	0	0	1
9782	Matr3	1	0	9782	Gene_ID	H. sapiens	9782	H. sapiens	MATR3	matrin 3	GO:0003170 heart valve development;GO:0003281 ventricular septum development;GO:0003279 cardiac septum development		Disease related genes; Predicted intracellular proteins	Nucleoplasm (reliability'])				0	0	0	0	0	0	0	0	0	0	0	0	0	0	0	0	0	0	0	0	1
9578	Cdc42bpb	0	1	9578	Gene_ID	H. sapiens	9578	H. sapiens	CDC42BPB	CDC42 binding protein kinase beta	GO:0031532 actin cytoskeleton reorganization;GO:0018107 peptidyl-threonine phosphorylation;GO:0018210 peptidyl-threonine modification	AGC Ser/Thr protein kinase family	Kinases:AGC Ser/Thr protein kinases; ENZYME proteins:Transferases; Predicted intracellular proteins; Enzymes					0	0	0	0	0	0	0	1	0	0	0	0	0	0	0	0	0	1	0	0	1
26580	Bscl2	0	1	26580	Gene_ID	H. sapiens	26580	H. sapiens	BSCL2	BSCL2 lipid droplet biogenesis associated, seipin	GO:0140042 lipid droplet formation;GO:0050995 negative regulation of lipid catabolic process;GO:0034389 lipid droplet organization		Disease related genes; Predicted intracellular proteins					0	0	0	0	0	0	0	0	0	0	0	0	0	0	0	0	0	0	0	0	1
53373	Tpcn1	0	1	53373	Gene_ID	H. sapiens	53373	H. sapiens	TPCN1	two pore segment channel 1	GO:0051209 release of sequestered calcium ion into cytosol;GO:0051283 negative regulation of sequestering of calcium ion;GO:0051282 regulation of sequestering of calcium ion		Voltage-gated ion channels:CatSper and Two-Pore Channels; Predicted intracellular proteins; Transporters:Transporter channels and pores					0	0	0	0	0	0	0	0	0	0	0	0	0	0	0	0	0	0	0	0	1
8405	Spop	0	1	8405	Gene_ID	H. sapiens	8405	H. sapiens	SPOP	speckle type BTB/POZ protein	GO:0000209 protein polyubiquitination;GO:0043161 proteasome-mediated ubiquitin-dependent protein catabolic process;GO:0010498 proteasomal protein catabolic process		Cancer-related genes:Mutational cancer driver genes; Predicted intracellular proteins; Cancer-related genes:Mutated cancer genes			(M219)PID HEDGEHOG GLI PATHWAY	(M5942)HALLMARK UV RESPONSE DN	0	0	0	0	0	0	0	0	0	0	0	0	0	0	0	0	0	0	0	0	1
6123	Rpl3l	1	0	6123	Gene_ID	H. sapiens	6123	H. sapiens	RPL3L	ribosomal protein L3 like	GO:0000027 ribosomal large subunit assembly;GO:0042255 ribosome assembly;GO:0042273 ribosomal large subunit biogenesis		Ribosomal proteins; Predicted intracellular proteins	Nuclear speckles (reliability'])			(M5950)HALLMARK ALLOGRAFT REJECTION	0	0	0	0	0	0	0	0	0	0	0	0	0	0	0	0	0	0	0	0	1
23135	Kdm6b	0	1	23135	Gene_ID	H. sapiens	23135	H. sapiens	KDM6B	lysine demethylase 6B	GO:0071557 histone H3-K27 demethylation;GO:0060992 response to fungicide;GO:0070076 histone lysine demethylation		Predicted intracellular proteins	Nuclear speckles (reliability'])			(M5890)HALLMARK TNFA SIGNALING VIA NFKB	0	0	0	0	0	0	0	0	0	0	0	0	0	0	0	0	1	1	0	0	1
8295	Trrap	0	1	8295	Gene_ID	H. sapiens	8295	H. sapiens	TRRAP	transformation/transcription domain associated protein	GO:0043968 histone H2A acetylation;GO:0016578 histone deubiquitination;GO:1904837 beta-catenin-TCF complex assembly		Predicted intracellular proteins; Disease related genes; Cancer-related genes	Nucleoplasm (reliability']); Additional: Golgi apparatus		(M139)PID MYC PATHWAY; (M40)PID E2F PATHWAY; (M66)PID MYC ACTIV PATHWAY		0	0	0	0	0	0	0	0	0	0	0	0	0	0	0	0	0	0	0	0	1
4283	Cxcl9	0	1	4283	Gene_ID	H. sapiens	4283	H. sapiens	CXCL9	C-X-C motif chemokine ligand 9	GO:1901741 positive regulation of myoblast fusion;GO:1901739 regulation of myoblast fusion;GO:0045663 positive regulation of myoblast differentiation		Cancer-related genes:Candidate cancer biomarkers; Predicted secreted proteins			(M196)PID IL23 PATHWAY; (M222)PID CXCR3 PATHWAY; (M5883)NABA SECRETED FACTORS	(M5897)HALLMARK IL6 JAK STAT3 SIGNALING; (M5913)HALLMARK INTERFERON GAMMA RESPONSE; (M5932)HALLMARK INFLAMMATORY RESPONSE	0	0	0	0	0	0	0	0	0	1	0	1	0	0	0	1	0	1	0	0	1
84445	Lzts2	1	0	84445	Gene_ID	H. sapiens	84445	H. sapiens	LZTS2	leucine zipper tumor suppressor 2	GO:0060682 primary ureteric bud growth;GO:0072197 ureter morphogenesis;GO:0060677 ureteric bud elongation		Predicted intracellular proteins	Cytosol;Plasma membrane (reliability'])				0	0	0	0	0	0	0	0	0	0	0	0	0	0	0	0	0	0	0	0	1
4143	Mat1a	1	0	4143	Gene_ID	H. sapiens	4143	H. sapiens	MAT1A	methionine adenosyltransferase 1A	GO:0009087 methionine catabolic process;GO:0006556 S-adenosylmethionine biosynthetic process;GO:0001887 selenium compound metabolic process		Predicted intracellular proteins; Disease related genes; Enzymes; Potential drug targets; ENZYME proteins:Transferases		Ademetionine; 3-Oxiran-2ylalanine; L-2-amino-4-methoxy-cis-but-3-enoic acid			0	0	0	1	0	0	0	0	0	0	0	0	0	0	0	0	0	0	0	0	1
23516	Slc39a14	0	1	23516	Gene_ID	H. sapiens	23516	H. sapiens	SLC39A14	solute carrier family 39 member 14	GO:0055071 manganese ion homeostasis;GO:0033212 iron assimilation;GO:0015691 cadmium ion transport		Disease related genes; Predicted intracellular proteins	Endoplasmic reticulum;Golgi apparatus;Plasma membrane (reliability'])				0	0	0	0	0	0	0	0	1	0	0	0	0	0	0	0	0	0	0	0	1
23518	R3hdm1	0	1	23518	Gene_ID	H. sapiens	23518	H. sapiens	R3HDM1	R3H domain containing 1			Predicted intracellular proteins	Cytosol;Nucleoplasm (reliability'])				0	0	0	0	0	0	0	0	0	0	0	0	0	0	0	0	0	0	0	0	1
23315	Slc9a8	0	1	23315	Gene_ID	H. sapiens	23315	H. sapiens	SLC9A8	solute carrier family 9 member A8	GO:0051453 regulation of intracellular pH;GO:0030641 regulation of cellular pH;GO:0006885 regulation of pH		Transporters:Electrochemical Potential-driven transporters					0	0	0	0	0	0	0	0	0	0	0	0	0	0	0	0	0	0	0	0	1
7249	Tsc2	0	1	7249	Gene_ID	H. sapiens	7249	H. sapiens	TSC2	TSC complex subunit 2	GO:1901525 negative regulation of mitophagy;GO:1903147 negative regulation of autophagy of mitochondrion;GO:0014067 negative regulation of phosphatidylinositol 3-kinase signaling		Disease related genes; Cancer-related genes:Mutational cancer driver genes; Predicted intracellular proteins	Cytosol (reliability'])		(M199)PID P38 MK2 PATHWAY; (M87)PID LKB1 PATHWAY; (M254)PID MYC REPRESS PATHWAY	(M5923)HALLMARK PI3K AKT MTOR SIGNALING; (M5909)HALLMARK MYOGENESIS	0	1	0	0	0	0	0	0	1	0	0	1	0	0	0	0	0	0	0	0	1
388796	Snhg17	0	1	388796	Gene_ID	H. sapiens	388796	H. sapiens	SNHG17	small nucleolar RNA host gene 17								0	0	0	0	0	0	0	0	0	0	0	0	0	0	0	0	0	0	0	0	1
80273	Grpel1	0	1	80273	Gene_ID	H. sapiens	80273	H. sapiens	GRPEL1	GrpE like 1, mitochondrial	GO:0030150 protein import into mitochondrial matrix;GO:0044743 protein transmembrane import into intracellular organelle;GO:0065002 intracellular protein transmembrane transport		Predicted intracellular proteins	Mitochondria (reliability'])			(M5941)HALLMARK UV RESPONSE UP; (M5905)HALLMARK ADIPOGENESIS; (M5936)HALLMARK OXIDATIVE PHOSPHORYLATION	0	1	0	0	0	0	0	0	0	0	0	0	0	0	0	0	0	0	0	0	1
4792	Nfkbia	1	0	4792	Gene_ID	H. sapiens	4792	H. sapiens	NFKBIA	NFKB inhibitor alpha	GO:0070427 nucleotide-binding oligomerization domain containing 1 signaling pathway;GO:0007253 cytoplasmic sequestering of NF-kappaB;GO:0070417 cellular response to cold		Predicted intracellular proteins; Cancer-related genes:Candidate cancer biomarkers; Disease related genes; Transcription factors:Immunoglobulin fold	Cytosol (reliability'])	Acetylsalicylic acid; Bardoxolone methyl; Astaxanthin	(M26)PID NFKAPPAB ATYPICAL PATHWAY; (M37)PID NFKAPPAB CANONICAL PATHWAY; (M45)PID CD40 PATHWAY	(M5941)HALLMARK UV RESPONSE UP; (M5890)HALLMARK TNFA SIGNALING VIA NFKB; (M5913)HALLMARK INTERFERON GAMMA RESPONSE	0	0	0	0	0	0	0	0	1	1	0	1	0	0	1	1	0	0	0	0	1
4712	Ndufb6	0	1	4712	Gene_ID	H. sapiens	4712	H. sapiens	NDUFB6	NADH:ubiquinone oxidoreductase subunit B6	GO:0006120 mitochondrial electron transport, NADH to ubiquinone;GO:0010257 NADH dehydrogenase complex assembly;GO:0032981 mitochondrial respiratory chain complex I assembly		Predicted intracellular proteins	Mitochondria (reliability'])	NADH		(M5936)HALLMARK OXIDATIVE PHOSPHORYLATION	0	1	0	1	0	0	0	0	0	0	0	0	0	0	0	0	0	0	0	0	1
3727	Jund	1	0	3727	Gene_ID	H. sapiens	3727	H. sapiens	JUND	JunD proto-oncogene, AP-1 transcription factor subunit	GO:0002076 osteoblast development;GO:0045669 positive regulation of osteoblast differentiation;GO:0071277 cellular response to calcium ion		Transcription factors:Basic domains; Cancer-related genes:Candidate cancer biomarkers; Predicted intracellular proteins	Nucleoplasm (reliability'])		(M65)PID FRA PATHWAY; (M166)PID ATF2 PATHWAY; (M167)PID AP1 PATHWAY		0	0	0	0	0	0	0	0	1	0	0	0	0	0	0	0	1	0	0	0	1
6342	Scp2	0	1	6342	Gene_ID	H. sapiens	6342	H. sapiens	SCP2	sterol carrier protein 2	GO:1901373 lipid hydroperoxide transport;GO:0032379 positive regulation of intracellular lipid transport;GO:0032382 positive regulation of intracellular sterol transport		Predicted intracellular proteins; Disease related genes; Enzymes; Potential drug targets; ENZYME proteins:Transferases	Peroxisomes (reliability'])			(M5949)HALLMARK PEROXISOME; (M5948)HALLMARK BILE ACID METABOLISM; (M5905)HALLMARK ADIPOGENESIS	0	0	0	0	0	0	0	0	0	0	1	0	0	0	0	0	0	0	0	0	1
65108	Marcksl1	1	0	65108	Gene_ID	H. sapiens	65108	H. sapiens	MARCKSL1	MARCKS like 1	GO:0007015 actin filament organization;GO:0030036 actin cytoskeleton organization;GO:0097435 supramolecular fiber organization		Predicted intracellular proteins	Cytosol (reliability']); Additional: Actin filaments;Nucleoplasm				0	0	0	0	0	0	0	1	0	0	0	0	0	0	0	0	0	0	0	0	1
9575	Clock	1	0	9575	Gene_ID	H. sapiens	9575	H. sapiens	CLOCK	clock circadian regulator	GO:2000323 negative regulation of glucocorticoid receptor signaling pathway;GO:2000074 regulation of type B pancreatic cell development;GO:2000322 regulation of glucocorticoid receptor signaling pathway		Transcription factors:Basic domains; ENZYME proteins:Transferases; Predicted intracellular proteins; Enzymes	Nucleoplasm (reliability']); Additional: Vesicles		(M95)PID CIRCADIAN PATHWAY		0	0	0	0	0	0	0	0	1	1	1	1	0	0	0	0	0	0	1	0	1
8329	Hist1h2ai	1	0	8329	Gene_ID	H. sapiens	8329	H. sapiens	H2AC13	H2A clustered histone 13	GO:0006342 chromatin silencing;GO:0045814 negative regulation of gene expression, epigenetic;GO:0006325 chromatin organization		Predicted intracellular proteins					0	0	0	0	0	0	0	0	0	0	0	0	0	0	0	0	0	0	0	0	1
10233	Lrrc23	1	0	10233	Gene_ID	H. sapiens	10233	H. sapiens	LRRC23	leucine rich repeat containing 23	GO:0008150 biological_process		Predicted intracellular proteins	Nucleoli (reliability'])				0	0	0	0	0	0	0	0	0	0	0	0	0	0	0	0	0	0	0	0	1
334	Aplp2	0	1	334	Gene_ID	H. sapiens	334	H. sapiens	APLP2	amyloid beta precursor like protein 2	GO:0002576 platelet degranulation;GO:0010951 negative regulation of endopeptidase activity;GO:0010466 negative regulation of peptidase activity		Predicted intracellular proteins	Vesicles (reliability'])	Zinc; Zinc acetate; Zinc chloride; Zinc sulfate, unspecified form		(M5905)HALLMARK ADIPOGENESIS	0	0	0	0	0	0	0	0	0	0	0	0	0	0	0	0	0	0	0	0	1
51011	Fahd2a	0	1	51011	Gene_ID	H. sapiens	51011	H. sapiens	FAHD2A	fumarylacetoacetate hydrolase domain containing 2A			Predicted intracellular proteins					0	0	0	0	0	0	0	0	0	0	0	0	0	0	0	0	0	0	0	0	1
1512	Ctsh	0	1	1512	Gene_ID	H. sapiens	1512	H. sapiens	CTSH	cathepsin H	GO:0010813 neuropeptide catabolic process;GO:0060448 dichotomous subdivision of terminal units involved in lung branching;GO:0010815 bradykinin catabolic process		Predicted intracellular proteins; Peptidases:Cysteine-type peptidases; ENZYME proteins:Hydrolases; Cancer-related genes:Candidate cancer biomarkers; Enzymes	Cytoplasmic bodies;Cytosol;Vesicles (reliability'])	N1-(1-Dimethylcarbamoyl-2-Phenyl-Ethyl)-2-Oxo-N4-(2-Pyridin-2-Yl-Ethyl)-Succinamide; p-Toluenesulfonic acid; N-[1-Hydroxycarboxyethyl-Carbonyl]Leucylamino-2-Methyl-Butane; CARBOBENZYLOXY-(L)-LEUCINYL-(L)LEUCINYL METHOXYMETHYLKETONE	(M3468)NABA ECM REGULATORS; (M5885)NABA MATRISOME ASSOCIATED; (M5889)NABA MATRISOME	(M5946)HALLMARK COAGULATION; (M5921)HALLMARK COMPLEMENT	0	0	0	0	1	1	0	0	1	0	0	0	0	0	0	0	0	0	0	0	1
1870	E2f2	1	0	1870	Gene_ID	H. sapiens	1870	H. sapiens	E2F2	E2F transcription factor 2	GO:1990086 lens fiber cell apoptotic process;GO:0072332 intrinsic apoptotic signaling pathway by p53 class mediator;GO:1903671 negative regulation of sprouting angiogenesis		Transcription factors:Helix-turn-helix domains; Predicted intracellular proteins			(M3686)SA REG CASCADE OF CYCLIN EXPR; (M1529)SA G1 AND S PHASES; (M279)PID RB 1PATHWAY	(M5901)HALLMARK G2M CHECKPOINT; (M5945)HALLMARK HEME METABOLISM	0	0	0	0	1	0	0	0	0	0	0	0	0	0	0	0	0	0	0	0	1
58475	Ms4a7	0	1	58475	Gene_ID	H. sapiens	58475	H. sapiens	MS4A7	membrane spanning 4-domains A7			Predicted intracellular proteins					0	0	0	0	0	0	0	0	0	0	0	0	0	0	0	0	0	0	0	0	1
7175	Tpr	0	1	7175	Gene_ID	H. sapiens	7175	H. sapiens	TPR	translocated promoter region, nuclear basket protein	GO:0031990 mRNA export from nucleus in response to heat stress;GO:0031445 regulation of heterochromatin assembly;GO:0031453 positive regulation of heterochromatin assembly		Predicted intracellular proteins; Disease related genes; Cancer-related genes:Mutational cancer driver genes; Transporters:Transporter channels and pores; Potential drug targets	Nuclear membrane (reliability'])				0	1	0	1	0	0	0	1	0	0	1	0	0	1	0	0	0	0	0	0	1
84868	Havcr2	1	0	84868	Gene_ID	H. sapiens	84868	H. sapiens	HAVCR2	hepatitis A virus cellular receptor 2	GO:0032672 regulation of interleukin-3 production;GO:0032712 negative regulation of interleukin-3 production;GO:0071656 negative regulation of granulocyte colony-stimulating factor production		Disease related genes; Predicted intracellular proteins					1	0	1	0	0	0	0	0	0	1	0	1	0	0	1	1	0	0	1	0	1
2533	Fyb	1	0	2533	Gene_ID	H. sapiens	2533	H. sapiens	FYB1	FYN binding protein 1	GO:0007229 integrin-mediated signaling pathway;GO:0050852 T cell receptor signaling pathway;GO:0072659 protein localization to plasma membrane		Disease related genes; Predicted intracellular proteins	Plasma membrane (reliability']); Additional: Nucleoplasm		(M34)PID TCR PATHWAY	(M5915)HALLMARK APICAL JUNCTION; (M5950)HALLMARK ALLOGRAFT REJECTION	0	0	0	0	0	0	0	0	0	0	0	0	0	0	0	0	0	0	0	0	1
10658	Celf1	1	0	10658	Gene_ID	H. sapiens	10658	H. sapiens	CELF1	CUGBP Elav-like family member 1	GO:0016246 RNA interference;GO:0006376 mRNA splice site selection;GO:0000381 regulation of alternative mRNA splicing, via spliceosome		Predicted intracellular proteins	Nucleoplasm (reliability'])				0	0	0	0	0	0	0	0	0	0	0	0	0	0	0	0	0	0	0	0	1
5153	Pde1b	1	0	5153	Gene_ID	H. sapiens	5153	H. sapiens	PDE1B	phosphodiesterase 1B	GO:0097011 cellular response to granulocyte macrophage colony-stimulating factor stimulus;GO:0097012 response to granulocyte macrophage colony-stimulating factor;GO:0042428 serotonin metabolic process		ENZYME proteins:Hydrolases; Predicted intracellular proteins; Enzymes; FDA approved drug targets:Small molecule drugs		Caffeine; Nicardipine; Felodipine; Bepridil; S,S-(2-Hydroxyethyl)Thiocysteine			0	0	0	0	0	0	0	0	0	0	0	0	0	0	0	0	0	0	0	0	1
3643	Insr	0	1	3643	Gene_ID	H. sapiens	3643	H. sapiens	INSR	insulin receptor	GO:0019087 transformation of host cell by virus;GO:0031017 exocrine pancreas development;GO:0060267 positive regulation of respiratory burst	Tyr protein kinase family	CD markers; Predicted intracellular proteins; FDA approved drug targets:Small molecule drugs; Disease related genes; FDA approved drug targets:Biotech drugs; Enzymes; Kinases:Tyr protein kinases; ENZYME proteins:Transferases; RAS pathway related proteins	Vesicles (reliability']); Additional: Plasma membrane	Insulin human; Insulin lispro; Insulin glargine; Insulin pork; Mecasermin; Insulin aspart; Insulin detemir; Insulin glulisine; Adenosine-5'-[Beta, Gamma-Methylene]Triphosphate; NN344; AT1391; [4-({5-(AMINOCARBONYL)-4-[(3-METHYLPHENYL)AMINO]PYRIMIDIN-2-YL}AMINO)PHENYL]ACETIC ACID; Chromic chloride; Insulin degludec; Fostamatinib; Brigatinib; Mecasermin rinfabate	(M247)PID INSULIN GLUCOSE PATHWAY; (M91)PID TCPTP PATHWAY; (M16)PID INSULIN PATHWAY		0	1	0	1	0	1	0	0	1	0	1	0	0	1	0	0	0	0	0	0	1
151903	Ccdc12	1	0	151903	Gene_ID	H. sapiens	151903	H. sapiens	CCDC12	coiled-coil domain containing 12			Predicted intracellular proteins	Nucleoplasm (reliability'])				0	0	0	0	0	0	0	0	0	0	0	0	0	0	0	0	0	0	0	0	1
1289	Col5a1	0	1	1289	Gene_ID	H. sapiens	1289	H. sapiens	COL5A1	collagen type V alpha 1 chain	GO:1903225 negative regulation of endodermal cell differentiation;GO:1903224 regulation of endodermal cell differentiation;GO:0045112 integrin biosynthetic process		Disease related genes; Predicted secreted proteins; Predicted intracellular proteins; Cancer-related genes:Mutated cancer genes	Vesicles (reliability'])		(M3005)NABA COLLAGENS; (M198)PID SYNDECAN 1 PATHWAY; (M236)PID DELTA NP63 PATHWAY	(M5891)HALLMARK HYPOXIA; (M5930)HALLMARK EPITHELIAL MESENCHYMAL TRANSITION; (M5937)HALLMARK GLYCOLYSIS	0	0	0	0	1	0	0	1	0	0	0	0	1	0	0	0	0	0	0	1	1
100128731	Ost4	0	1	100128731	Gene_ID	H. sapiens	100128731	H. sapiens	OST4	oligosaccharyltransferase complex subunit 4, non-catalytic	GO:0018279 protein N-linked glycosylation via asparagine;GO:0018196 peptidyl-asparagine modification;GO:0006487 protein N-linked glycosylation							0	0	0	1	0	0	0	0	0	0	0	0	0	0	0	0	0	0	0	0	1
152189	Cmtm8	1	0	152189	Gene_ID	H. sapiens	152189	H. sapiens	CMTM8	CKLF like MARVEL transmembrane domain containing 8	GO:0042552 myelination;GO:0007272 ensheathment of neurons;GO:0008366 axon ensheathment			Nucleoplasm (reliability'])				0	0	0	0	0	0	0	0	0	0	0	1	0	0	0	0	0	0	0	0	1
6049	Rnf6	1	0	6049	Gene_ID	H. sapiens	6049	H. sapiens	RNF6	ring finger protein 6	GO:0044314 protein K27-linked ubiquitination;GO:0085020 protein K6-linked ubiquitination;GO:0060765 regulation of androgen receptor signaling pathway		Predicted intracellular proteins; Disease related genes; Enzymes; Potential drug targets; ENZYME proteins:Transferases	Nuclear membrane (reliability'])				0	0	0	0	0	0	0	0	1	1	0	0	0	0	0	0	0	0	0	0	1
64746	Acbd3	1	0	64746	Gene_ID	H. sapiens	64746	H. sapiens	ACBD3	acyl-CoA binding domain containing 3	GO:0006694 steroid biosynthetic process;GO:0008202 steroid metabolic process;GO:0008610 lipid biosynthetic process		Predicted intracellular proteins	Golgi apparatus (reliability'])				0	0	0	0	0	0	0	0	0	0	0	0	0	0	0	0	0	0	0	0	1
140710	Soga1	0	1	140710	Gene_ID	H. sapiens	140710	H. sapiens	SOGA1	suppressor of glucose, autophagy associated 1	GO:0045721 negative regulation of gluconeogenesis;GO:0010677 negative regulation of cellular carbohydrate metabolic process;GO:0006111 regulation of gluconeogenesis		Predicted secreted proteins; Predicted intracellular proteins	Cytosol;Nucleoli (reliability'])				0	0	0	0	0	0	0	0	1	0	0	0	0	0	0	0	0	0	0	0	1
55608	Ankrd10	0	1	55608	Gene_ID	H. sapiens	55608	H. sapiens	ANKRD10	ankyrin repeat domain 10			Predicted intracellular proteins	Microtubules (reliability']); Additional: Cytosol				0	0	0	0	0	0	0	0	0	0	0	0	0	0	0	0	0	0	0	0	1
219854	Tmem218	1	0	219854	Gene_ID	H. sapiens	219854	H. sapiens	TMEM218	transmembrane protein 218			Predicted intracellular proteins	Cytosol;Plasma membrane (reliability'])				0	0	0	0	0	0	0	0	0	0	0	0	0	0	0	0	0	0	0	0	1
25891	Pamr1	1	0	25891	Gene_ID	H. sapiens	25891	H. sapiens	PAMR1	peptidase domain containing associated with muscle regeneration 1			Peptidases:Serine-type peptidases; Predicted secreted proteins; Predicted intracellular proteins; Enzymes			(M3468)NABA ECM REGULATORS; (M5885)NABA MATRISOME ASSOCIATED; (M5889)NABA MATRISOME		0	0	0	0	0	0	0	0	0	0	0	0	0	0	0	0	0	0	0	0	1
9409	Pex16	0	1	9409	Gene_ID	H. sapiens	9409	H. sapiens	PEX16	peroxisomal biogenesis factor 16	GO:0032581 ER-dependent peroxisome organization;GO:0106101 ER-dependent peroxisome localization;GO:0016557 peroxisome membrane biogenesis		Transporters; Disease related genes; Predicted intracellular proteins; Potential drug targets				(M5948)HALLMARK BILE ACID METABOLISM	0	0	0	0	0	0	0	0	0	0	0	0	0	0	0	0	0	0	0	0	1
1108	Chd4	0	1	1108	Gene_ID	H. sapiens	1108	H. sapiens	CHD4	chromodomain helicase DNA binding protein 4	GO:0043044 ATP-dependent chromatin remodeling;GO:0032508 DNA duplex unwinding;GO:0032392 DNA geometric change		Predicted intracellular proteins; Disease related genes; ENZYME proteins:Hydrolases; Cancer-related genes:Mutational cancer driver genes; Enzymes; Potential drug targets; Cancer-related genes:Mutated cancer genes	Nucleoplasm (reliability'])		(M101)PID HDAC CLASSI PATHWAY		0	0	0	0	0	0	0	0	0	0	0	0	0	0	0	0	0	0	0	0	1
2213	Fcgr2b	1	0	2213	Gene_ID	H. sapiens	2213	H. sapiens	FCGR2B	Fc fragment of IgG receptor IIb	GO:0001811 negative regulation of type I hypersensitivity;GO:0001797 negative regulation of type IIa hypersensitivity;GO:0001814 negative regulation of antibody-dependent cellular cytotoxicity		CD markers; Disease related genes; Cancer-related genes; FDA approved drug targets:Biotech drugs		Etanercept; Human immunoglobulin G; Abciximab; Tositumomab; Alemtuzumab; Antithymocyte immunoglobulin (rabbit); Palivizumab; Daclizumab; Bevacizumab; Sarilumab	(M7)PID FCER1 PATHWAY; (M10)PID BCR 5PATHWAY	(M5950)HALLMARK ALLOGRAFT REJECTION	1	0	1	0	0	0	0	0	1	0	0	0	0	0	1	1	0	0	1	0	1
3963	Lgals7	0	1	3963	Gene_ID	H. sapiens	3963	H. sapiens	LGALS7	galectin 7			Predicted intracellular proteins			(M5880)NABA ECM AFFILIATED; (M5885)NABA MATRISOME ASSOCIATED; (M5889)NABA MATRISOME	(M5956)HALLMARK KRAS SIGNALING DN	0	0	0	0	0	0	0	0	0	0	0	0	0	0	0	0	0	0	0	0	1
195827	Aaed1	0	1	195827	Gene_ID	H. sapiens	195827	H. sapiens	PRXL2C	peroxiredoxin like 2C	GO:0045821 positive regulation of glycolytic process;GO:0030813 positive regulation of nucleotide catabolic process;GO:0051197 positive regulation of coenzyme metabolic process		Predicted intracellular proteins					0	1	0	1	0	0	0	0	0	0	1	0	0	0	0	0	0	0	0	0	1
65979	Phactr4	0	1	65979	Gene_ID	H. sapiens	65979	H. sapiens	PHACTR4	phosphatase and actin regulator 4	GO:0061386 closure of optic fissure;GO:2001045 negative regulation of integrin-mediated signaling pathway;GO:0002072 optic cup morphogenesis involved in camera-type eye development		Predicted intracellular proteins	Cytosol;Plasma membrane (reliability']); Additional: Intermediate filaments				0	0	0	0	0	0	0	1	0	0	0	0	0	0	0	0	0	0	0	0	1
490	Atp2b1	0	1	490	Gene_ID	H. sapiens	490	H. sapiens	ATP2B1	ATPase plasma membrane Ca2+ transporting 1	GO:0071386 cellular response to corticosterone stimulus;GO:0071389 cellular response to mineralocorticoid stimulus;GO:0003056 regulation of vascular smooth muscle contraction		ENZYME proteins:Hydrolases; Enzymes	Plasma membrane (reliability'])	Halothane	(M195)PID CMYB PATHWAY	(M5942)HALLMARK UV RESPONSE DN; (M5890)HALLMARK TNFA SIGNALING VIA NFKB; (M5932)HALLMARK INFLAMMATORY RESPONSE	0	0	0	0	0	0	0	0	1	1	0	0	0	0	0	0	0	0	0	0	1
11083	Dido1	0	1	11083	Gene_ID	H. sapiens	11083	H. sapiens	DIDO1	death inducer-obliterator 1	GO:0097190 apoptotic signaling pathway;GO:0006915 apoptotic process;GO:0012501 programmed cell death		Predicted intracellular proteins	Nucleoplasm (reliability']); Additional: Cytosol;Vesicles				0	0	0	0	0	0	0	0	0	0	0	0	0	0	0	0	0	0	0	0	1
6774	Stat3	1	0	6774	Gene_ID	H. sapiens	6774	H. sapiens	STAT3	signal transducer and activator of transcription 3	GO:1902724 positive regulation of skeletal muscle satellite cell proliferation;GO:1902728 positive regulation of growth factor dependent skeletal muscle satellite cell proliferation;GO:1905616 regulation of miRNA mediated inhibition of translation		Disease related genes; Cancer-related genes:Mutational cancer driver genes; Transcription factors:Immunoglobulin fold; Predicted intracellular proteins	Cytosol;Nucleoplasm (reliability'])	ENMD-1198	(M36)PID IL27 PATHWAY; (M290)PID IL12 STAT4 PATHWAY; (M127)PID ERBB1 RECEPTOR PROXIMAL PATHWAY	(M5897)HALLMARK IL6 JAK STAT3 SIGNALING; (M5913)HALLMARK INTERFERON GAMMA RESPONSE	1	1	1	1	1	1	0	0	1	1	1	1	0	0	0	0	0	0	1	0	1
93058	Coq10a	1	0	93058	Gene_ID	H. sapiens	93058	H. sapiens	COQ10A	coenzyme Q10A	GO:0006744 ubiquinone biosynthetic process;GO:1901663 quinone biosynthetic process;GO:0006743 ubiquinone metabolic process		Predicted intracellular proteins	Cytosol (reliability']); Additional: Endoplasmic reticulum;Golgi apparatus				0	1	0	1	0	0	0	0	0	0	0	0	0	0	0	0	0	0	0	0	1
27327	Tnrc6a	0	1	27327	Gene_ID	H. sapiens	27327	H. sapiens	TNRC6A	trinucleotide repeat containing adaptor 6A	GO:0060213 positive regulation of nuclear-transcribed mRNA poly(A) tail shortening;GO:0060211 regulation of nuclear-transcribed mRNA poly(A) tail shortening;GO:1900153 positive regulation of nuclear-transcribed mRNA catabolic process, deadenylation-dependent decay		Predicted intracellular proteins	Golgi apparatus;Nucleoplasm;Vesicles (reliability'])				0	0	0	0	0	0	0	0	0	0	0	0	0	0	0	0	0	0	0	0	1
6233	Rps27a	0	1	6233	Gene_ID	H. sapiens	6233	H. sapiens	RPS27A	ribosomal protein S27a	GO:0042276 error-prone translesion synthesis;GO:0000717 nucleotide-excision repair, DNA duplex unwinding;GO:0070987 error-free translesion synthesis		Ribosomal proteins; Predicted intracellular proteins	Cytosol;Endoplasmic reticulum;Nucleoli (reliability'])				0	0	0	0	0	0	0	0	0	1	0	0	0	1	0	1	0	0	0	0	1
916	Cd3e	1	0	916	Gene_ID	H. sapiens	916	H. sapiens	CD3E	CD3e molecule	GO:0002669 positive regulation of T cell anergy;GO:0002913 positive regulation of lymphocyte anergy;GO:0002249 lymphocyte anergy		CD markers; Disease related genes; FDA approved drug targets:Biotech drugs		Muromonab; Catumaxomab	(M290)PID IL12 STAT4 PATHWAY; (M196)PID IL23 PATHWAY; (M88)PID CD8 TCR PATHWAY	(M5950)HALLMARK ALLOGRAFT REJECTION	0	0	1	0	0	0	0	0	0	0	0	0	0	0	0	0	0	0	0	0	1
79876	Uba5	1	0	79876	Gene_ID	H. sapiens	79876	H. sapiens	UBA5	ubiquitin like modifier activating enzyme 5	GO:1990564 protein polyufmylation;GO:1990592 protein K69-linked ufmylation;GO:0071569 protein ufmylation		Disease related genes; Predicted intracellular proteins	Cytosol (reliability']); Additional: Vesicles				0	0	0	0	0	0	0	0	1	1	0	0	0	0	0	0	0	0	0	0	1
79077	Dctpp1	0	1	79077	Gene_ID	H. sapiens	79077	H. sapiens	DCTPP1	dCTP pyrophosphatase 1	GO:0006253 dCTP catabolic process;GO:0046065 dCTP metabolic process;GO:0046076 dTTP catabolic process		ENZYME proteins:Hydrolases; Predicted intracellular proteins; Enzymes	Cytosol;Nucleoplasm (reliability'])			(M5928)HALLMARK MYC TARGETS V2; (M5925)HALLMARK E2F TARGETS	0	0	0	1	0	0	0	0	0	0	0	0	0	0	0	0	0	0	0	0	1
3270	Hrc	1	0	3270	Gene_ID	H. sapiens	3270	H. sapiens	HRC	histidine rich calcium binding protein	GO:1901079 positive regulation of relaxation of muscle;GO:1901899 positive regulation of relaxation of cardiac muscle;GO:1901897 regulation of relaxation of cardiac muscle		Predicted intracellular proteins				(M5909)HALLMARK MYOGENESIS	0	0	0	0	0	0	1	0	0	0	0	0	0	0	0	0	0	0	0	0	1
25875	Letmd1	0	1	25875	Gene_ID	H. sapiens	25875	H. sapiens	LETMD1	LETM1 domain containing 1			Predicted intracellular proteins	Mitochondria (reliability']); Additional: Nucleoli;Nucleoplasm				0	0	0	0	0	0	0	0	0	0	0	0	0	0	0	0	0	0	0	0	1
177	Ager	1	0	177	Gene_ID	H. sapiens	177	H. sapiens	AGER	advanced glycosylation end-product specific receptor	GO:1904470 regulation of endothelin secretion;GO:1904472 positive regulation of endothelin secretion;GO:1990775 endothelin secretion		Cancer-related genes:Candidate cancer biomarkers; Predicted secreted proteins	Cell Junctions;Plasma membrane (reliability']); Additional: Nucleoli fibrillar center		(M159)PID AMB2 NEUTROPHILS PATHWAY	(M5947)HALLMARK IL2 STAT5 SIGNALING	1	0	1	0	0	1	0	0	1	0	0	1	0	0	0	0	0	0	1	1	1
51365	Pla1a	1	0	51365	Gene_ID	H. sapiens	51365	H. sapiens	PLA1A	phospholipase A1 member A	GO:0036150 phosphatidylserine acyl-chain remodeling;GO:0006658 phosphatidylserine metabolic process;GO:0006575 cellular modified amino acid metabolic process		Predicted secreted proteins; Predicted intracellular proteins; RAS pathway related proteins	Cytoplasmic bodies;Nuclear speckles (reliability']); Additional: Nucleoplasm				0	0	0	0	0	0	0	0	0	0	1	0	0	0	0	0	0	0	0	0	1
9231	Dlg5	0	1	9231	Gene_ID	H. sapiens	9231	H. sapiens	DLG5	discs large MAGUK scaffold protein 5	GO:0045186 zonula adherens assembly;GO:0035332 positive regulation of hippo signaling;GO:0071896 protein localization to adherens junction		Predicted intracellular proteins	Cell Junctions (reliability'])			(M5907)HALLMARK ESTROGEN RESPONSE LATE	0	0	1	0	0	0	0	0	0	0	0	0	0	0	1	0	0	0	0	0	1
2787	Gng5	0	1	2787	Gene_ID	H. sapiens	2787	H. sapiens	GNG5	G protein subunit gamma 5	GO:0007186 G protein-coupled receptor signaling pathway;GO:0007165 signal transduction;GO:0023052 signaling		Predicted intracellular proteins; RAS pathway related proteins					0	1	0	0	0	0	0	0	0	0	0	1	0	0	0	0	0	0	0	0	1
5827	Pxmp2	1	0	5827	Gene_ID	H. sapiens	5827	H. sapiens	PXMP2	peroxisomal membrane protein 2	GO:0008150 biological_process		Transporters; Predicted intracellular proteins				(M5948)HALLMARK BILE ACID METABOLISM	0	0	0	0	0	0	0	0	0	0	0	0	0	0	0	0	0	0	0	0	1
4088	Smad3	1	0	4088	Gene_ID	H. sapiens	4088	H. sapiens	SMAD3	SMAD family member 3	GO:0061767 negative regulation of lung blood pressure;GO:0032916 positive regulation of transforming growth factor beta3 production;GO:0097296 activation of cysteine-type endopeptidase activity involved in apoptotic signaling pathway		Transcription factors:beta-Hairpin exposed by an alpha/beta-scaffold; Cancer-related genes:Candidate cancer biomarkers; Disease related genes; Predicted intracellular proteins	Nucleoplasm (reliability']); Additional: Cytosol		(M228)PID SMAD2 3PATHWAY; (M286)PID TGFBR PATHWAY; (M254)PID MYC REPRESS PATHWAY	(M5896)HALLMARK TGF BETA SIGNALING; (M5942)HALLMARK UV RESPONSE DN; (M5890)HALLMARK TNFA SIGNALING VIA NFKB	0	0	1	0	0	1	1	1	0	0	0	1	1	1	0	0	0	1	1	1	1
11010	Glipr1	1	0	11010	Gene_ID	H. sapiens	11010	H. sapiens	GLIPR1	GLI pathogenesis related 1	GO:0019216 regulation of lipid metabolic process;GO:0043312 neutrophil degranulation;GO:0002283 neutrophil activation involved in immune response		Predicted intracellular proteins		SOT-107		(M5930)HALLMARK EPITHELIAL MESENCHYMAL TRANSITION	1	0	0	0	0	0	0	0	0	0	1	0	0	0	0	0	0	0	0	0	1
58489	Abhd17c	1	0	58489	Gene_ID	H. sapiens	58489	H. sapiens	ABHD17C	abhydrolase domain containing 17C, depalmitoylase	GO:1902816 regulation of protein localization to microtubule;GO:1902817 negative regulation of protein localization to microtubule;GO:0002084 protein depalmitoylation		ENZYME proteins:Hydrolases; Predicted intracellular proteins; Enzymes					0	0	0	0	0	0	0	0	0	0	0	0	0	0	0	0	0	0	0	0	1
4133	Map2	1	0	4133	Gene_ID	H. sapiens	4133	H. sapiens	MAP2	microtubule associated protein 2	GO:2000575 negative regulation of microtubule motor activity;GO:1901951 regulation of anterograde dense core granule transport;GO:1901953 positive regulation of anterograde dense core granule transport		FDA approved drug targets:Small molecule drugs; Predicted intracellular proteins		Estramustine; Paclitaxel; Docetaxel	(M87)PID LKB1 PATHWAY		0	0	0	0	0	1	0	1	0	0	0	0	0	0	0	0	0	0	0	0	1
145957	Nrg4	1	0	145957	Gene_ID	H. sapiens	145957	H. sapiens	NRG4	neuregulin 4	GO:0038128 ERBB2 signaling pathway;GO:0038127 ERBB signaling pathway;GO:0051897 positive regulation of protein kinase B signaling		Predicted secreted proteins			(M201)PID ERBB NETWORK PATHWAY; (M13)PID ERBB4 PATHWAY; (M5883)NABA SECRETED FACTORS		0	0	0	0	0	0	0	0	0	0	0	0	0	0	0	0	0	0	0	0	1
85235	Hist1h2ah	1	0	85235	Gene_ID	H. sapiens	85235	H. sapiens	H2AC12	H2A clustered histone 12	GO:0006342 chromatin silencing;GO:0045814 negative regulation of gene expression, epigenetic;GO:0006325 chromatin organization		Predicted intracellular proteins					0	0	0	0	0	0	0	0	0	0	0	0	0	0	0	0	0	0	0	0	1
144404	Tmem120b	0	1	144404	Gene_ID	H. sapiens	144404	H. sapiens	TMEM120B	transmembrane protein 120B	GO:0051291 protein heterooligomerization;GO:0051259 protein complex oligomerization;GO:0045444 fat cell differentiation		Predicted intracellular proteins	Nucleoli fibrillar center (reliability']); Additional: Cytosol				0	0	0	0	0	0	0	0	0	0	0	0	0	0	0	0	0	0	0	0	1
6535	Slc6a8	0	1	6535	Gene_ID	H. sapiens	6535	H. sapiens	SLC6A8	solute carrier family 6 member 8	GO:0015881 creatine transmembrane transport;GO:0006600 creatine metabolic process;GO:0072337 modified amino acid transport		FDA approved drug targets:Small molecule drugs; Disease related genes; Predicted intracellular proteins; Transporters:Electrochemical Potential-driven transporters		Creatine; Phosphocreatine		(M5941)HALLMARK UV RESPONSE UP; (M5909)HALLMARK MYOGENESIS; (M5930)HALLMARK EPITHELIAL MESENCHYMAL TRANSITION	0	0	0	0	0	0	0	0	0	0	0	0	0	0	0	0	0	0	0	0	1
4210	Mefv	1	0	4210	Gene_ID	H. sapiens	4210	H. sapiens	MEFV	MEFV innate immuity regulator, pyrin	GO:0071641 negative regulation of macrophage inflammatory protein 1 alpha production;GO:0071608 macrophage inflammatory protein-1 alpha production;GO:0071640 regulation of macrophage inflammatory protein 1 alpha production		Disease related genes; Predicted intracellular proteins	Nucleoplasm (reliability']); Additional: Cytosol			(M5932)HALLMARK INFLAMMATORY RESPONSE; (M5956)HALLMARK KRAS SIGNALING DN	0	0	0	0	0	0	0	0	0	0	0	0	0	0	0	0	0	0	0	0	1
4681	Nbl1	1	0	4681	Gene_ID	H. sapiens	4681	H. sapiens	NBL1	NBL1, DAN family BMP antagonist	GO:0038098 sequestering of BMP from receptor via BMP binding;GO:0035582 sequestering of BMP in extracellular matrix;GO:0090027 negative regulation of monocyte chemotaxis		Predicted secreted proteins; Predicted intracellular proteins				(M5906)HALLMARK ESTROGEN RESPONSE EARLY; (M5907)HALLMARK ESTROGEN RESPONSE LATE	0	0	0	0	0	0	0	0	0	0	0	1	0	1	1	0	0	0	0	0	1
9659	Pde4dip	1	0	9659	Gene_ID	H. sapiens	9659	H. sapiens	PDE4DIP	phosphodiesterase 4D interacting protein	GO:1903358 regulation of Golgi organization;GO:0007030 Golgi organization;GO:0010256 endomembrane system organization		Predicted intracellular proteins; Disease related genes; Cancer-related genes	Golgi apparatus (reliability'])			(M5909)HALLMARK MYOGENESIS	0	0	0	0	0	0	0	0	0	0	0	0	0	0	0	0	0	0	0	0	1
9555	H2afy	0	1	9555	Gene_ID	H. sapiens	9555	H. sapiens	MACROH2A1	macroH2A.1 histone	GO:1903226 positive regulation of endodermal cell differentiation;GO:1904815 negative regulation of protein localization to chromosome, telomeric region;GO:0033128 negative regulation of histone phosphorylation		Predicted intracellular proteins	Nucleoplasm (reliability'])		(M166)PID ATF2 PATHWAY		0	0	0	0	0	0	0	0	0	0	0	0	0	0	0	0	0	0	0	0	1
64581	Clec7a	1	0	64581	Gene_ID	H. sapiens	64581	H. sapiens	CLEC7A	C-type lectin domain containing 7A	GO:0032491 detection of molecule of fungal origin;GO:0016046 detection of fungus;GO:0002238 response to molecule of fungal origin		Disease related genes; Predicted intracellular proteins			(M5880)NABA ECM AFFILIATED; (M5885)NABA MATRISOME ASSOCIATED; (M5889)NABA MATRISOME		0	0	1	0	0	1	0	0	0	0	0	1	0	0	0	1	0	0	0	1	1
51621	Klf13	0	1	51621	Gene_ID	H. sapiens	51621	H. sapiens	KLF13	Kruppel like factor 13	GO:0045647 negative regulation of erythrocyte differentiation;GO:0045646 regulation of erythrocyte differentiation;GO:0045638 negative regulation of myeloid cell differentiation		Transcription factors:Zinc-coordinating DNA-binding domains; Predicted intracellular proteins					0	0	0	0	0	0	0	0	0	0	0	0	0	0	1	0	0	0	0	0	1
140576	S100a16	0	1	140576	Gene_ID	H. sapiens	140576	H. sapiens	S100A16	S100 calcium binding protein A16	GO:0051592 response to calcium ion;GO:0010038 response to metal ion;GO:0010035 response to inorganic substance		Transporters:Accessory Factors Involved in Transport; Predicted intracellular proteins	Cytosol (reliability']); Additional: Plasma membrane	Calcium citrate; Calcium Phosphate; Calcium phosphate dihydrate	(M5883)NABA SECRETED FACTORS; (M5885)NABA MATRISOME ASSOCIATED; (M5889)NABA MATRISOME		0	0	0	0	0	0	0	0	0	0	0	0	0	0	0	0	1	0	0	0	1
5660	Psap	0	1	5660	Gene_ID	H. sapiens	5660	H. sapiens	PSAP	prosaposin	GO:1905572 ganglioside GM1 transport to membrane;GO:0003335 corneocyte development;GO:0006683 galactosylceramide catabolic process		Potential drug targets; Disease related genes; Predicted intracellular proteins; Transporters:Transporter channels and pores	Vesicles (reliability'])	Di-Stearoyl-3-Sn-Phosphatidylethanolamine			0	0	1	0	0	0	0	0	0	0	1	0	0	0	0	0	1	0	0	0	1
11059	Wwp1	1	0	11059	Gene_ID	H. sapiens	11059	H. sapiens	WWP1	WW domain containing E3 ubiquitin protein ligase 1	GO:0046718 viral entry into host cell;GO:0030260 entry into host cell;GO:0044409 entry into host		ENZYME proteins:Transferases; Predicted intracellular proteins; Enzymes	Cytosol (reliability']); Additional: Golgi apparatus;Plasma membrane		(M13)PID ERBB4 PATHWAY; (M236)PID DELTA NP63 PATHWAY; (M256)PID TAP63 PATHWAY	(M5939)HALLMARK P53 PATHWAY	0	0	0	0	0	0	0	0	0	0	0	0	0	0	0	0	0	0	0	0	1
6328	Scn3a	1	0	6328	Gene_ID	H. sapiens	6328	H. sapiens	SCN3A	sodium voltage-gated channel alpha subunit 3	GO:0019228 neuronal action potential;GO:0086010 membrane depolarization during action potential;GO:0019226 transmission of nerve impulse		FDA approved drug targets:Small molecule drugs; Voltage-gated ion channels:Voltage-Gated Sodium Channels		Phenytoin; Zonisamide; Tetrodotoxin; Lacosamide			0	0	0	0	0	0	1	0	0	0	0	0	0	0	0	0	0	0	0	0	1
6441	Sftpd	1	0	6441	Gene_ID	H. sapiens	6441	H. sapiens	SFTPD	surfactant protein D	GO:0044651 adhesion of symbiont to host epithelial cell;GO:1905226 regulation of adhesion of symbiont to host epithelial cell;GO:0052405 negative regulation by host of symbiont molecular function		Predicted secreted proteins		Beta-D-Glucose	(M285)PID HNF3A PATHWAY; (M279)PID RB 1PATHWAY; (M5880)NABA ECM AFFILIATED		0	0	1	0	0	0	0	0	0	0	0	1	0	0	1	1	0	0	0	0	1
54477	Plekha5	0	1	54477	Gene_ID	H. sapiens	54477	H. sapiens	PLEKHA5	pleckstrin homology domain containing A5	GO:0061458 reproductive system development;GO:0048731 system development;GO:0007275 multicellular organism development		Predicted intracellular proteins	Cytosol;Nucleoplasm (reliability'])				0	0	0	0	0	0	0	0	0	0	1	0	0	0	0	0	0	0	0	0	1
57472	Cnot6	1	0	57472	Gene_ID	H. sapiens	57472	H. sapiens	CNOT6	CCR4-NOT transcription complex subunit 6	GO:2000327 positive regulation of nuclear receptor transcription coactivator activity;GO:2000325 regulation of nuclear receptor transcription coactivator activity;GO:0070966 nuclear-transcribed mRNA catabolic process, no-go decay		ENZYME proteins:Hydrolases; Predicted intracellular proteins; Enzymes	Cytosol (reliability'])			(M5922)HALLMARK UNFOLDED PROTEIN RESPONSE	0	0	0	0	0	0	0	0	0	0	0	1	0	0	0	0	0	0	0	0	1
9912	Arhgap44	1	0	9912	Gene_ID	H. sapiens	9912	H. sapiens	ARHGAP44	Rho GTPase activating protein 44	GO:0098886 modification of dendritic spine;GO:0099152 regulation of neurotransmitter receptor transport, endosome to postsynaptic membrane;GO:0051490 negative regulation of filopodium assembly		Predicted intracellular proteins					0	0	0	0	0	0	0	1	0	0	0	0	0	0	0	0	0	0	1	0	1
1974	Eif4a2	0	1	1974	Gene_ID	H. sapiens	1974	H. sapiens	EIF4A2	eukaryotic translation initiation factor 4A2	GO:1900259 regulation of RNA-directed 5'-3' RNA polymerase activity;GO:1900260 negative regulation of RNA-directed 5'-3' RNA polymerase activity;GO:0002183 cytoplasmic translational initiation		ENZYME proteins:Hydrolases; Cancer-related genes:Mutational cancer driver genes; Predicted intracellular proteins; Enzymes	Cytosol (reliability'])			(M5922)HALLMARK UNFOLDED PROTEIN RESPONSE; (M5909)HALLMARK MYOGENESIS	0	0	0	0	0	0	0	0	0	0	0	0	0	0	0	0	0	0	0	0	1
3032	Hadhb	0	1	3032	Gene_ID	H. sapiens	3032	H. sapiens	HADHB	hydroxyacyl-CoA dehydrogenase trifunctional multienzyme complex subunit beta	GO:0035965 cardiolipin acyl-chain remodeling;GO:0032048 cardiolipin metabolic process;GO:0046471 phosphatidylglycerol metabolic process		Predicted intracellular proteins; Disease related genes; Enzymes; Potential drug targets; ENZYME proteins:Transferases	Mitochondria (reliability'])			(M5935)HALLMARK FATTY ACID METABOLISM; (M5936)HALLMARK OXIDATIVE PHOSPHORYLATION	0	0	0	0	0	0	0	0	0	0	1	0	0	0	0	0	0	0	0	0	1
57187	Thoc2	1	0	57187	Gene_ID	H. sapiens	57187	H. sapiens	THOC2	THO complex 2	GO:0010793 regulation of mRNA export from nucleus;GO:2000197 regulation of ribonucleoprotein complex localization;GO:0046784 viral mRNA export from host cell nucleus		Disease related genes; Predicted intracellular proteins	Nucleoplasm (reliability'])				0	0	0	0	0	0	0	0	0	0	0	0	0	0	0	0	0	0	1	0	1
4818	Nkg7	0	1	4818	Gene_ID	H. sapiens	4818	H. sapiens	NKG7	natural killer cell granule protein 7			Predicted intracellular proteins	Vesicles (reliability'])				0	0	0	0	0	0	0	0	0	0	0	0	0	0	0	0	0	0	0	0	1
6347	Ccl2	0	1	6347	Gene_ID	H. sapiens	6347	H. sapiens	CCL2	C-C motif chemokine ligand 2	GO:0035684 helper T cell extravasation;GO:2000502 negative regulation of natural killer cell chemotaxis;GO:1901624 negative regulation of lymphocyte chemotaxis		FDA approved drug targets:Small molecule drugs; Cancer-related genes:Candidate cancer biomarkers; Candidate cardiovascular disease genes; Predicted secreted proteins	Golgi apparatus (reliability']); Additional: Vesicles	Mimosine; Danazol; Chondroitin sulfate	(M22)PID GMCSF PATHWAY; (M65)PID FRA PATHWAY; (M196)PID IL23 PATHWAY	(M5922)HALLMARK UNFOLDED PROTEIN RESPONSE; (M5890)HALLMARK TNFA SIGNALING VIA NFKB; (M5913)HALLMARK INTERFERON GAMMA RESPONSE	0	0	1	0	1	0	0	0	0	1	0	1	0	1	1	1	0	0	0	0	1
146722	Cd300lf	1	0	146722	Gene_ID	H. sapiens	146722	H. sapiens	CD300LF	CD300 molecule like family member f	GO:0035772 interleukin-13-mediated signaling pathway;GO:2000426 negative regulation of apoptotic cell clearance;GO:0034125 negative regulation of MyD88-dependent toll-like receptor signaling pathway		CD markers; Predicted intracellular proteins					1	0	1	0	0	0	0	0	0	0	0	0	0	0	1	0	0	0	0	0	1
51312	Slc25a37	0	1	51312	Gene_ID	H. sapiens	51312	H. sapiens	SLC25A37	solute carrier family 25 member 37	GO:0048250 iron import into the mitochondrion;GO:0097286 iron ion import;GO:0034755 iron ion transmembrane transport		Transporters:Electrochemical Potential-driven transporters; Predicted intracellular proteins	Cytosol;Mitochondria (reliability'])			(M5945)HALLMARK HEME METABOLISM	0	0	0	0	0	0	0	0	0	0	0	0	0	0	0	0	0	0	0	0	1
23002	Daam1	1	0	23002	Gene_ID	H. sapiens	23002	H. sapiens	DAAM1	dishevelled associated activator of morphogenesis 1	GO:0060071 Wnt signaling pathway, planar cell polarity pathway;GO:0090175 regulation of establishment of planar polarity;GO:0001736 establishment of planar polarity		Predicted intracellular proteins	Cytosol;Plasma membrane (reliability'])		(M23)PID WNT NONCANONICAL PATHWAY; (M5493)WNT SIGNALING	(M5945)HALLMARK HEME METABOLISM	0	0	0	0	0	0	0	1	0	0	0	0	0	0	0	0	0	0	0	0	1
57124	Cd248	1	0	57124	Gene_ID	H. sapiens	57124	H. sapiens	CD248	CD248 molecule	GO:0048535 lymph node development;GO:0060033 anatomical structure regression;GO:2000353 positive regulation of endothelial cell apoptotic process		CD markers	Plasma membrane (reliability']); Additional: Nucleoplasm				0	0	0	0	0	0	0	0	0	0	0	0	0	0	0	0	0	0	0	0	1
6699	Sprr1b	0	1	6699	Gene_ID	H. sapiens	6699	H. sapiens	SPRR1B	small proline rich protein 1B	GO:0018149 peptide cross-linking;GO:0070268 cornification;GO:0031424 keratinization		Cancer-related genes:Candidate cancer biomarkers; Predicted intracellular proteins					0	0	0	0	0	0	0	0	0	0	0	0	0	0	0	0	0	0	0	0	1
162989	Dedd2	1	0	162989	Gene_ID	H. sapiens	162989	H. sapiens	DEDD2	death effector domain containing 2	GO:0016075 rRNA catabolic process;GO:0030262 apoptotic nuclear changes;GO:0006921 cellular component disassembly involved in execution phase of apoptosis		Predicted intracellular proteins	Nucleoplasm (reliability'])				0	0	0	0	0	0	0	0	0	0	0	0	0	0	0	0	0	0	0	0	1
4026	Lpp	0	1	4026	Gene_ID	H. sapiens	4026	H. sapiens	LPP	LIM domain containing preferred translocation partner in lipoma	GO:0098609 cell-cell adhesion;GO:0007155 cell adhesion;GO:0022610 biological adhesion		Disease related genes; Cancer-related genes:Mutational cancer driver genes; Predicted intracellular proteins	Cytosol;Focal adhesion sites (reliability'])		(M232)PID ECADHERIN STABILIZATION PATHWAY		0	0	0	0	0	0	0	0	0	0	0	0	0	0	0	0	0	0	0	0	1
50808	Ak3	0	1	50808	Gene_ID	H. sapiens	50808	H. sapiens	AK3	adenylate kinase 3	GO:0046041 ITP metabolic process;GO:0006172 ADP biosynthetic process;GO:0009136 purine nucleoside diphosphate biosynthetic process		ENZYME proteins:Transferases; Predicted intracellular proteins; Enzymes	Mitochondria (reliability'])			(M5898)HALLMARK DNA REPAIR; (M5937)HALLMARK GLYCOLYSIS	0	0	0	1	0	0	0	0	0	0	0	0	0	0	0	0	0	0	0	1	1
7422	Vegfa	1	0	7422	Gene_ID	H. sapiens	7422	H. sapiens	VEGFA	vascular endothelial growth factor A	GO:1903570 regulation of protein kinase D signaling;GO:1903572 positive regulation of protein kinase D signaling;GO:1901551 negative regulation of endothelial cell development		Predicted intracellular proteins; FDA approved drug targets:Small molecule drugs; Disease related genes; FDA approved drug targets:Biotech drugs; Cancer-related genes:Candidate cancer biomarkers; Predicted secreted proteins; Candidate cardiovascular disease genes; RAS pathway related proteins		Bevacizumab; Minocycline; Gliclazide; Carvedilol; Ranibizumab; Pidolic acid; Vandetanib; ABT-510; Veglin; Denibulin; SNS-032; Bevasiranib; Dalteparin; Aflibercept; Chondroitin sulfate; Foreskin keratinocyte (neonatal); Brolucizumab	(M137)PID VEGF VEGFR PATHWAY; (M103)PID S1P S1P1 PATHWAY; (M118)PID INTEGRIN A9B1 PATHWAY	(M5919)HALLMARK HEDGEHOG SIGNALING; (M5944)HALLMARK ANGIOGENESIS; (M5922)HALLMARK UNFOLDED PROTEIN RESPONSE	1	0	1	0	1	1	0	0	0	0	0	1	1	1	1	0	0	1	0	1	1
33	Acadl	1	0	33	Gene_ID	H. sapiens	33	H. sapiens	ACADL	acyl-CoA dehydrogenase long chain	GO:0042413 carnitine catabolic process;GO:0019254 carnitine metabolic process, CoA-linked;GO:0006579 amino-acid betaine catabolic process		ENZYME proteins:Oxidoreductases; Predicted intracellular proteins; Enzymes				(M5935)HALLMARK FATTY ACID METABOLISM; (M5905)HALLMARK ADIPOGENESIS	0	0	0	0	0	0	0	0	0	0	1	0	0	0	0	0	0	0	0	0	1
55435	Ap1ar	0	1	55435	Gene_ID	H. sapiens	55435	H. sapiens	AP1AR	adaptor related protein complex 1 associated regulatory protein	GO:0048203 vesicle targeting, trans-Golgi to endosome;GO:0001920 negative regulation of receptor recycling;GO:1900025 negative regulation of substrate adhesion-dependent cell spreading		Predicted intracellular proteins	Golgi apparatus (reliability'])				0	0	1	0	0	0	0	1	0	0	0	0	0	0	1	0	0	0	0	0	1
3710	Itpr3	0	1	3710	Gene_ID	H. sapiens	3710	H. sapiens	ITPR3	inositol 1,4,5-trisphosphate receptor type 3	GO:0050917 sensory perception of umami taste;GO:0050916 sensory perception of sweet taste;GO:0050913 sensory perception of bitter taste			Vesicles (reliability'])		(M1315)SIG PIP3 SIGNALING IN B LYMPHOCYTES; (M5193)SIG CHEMOTAXIS; (M8626)SIG BCR SIGNALING PATHWAY		0	1	0	0	0	0	0	0	0	0	0	0	0	0	0	0	1	0	0	1	1
91612	Churc1	0	1	91612	Gene_ID	H. sapiens	91612	H. sapiens	CHURC1	churchill domain containing 1	GO:0045893 positive regulation of transcription, DNA-templated;GO:1903508 positive regulation of nucleic acid-templated transcription;GO:1902680 positive regulation of RNA biosynthetic process		Predicted intracellular proteins	Cytosol (reliability'])				0	0	0	0	0	0	0	0	0	0	0	0	0	0	0	0	0	0	0	0	1
57146	Tmem159	1	0	57146	Gene_ID	H. sapiens	57146	H. sapiens	TMEM159	transmembrane protein 159	GO:0140042 lipid droplet formation;GO:0034389 lipid droplet organization;GO:0019915 lipid storage		Predicted intracellular proteins	Vesicles (reliability'])				0	0	0	0	0	0	0	0	0	0	0	0	0	0	0	0	0	0	0	0	1
730249	Acod1	1	0	730249	Gene_ID	H. sapiens	730249	H. sapiens	ACOD1	aconitate decarboxylase 1	GO:0072573 tolerance induction to lipopolysaccharide;GO:0002760 positive regulation of antimicrobial humoral response;GO:0071393 cellular response to progesterone stimulus		ENZYME proteins:Lyases; Predicted intracellular proteins; Enzymes					0	0	0	0	0	0	0	0	1	1	0	1	0	0	1	1	0	0	0	0	1
4057	Ltf	1	0	4057	Gene_ID	H. sapiens	4057	H. sapiens	LTF	lactotransferrin	GO:0033214 iron assimilation by chelation and transport;GO:1900159 positive regulation of bone mineralization involved in bone maturation;GO:2000308 negative regulation of tumor necrosis factor (ligand) superfamily member 11 production		Cancer-related genes:Candidate cancer biomarkers; Predicted secreted proteins; Predicted intracellular proteins		3h-Indole-5,6-Diol; Lauric acid; Nitrilotriacetic acid; alpha-D-Fucopyranose; Nimesulide; (R)-Atenolol; Parecoxib		(M5907)HALLMARK ESTROGEN RESPONSE LATE; (M5921)HALLMARK COMPLEMENT	1	0	0	0	0	0	1	0	0	1	0	0	0	0	1	1	0	0	0	0	1
23255	Mtcl1	1	0	23255	Gene_ID	H. sapiens	23255	H. sapiens	MTCL1	microtubule crosslinking factor 1	GO:2000576 positive regulation of microtubule motor activity;GO:2000574 regulation of microtubule motor activity;GO:0090314 positive regulation of protein targeting to membrane		Predicted intracellular proteins					0	0	0	0	0	0	0	0	0	0	0	0	0	0	0	0	0	0	1	0	1
7916	Prrc2a	0	1	7916	Gene_ID	H. sapiens	7916	H. sapiens	PRRC2A	proline rich coiled-coil 2A	GO:0030154 cell differentiation;GO:0048869 cellular developmental process;GO:0032502 developmental process		Predicted intracellular proteins	Cytosol (reliability']); Additional: Nucleoplasm;Plasma membrane				0	0	0	0	0	0	0	0	0	0	0	0	0	0	0	0	0	0	0	0	1
288	Ank3	1	0	288	Gene_ID	H. sapiens	288	H. sapiens	ANK3	ankyrin 3	GO:1900827 positive regulation of membrane depolarization during cardiac muscle cell action potential;GO:0010650 positive regulation of cell communication by electrical coupling;GO:0072658 maintenance of protein location in membrane		Disease related genes; Predicted intracellular proteins; Cancer-related genes:Mutated cancer genes	Plasma membrane (reliability'])				0	0	1	0	0	0	0	0	0	0	0	0	0	0	0	0	1	0	1	1	1
643988	Fndc10	1	0	643988	Gene_ID	H. sapiens	643988	H. sapiens	FNDC10	fibronectin type III domain containing 10								0	0	0	0	0	0	0	0	0	0	0	0	0	0	0	0	0	0	0	0	1
26469	Ptpn18	0	1	26469	Gene_ID	H. sapiens	26469	H. sapiens	PTPN18	protein tyrosine phosphatase non-receptor type 18	GO:0038128 ERBB2 signaling pathway;GO:0001825 blastocyst formation;GO:1901185 negative regulation of ERBB signaling pathway		ENZYME proteins:Hydrolases; Predicted intracellular proteins; Enzymes	Intermediate filaments (reliability'])				0	0	0	0	0	0	0	0	0	0	0	0	0	0	0	0	0	0	0	0	1
116984	Arap2	1	0	116984	Gene_ID	H. sapiens	116984	H. sapiens	ARAP2	ArfGAP with RhoGAP domain, ankyrin repeat and PH domain 2	GO:0051056 regulation of small GTPase mediated signal transduction;GO:0043547 positive regulation of GTPase activity;GO:0043087 regulation of GTPase activity		Predicted intracellular proteins	Focal adhesion sites (reliability']); Additional: Actin filaments		(M86)PID ARF6 PATHWAY		0	0	0	0	0	0	0	0	0	0	0	0	0	0	0	0	0	0	0	0	1
7134	Tnnc1	1	0	7134	Gene_ID	H. sapiens	7134	H. sapiens	TNNC1	troponin C1, slow skeletal and cardiac type	GO:0032972 regulation of muscle filament sliding speed;GO:0002086 diaphragm contraction;GO:0003011 involuntary skeletal muscle contraction		FDA approved drug targets:Small molecule drugs; Disease related genes; Predicted intracellular proteins	Actin filaments;Mitochondria;Nucleoplasm (reliability'])	Trifluoperazine; Levosimendan; Felodipine; Bepridil; Calcium; Aluminium monostearate; 5-[1-(3,4-Dimethoxy-Benzoyl)-1,2,3,4-Tetrahydro-Quinolin-6-Yl]-6-Methyl-3,6-Dihydro-[1,3,4]Thiadiazin-2-One; N-(6-Aminohexyl)-5-Chloro-1-Naphthalenesulfonamide		(M5907)HALLMARK ESTROGEN RESPONSE LATE; (M5909)HALLMARK MYOGENESIS	0	0	0	0	0	0	1	1	0	0	0	0	0	0	0	0	1	1	0	0	1
10095	Arpc1b	1	0	10095	Gene_ID	H. sapiens	10095	H. sapiens	ARPC1B	actin related protein 2/3 complex subunit 1B	GO:0034314 Arp2/3 complex-mediated actin nucleation;GO:0045010 actin nucleation;GO:0043627 response to estrogen		Disease related genes; Predicted intracellular proteins	Cytosol;Vesicles (reliability'])	N-[2-(2-methyl-1H-indol-3-yl)ethyl]thiophene-2-carboxamide; (2S)-2-(3-bromophenyl)-3-(5-chloro-2-hydroxyphenyl)-1,3-thiazolidin-4-one	(M278)PID RAC1 PATHWAY; (M81)PID CDC42 PATHWAY; (M164)PID ERBB1 DOWNSTREAM PATHWAY		0	0	0	0	0	0	0	1	0	0	0	0	0	0	0	0	0	0	0	0	1
1632	Eci1	0	1	1632	Gene_ID	H. sapiens	1632	H. sapiens	ECI1	enoyl-CoA delta isomerase 1	GO:0006635 fatty acid beta-oxidation;GO:0019395 fatty acid oxidation;GO:0034440 lipid oxidation		Enzymes; Predicted intracellular proteins; ENZYME proteins:Isomerase	Mitochondria (reliability'])	Octanoyl-Coenzyme A; Benzamidine		(M5935)HALLMARK FATTY ACID METABOLISM; (M5936)HALLMARK OXIDATIVE PHOSPHORYLATION	0	0	0	0	0	0	0	0	0	0	1	0	0	0	0	0	0	0	0	0	1
384	Arg2	1	0	384	Gene_ID	H. sapiens	384	H. sapiens	ARG2	arginase 2	GO:0071606 chemokine (C-C motif) ligand 4 production;GO:0071643 regulation of chemokine (C-C motif) ligand 4 production;GO:0071644 negative regulation of chemokine (C-C motif) ligand 4 production		ENZYME proteins:Hydrolases; Cancer-related genes:Candidate cancer biomarkers; Predicted intracellular proteins; Enzymes	Mitochondria (reliability'])	Arginine; Ornithine; S-2-(Boronoethyl)-L-Cysteine		(M5934)HALLMARK XENOBIOTIC METABOLISM	0	0	1	0	0	0	1	0	0	0	0	0	0	0	1	1	0	0	1	0	1
51614	Ergic3	0	1	51614	Gene_ID	H. sapiens	51614	H. sapiens	ERGIC3	ERGIC and golgi 3	GO:0006890 retrograde vesicle-mediated transport, Golgi to ER;GO:0006888 ER to Golgi vesicle-mediated transport;GO:0048193 Golgi vesicle transport		Predicted intracellular proteins	Nucleoplasm (reliability'])			(M5910)HALLMARK PROTEIN SECRETION	0	0	0	0	0	0	0	0	0	0	0	0	0	0	0	0	0	0	0	0	1
101	Adam8	1	0	101	Gene_ID	H. sapiens	101	H. sapiens	ADAM8	ADAM metallopeptidase domain 8	GO:0072680 extracellular matrix-dependent thymocyte migration;GO:0072681 fibronectin-dependent thymocyte migration;GO:2000413 regulation of fibronectin-dependent thymocyte migration		CD markers; Predicted intracellular proteins			(M118)PID INTEGRIN A9B1 PATHWAY; (M3468)NABA ECM REGULATORS; (M5885)NABA MATRISOME ASSOCIATED	(M5953)HALLMARK KRAS SIGNALING UP	1	0	1	0	1	1	0	0	0	0	0	1	1	0	0	0	0	0	1	0	1
1347	Cox7a2	0	1	1347	Gene_ID	H. sapiens	1347	H. sapiens	COX7A2	cytochrome c oxidase subunit 7A2	GO:0097250 mitochondrial respiratory chain supercomplex assembly;GO:0002082 regulation of oxidative phosphorylation;GO:1903578 regulation of ATP metabolic process		Predicted intracellular proteins				(M5936)HALLMARK OXIDATIVE PHOSPHORYLATION	0	1	0	1	0	0	0	0	0	0	0	0	0	0	0	0	0	0	0	0	1
3303	Hspa1a	0	1	3303	Gene_ID	H. sapiens	3303	H. sapiens	HSPA1A	heat shock protein family A (Hsp70) member 1A	GO:1902380 positive regulation of endoribonuclease activity;GO:0070434 positive regulation of nucleotide-binding oligomerization domain containing 2 signaling pathway;GO:0070426 positive regulation of nucleotide-binding oligomerization domain containing signaling pathway		Predicted intracellular proteins	Nucleoplasm;Vesicles (reliability']); Additional: Cytosol			(M5921)HALLMARK COMPLEMENT	0	1	0	1	0	0	0	1	0	1	0	0	0	1	0	1	0	0	0	0	1
5339	Plec	0	1	5339	Gene_ID	H. sapiens	5339	H. sapiens	PLEC	plectin	GO:0031581 hemidesmosome assembly;GO:0045104 intermediate filament cytoskeleton organization;GO:0045103 intermediate filament-based process		Disease related genes; Cancer-related genes:Mutational cancer driver genes; Predicted intracellular proteins	Cytosol;Intermediate filaments (reliability']); Additional: Focal adhesion sites			(M5947)HALLMARK IL2 STAT5 SIGNALING	0	0	0	0	0	0	0	0	0	0	0	0	1	0	0	0	0	0	0	1	1
127281	Fam213b	1	0	127281	Gene_ID	H. sapiens	127281	H. sapiens	PRXL2B	peroxiredoxin like 2B	GO:0001516 prostaglandin biosynthetic process;GO:0046457 prostanoid biosynthetic process;GO:0006692 prostanoid metabolic process		ENZYME proteins:Oxidoreductases; Predicted intracellular proteins; Enzymes					0	0	0	0	0	0	0	0	0	0	1	0	0	0	0	0	0	0	0	0	1
10298	Pak4	1	0	10298	Gene_ID	H. sapiens	10298	H. sapiens	PAK4	p21 (RAC1) activated kinase 4	GO:2000352 negative regulation of endothelial cell apoptotic process;GO:1904036 negative regulation of epithelial cell apoptotic process;GO:2000351 regulation of endothelial cell apoptotic process	STE Ser/Thr protein kinase family	Predicted intracellular proteins; Enzymes; Kinases:STE Ser/Thr protein kinases; ENZYME proteins:Transferases; RAS pathway related proteins	Cell Junctions;Plasma membrane (reliability'])	Fostamatinib	(M16801)SIG REGULATION OF THE ACTIN CYTOSKELETON BY RHO GTPASES; (M5193)SIG CHEMOTAXIS; (M276)PID FGF PATHWAY	(M5923)HALLMARK PI3K AKT MTOR SIGNALING	0	0	0	0	1	0	0	0	0	1	0	0	0	0	0	0	0	0	0	0	1
25957	Pnisr	0	1	25957	Gene_ID	H. sapiens	25957	H. sapiens	PNISR	PNN interacting serine and arginine rich protein			Predicted intracellular proteins	Nuclear speckles (reliability']); Additional: Cytosol;Plasma membrane				0	0	0	0	0	0	0	0	0	0	0	0	0	0	0	0	0	0	0	0	1
84108	Pcgf6	1	0	84108	Gene_ID	H. sapiens	84108	H. sapiens	PCGF6	polycomb group ring finger 6	GO:0036353 histone H2A-K119 monoubiquitination;GO:0035518 histone H2A monoubiquitination;GO:0033522 histone H2A ubiquitination		Predicted intracellular proteins					0	0	0	0	0	0	0	0	0	0	0	0	0	0	0	0	0	0	0	0	1
7818	Dap3	0	1	7818	Gene_ID	H. sapiens	7818	H. sapiens	DAP3	death associated protein 3	GO:0070125 mitochondrial translational elongation;GO:0070126 mitochondrial translational termination;GO:0006415 translational termination		Ribosomal proteins; Predicted intracellular proteins	Mitochondria;Nucleoplasm (reliability'])		(M79)PID TRAIL PATHWAY	(M5902)HALLMARK APOPTOSIS	0	0	0	0	0	0	0	0	0	0	0	0	0	0	0	0	0	0	0	0	1
1345	Cox6c	1	0	1345	Gene_ID	H. sapiens	1345	H. sapiens	COX6C	cytochrome c oxidase subunit 6C	GO:0006123 mitochondrial electron transport, cytochrome c to oxygen;GO:0019646 aerobic electron transport chain;GO:0009060 aerobic respiration			Mitochondria (reliability'])	Cholic Acid; N-Formylmethionine		(M5907)HALLMARK ESTROGEN RESPONSE LATE; (M5936)HALLMARK OXIDATIVE PHOSPHORYLATION	0	1	0	1	0	0	1	0	0	0	0	0	0	0	0	0	0	0	0	0	1
6521	Slc4a1	0	1	6521	Gene_ID	H. sapiens	6521	H. sapiens	SLC4A1	solute carrier family 4 member 1 (Diego blood group)	GO:1904538 regulation of glycolytic process through fructose-6-phosphate;GO:1904539 negative regulation of glycolytic process through fructose-6-phosphate;GO:0035811 negative regulation of urine volume		CD markers; Predicted intracellular proteins; Disease related genes; Blood group antigen proteins; Transporters:Electrochemical Potential-driven transporters; Potential drug targets				(M5945)HALLMARK HEME METABOLISM	0	1	0	1	0	0	0	0	0	0	1	0	0	0	0	0	0	0	0	1	1
1983	Eif5	1	0	1983	Gene_ID	H. sapiens	1983	H. sapiens	EIF5	eukaryotic translation initiation factor 5	GO:0001731 formation of translation preinitiation complex;GO:0001732 formation of cytoplasmic translation initiation complex;GO:0002183 cytoplasmic translational initiation		Predicted intracellular proteins	Cytosol (reliability']); Additional: Plasma membrane			(M5941)HALLMARK UV RESPONSE UP	0	0	0	0	0	0	0	0	0	0	0	0	0	0	0	0	0	0	0	0	1
5473	Ppbp	1	0	5473	Gene_ID	H. sapiens	5473	H. sapiens	PPBP	pro-platelet basic protein	GO:0061844 antimicrobial humoral immune response mediated by antimicrobial peptide;GO:0051781 positive regulation of cell division;GO:0070098 chemokine-mediated signaling pathway		Predicted secreted proteins		Ethanesulfonic acid; Copper	(M5883)NABA SECRETED FACTORS; (M5885)NABA MATRISOME ASSOCIATED; (M5889)NABA MATRISOME	(M5953)HALLMARK KRAS SIGNALING UP	1	0	0	0	0	0	0	0	0	1	0	1	0	0	0	1	0	0	0	0	1
89857	Klhl6	1	0	89857	Gene_ID	H. sapiens	89857	H. sapiens	KLHL6	kelch like family member 6	GO:0002467 germinal center formation;GO:0050853 B cell receptor signaling pathway;GO:0050851 antigen receptor-mediated signaling pathway		Predicted intracellular proteins	Centriolar satellite (reliability']); Additional: Microtubules;Mitotic spindle;Plasma membrane				0	0	0	0	0	0	0	0	0	0	0	0	0	0	0	1	0	0	0	0	1
5213	Pfkm	1	0	5213	Gene_ID	H. sapiens	5213	H. sapiens	PFKM	phosphofructokinase, muscle	GO:0030388 fructose 1,6-bisphosphate metabolic process;GO:0006002 fructose 6-phosphate metabolic process;GO:0046716 muscle cell cellular homeostasis		Predicted intracellular proteins; Disease related genes; Enzymes; Potential drug targets; ENZYME proteins:Transferases	Endoplasmic reticulum (reliability'])		(M66)PID MYC ACTIV PATHWAY	(M5948)HALLMARK BILE ACID METABOLISM; (M5909)HALLMARK MYOGENESIS	0	1	0	1	0	0	0	0	0	0	1	0	0	0	0	0	0	0	0	0	1
284485	Riiad1	1	0	284485	Gene_ID	H. sapiens	284485	H. sapiens	RIIAD1	regulatory subunit of type II PKA R-subunit domain containing 1			Predicted intracellular proteins	Cytosol (reliability']); Additional: Nucleoplasm				0	0	0	0	0	0	0	0	0	0	0	0	0	0	0	0	0	0	0	0	1
51474	Lima1	1	0	51474	Gene_ID	H. sapiens	51474	H. sapiens	LIMA1	LIM domain and actin binding 1	GO:0030299 intestinal cholesterol absorption;GO:0098856 intestinal lipid absorption;GO:0044241 lipid digestion		Predicted intracellular proteins	Actin filaments;Plasma membrane (reliability']); Additional: Cytosol;Focal adhesion sites		(M232)PID ECADHERIN STABILIZATION PATHWAY	(M5915)HALLMARK APICAL JUNCTION	0	0	0	0	0	0	0	1	0	0	0	0	0	0	0	0	0	0	0	0	1
5095	Pcca	0	1	5095	Gene_ID	H. sapiens	5095	H. sapiens	PCCA	propionyl-CoA carboxylase subunit alpha	GO:0019626 short-chain fatty acid catabolic process;GO:0006768 biotin metabolic process;GO:0046459 short-chain fatty acid metabolic process		Predicted intracellular proteins; Disease related genes; ENZYME proteins:Ligase; Enzymes; Potential drug targets	Mitochondria (reliability'])	Biotin			0	0	0	1	0	0	0	0	0	0	1	0	0	0	0	0	0	0	0	0	1
2896	Grn	0	1	2896	Gene_ID	H. sapiens	2896	H. sapiens	GRN	granulin precursor	GO:1905673 positive regulation of lysosome organization;GO:0002265 astrocyte activation involved in immune response;GO:1905671 regulation of lysosome organization		Disease related genes; Predicted secreted proteins; Predicted intracellular proteins	Endoplasmic reticulum;Endosomes;Lysosomes (reliability'])				0	0	0	0	1	1	0	0	0	0	0	1	0	0	1	0	0	0	0	1	1
4627	Myh9	0	1	4627	Gene_ID	H. sapiens	4627	H. sapiens	MYH9	myosin heavy chain 9	GO:1903918 regulation of actin filament severing;GO:1903919 negative regulation of actin filament severing;GO:1900756 protein processing in phagocytic vesicle		Disease related genes; Cancer-related genes:Mutational cancer driver genes; Predicted intracellular proteins	Actin filaments;Plasma membrane (reliability']); Additional: Cytosol	Artenimol		(M5919)HALLMARK HEDGEHOG SIGNALING; (M5893)HALLMARK MITOTIC SPINDLE; (M5891)HALLMARK HYPOXIA	0	0	1	0	1	0	1	1	0	0	0	0	0	0	0	0	0	1	0	1	1
5534	Ppp3r1	0	1	5534	Gene_ID	H. sapiens	5534	H. sapiens	PPP3R1	protein phosphatase 3 regulatory subunit B, alpha	GO:1900739 regulation of protein insertion into mitochondrial membrane involved in apoptotic signaling pathway;GO:1900740 positive regulation of protein insertion into mitochondrial membrane involved in apoptotic signaling pathway;GO:0001844 protein insertion into mitochondrial membrane involved in apoptotic signaling pathway		Predicted intracellular proteins	Cytosol;Plasma membrane (reliability'])	Myristic acid; Voclosporin	(M235)PID TCR CALCIUM PATHWAY; (M290)PID IL12 STAT4 PATHWAY; (M113)PID NFAT 3PATHWAY	(M5902)HALLMARK APOPTOSIS	0	1	0	0	0	0	0	0	0	0	0	0	0	0	0	0	0	0	0	0	1
4582	Muc1	1	0	4582	Gene_ID	H. sapiens	4582	H. sapiens	MUC1	mucin 1, cell surface associated	GO:0090240 positive regulation of histone H4 acetylation;GO:0010944 negative regulation of transcription by competitive promoter binding;GO:0033629 negative regulation of cell adhesion mediated by integrin		CD markers; Predicted intracellular proteins; Disease related genes; Cancer-related genes:Candidate cancer biomarkers; Predicted secreted proteins	Plasma membrane (reliability'])	TG4010	(M5880)NABA ECM AFFILIATED; (M5885)NABA MATRISOME ASSOCIATED; (M5889)NABA MATRISOME	(M5947)HALLMARK IL2 STAT5 SIGNALING; (M5906)HALLMARK ESTROGEN RESPONSE EARLY	0	0	1	1	0	0	0	0	0	0	0	0	0	0	1	0	0	0	0	0	1
1063	Cenpf	0	1	1063	Gene_ID	H. sapiens	1063	H. sapiens	CENPF	centromere protein F	GO:0051382 kinetochore assembly;GO:0051383 kinetochore organization;GO:0021591 ventricular system development		Cancer-related genes:Candidate cancer biomarkers; Disease related genes; Predicted intracellular proteins	Nucleoplasm (reliability'])		(M176)PID FOXM1 PATHWAY	(M5893)HALLMARK MITOTIC SPINDLE; (M5901)HALLMARK G2M CHECKPOINT	0	0	0	0	0	0	0	0	0	0	0	0	0	0	0	0	0	1	0	0	1
11001	Slc27a2	0	1	11001	Gene_ID	H. sapiens	11001	H. sapiens	SLC27A2	solute carrier family 27 member 2	GO:0097089 methyl-branched fatty acid metabolic process;GO:0042760 very long-chain fatty acid catabolic process;GO:0001561 fatty acid alpha-oxidation		Transporters; ENZYME proteins:Ligase; Enzymes				(M5949)HALLMARK PEROXISOME; (M5948)HALLMARK BILE ACID METABOLISM; (M5906)HALLMARK ESTROGEN RESPONSE EARLY	0	0	0	0	0	0	0	0	0	0	1	0	0	0	0	0	0	0	0	0	1
4288	Mki67	0	1	4288	Gene_ID	H. sapiens	4288	H. sapiens	MKI67	marker of proliferation Ki-67	GO:0051983 regulation of chromosome segregation;GO:0007088 regulation of mitotic nuclear division;GO:0051783 regulation of nuclear division		Cancer-related genes:Candidate cancer biomarkers; Predicted intracellular proteins	Nucleoli;Nucleoplasm (reliability'])			(M5901)HALLMARK G2M CHECKPOINT; (M5925)HALLMARK E2F TARGETS	0	0	0	0	0	0	0	0	0	0	0	0	0	0	0	0	0	0	0	0	1
29126	Cd274	0	1	29126	Gene_ID	H. sapiens	29126	H. sapiens	CD274	CD274 molecule	GO:0002413 tolerance induction to tumor cell;GO:0002843 regulation of tolerance induction to tumor cell;GO:0002845 positive regulation of tolerance induction to tumor cell		CD markers; Cancer-related genes; FDA approved drug targets:Biotech drugs		Atezolizumab; Durvalumab; Avelumab		(M5913)HALLMARK INTERFERON GAMMA RESPONSE; (M5915)HALLMARK APICAL JUNCTION	0	0	1	0	0	1	0	0	0	1	0	0	0	0	1	1	0	0	0	0	1
57597	Bahcc1	0	1	57597	Gene_ID	H. sapiens	57597	H. sapiens	BAHCC1	BAH domain and coiled-coil containing 1			Predicted intracellular proteins	Nucleoli (reliability'])				0	0	0	0	0	0	0	0	0	0	0	0	0	0	0	0	0	0	0	0	1
6640	Snta1	0	1	6640	Gene_ID	H. sapiens	6640	H. sapiens	SNTA1	syntrophin alpha 1	GO:1902083 negative regulation of peptidyl-cysteine S-nitrosylation;GO:2000169 regulation of peptidyl-cysteine S-nitrosylation;GO:0017014 protein nitrosylation		Disease related genes; Predicted intracellular proteins			(M209)PID P38 GAMMA DELTA PATHWAY		0	0	0	0	0	0	1	0	0	0	0	0	0	0	0	0	0	0	0	0	1
51023	Mrps18c	0	1	51023	Gene_ID	H. sapiens	51023	H. sapiens	MRPS18C	mitochondrial ribosomal protein S18C	GO:0070125 mitochondrial translational elongation;GO:0070126 mitochondrial translational termination;GO:0006415 translational termination		Ribosomal proteins; Predicted intracellular proteins					0	0	0	0	0	0	0	0	0	0	0	0	0	0	0	0	0	0	0	0	1
6046	Brd2	1	0	6046	Gene_ID	H. sapiens	6046	H. sapiens	BRD2	bromodomain containing 2	GO:0001843 neural tube closure;GO:0060606 tube closure;GO:0014020 primary neural tube formation		Predicted intracellular proteins	Nuclear speckles (reliability'])		(M279)PID RB 1PATHWAY		0	0	0	0	0	0	0	0	0	0	0	0	0	0	0	0	0	0	0	0	1
203	Ak1	1	0	203	Gene_ID	H. sapiens	203	H. sapiens	AK1	adenylate kinase 1	GO:0006172 ADP biosynthetic process;GO:0009136 purine nucleoside diphosphate biosynthetic process;GO:0009180 purine ribonucleoside diphosphate biosynthetic process		Predicted intracellular proteins; Disease related genes; Enzymes; Potential drug targets; ENZYME proteins:Transferases	Cytosol (reliability'])	Bis(Adenosine)-5'-Pentaphosphate		(M5898)HALLMARK DNA REPAIR; (M5909)HALLMARK MYOGENESIS; (M5939)HALLMARK P53 PATHWAY	0	0	0	1	0	0	0	0	0	0	0	0	0	0	0	0	0	0	0	0	1
4301	Afdn	0	1	4301	Gene_ID	H. sapiens	4301	H. sapiens	AFDN	afadin, adherens junction formation factor	GO:2000049 positive regulation of cell-cell adhesion mediated by cadherin;GO:0090557 establishment of endothelial intestinal barrier;GO:0046931 pore complex assembly		Predicted intracellular proteins; Disease related genes; Cancer-related genes; RAS pathway related proteins	Cell Junctions;Plasma membrane (reliability']); Additional: Nucleoplasm	(5R)-2-sulfanyl-5-[4-(trifluoromethyl)benzyl]-1,3-thiazol-4(5H)-one	(M72)PID NECTIN PATHWAY; (M156)PID ECADHERIN NASCENT AJ PATHWAY; (M232)PID ECADHERIN STABILIZATION PATHWAY		0	0	1	0	0	0	0	0	0	0	0	0	0	0	0	0	0	0	0	0	1
100130015	Urah	0	1	100130015	Gene_ID	H. sapiens	100130015	H. sapiens	URAHP	urate (hydroxyiso-) hydrolase, pseudogene								0	0	0	0	0	0	0	0	0	0	0	0	0	0	0	0	0	0	0	0	1
84525	Hopx	1	0	84525	Gene_ID	H. sapiens	84525	H. sapiens	HOPX	HOP homeobox	GO:0001829 trophectodermal cell differentiation;GO:0051131 chaperone-mediated protein complex assembly;GO:0001825 blastocyst formation		Transcription factors:Helix-turn-helix domains; Predicted intracellular proteins	Nuclear bodies (reliability']); Additional: Cytosol			(M5947)HALLMARK IL2 STAT5 SIGNALING	0	0	0	0	0	0	0	0	0	0	0	0	0	0	0	0	0	0	0	0	1
2521	Fus	0	1	2521	Gene_ID	H. sapiens	2521	H. sapiens	FUS	FUS RNA binding protein	GO:1905168 positive regulation of double-strand break repair via homologous recombination;GO:2000781 positive regulation of double-strand break repair;GO:0045911 positive regulation of DNA recombination		Predicted intracellular proteins; Disease related genes; Cancer-related genes	Nucleoplasm (reliability'])			(M5922)HALLMARK UNFOLDED PROTEIN RESPONSE	0	0	0	0	0	0	0	0	0	0	0	0	0	0	0	0	1	0	0	0	1
345778	Mtx3	0	1	345778	Gene_ID	H. sapiens	345778	H. sapiens	MTX3	metaxin 3	GO:0007007 inner mitochondrial membrane organization;GO:0007006 mitochondrial membrane organization;GO:0007005 mitochondrion organization		Predicted intracellular proteins	Mitochondria (reliability'])				0	1	0	0	0	0	0	0	0	0	0	0	0	0	0	0	0	0	0	0	1
21	Abca3	1	0	21	Gene_ID	H. sapiens	21	H. sapiens	ABCA3	ATP binding cassette subfamily A member 3	GO:0051384 response to glucocorticoid;GO:0031960 response to corticosteroid;GO:0048545 response to steroid hormone		Potential drug targets; Disease related genes; Transporters:Primary Active Transporters	Cytosol;Nucleoplasm (reliability'])		(M200)PID ERA GENOMIC PATHWAY	(M5948)HALLMARK BILE ACID METABOLISM; (M5906)HALLMARK ESTROGEN RESPONSE EARLY; (M5907)HALLMARK ESTROGEN RESPONSE LATE	0	0	0	0	0	0	0	0	0	1	0	0	0	0	0	0	0	0	0	0	1
129607	Cmpk2	1	0	129607	Gene_ID	H. sapiens	129607	H. sapiens	CMPK2	cytidine/uridine monophosphate kinase 2	GO:0006227 dUDP biosynthetic process;GO:0009196 pyrimidine deoxyribonucleoside diphosphate metabolic process;GO:0009197 pyrimidine deoxyribonucleoside diphosphate biosynthetic process		ENZYME proteins:Transferases; Predicted intracellular proteins; Enzymes	Mitochondria (reliability'])			(M5911)HALLMARK INTERFERON ALPHA RESPONSE; (M5898)HALLMARK DNA REPAIR; (M5913)HALLMARK INTERFERON GAMMA RESPONSE	0	0	0	1	0	0	0	0	0	1	0	0	0	0	0	1	0	0	0	0	1
23082	Pprc1	0	1	23082	Gene_ID	H. sapiens	23082	H. sapiens	PPRC1	PPARG related coactivator 1	GO:0051091 positive regulation of DNA-binding transcription factor activity;GO:0051090 regulation of DNA-binding transcription factor activity;GO:0007005 mitochondrion organization		Predicted intracellular proteins	Nucleoplasm (reliability'])			(M5928)HALLMARK MYC TARGETS V2	0	1	0	0	0	0	0	0	0	0	0	0	0	0	0	0	0	0	0	0	1
8409	Uxt	0	1	8409	Gene_ID	H. sapiens	8409	H. sapiens	UXT	ubiquitously expressed prefoldin like chaperone	GO:0034643 establishment of mitochondrion localization, microtubule-mediated;GO:0047497 mitochondrion transport along microtubule;GO:0051654 establishment of mitochondrion localization		Predicted intracellular proteins	Centriolar satellite (reliability']); Additional: Nucleoplasm		(M40)PID E2F PATHWAY	(M5893)HALLMARK MITOTIC SPINDLE	0	0	0	0	0	0	0	0	0	0	0	0	0	0	0	0	0	0	0	0	1
10725	Nfat5	0	1	10725	Gene_ID	H. sapiens	10725	H. sapiens	NFAT5	nuclear factor of activated T cells 5	GO:1904996 positive regulation of leukocyte adhesion to vascular endothelial cell;GO:0070884 regulation of calcineurin-NFAT signaling cascade;GO:0106056 regulation of calcineurin-mediated signaling		Predicted intracellular proteins; Transcription factors:Immunoglobulin fold	Nucleoplasm (reliability']); Additional: Cytosol			(M5890)HALLMARK TNFA SIGNALING VIA NFKB	0	0	1	0	0	0	0	0	0	0	0	0	0	0	0	0	0	0	0	0	1
5026	P2rx5	0	1	5026	Gene_ID	H. sapiens	5026	H. sapiens	P2RX5	purinergic receptor P2X 5	GO:0035590 purinergic nucleotide receptor signaling pathway;GO:0035587 purinergic receptor signaling pathway;GO:0033198 response to ATP		Predicted intracellular proteins	Cytosol (reliability'])				0	0	0	0	0	0	0	0	0	0	0	0	0	0	0	0	0	0	0	1	1
1318	Slc31a2	1	0	1318	Gene_ID	H. sapiens	1318	H. sapiens	SLC31A2	solute carrier family 31 member 2	GO:1902311 regulation of copper ion transmembrane transport;GO:0035434 copper ion transmembrane transport;GO:0006878 cellular copper ion homeostasis		Transporters:Transporter channels and pores	Nuclear speckles (reliability']); Additional: Intermediate filaments;Plasma membrane			(M5932)HALLMARK INFLAMMATORY RESPONSE	0	0	0	0	0	0	0	0	0	0	0	0	0	0	0	0	0	0	0	0	1
2331	Fmod	1	0	2331	Gene_ID	H. sapiens	2331	H. sapiens	FMOD	fibromodulin	GO:0007181 transforming growth factor beta receptor complex assembly;GO:0042340 keratan sulfate catabolic process;GO:0018146 keratan sulfate biosynthetic process		Predicted secreted proteins			(M5882)NABA PROTEOGLYCANS; (M5884)NABA CORE MATRISOME; (M5889)NABA MATRISOME	(M5930)HALLMARK EPITHELIAL MESENCHYMAL TRANSITION	0	0	0	1	0	0	0	1	0	0	0	0	1	1	0	0	0	0	0	0	1
56098	Pcdhgc4	0	1	56098	Gene_ID	H. sapiens	56098	H. sapiens	PCDHGC4	protocadherin gamma subfamily C, 4	GO:0007156 homophilic cell adhesion via plasma membrane adhesion molecules;GO:0098742 cell-cell adhesion via plasma-membrane adhesion molecules;GO:0050808 synapse organization		Predicted intracellular proteins	Plasma membrane;Vesicles (reliability']); Additional: Cytosol;Nucleoplasm				0	0	0	0	0	0	0	0	0	0	0	0	0	0	0	0	0	0	0	0	1
9611	Ncor1	0	1	9611	Gene_ID	H. sapiens	9611	H. sapiens	NCOR1	nuclear receptor corepressor 1	GO:1903799 negative regulation of production of miRNAs involved in gene silencing by miRNA;GO:0045820 negative regulation of glycolytic process;GO:0045475 locomotor rhythm		Transcription factors:Helix-turn-helix domains; Cancer-related genes:Mutational cancer driver genes; Predicted intracellular proteins; Cancer-related genes:Mutated cancer genes	Nucleoplasm (reliability']); Additional: Cytosol		(M13)PID ERBB4 PATHWAY; (M288)PID HES HEY PATHWAY; (M17)PID NOTCH PATHWAY		0	1	0	1	0	0	0	0	1	1	1	0	0	0	0	0	0	0	0	0	1
27315	Pgap2	1	0	27315	Gene_ID	H. sapiens	27315	H. sapiens	PGAP2	post-GPI attachment to proteins 2	GO:0006506 GPI anchor biosynthetic process;GO:0006505 GPI anchor metabolic process;GO:0009247 glycolipid biosynthetic process		Transporters; Disease related genes; Predicted intracellular proteins; Potential drug targets	Microtubules (reliability'])				0	0	0	1	0	0	0	0	0	0	0	0	0	0	0	0	0	0	0	0	1
8660	Irs2	1	0	8660	Gene_ID	H. sapiens	8660	H. sapiens	IRS2	insulin receptor substrate 2	GO:0010748 negative regulation of plasma membrane long-chain fatty acid transport;GO:0010746 regulation of plasma membrane long-chain fatty acid transport;GO:2000192 negative regulation of fatty acid transport		Cancer-related genes:Mutational cancer driver genes; Predicted intracellular proteins	Cytosol (reliability']); Additional: Aggresome		(M1718)SIG IL4RECEPTOR IN B LYPHOCYTES; (M125)PID IGF1 PATHWAY; (M233)PID EPO PATHWAY	(M5890)HALLMARK TNFA SIGNALING VIA NFKB; (M5891)HALLMARK HYPOXIA; (M5937)HALLMARK GLYCOLYSIS	0	1	1	0	0	1	0	0	1	0	1	1	0	0	0	0	0	0	1	0	1
6271	S100a1	0	1	6271	Gene_ID	H. sapiens	6271	H. sapiens	S100A1	S100 calcium binding protein A1	GO:1901387 positive regulation of voltage-gated calcium channel activity;GO:0051000 positive regulation of nitric-oxide synthase activity;GO:0032770 positive regulation of monooxygenase activity		Cancer-related genes:Candidate cancer biomarkers; Predicted intracellular proteins; Transporters:Accessory Factors Involved in Transport		Olopatadine	(M5883)NABA SECRETED FACTORS; (M5885)NABA MATRISOME ASSOCIATED; (M5889)NABA MATRISOME	(M5946)HALLMARK COAGULATION; (M5947)HALLMARK IL2 STAT5 SIGNALING	0	0	0	0	1	0	0	0	0	0	0	0	0	0	0	0	0	0	0	0	1
7407	Vars	0	1	7407	Gene_ID	H. sapiens	7407	H. sapiens	VARS1	valyl-tRNA synthetase 1	GO:0006438 valyl-tRNA aminoacylation;GO:0106074 aminoacyl-tRNA metabolism involved in translational fidelity;GO:0006450 regulation of translational fidelity		Predicted intracellular proteins; ENZYME proteins:Ligase; Enzymes	Cytosol (reliability'])	Valine			0	0	0	0	0	0	0	0	0	0	0	0	0	0	0	0	0	0	0	0	1
81689	Isca1	0	1	81689	Gene_ID	H. sapiens	81689	H. sapiens	ISCA1	iron-sulfur cluster assembly 1	GO:0097428 protein maturation by iron-sulfur cluster transfer;GO:0016226 iron-sulfur cluster assembly;GO:0031163 metallo-sulfur cluster assembly		Disease related genes; Predicted intracellular proteins				(M5936)HALLMARK OXIDATIVE PHOSPHORYLATION; (M5945)HALLMARK HEME METABOLISM	0	0	0	1	0	0	0	0	0	0	0	0	0	0	0	0	0	0	0	0	1
124540	Msi2	0	1	124540	Gene_ID	H. sapiens	124540	H. sapiens	MSI2	musashi RNA binding protein 2	GO:0048864 stem cell development;GO:0048863 stem cell differentiation;GO:0048468 cell development		Predicted intracellular proteins; Disease related genes; Cancer-related genes	Cytosol (reliability'])				0	0	0	0	0	0	0	0	0	0	0	0	0	0	0	0	0	0	0	0	1
339	Apobec1	0	1	339	Gene_ID	H. sapiens	339	H. sapiens	APOBEC1	apolipoprotein B mRNA editing enzyme catalytic subunit 1	GO:0090365 regulation of mRNA modification;GO:0090366 positive regulation of mRNA modification;GO:0090310 negative regulation of methylation-dependent chromatin silencing		ENZYME proteins:Hydrolases; Predicted intracellular proteins; Enzymes		Zinc chloride; Zinc sulfate, unspecified form			0	0	0	0	0	0	0	0	1	0	0	0	0	0	0	0	1	0	0	0	1
55719	Fam178a	0	1	55719	Gene_ID	H. sapiens	55719	H. sapiens	SLF2	SMC5-SMC6 complex localization factor 2	GO:1990166 protein localization to site of double-strand break;GO:0034093 positive regulation of maintenance of sister chromatid cohesion;GO:0034184 positive regulation of maintenance of mitotic sister chromatid cohesion		Predicted intracellular proteins	Nucleoplasm;Vesicles (reliability'])				0	0	0	0	0	0	0	0	0	0	0	0	0	0	0	0	0	0	0	0	1
140885	Sirpa	1	0	140885	Gene_ID	H. sapiens	140885	H. sapiens	SIRPA	signal regulatory protein alpha	GO:1903720 negative regulation of I-kappaB phosphorylation;GO:0071641 negative regulation of macrophage inflammatory protein 1 alpha production;GO:0071650 negative regulation of chemokine (C-C motif) ligand 5 production		CD markers				(M5915)HALLMARK APICAL JUNCTION	1	0	1	0	0	0	0	0	0	1	0	1	0	0	0	1	1	0	0	0	1
8864	Per2	1	0	8864	Gene_ID	H. sapiens	8864	H. sapiens	PER2	period circadian regulator 2	GO:0051941 regulation of amino acid uptake involved in synaptic transmission;GO:0051946 regulation of glutamate uptake involved in transmission of nerve impulse;GO:0051933 amino acid neurotransmitter reuptake		Disease related genes; Predicted intracellular proteins			(M95)PID CIRCADIAN PATHWAY		0	1	0	0	0	0	0	0	0	0	1	0	0	0	0	0	0	0	1	0	1
57466	Scaf4	0	1	57466	Gene_ID	H. sapiens	57466	H. sapiens	SCAF4	SR-related CTD associated factor 4	GO:0060567 negative regulation of DNA-templated transcription, termination;GO:0120191 negative regulation of termination of RNA polymerase II transcription;GO:2000805 negative regulation of termination of RNA polymerase II transcription, poly(A)-coupled		Predicted intracellular proteins	Nucleoplasm (reliability'])			(M5938)HALLMARK REACTIVE OXYGEN SPECIES PATHWAY	0	0	0	0	0	0	0	0	0	0	0	0	0	0	0	0	0	0	0	0	1
55847	Cisd1	0	1	55847	Gene_ID	H. sapiens	55847	H. sapiens	CISD1	CDGSH iron sulfur domain 1	GO:0043457 regulation of cellular respiration;GO:0043467 regulation of generation of precursor metabolites and energy;GO:0045333 cellular respiration			Mitochondria (reliability'])				0	1	0	0	0	0	0	0	0	0	0	0	0	0	0	0	0	0	0	0	1
2793	Gngt2	0	1	2793	Gene_ID	H. sapiens	2793	H. sapiens	GNGT2	G protein subunit gamma transducin 2	GO:0007602 phototransduction;GO:0009583 detection of light stimulus;GO:0009581 detection of external stimulus		Transporters:Accessory Factors Involved in Transport; Predicted intracellular proteins; RAS pathway related proteins			(M117)PID CONE PATHWAY	(M5921)HALLMARK COMPLEMENT	0	1	0	0	0	0	0	0	0	0	0	1	0	0	0	0	0	0	0	0	1
6723	Srm	1	0	6723	Gene_ID	H. sapiens	6723	H. sapiens	SRM	spermidine synthase	GO:0008295 spermidine biosynthetic process;GO:0008216 spermidine metabolic process;GO:0006596 polyamine biosynthetic process		ENZYME proteins:Transferases; Predicted intracellular proteins; Enzymes	Nucleoplasm (reliability']); Additional: Cytosol			(M5928)HALLMARK MYC TARGETS V2; (M5926)HALLMARK MYC TARGETS V1	0	0	0	0	0	0	0	0	0	0	0	0	0	0	0	0	0	0	0	0	1
2941	Gsta4	1	0	2941	Gene_ID	H. sapiens	2941	H. sapiens	GSTA4	glutathione S-transferase alpha 4	GO:1901685 glutathione derivative metabolic process;GO:1901687 glutathione derivative biosynthetic process;GO:0006749 glutathione metabolic process		ENZYME proteins:Transferases; Predicted intracellular proteins; Enzymes		Glutathione			0	0	0	1	0	0	0	0	0	0	0	0	0	0	0	0	0	0	0	0	1
10949	Hnrnpa0	0	1	10949	Gene_ID	H. sapiens	10949	H. sapiens	HNRNPA0	heterogeneous nuclear ribonucleoprotein A0	GO:0070935 3'-UTR-mediated mRNA stabilization;GO:0048255 mRNA stabilization;GO:0043489 RNA stabilization		Predicted intracellular proteins	Nucleoplasm (reliability'])				0	0	0	0	0	0	0	0	0	0	0	0	0	0	0	1	0	0	0	0	1
5589	Prkcsh	0	1	5589	Gene_ID	H. sapiens	5589	H. sapiens	PRKCSH	protein kinase C substrate 80K-H	GO:0006491 N-glycan processing;GO:0001889 liver development;GO:0061008 hepaticobiliary system development		Disease related genes; Predicted intracellular proteins	Endoplasmic reticulum (reliability'])				0	0	0	0	0	0	0	0	0	0	0	0	0	0	0	0	0	0	0	0	1
2314	Flii	0	1	2314	Gene_ID	H. sapiens	2314	H. sapiens	FLII	FLII actin remodeling protein	GO:0051014 actin filament severing;GO:0051016 barbed-end actin filament capping;GO:0051693 actin filament capping		Predicted intracellular proteins	Centriolar satellite;Cytosol;Nucleoplasm (reliability'])			(M5909)HALLMARK MYOGENESIS	0	0	0	0	0	0	0	1	0	0	0	0	0	0	0	0	0	1	0	0	1
328	Apex1	0	1	328	Gene_ID	H. sapiens	328	H. sapiens	APEX1	apurinic/apyrimidinic endodeoxyribonuclease 1	GO:0097698 telomere maintenance via base-excision repair;GO:0006286 base-excision repair, base-free sugar-phosphate removal;GO:0098502 DNA dephosphorylation		Predicted intracellular proteins; FDA approved drug targets:Small molecule drugs; ENZYME proteins:Lyases; Cancer-related genes:Candidate cancer biomarkers; Enzymes	Nucleoplasm (reliability'])	Lucanthone	(M44)PID HIF2PATHWAY	(M5935)HALLMARK FATTY ACID METABOLISM; (M5926)HALLMARK MYC TARGETS V1	0	1	0	0	0	0	0	0	1	1	0	0	0	0	0	0	1	0	0	0	1
2952	Gstt1	1	0	2952	Gene_ID	H. sapiens	2952	H. sapiens	GSTT1	glutathione S-transferase theta 1	GO:1901685 glutathione derivative metabolic process;GO:1901687 glutathione derivative biosynthetic process;GO:0006749 glutathione metabolic process				Glutathione			0	0	0	1	0	0	0	0	0	0	0	0	0	0	0	0	0	0	0	0	1
6439	Sftpb	1	0	6439	Gene_ID	H. sapiens	6439	H. sapiens	SFTPB	surfactant protein B	GO:0007585 respiratory gaseous exchange;GO:0006665 sphingolipid metabolic process;GO:0006643 membrane lipid metabolic process		Disease related genes; Predicted secreted proteins; Predicted intracellular proteins			(M5880)NABA ECM AFFILIATED; (M5885)NABA MATRISOME ASSOCIATED; (M5889)NABA MATRISOME		0	0	0	0	0	0	0	0	0	0	0	0	0	0	0	0	0	0	0	0	1
23286	Wwc1	1	0	23286	Gene_ID	H. sapiens	23286	H. sapiens	WWC1	WW and C2 domain containing 1	GO:0035331 negative regulation of hippo signaling;GO:0007221 positive regulation of transcription of Notch receptor target;GO:0035330 regulation of hippo signaling		Predicted intracellular proteins	Golgi apparatus (reliability'])			(M5906)HALLMARK ESTROGEN RESPONSE EARLY	0	0	0	0	0	0	0	0	0	0	0	0	0	0	0	0	0	0	0	0	1
858	Cav2	0	1	858	Gene_ID	H. sapiens	858	H. sapiens	CAV2	caveolin 2	GO:0044789 modulation by host of viral release from host cell;GO:0044791 positive regulation by host of viral release from host cell;GO:0070836 caveola assembly		Predicted intracellular proteins	Vesicles (reliability'])		(M240)PID SYNDECAN 2 PATHWAY	(M5910)HALLMARK PROTEIN SECRETION	0	1	0	0	0	1	0	0	1	0	0	0	1	1	0	0	0	1	0	0	1
3945	Ldhb	0	1	3945	Gene_ID	H. sapiens	3945	H. sapiens	LDHB	lactate dehydrogenase B	GO:0006090 pyruvate metabolic process;GO:0005975 carbohydrate metabolic process;GO:0032787 monocarboxylic acid metabolic process		ENZYME proteins:Oxidoreductases; Predicted intracellular proteins; FDA approved drug targets:Small molecule drugs; Disease related genes; Enzymes	Cytosol (reliability'])	NADH; 4-Hydroxy-1,2,5-oxadiazole-3-carboxylic acid; Oxamic Acid; Stiripentol; Artenimol		(M5936)HALLMARK OXIDATIVE PHOSPHORYLATION; (M5939)HALLMARK P53 PATHWAY	0	1	0	1	0	0	0	0	0	0	1	0	0	0	0	0	0	0	0	0	1
2954	Gstz1	0	1	2954	Gene_ID	H. sapiens	2954	H. sapiens	GSTZ1	glutathione S-transferase zeta 1	GO:0006572 tyrosine catabolic process;GO:0010510 regulation of acetyl-CoA biosynthetic process from pyruvate;GO:0050812 regulation of acyl-CoA biosynthetic process		Predicted intracellular proteins; ENZYME proteins:Isomerase; Disease related genes; Enzymes; Potential drug targets; ENZYME proteins:Transferases	Cytosol (reliability']); Additional: Nucleoplasm	Glutathione; 1,4-Dithiothreitol; Dichloroacetic acid; Glycerin		(M5935)HALLMARK FATTY ACID METABOLISM	0	1	0	1	0	0	0	0	0	0	1	0	0	0	0	0	0	0	0	0	1
6498	Skil	1	0	6498	Gene_ID	H. sapiens	6498	H. sapiens	SKIL	SKI like proto-oncogene	GO:1902231 positive regulation of intrinsic apoptotic signaling pathway in response to DNA damage;GO:1902043 positive regulation of extrinsic apoptotic signaling pathway via death domain receptors;GO:0070306 lens fiber cell differentiation		Predicted intracellular proteins	Cytosol;Nucleoplasm (reliability'])		(M286)PID TGFBR PATHWAY; (M2)PID SMAD2 3NUCLEAR PATHWAY	(M5896)HALLMARK TGF BETA SIGNALING; (M5956)HALLMARK KRAS SIGNALING DN	0	0	0	0	0	0	0	0	0	0	0	0	0	1	0	0	0	0	0	0	1
4694	Ndufa1	1	0	4694	Gene_ID	H. sapiens	4694	H. sapiens	NDUFA1	NADH:ubiquinone oxidoreductase subunit A1	GO:0006120 mitochondrial electron transport, NADH to ubiquinone;GO:0010257 NADH dehydrogenase complex assembly;GO:0032981 mitochondrial respiratory chain complex I assembly		Disease related genes	Mitochondria (reliability']); Additional: Cytosol	NADH		(M5936)HALLMARK OXIDATIVE PHOSPHORYLATION	0	1	0	1	0	0	0	0	0	0	0	0	0	0	0	0	0	0	0	0	1
29802	Vpreb3	1	0	29802	Gene_ID	H. sapiens	29802	H. sapiens	VPREB3	V-set pre-B cell surrogate light chain 3	GO:0002377 immunoglobulin production;GO:0002440 production of molecular mediator of immune response;GO:0050900 leukocyte migration		Predicted intracellular proteins					0	0	0	0	0	0	0	0	0	0	0	1	0	0	0	0	0	0	0	0	1
9686	Vgll4	1	0	9686	Gene_ID	H. sapiens	9686	H. sapiens	VGLL4	vestigial like family member 4	GO:0035331 negative regulation of hippo signaling;GO:0035330 regulation of hippo signaling;GO:0060044 negative regulation of cardiac muscle cell proliferation		Predicted intracellular proteins	Nucleoli fibrillar center (reliability']); Additional: Nucleoplasm				0	0	0	0	0	0	0	0	0	0	0	0	0	0	0	0	0	1	0	0	1
22992	Kdm2a	0	1	22992	Gene_ID	H. sapiens	22992	H. sapiens	KDM2A	lysine demethylase 2A	GO:0010944 negative regulation of transcription by competitive promoter binding;GO:0070544 histone H3-K36 demethylation;GO:0070076 histone lysine demethylation		ENZYME proteins:Oxidoreductases; Transcription factors:Zinc-coordinating DNA-binding domains; Predicted intracellular proteins; Enzymes	Nucleoplasm (reliability'])				0	0	0	0	0	0	0	0	0	0	0	0	0	0	0	0	0	0	0	0	1
4897	Nrcam	1	0	4897	Gene_ID	H. sapiens	4897	H. sapiens	NRCAM	neuronal cell adhesion molecule	GO:0045162 clustering of voltage-gated sodium channels;GO:0019227 neuronal action potential propagation;GO:0098870 action potential propagation		Predicted intracellular proteins	Nucleoplasm (reliability']); Additional: Plasma membrane;Vesicles			(M5919)HALLMARK HEDGEHOG SIGNALING	0	0	0	0	1	0	0	0	0	0	0	1	0	0	0	0	0	0	0	0	1
55829	Vimp	1	0	55829	Gene_ID	H. sapiens	55829	H. sapiens	SELENOS	selenoprotein S	GO:0080164 regulation of nitric oxide metabolic process;GO:0051771 negative regulation of nitric-oxide synthase biosynthetic process;GO:0002865 negative regulation of acute inflammatory response to antigenic stimulus			Endoplasmic reticulum (reliability'])			(M5938)HALLMARK REACTIVE OXYGEN SPECIES PATHWAY; (M5932)HALLMARK INFLAMMATORY RESPONSE	0	1	0	0	0	0	0	0	1	1	0	0	0	0	1	1	0	0	0	0	1
26577	Pcolce2	1	0	26577	Gene_ID	H. sapiens	26577	H. sapiens	PCOLCE2	procollagen C-endopeptidase enhancer 2	GO:1990823 response to leukemia inhibitory factor;GO:1990830 cellular response to leukemia inhibitory factor;GO:0010952 positive regulation of peptidase activity		Predicted secreted proteins	Cytosol;Nucleoplasm (reliability'])		(M3008)NABA ECM GLYCOPROTEINS; (M5884)NABA CORE MATRISOME; (M5889)NABA MATRISOME	(M5930)HALLMARK EPITHELIAL MESENCHYMAL TRANSITION	0	0	0	0	0	0	0	0	0	0	0	0	1	0	0	0	0	0	0	0	1
80339	Pnpla3	0	1	80339	Gene_ID	H. sapiens	80339	H. sapiens	PNPLA3	patatin like phospholipase domain containing 3	GO:0036153 triglyceride acyl-chain remodeling;GO:0036155 acylglycerol acyl-chain remodeling;GO:0034389 lipid droplet organization		Predicted intracellular proteins; Disease related genes; ENZYME proteins:Hydrolases; Enzymes; Potential drug targets	Nucleoli (reliability']); Additional: Cytosol;Mitochondria				0	0	0	1	0	0	0	0	0	0	1	0	0	0	0	0	0	0	0	0	1
91179	Scarf2	0	1	91179	Gene_ID	H. sapiens	91179	H. sapiens	SCARF2	scavenger receptor class F member 2	GO:0007157 heterophilic cell-cell adhesion via plasma membrane cell adhesion molecules;GO:0098742 cell-cell adhesion via plasma-membrane adhesion molecules;GO:0006897 endocytosis		Disease related genes	Nucleoplasm (reliability']); Additional: Cytosol;Nuclear bodies				0	0	0	0	0	0	0	0	0	0	0	0	0	0	0	0	0	0	0	0	1
23041	Mon2	1	0	23041	Gene_ID	H. sapiens	23041	H. sapiens	MON2	MON2 homolog, regulator of endosome-to-Golgi trafficking	GO:0006895 Golgi to endosome transport;GO:0006892 post-Golgi vesicle-mediated transport;GO:0016482 cytosolic transport		Predicted intracellular proteins	Nucleoli fibrillar center;Nucleoplasm (reliability'])			(M5910)HALLMARK PROTEIN SECRETION	0	0	0	0	0	0	0	0	0	0	0	0	0	0	0	0	0	0	0	0	1
219285	Samd9l	0	1	219285	Gene_ID	H. sapiens	219285	H. sapiens	SAMD9L	sterile alpha motif domain containing 9 like			Disease related genes; Predicted intracellular proteins	Cytosol (reliability'])			(M5911)HALLMARK INTERFERON ALPHA RESPONSE; (M5913)HALLMARK INTERFERON GAMMA RESPONSE	0	0	0	0	0	0	0	0	0	0	0	0	0	0	0	0	0	0	0	0	1
122553	Trappc6b	1	0	122553	Gene_ID	H. sapiens	122553	H. sapiens	TRAPPC6B	trafficking protein particle complex 6B	GO:0048207 vesicle targeting, rough ER to cis-Golgi;GO:0048208 COPII vesicle coating;GO:0006901 vesicle coating		Predicted intracellular proteins	Endoplasmic reticulum (reliability'])	S-palmitoyl-L-cysteine			0	0	0	0	0	0	0	0	0	0	0	0	0	0	0	0	0	0	0	0	1
84376	Hook3	0	1	84376	Gene_ID	H. sapiens	84376	H. sapiens	HOOK3	hook microtubule tethering protein 3	GO:0022027 interkinetic nuclear migration;GO:0034454 microtubule anchoring at centrosome;GO:0072393 microtubule anchoring at microtubule organizing center		Predicted intracellular proteins; Cancer-related genes	Centriolar satellite (reliability']); Additional: Cytosol;Golgi apparatus			(M5893)HALLMARK MITOTIC SPINDLE	0	0	0	0	0	0	0	1	0	0	0	0	0	0	0	0	0	0	0	0	1
4291	Mlf1	1	0	4291	Gene_ID	H. sapiens	4291	H. sapiens	MLF1	myeloid leukemia factor 1	GO:0002318 myeloid progenitor cell differentiation;GO:0002244 hematopoietic progenitor cell differentiation;GO:0007050 cell cycle arrest		Predicted intracellular proteins; Disease related genes; Cancer-related genes	Nucleoplasm (reliability']); Additional: Cytosol			(M5951)HALLMARK SPERMATOGENESIS	0	0	0	0	0	0	0	0	0	0	0	0	0	0	0	0	0	0	0	0	1
3601	Il15ra	1	0	3601	Gene_ID	H. sapiens	3601	H. sapiens	IL15RA	interleukin 15 receptor subunit alpha	GO:0035723 interleukin-15-mediated signaling pathway;GO:0071350 cellular response to interleukin-15;GO:0070672 response to interleukin-15		CD markers; Predicted secreted proteins; Predicted intracellular proteins				(M5897)HALLMARK IL6 JAK STAT3 SIGNALING; (M5890)HALLMARK TNFA SIGNALING VIA NFKB; (M5913)HALLMARK INTERFERON GAMMA RESPONSE	0	0	0	0	0	0	0	0	0	0	0	1	0	0	0	0	0	0	0	0	1
4708	Ndufb2	0	1	4708	Gene_ID	H. sapiens	4708	H. sapiens	NDUFB2	NADH:ubiquinone oxidoreductase subunit B2	GO:0006120 mitochondrial electron transport, NADH to ubiquinone;GO:0010257 NADH dehydrogenase complex assembly;GO:0032981 mitochondrial respiratory chain complex I assembly		Predicted intracellular proteins	Mitochondria;Nucleoplasm (reliability'])	NADH		(M5936)HALLMARK OXIDATIVE PHOSPHORYLATION	0	1	0	1	0	0	0	0	0	0	0	0	0	0	0	0	0	0	0	0	1
539	Atp5o	0	1	539	Gene_ID	H. sapiens	539	H. sapiens	ATP5PO	ATP synthase peripheral stalk subunit OSCP	GO:0042776 mitochondrial ATP synthesis coupled proton transport;GO:0015985 energy coupled proton transport, down electrochemical gradient;GO:0015986 ATP synthesis coupled proton transport		Predicted intracellular proteins	Mitochondria (reliability'])	Artenimol		(M5905)HALLMARK ADIPOGENESIS; (M5936)HALLMARK OXIDATIVE PHOSPHORYLATION	0	1	0	1	0	0	0	0	0	0	0	0	0	0	0	0	0	0	0	0	1
10417	Spon2	1	0	10417	Gene_ID	H. sapiens	10417	H. sapiens	SPON2	spondin 2	GO:0043152 induction of bacterial agglutination;GO:0060907 positive regulation of macrophage cytokine production;GO:0008228 opsonization		Predicted secreted proteins; Predicted intracellular proteins	Vesicles (reliability'])		(M169)PID INTEGRIN2 PATHWAY; (M3008)NABA ECM GLYCOPROTEINS; (M5884)NABA CORE MATRISOME		1	0	0	0	0	0	0	0	0	1	0	0	0	0	0	1	0	0	0	0	1
1284	Col4a2	0	1	1284	Gene_ID	H. sapiens	1284	H. sapiens	COL4A2	collagen type IV alpha 2 chain	GO:0038063 collagen-activated tyrosine kinase receptor signaling pathway;GO:0038065 collagen-activated signaling pathway;GO:0035987 endodermal cell differentiation		Cancer-related genes:Candidate cancer biomarkers; Disease related genes; Predicted secreted proteins; Predicted intracellular proteins	Vesicles (reliability'])		(M5887)NABA BASEMENT MEMBRANES; (M3005)NABA COLLAGENS; (M5884)NABA CORE MATRISOME	(M5909)HALLMARK MYOGENESIS; (M5921)HALLMARK COMPLEMENT; (M5930)HALLMARK EPITHELIAL MESENCHYMAL TRANSITION	0	0	0	0	1	0	0	0	0	0	0	0	1	1	0	0	0	0	0	0	1
9859	Cep170	0	1	9859	Gene_ID	H. sapiens	9859	H. sapiens	CEP170	centrosomal protein 170			Predicted intracellular proteins	Centrosome (reliability']); Additional: Cytosol;Mitotic spindle				0	0	0	0	0	0	0	0	0	0	0	0	0	0	0	0	0	0	0	0	1
135114	Hint3	0	1	135114	Gene_ID	H. sapiens	135114	H. sapiens	HINT3	histidine triad nucleotide binding protein 3			Predicted intracellular proteins	Mitochondria;Nucleoli (reliability']); Additional: Cytosol				0	0	0	0	0	0	0	0	0	0	0	0	0	0	0	0	0	0	0	0	1
2879	Gpx4	1	0	2879	Gene_ID	H. sapiens	2879	H. sapiens	GPX4	glutathione peroxidase 4	GO:0097707 ferroptosis;GO:0110075 regulation of ferroptosis;GO:0110076 negative regulation of ferroptosis		ENZYME proteins:Oxidoreductases; Predicted intracellular proteins; Disease related genes; Enzymes; Potential drug targets	Mitochondria;Nucleoplasm (reliability'])	Glutathione		(M5938)HALLMARK REACTIVE OXYGEN SPECIES PATHWAY; (M5898)HALLMARK DNA REPAIR; (M5902)HALLMARK APOPTOSIS	0	0	0	1	0	0	0	0	0	0	1	0	0	0	0	0	0	0	0	0	1
960	Cd44	1	0	960	Gene_ID	H. sapiens	960	H. sapiens	CD44	CD44 molecule (Indian blood group)	GO:1900623 regulation of monocyte aggregation;GO:1900625 positive regulation of monocyte aggregation;GO:0070487 monocyte aggregation		CD markers; Predicted intracellular proteins; FDA approved drug targets:Small molecule drugs; Blood group antigen proteins; Cancer-related genes:Candidate cancer biomarkers; Predicted secreted proteins	Plasma membrane (reliability']); Additional: Golgi apparatus	Bivatuzumab; Hyaluronic acid	(M11736)SA MMP CYTOKINE CONNECTION; (M63)PID AVB3 OPN PATHWAY	(M5897)HALLMARK IL6 JAK STAT3 SIGNALING; (M5902)HALLMARK APOPTOSIS; (M5947)HALLMARK IL2 STAT5 SIGNALING	1	0	1	0	0	0	0	0	0	0	0	1	1	1	0	0	0	0	0	1	1
8785	Matn4	1	0	8785	Gene_ID	H. sapiens	8785	H. sapiens	MATN4	matrilin 4	GO:0030198 extracellular matrix organization;GO:0043062 extracellular structure organization;GO:0016043 cellular component organization		Predicted secreted proteins			(M3008)NABA ECM GLYCOPROTEINS; (M5884)NABA CORE MATRISOME; (M5889)NABA MATRISOME		0	0	0	0	0	0	0	0	0	0	0	0	1	0	0	0	0	0	0	0	1
8502	Pkp4	1	0	8502	Gene_ID	H. sapiens	8502	H. sapiens	PKP4	plakophilin 4	GO:0032467 positive regulation of cytokinesis;GO:0051781 positive regulation of cell division;GO:0032465 regulation of cytokinesis		Predicted intracellular proteins	Cell Junctions (reliability']); Additional: Plasma membrane				0	0	1	0	0	0	0	0	0	0	0	0	0	0	0	0	0	0	0	0	1
255783	Inafm1	1	0	255783	Gene_ID	H. sapiens	255783	H. sapiens	INAFM1	InaF motif containing 1			Predicted intracellular proteins					0	0	0	0	0	0	0	0	0	0	0	0	0	0	0	0	0	0	0	0	1
55143	Cdca8	1	0	55143	Gene_ID	H. sapiens	55143	H. sapiens	CDCA8	cell division cycle associated 8	GO:0007080 mitotic metaphase plate congression;GO:0051310 metaphase plate congression;GO:0050000 chromosome localization		Predicted intracellular proteins	Nucleoli (reliability']); Additional: Cytokinetic bridge;Nucleoplasm		(M14)PID AURORA B PATHWAY	(M5925)HALLMARK E2F TARGETS	0	0	0	0	0	0	0	0	0	0	0	0	0	0	0	0	0	0	0	0	1
55705	Ipo9	0	1	55705	Gene_ID	H. sapiens	55705	H. sapiens	IPO9	importin 9	GO:0006606 protein import into nucleus;GO:0051170 import into nucleus;GO:0017038 protein import		Predicted intracellular proteins; Transporters:Transporter channels and pores	Cytosol (reliability']); Additional: Vesicles				0	0	0	0	0	0	0	0	0	0	0	0	0	0	0	0	0	0	0	0	1
84299	Mien1	0	1	84299	Gene_ID	H. sapiens	84299	H. sapiens	MIEN1	migration and invasion enhancer 1	GO:0010269 response to selenium ion;GO:0051491 positive regulation of filopodium assembly;GO:0051489 regulation of filopodium assembly		Predicted intracellular proteins					0	0	0	0	0	1	0	0	0	0	0	0	0	0	0	0	1	0	0	0	1
9725	Tmem63a	1	0	9725	Gene_ID	H. sapiens	9725	H. sapiens	TMEM63A	transmembrane protein 63A	GO:0043312 neutrophil degranulation;GO:0002283 neutrophil activation involved in immune response;GO:0002446 neutrophil mediated immunity		Predicted intracellular proteins	Centriolar satellite;Vesicles (reliability'])				1	0	0	0	0	0	0	0	0	0	0	0	0	0	0	0	0	0	0	0	1
10528	Nop56	1	0	10528	Gene_ID	H. sapiens	10528	H. sapiens	NOP56	NOP56 ribonucleoprotein	GO:0006364 rRNA processing;GO:0016072 rRNA metabolic process;GO:0042254 ribosome biogenesis		Disease related genes; Predicted intracellular proteins	Nucleoli fibrillar center (reliability'])			(M5928)HALLMARK MYC TARGETS V2; (M5922)HALLMARK UNFOLDED PROTEIN RESPONSE; (M5925)HALLMARK E2F TARGETS	0	0	0	0	0	0	0	0	0	0	0	0	0	0	0	0	0	0	0	0	1
51084	Cryl1	0	1	51084	Gene_ID	H. sapiens	51084	H. sapiens	CRYL1	crystallin lambda 1	GO:0006064 glucuronate catabolic process;GO:0019640 glucuronate catabolic process to xylulose 5-phosphate;GO:0051167 xylulose 5-phosphate metabolic process		ENZYME proteins:Oxidoreductases; Predicted intracellular proteins; Enzymes	Nucleoli;Nucleoplasm (reliability']); Additional: Golgi apparatus;Plasma membrane				0	0	0	1	0	0	0	0	0	0	1	0	0	0	0	0	0	0	0	0	1
963	Cd53	1	0	963	Gene_ID	H. sapiens	963	H. sapiens	CD53	CD53 molecule	GO:1901741 positive regulation of myoblast fusion;GO:1901739 regulation of myoblast fusion;GO:0060143 positive regulation of syncytium formation by plasma membrane fusion		CD markers; Transporters:Accessory Factors Involved in Transport					1	0	0	0	0	0	0	0	0	0	0	0	0	0	0	0	0	1	0	0	1
5159	Pdgfrb	0	1	5159	Gene_ID	H. sapiens	5159	H. sapiens	PDGFRB	platelet derived growth factor receptor beta	GO:0060981 cell migration involved in coronary angiogenesis;GO:0106096 response to ceramide;GO:0072262 metanephric glomerular mesangial cell proliferation involved in metanephros development	Tyr protein kinase family	CD markers; Predicted intracellular proteins; FDA approved drug targets:Small molecule drugs; Disease related genes; FDA approved drug targets:Biotech drugs; Cancer-related genes:Candidate cancer biomarkers; Enzymes; Kinases:Tyr protein kinases; ENZYME proteins:Transferases; RAS pathway related proteins	Vesicles (reliability']); Additional: Golgi apparatus	Becaplermin; Sorafenib; Imatinib; Dasatinib; Sunitinib; XL999; XL820; Pazopanib; Midostaurin; Regorafenib; Nintedanib; Polaprezinc; Trapidil; Foreskin fibroblast (neonatal); Fostamatinib; Erdafitinib; Pexidartinib; Ripretinib	(M103)PID S1P S1P1 PATHWAY; (M55)PID S1P S1P3 PATHWAY; (M72)PID NECTIN PATHWAY	(M5942)HALLMARK UV RESPONSE DN; (M5902)HALLMARK APOPTOSIS; (M5930)HALLMARK EPITHELIAL MESENCHYMAL TRANSITION	0	0	0	1	1	1	0	1	0	0	0	1	0	1	0	0	1	1	0	1	1
6500	Skp1a	0	1	6500	Gene_ID	H. sapiens	6500	H. sapiens	SKP1	S-phase kinase associated protein 1	GO:0010265 SCF complex assembly;GO:1904668 positive regulation of ubiquitin protein ligase activity;GO:0035518 histone H2A monoubiquitination		Predicted intracellular proteins	Nucleoplasm (reliability']); Additional: Cytosol	1-naphthaleneacetic acid; (2S)-2-(1H-indol-3-yl)hexanoic acid; (2S)-2-(1H-indol-3-yl)pentanoic acid; (2S)-8-[(tert-butoxycarbonyl)amino]-2-(1H-indol-3-yl)octanoic acid; Indoleacetic acid	(M31)PID BETA CATENIN DEG PATHWAY; (M17)PID NOTCH PATHWAY; (M223)PID BETA CATENIN NUC PATHWAY	(M5903)HALLMARK NOTCH SIGNALING	0	0	0	0	0	0	0	0	0	0	0	0	0	0	0	1	0	0	0	0	1
488	Atp2a2	1	0	488	Gene_ID	H. sapiens	488	H. sapiens	ATP2A2	ATPase sarcoplasmic/endoplasmic reticulum Ca2+ transporting 2	GO:0032470 positive regulation of endoplasmic reticulum calcium ion concentration;GO:1903515 calcium ion transport from cytosol to endoplasmic reticulum;GO:1903233 regulation of calcium ion-dependent exocytosis of neurotransmitter		Predicted intracellular proteins; Disease related genes; ENZYME proteins:Hydrolases; Enzymes; Potential drug targets; Transporters:Primary Active Transporters		Istaroxime		(M5924)HALLMARK MTORC1 SIGNALING; (M5932)HALLMARK INFLAMMATORY RESPONSE; (M5934)HALLMARK XENOBIOTIC METABOLISM	1	1	0	0	0	0	1	1	0	0	0	0	0	0	0	1	0	1	1	0	1
373156	Gstk1	0	1	373156	Gene_ID	H. sapiens	373156	H. sapiens	GSTK1	glutathione S-transferase kappa 1	GO:1901685 glutathione derivative metabolic process;GO:1901687 glutathione derivative biosynthetic process;GO:0006749 glutathione metabolic process		ENZYME proteins:Transferases; Predicted intracellular proteins; Enzymes	Peroxisomes (reliability'])	Glutathione; GLUTATHIONE SULFINATE		(M5949)HALLMARK PEROXISOME; (M5948)HALLMARK BILE ACID METABOLISM	0	0	0	1	0	0	0	0	0	0	0	0	0	0	0	0	0	0	0	0	1
79812	Mmrn2	1	0	79812	Gene_ID	H. sapiens	79812	H. sapiens	MMRN2	multimerin 2	GO:0030948 negative regulation of vascular endothelial growth factor receptor signaling pathway;GO:0030947 regulation of vascular endothelial growth factor receptor signaling pathway;GO:0090051 negative regulation of cell migration involved in sprouting angiogenesis		Predicted secreted proteins; Predicted intracellular proteins	Vesicles (reliability'])		(M3008)NABA ECM GLYCOPROTEINS; (M5884)NABA CORE MATRISOME; (M5889)NABA MATRISOME		0	0	0	0	1	0	0	0	0	0	0	0	0	1	0	0	0	0	0	0	1
9610	Rin1	0	1	9610	Gene_ID	H. sapiens	9610	H. sapiens	RIN1	Ras and Rab interactor 1	GO:0031914 negative regulation of synaptic plasticity;GO:0008306 associative learning;GO:0007613 memory		Predicted intracellular proteins; RAS pathway related proteins	Nuclear membrane (reliability']); Additional: Nucleoplasm		(M269)PID RAS PATHWAY; (M164)PID ERBB1 DOWNSTREAM PATHWAY		0	0	0	0	0	0	0	0	0	0	0	0	0	0	0	0	0	0	0	0	1
5902	Ranbp1	1	0	5902	Gene_ID	H. sapiens	5902	H. sapiens	RANBP1	RAN binding protein 1	GO:0046604 positive regulation of mitotic centrosome separation;GO:0046602 regulation of mitotic centrosome separation;GO:0046607 positive regulation of centrosome cycle		Predicted intracellular proteins	Cytosol (reliability'])	Copper; Phenethyl Isothiocyanate	(M40)PID E2F PATHWAY	(M5925)HALLMARK E2F TARGETS; (M5926)HALLMARK MYC TARGETS V1	0	0	0	0	0	0	0	1	0	0	0	0	0	0	0	0	0	0	0	0	1
6497	Ski	0	1	6497	Gene_ID	H. sapiens	6497	H. sapiens	SKI	SKI proto-oncogene	GO:0043585 nose morphogenesis;GO:0010626 negative regulation of Schwann cell proliferation;GO:0010624 regulation of Schwann cell proliferation		Disease related genes; Predicted intracellular proteins	Nuclear bodies;Nucleoplasm (reliability'])		(M181)PID BMP PATHWAY; (M2)PID SMAD2 3NUCLEAR PATHWAY; (M195)PID CMYB PATHWAY	(M5896)HALLMARK TGF BETA SIGNALING	0	0	0	0	0	0	0	0	0	0	0	0	0	1	0	0	0	1	0	0	1
5149	Pde6h	0	1	5149	Gene_ID	H. sapiens	5149	H. sapiens	PDE6H	phosphodiesterase 6H	GO:0045745 positive regulation of G protein-coupled receptor signaling pathway;GO:0045742 positive regulation of epidermal growth factor receptor signaling pathway;GO:1901186 positive regulation of ERBB signaling pathway		Predicted intracellular proteins; Disease related genes; ENZYME proteins:Hydrolases; Enzymes; Potential drug targets	Vesicles (reliability'])	Sildenafil; Vardenafil	(M117)PID CONE PATHWAY		0	0	0	0	0	0	0	0	0	0	0	0	0	0	0	0	0	0	0	0	1
51512	Gtse1	1	0	51512	Gene_ID	H. sapiens	51512	H. sapiens	GTSE1	G2 and S-phase expressed 1	GO:0046827 positive regulation of protein export from nucleus;GO:0046825 regulation of protein export from nucleus;GO:0006977 DNA damage response, signal transduction by p53 class mediator resulting in cell cycle arrest		Predicted intracellular proteins	Centrosome (reliability']); Additional: Plasma membrane				0	0	0	0	0	1	0	0	0	0	0	0	0	0	0	0	0	0	1	0	1
6648	Sod2	1	0	6648	Gene_ID	H. sapiens	6648	H. sapiens	SOD2	superoxide dismutase 2	GO:0001306 age-dependent response to oxidative stress;GO:0001315 age-dependent response to reactive oxygen species;GO:0007571 age-dependent general metabolic decline		Predicted intracellular proteins	Mitochondria (reliability'])	Benzylsulfonic acid; 3-Fluoro-L-tyrosine	(M136)PID FOXO PATHWAY	(M5938)HALLMARK REACTIVE OXYGEN SPECIES PATHWAY; (M5949)HALLMARK PEROXISOME; (M5941)HALLMARK UV RESPONSE UP	0	1	0	0	1	1	0	0	0	0	0	0	0	0	0	0	1	1	0	0	1
22875	Enpp4	1	0	22875	Gene_ID	H. sapiens	22875	H. sapiens	ENPP4	ectonucleotide pyrophosphatase/phosphodiesterase 4	GO:0006152 purine nucleoside catabolic process;GO:0046130 purine ribonucleoside catabolic process;GO:0042454 ribonucleoside catabolic process		ENZYME proteins:Hydrolases; Enzymes					1	0	0	1	0	0	0	0	0	0	0	0	0	0	0	0	0	0	0	1	1
221092	Hnrnpul2	1	0	221092	Gene_ID	H. sapiens	221092	H. sapiens	HNRNPUL2	heterogeneous nuclear ribonucleoprotein U like 2	GO:0008150 biological_process		Predicted intracellular proteins	Nucleoplasm (reliability'])				0	0	0	0	0	0	0	0	0	0	0	0	0	0	0	0	0	0	0	0	1
5187	Per1	1	0	5187	Gene_ID	H. sapiens	5187	H. sapiens	PER1	period circadian regulator 1	GO:0097167 circadian regulation of translation;GO:2000323 negative regulation of glucocorticoid receptor signaling pathway;GO:2000322 regulation of glucocorticoid receptor signaling pathway		Predicted intracellular proteins; Cancer-related genes	Cytosol (reliability']); Additional: Nucleoplasm		(M95)PID CIRCADIAN PATHWAY	(M5890)HALLMARK TNFA SIGNALING VIA NFKB	0	0	0	0	0	0	0	0	1	1	0	0	0	0	0	0	0	0	0	0	1
5203	Pfdn4	0	1	5203	Gene_ID	H. sapiens	5203	H. sapiens	PFDN4	prefoldin subunit 4	GO:0006457 protein folding;GO:0009987 cellular process;GO:0008150 biological_process		Predicted intracellular proteins					0	0	0	0	0	0	0	0	0	0	0	0	0	0	0	0	0	0	0	0	1
23095	Kif1b	0	1	23095	Gene_ID	H. sapiens	23095	H. sapiens	KIF1B	kinesin family member 1B	GO:1904647 response to rotenone;GO:1990049 retrograde neuronal dense core vesicle transport;GO:1990048 anterograde neuronal dense core vesicle transport		Disease related genes; Predicted intracellular proteins				(M5910)HALLMARK PROTEIN SECRETION; (M5893)HALLMARK MITOTIC SPINDLE; (M5932)HALLMARK INFLAMMATORY RESPONSE	0	0	0	0	0	0	0	0	0	0	0	0	0	1	0	0	0	0	0	0	1
285973	Atg9b	0	1	285973	Gene_ID	H. sapiens	285973	H. sapiens	ATG9B	autophagy related 9B	GO:0044805 late nucleophagy;GO:0034497 protein localization to phagophore assembly site;GO:0044804 autophagy of nucleus		Transporters					0	1	0	0	0	0	0	0	0	0	0	0	0	0	0	0	0	0	0	0	1
3155	Hmgcl	1	0	3155	Gene_ID	H. sapiens	3155	H. sapiens	HMGCL	3-hydroxy-3-methylglutaryl-CoA lyase	GO:0006552 leucine catabolic process;GO:0006551 leucine metabolic process;GO:0046951 ketone body biosynthetic process		Predicted intracellular proteins; Disease related genes; ENZYME proteins:Lyases; Enzymes; Potential drug targets		3-hydroxyglutaric acid		(M5949)HALLMARK PEROXISOME; (M5935)HALLMARK FATTY ACID METABOLISM	0	1	0	1	0	0	0	0	0	0	1	0	0	0	0	0	0	0	0	0	1
56270	Wdr45b	1	0	56270	Gene_ID	H. sapiens	56270	H. sapiens	WDR45B	WD repeat domain 45B	GO:0034497 protein localization to phagophore assembly site;GO:0044804 autophagy of nucleus;GO:0000422 autophagy of mitochondrion		Predicted intracellular proteins	Golgi apparatus;Nucleoplasm (reliability']); Additional: Cytosol				0	0	0	0	0	0	0	0	0	0	0	0	0	0	0	0	0	0	0	0	1
151742	Ppm1l	1	0	151742	Gene_ID	H. sapiens	151742	H. sapiens	PPM1L	protein phosphatase, Mg2+/Mn2+ dependent 1L	GO:0030148 sphingolipid biosynthetic process;GO:0046467 membrane lipid biosynthetic process;GO:0006665 sphingolipid metabolic process		ENZYME proteins:Hydrolases; Predicted intracellular proteins; Enzymes	Cytosol (reliability']); Additional: Nucleoplasm				0	0	0	0	0	0	0	0	0	0	1	0	0	1	0	0	0	0	0	0	1
8613	Plpp3	1	0	8613	Gene_ID	H. sapiens	8613	H. sapiens	PLPP3	phospholipid phosphatase 3	GO:0044328 canonical Wnt signaling pathway involved in positive regulation of endothelial cell migration;GO:0044329 canonical Wnt signaling pathway involved in positive regulation of cell-cell adhesion;GO:0044330 canonical Wnt signaling pathway involved in positive regulation of wound healing		ENZYME proteins:Hydrolases; Enzymes	Golgi apparatus (reliability'])			(M5942)HALLMARK UV RESPONSE DN; (M5890)HALLMARK TNFA SIGNALING VIA NFKB	0	0	1	0	0	1	0	0	0	0	1	0	0	0	0	0	0	0	0	1	1
6502	Skp2	1	0	6502	Gene_ID	H. sapiens	6502	H. sapiens	SKP2	S-phase kinase associated protein 2	GO:0071460 cellular response to cell-matrix adhesion;GO:0033148 positive regulation of intracellular estrogen receptor signaling pathway;GO:1902916 positive regulation of protein polyubiquitination		Cancer-related genes:Candidate cancer biomarkers; Predicted intracellular proteins	Cytosol;Nucleoplasm (reliability'])		(M139)PID MYC PATHWAY; (M176)PID FOXM1 PATHWAY; (M136)PID FOXO PATHWAY	(M5895)HALLMARK WNT BETA CATENIN SIGNALING	0	0	0	0	0	0	0	0	1	1	0	0	0	0	0	0	0	0	0	0	1
1384	Crat	0	1	1384	Gene_ID	H. sapiens	1384	H. sapiens	CRAT	carnitine O-acetyltransferase	GO:0019254 carnitine metabolic process, CoA-linked;GO:0009437 carnitine metabolic process;GO:0051791 medium-chain fatty acid metabolic process		Transporters; ENZYME proteins:Transferases; Predicted intracellular proteins; Enzymes	Nuclear membrane;Nucleoplasm (reliability'])	Levocarnitine; Coenzyme A; (3-Carboxy-2-(R)-Hydroxy-Propyl)-Trimethyl-Ammonium		(M5949)HALLMARK PEROXISOME; (M5935)HALLMARK FATTY ACID METABOLISM; (M5905)HALLMARK ADIPOGENESIS	0	0	0	0	0	0	0	0	0	0	1	0	0	0	0	0	0	0	0	0	1
64116	Slc39a8	1	0	64116	Gene_ID	H. sapiens	64116	H. sapiens	SLC39A8	solute carrier family 39 member 8	GO:0030026 cellular manganese ion homeostasis;GO:0097080 plasma membrane selenite transport;GO:1990540 mitochondrial manganese ion transmembrane transport		Potential drug targets; Disease related genes; Transporters:Electrochemical Potential-driven transporters				(M5947)HALLMARK IL2 STAT5 SIGNALING	0	0	1	1	0	0	0	0	0	0	0	0	1	0	0	0	0	0	0	0	1
51203	Nusap1	1	0	51203	Gene_ID	H. sapiens	51203	H. sapiens	NUSAP1	nucleolar and spindle associated protein 1	GO:0007076 mitotic chromosome condensation;GO:0040001 establishment of mitotic spindle localization;GO:0051293 establishment of spindle localization		Predicted intracellular proteins	Nucleoplasm (reliability']); Additional: Nucleoli fibrillar center			(M5893)HALLMARK MITOTIC SPINDLE; (M5901)HALLMARK G2M CHECKPOINT	0	0	0	0	0	0	0	0	0	0	0	0	0	0	0	0	0	0	0	0	1
29842	Tfcp2l1	1	0	29842	Gene_ID	H. sapiens	29842	H. sapiens	TFCP2L1	transcription factor CP2 like 1	GO:0007028 cytoplasm organization;GO:0002070 epithelial cell maturation;GO:0008340 determination of adult lifespan		Predicted intracellular proteins; Transcription factors:Immunoglobulin fold	Nucleoli fibrillar center (reliability']); Additional: Mitochondria			(M5948)HALLMARK BILE ACID METABOLISM; (M5956)HALLMARK KRAS SIGNALING DN	0	0	0	0	0	0	0	0	0	0	0	0	0	0	0	0	0	0	0	0	1
58485	Trappc1	0	1	58485	Gene_ID	H. sapiens	58485	H. sapiens	TRAPPC1	trafficking protein particle complex 1	GO:0048207 vesicle targeting, rough ER to cis-Golgi;GO:0048208 COPII vesicle coating;GO:0006901 vesicle coating		Predicted intracellular proteins		S-palmitoyl-L-cysteine			0	0	0	0	0	0	0	0	0	0	0	0	0	0	0	0	0	0	0	0	1
23543	Rbfox2	1	0	23543	Gene_ID	H. sapiens	23543	H. sapiens	RBFOX2	RNA binding fox-1 homolog 2	GO:0021942 radial glia guided migration of Purkinje cell;GO:0010724 regulation of definitive erythrocyte differentiation;GO:0060318 definitive erythrocyte differentiation		Predicted intracellular proteins	Nucleoplasm (reliability']); Additional: Cytosol				0	0	0	0	0	0	0	0	1	1	0	0	0	1	0	0	0	0	0	0	1
2180	Acsl1	1	0	2180	Gene_ID	H. sapiens	2180	H. sapiens	ACSL1	acyl-CoA synthetase long chain family member 1	GO:0034201 response to oleic acid;GO:0033211 adiponectin-activated signaling pathway;GO:0044539 long-chain fatty acid import		Predicted intracellular proteins; ENZYME proteins:Ligase; Enzymes	Nucleoplasm (reliability']); Additional: Mitochondria	Adenosine phosphate; ATP		(M5949)HALLMARK PEROXISOME; (M5948)HALLMARK BILE ACID METABOLISM; (M5935)HALLMARK FATTY ACID METABOLISM	0	1	0	1	0	0	0	0	1	1	1	0	0	0	0	0	0	0	0	0	1
865	Cbfb	1	0	865	Gene_ID	H. sapiens	865	H. sapiens	CBFB	core-binding factor subunit beta	GO:0043378 positive regulation of CD8-positive, alpha-beta T cell differentiation;GO:0043376 regulation of CD8-positive, alpha-beta T cell differentiation;GO:2001187 positive regulation of CD8-positive, alpha-beta T cell activation		Disease related genes; Cancer-related genes:Mutational cancer driver genes; Predicted intracellular proteins; Cancer-related genes:Mutated cancer genes	Cytosol;Nucleoplasm (reliability'])		(M166)PID ATF2 PATHWAY; (M167)PID AP1 PATHWAY; (M2)PID SMAD2 3NUCLEAR PATHWAY		0	0	1	0	0	0	0	0	1	1	0	0	0	0	1	0	0	0	0	0	1
5372	Pmm1	1	0	5372	Gene_ID	H. sapiens	5372	H. sapiens	PMM1	phosphomannomutase 1	GO:0009298 GDP-mannose biosynthetic process;GO:0019673 GDP-mannose metabolic process;GO:0006013 mannose metabolic process		Enzymes; Predicted intracellular proteins; ENZYME proteins:Isomerase	Cytosol (reliability'])			(M5934)HALLMARK XENOBIOTIC METABOLISM; (M5939)HALLMARK P53 PATHWAY	0	0	0	1	0	0	0	0	0	0	0	0	0	0	0	0	0	0	0	0	1
1340	Cox6b1	1	0	1340	Gene_ID	H. sapiens	1340	H. sapiens	COX6B1	cytochrome c oxidase subunit 6B1	GO:0006123 mitochondrial electron transport, cytochrome c to oxygen;GO:0019646 aerobic electron transport chain;GO:0021762 substantia nigra development		Disease related genes; Predicted intracellular proteins	Mitochondria (reliability'])	Cholic Acid; N-Formylmethionine		(M5936)HALLMARK OXIDATIVE PHOSPHORYLATION	0	1	0	1	0	0	1	0	0	0	0	0	0	0	0	0	0	0	0	0	1
2195	Fat1	0	1	2195	Gene_ID	H. sapiens	2195	H. sapiens	FAT1	FAT atypical cadherin 1	GO:0003382 epithelial cell morphogenesis;GO:0045197 establishment or maintenance of epithelial cell apical/basal polarity;GO:0035088 establishment or maintenance of apical/basal cell polarity		Predicted intracellular proteins; Cancer-related genes:Mutated cancer genes					0	0	0	0	0	0	0	1	0	0	0	0	0	0	0	0	0	0	0	0	1
9771	Rapgef5	1	0	9771	Gene_ID	H. sapiens	9771	H. sapiens	RAPGEF5	Rap guanine nucleotide exchange factor 5	GO:0007264 small GTPase mediated signal transduction;GO:0007399 nervous system development;GO:0035556 intracellular signal transduction		Predicted intracellular proteins; RAS pathway related proteins	Nucleoplasm (reliability']); Additional: Nuclear bodies			(M5893)HALLMARK MITOTIC SPINDLE	0	0	0	0	0	0	0	0	0	0	0	0	0	0	0	0	0	0	0	0	1
84134	Tomm40l	0	1	84134	Gene_ID	H. sapiens	84134	H. sapiens	TOMM40L	translocase of outer mitochondrial membrane 40 like	GO:0030150 protein import into mitochondrial matrix;GO:0044743 protein transmembrane import into intracellular organelle;GO:0065002 intracellular protein transmembrane transport		Predicted intracellular proteins					0	1	0	0	0	0	0	0	0	0	0	0	0	0	0	0	0	0	0	0	1
2224	Fdps	1	0	2224	Gene_ID	H. sapiens	2224	H. sapiens	FDPS	farnesyl diphosphate synthase	GO:0033383 geranyl diphosphate metabolic process;GO:0033384 geranyl diphosphate biosynthetic process;GO:0045337 farnesyl diphosphate biosynthetic process		Predicted intracellular proteins; FDA approved drug targets:Small molecule drugs; Disease related genes; Enzymes; ENZYME proteins:Transferases	Cytosol (reliability']); Additional: Nucleoplasm	Pamidronic acid; Zoledronic acid; Alendronic acid; Ibandronate; Risedronic acid; Dimethylallyl Diphosphate; Isopentyl Pyrophosphate; Geranyl Diphosphate; ISOPENTENYL PYROPHOSPHATE; Incadronic acid; Minodronic acid; Farnesyl diphosphate; Geranylgeranyl diphosphate		(M5892)HALLMARK CHOLESTEROL HOMEOSTASIS; (M5949)HALLMARK PEROXISOME; (M5909)HALLMARK MYOGENESIS	0	0	0	1	0	0	0	0	0	0	1	0	0	0	0	0	0	0	0	0	1
100820829	Myzap	1	0	100820829	Gene_ID	H. sapiens	100820829	H. sapiens	MYZAP	myocardial zonula adherens protein	GO:0035556 intracellular signal transduction;GO:0007165 signal transduction;GO:0023052 signaling		Predicted intracellular proteins					0	0	0	0	0	0	0	0	0	0	0	0	0	0	0	0	0	0	0	0	1
23772	Csf2rb2	1	0	23772	Gene_ID	H. sapiens	23772	H. sapiens	CSF2RBP1	CSF2RB pseudogene 1								0	0	0	0	0	0	0	0	0	0	0	0	0	0	0	0	0	0	0	0	1
55731	Fam222b	1	0	55731	Gene_ID	H. sapiens	55731	H. sapiens	FAM222B	family with sequence similarity 222 member B			Predicted intracellular proteins	Nucleoplasm (reliability'])				0	0	0	0	0	0	0	0	0	0	0	0	0	0	0	0	0	0	0	0	1
6925	Tcf4	0	1	6925	Gene_ID	H. sapiens	6925	H. sapiens	TCF4	transcription factor 4	GO:0065004 protein-DNA complex assembly;GO:0071824 protein-DNA complex subunit organization;GO:0045666 positive regulation of neuron differentiation		Transcription factors:Basic domains; Disease related genes; Predicted intracellular proteins	Cytosol;Nucleoplasm (reliability'])		(M58)PID AR PATHWAY; (M223)PID BETA CATENIN NUC PATHWAY		0	0	0	0	0	0	0	0	0	0	0	0	0	0	0	0	0	0	0	0	1
3547	Igsf1	1	0	3547	Gene_ID	H. sapiens	3547	H. sapiens	IGSF1	immunoglobulin superfamily member 1	GO:0032926 negative regulation of activin receptor signaling pathway;GO:0032925 regulation of activin receptor signaling pathway;GO:0032924 activin receptor signaling pathway		Disease related genes; Predicted intracellular proteins	Cytosol (reliability'])			(M5907)HALLMARK ESTROGEN RESPONSE LATE	0	0	0	0	0	0	0	0	0	0	0	0	0	1	0	0	0	0	0	0	1
57585	Cramp1l	0	1	57585	Gene_ID	H. sapiens	57585	H. sapiens	CRAMP1	cramped chromatin regulator homolog 1			Transcription factors:Helix-turn-helix domains; Predicted intracellular proteins	Nucleoplasm (reliability']); Additional: Cytosol;Nucleoli				0	0	0	0	0	0	0	0	0	0	0	0	0	0	0	0	0	0	0	0	1
282809	Poc1b	1	0	282809	Gene_ID	H. sapiens	282809	H. sapiens	POC1B	POC1 centriolar protein B	GO:0001895 retina homeostasis;GO:0001894 tissue homeostasis;GO:0060271 cilium assembly		Disease related genes; Predicted intracellular proteins					0	0	0	0	0	0	0	0	0	0	0	0	0	0	0	0	0	0	0	0	1
158471	Prune2	0	1	158471	Gene_ID	H. sapiens	158471	H. sapiens	PRUNE2	prune homolog 2 with BCH domain	GO:0006798 polyphosphate catabolic process;GO:0006797 polyphosphate metabolic process;GO:0043436 oxoacid metabolic process		Predicted intracellular proteins					0	0	0	0	0	0	0	0	0	0	0	0	0	0	0	0	0	0	0	0	1
2919	Cxcl1	0	1	2919	Gene_ID	H. sapiens	2919	H. sapiens	CXCL1	C-X-C motif chemokine ligand 1	GO:0061844 antimicrobial humoral immune response mediated by antimicrobial peptide;GO:0070098 chemokine-mediated signaling pathway;GO:1990868 response to chemokine		Cancer-related genes:Candidate cancer biomarkers; Predicted secreted proteins			(M196)PID IL23 PATHWAY; (M5883)NABA SECRETED FACTORS; (M5885)NABA MATRISOME ASSOCIATED	(M5897)HALLMARK IL6 JAK STAT3 SIGNALING; (M5890)HALLMARK TNFA SIGNALING VIA NFKB; (M5921)HALLMARK COMPLEMENT	0	0	0	0	0	0	0	1	0	1	0	1	0	0	0	1	0	0	0	0	1
8607	Ruvbl1	1	0	8607	Gene_ID	H. sapiens	8607	H. sapiens	RUVBL1	RuvB like AAA ATPase 1	GO:0000492 box C/D snoRNP assembly;GO:0000491 small nucleolar ribonucleoprotein complex assembly;GO:1904874 positive regulation of telomerase RNA localization to Cajal body		ENZYME proteins:Hydrolases; Predicted intracellular proteins; Enzymes	Cytosol;Nucleoplasm (reliability'])		(M139)PID MYC PATHWAY; (M71)PID ILK PATHWAY; (M66)PID MYC ACTIV PATHWAY		0	0	0	0	0	0	0	0	0	0	0	0	0	0	0	0	0	0	0	0	1
1281	Col3a1	1	0	1281	Gene_ID	H. sapiens	1281	H. sapiens	COL3A1	collagen type III alpha 1 chain	GO:0060414 aorta smooth muscle tissue morphogenesis;GO:2001223 negative regulation of neuron migration;GO:0048745 smooth muscle tissue development		Disease related genes; Predicted secreted proteins; Predicted intracellular proteins	Endoplasmic reticulum (reliability'])	Collagenase clostridium histolyticum	(M3005)NABA COLLAGENS; (M198)PID SYNDECAN 1 PATHWAY; (M8)PID ENDOTHELIN PATHWAY	(M5944)HALLMARK ANGIOGENESIS; (M5942)HALLMARK UV RESPONSE DN; (M5909)HALLMARK MYOGENESIS	0	0	0	0	1	0	1	1	1	0	0	0	1	1	1	0	0	1	0	1	1
203190	Lgi3	1	0	203190	Gene_ID	H. sapiens	203190	H. sapiens	LGI3	leucine rich repeat LGI family member 3	GO:0017157 regulation of exocytosis;GO:0060627 regulation of vesicle-mediated transport;GO:1903530 regulation of secretion by cell		Predicted secreted proteins; Predicted intracellular proteins	Cytosol (reliability'])		(M3008)NABA ECM GLYCOPROTEINS; (M5884)NABA CORE MATRISOME; (M5889)NABA MATRISOME		0	0	0	0	0	0	0	0	0	0	0	0	0	0	0	0	0	0	1	0	1
4778	Nfe2	1	0	4778	Gene_ID	H. sapiens	4778	H. sapiens	NFE2	nuclear factor, erythroid 2	GO:0006337 nucleosome disassembly;GO:0031498 chromatin disassembly;GO:0032986 protein-DNA complex disassembly		Transcription factors:Basic domains; Predicted intracellular proteins	Actin filaments;Nucleoplasm (reliability'])			(M5945)HALLMARK HEME METABOLISM	0	0	0	0	0	0	0	0	0	0	0	0	0	0	0	0	0	0	0	1	1
26262	Tspan17	0	1	26262	Gene_ID	H. sapiens	26262	H. sapiens	TSPAN17	tetraspanin 17	GO:0072659 protein localization to plasma membrane;GO:1990778 protein localization to cell periphery;GO:0051604 protein maturation			Nucleoplasm (reliability'])				0	0	0	0	0	0	0	0	0	0	0	0	0	0	0	0	0	0	0	0	1
5802	Ptprs	0	1	5802	Gene_ID	H. sapiens	5802	H. sapiens	PTPRS	protein tyrosine phosphatase receptor type S	GO:0034164 negative regulation of toll-like receptor 9 signaling pathway;GO:0032687 negative regulation of interferon-alpha production;GO:0048671 negative regulation of collateral sprouting		ENZYME proteins:Hydrolases; Predicted secreted proteins; Enzymes	Cytosol;Plasma membrane (reliability'])	Alendronic acid; Etidronic acid			0	0	0	0	0	0	0	0	0	0	0	0	1	0	1	0	0	0	0	1	1
23048	Fnbp1	0	1	23048	Gene_ID	H. sapiens	23048	H. sapiens	FNBP1	formin binding protein 1	GO:0006897 endocytosis;GO:0061024 membrane organization;GO:0098657 import into cell		Disease related genes; Predicted intracellular proteins					0	0	0	0	0	0	0	0	0	0	0	0	0	0	0	0	0	0	0	0	1
1636	Ace	1	0	1636	Gene_ID	H. sapiens	1636	H. sapiens	ACE	angiotensin I converting enzyme	GO:0060177 regulation of angiotensin metabolic process;GO:1903597 negative regulation of gap junction assembly;GO:0002019 regulation of renal output by angiotensin		CD markers; Predicted intracellular proteins; FDA approved drug targets:Small molecule drugs; Disease related genes; ENZYME proteins:Hydrolases; Predicted secreted proteins; Enzymes; Candidate cardiovascular disease genes; Peptidases:Metallopeptidases	Vesicles (reliability'])	Ramipril; Fosinopril; Trandolapril; Benazepril; Enalapril; Candoxatril; Moexipril; Lisinopril; Perindopril; Quinapril; Omapatrilat; Rescinnamine; Captopril; Cilazapril; Spirapril; Epicaptopril; N-acetyl-alpha-D-glucosamine; Temocapril; Enalaprilat; Zofenopril; Cilazaprilat	(M11736)SA MMP CYTOKINE CONNECTION	(M5951)HALLMARK SPERMATOGENESIS; (M5953)HALLMARK KRAS SIGNALING UP	1	0	1	0	0	0	1	0	0	0	0	0	0	0	0	0	0	0	0	0	1
23657	Slc7a11	1	0	23657	Gene_ID	H. sapiens	23657	H. sapiens	SLC7A11	solute carrier family 7 member 11	GO:1901494 regulation of cysteine metabolic process;GO:1903786 regulation of glutathione biosynthetic process;GO:0031335 regulation of sulfur amino acid metabolic process		FDA approved drug targets:Small molecule drugs; Transporters:Electrochemical Potential-driven transporters	Vesicles (reliability'])	Cystine; Glutamic acid; Riluzole; Sulfasalazine; Acetylcysteine; Thimerosal		(M5924)HALLMARK MTORC1 SIGNALING; (M5939)HALLMARK P53 PATHWAY; (M5945)HALLMARK HEME METABOLISM	0	0	0	1	0	0	0	0	0	0	0	1	0	0	0	0	0	0	1	1	1
3635	Inpp5d	1	0	3635	Gene_ID	H. sapiens	3635	H. sapiens	INPP5D	inositol polyphosphate-5-phosphatase D	GO:0045659 negative regulation of neutrophil differentiation;GO:0045658 regulation of neutrophil differentiation;GO:0030853 negative regulation of granulocyte differentiation		ENZYME proteins:Hydrolases; Predicted intracellular proteins; Enzymes	Cytosol (reliability'])		(M8626)SIG BCR SIGNALING PATHWAY		0	0	1	1	0	0	0	0	0	0	1	1	0	0	1	0	0	0	0	0	1
131578	Lrrc15	1	0	131578	Gene_ID	H. sapiens	131578	H. sapiens	LRRC15	leucine rich repeat containing 15	GO:0046813 receptor-mediated virion attachment to host cell;GO:0019062 virion attachment to host cell;GO:0044650 adhesion of symbiont to host cell			Vesicles (reliability']); Additional: Plasma membrane			(M5930)HALLMARK EPITHELIAL MESENCHYMAL TRANSITION	0	0	0	0	0	1	0	0	0	0	0	0	0	0	0	0	0	0	0	0	1
9419	Cript	0	1	9419	Gene_ID	H. sapiens	9419	H. sapiens	CRIPT	CXXC repeat containing interactor of PDZ3 domain	GO:1902897 regulation of postsynaptic density protein 95 clustering;GO:0097119 postsynaptic density protein 95 clustering;GO:1901626 regulation of postsynaptic membrane organization		Disease related genes; Predicted intracellular proteins	Nucleoli fibrillar center (reliability']); Additional: Nucleoplasm				0	0	0	0	0	0	0	1	0	0	0	0	0	0	0	0	0	0	0	0	1
6732	Srpk1	1	0	6732	Gene_ID	H. sapiens	6732	H. sapiens	SRPK1	SRSF protein kinase 1	GO:0035092 sperm chromatin condensation;GO:0007289 spermatid nucleus differentiation;GO:0045070 positive regulation of viral genome replication	CMGC Ser/Thr protein kinase family	Predicted intracellular proteins; ENZYME proteins:Transferases; Kinases:CMGC Ser/Thr protein kinases; Enzymes	Cytosol;Nucleoplasm (reliability']); Additional: Plasma membrane			(M5926)HALLMARK MYC TARGETS V1	0	0	0	0	0	0	0	0	0	0	0	0	0	0	0	0	0	0	0	0	1
8473	Ogt	0	1	8473	Gene_ID	H. sapiens	8473	H. sapiens	OGT	O-linked N-acetylglucosamine (GlcNAc) transferase	GO:0061087 positive regulation of histone H3-K27 methylation;GO:0061085 regulation of histone H3-K27 methylation;GO:0043981 histone H4-K5 acetylation		Predicted intracellular proteins; Disease related genes; Enzymes; Potential drug targets; ENZYME proteins:Transferases	Nucleoplasm (reliability']); Additional: Plasma membrane				0	1	0	1	0	0	0	0	1	0	1	0	0	0	0	0	0	0	0	0	1
10808	Hsph1	1	0	10808	Gene_ID	H. sapiens	10808	H. sapiens	HSPH1	heat shock protein family H (Hsp110) member 1	GO:0045345 positive regulation of MHC class I biosynthetic process;GO:0045341 MHC class I biosynthetic process;GO:0045343 regulation of MHC class I biosynthetic process		Cancer-related genes:Candidate cancer biomarkers; Predicted intracellular proteins	Cytosol (reliability']); Additional: Nucleoplasm	Phenethyl Isothiocyanate		(M5935)HALLMARK FATTY ACID METABOLISM	0	0	1	0	0	0	0	0	0	0	0	0	0	0	0	0	0	0	0	0	1
25979	Dhrs7b	0	1	25979	Gene_ID	H. sapiens	25979	H. sapiens	DHRS7B	dehydrogenase/reductase 7B	GO:0030223 neutrophil differentiation;GO:0030851 granulocyte differentiation;GO:0002573 myeloid leukocyte differentiation		Predicted intracellular proteins	Cell Junctions;Cytosol;Plasma membrane (reliability'])			(M5905)HALLMARK ADIPOGENESIS	0	0	0	0	0	0	0	0	0	0	1	0	0	0	0	0	0	0	0	0	1
79958	Dennd1c	1	0	79958	Gene_ID	H. sapiens	79958	H. sapiens	DENND1C	DENN domain containing 1C	GO:0032456 endocytic recycling;GO:0016197 endosomal transport;GO:0006897 endocytosis		Predicted intracellular proteins	Cytosol (reliability']); Additional: Centrosome;Nucleoplasm				0	0	0	0	0	0	0	0	0	0	0	0	0	0	0	0	0	0	0	0	1
961	Cd47	0	1	961	Gene_ID	H. sapiens	961	H. sapiens	CD47	CD47 molecule	GO:1905450 negative regulation of Fc-gamma receptor signaling pathway involved in phagocytosis;GO:0070487 monocyte aggregation;GO:1905449 regulation of Fc-gamma receptor signaling pathway involved in phagocytosis		CD markers; Predicted intracellular proteins; Transporters:Transporter channels and pores	Plasma membrane (reliability']); Additional: Vesicles		(M53)PID INTEGRIN3 PATHWAY	(M5911)HALLMARK INTERFERON ALPHA RESPONSE; (M5950)HALLMARK ALLOGRAFT REJECTION	0	0	1	0	0	0	0	1	0	0	0	1	1	0	1	1	0	1	0	0	1
1844	Dusp2	0	1	1844	Gene_ID	H. sapiens	1844	H. sapiens	DUSP2	dual specificity phosphatase 2	GO:0035970 peptidyl-threonine dephosphorylation;GO:0000188 inactivation of MAPK activity;GO:0001706 endoderm formation		ENZYME proteins:Hydrolases; Predicted intracellular proteins; Enzymes	Nuclear membrane (reliability']); Additional: Nucleoplasm			(M5928)HALLMARK MYC TARGETS V2; (M5890)HALLMARK TNFA SIGNALING VIA NFKB; (M5907)HALLMARK ESTROGEN RESPONSE LATE	0	0	0	0	0	0	0	0	0	0	0	0	0	0	0	0	0	0	0	0	1
9698	Pum1	0	1	9698	Gene_ID	H. sapiens	9698	H. sapiens	PUM1	pumilio RNA binding family member 1	GO:1900246 positive regulation of RIG-I signaling pathway;GO:0039535 regulation of RIG-I signaling pathway;GO:0039531 regulation of viral-induced cytoplasmic pattern recognition receptor signaling pathway		Predicted intracellular proteins	Cytosol (reliability']); Additional: Nucleoplasm				0	0	0	0	0	0	0	0	0	1	0	1	0	0	0	0	0	0	0	0	1
283871	Pgp	1	0	283871	Gene_ID	H. sapiens	283871	H. sapiens	PGP	phosphoglycolate phosphatase	GO:0006114 glycerol biosynthetic process;GO:0019401 alditol biosynthetic process;GO:0045721 negative regulation of gluconeogenesis		ENZYME proteins:Hydrolases; Predicted intracellular proteins; Enzymes	Nuclear bodies (reliability'])				0	0	0	0	0	0	0	0	0	0	0	0	0	0	0	0	0	0	0	0	1
8266	Ubl4a	0	1	8266	Gene_ID	H. sapiens	8266	H. sapiens	UBL4A	ubiquitin like 4A	GO:0071816 tail-anchored membrane protein insertion into ER membrane;GO:0045048 protein insertion into ER membrane;GO:0051205 protein insertion into membrane		Predicted intracellular proteins	Cytosol;Nucleoplasm (reliability'])				0	0	0	0	0	0	0	0	0	0	0	0	0	0	0	0	0	0	0	0	1
7538	Zfp36	1	0	7538	Gene_ID	H. sapiens	7538	H. sapiens	ZFP36	ZFP36 ring finger protein	GO:1901834 regulation of deadenylation-independent decapping of nuclear-transcribed mRNA;GO:1901835 positive regulation of deadenylation-independent decapping of nuclear-transcribed mRNA;GO:1904246 negative regulation of polynucleotide adenylyltransferase activity		Predicted intracellular proteins	Intermediate filaments (reliability'])		(M164)PID ERBB1 DOWNSTREAM PATHWAY	(M5890)HALLMARK TNFA SIGNALING VIA NFKB; (M5891)HALLMARK HYPOXIA; (M5907)HALLMARK ESTROGEN RESPONSE LATE	0	0	0	0	0	0	0	0	1	1	0	0	0	1	1	1	0	0	0	1	1
58498	Myl7	1	0	58498	Gene_ID	H. sapiens	58498	H. sapiens	MYL7	myosin light chain 7	GO:0006936 muscle contraction;GO:0003012 muscle system process;GO:0003008 system process		Predicted intracellular proteins				(M5909)HALLMARK MYOGENESIS	0	0	0	0	0	0	1	0	0	0	0	0	0	0	0	0	0	0	0	0	1
3485	Igfbp2	1	0	3485	Gene_ID	H. sapiens	3485	H. sapiens	IGFBP2	insulin like growth factor binding protein 2	GO:0010226 response to lithium ion;GO:0042104 positive regulation of activated T cell proliferation;GO:0043567 regulation of insulin-like growth factor receptor signaling pathway		Cancer-related genes:Candidate cancer biomarkers; Predicted secreted proteins; Predicted intracellular proteins	Endoplasmic reticulum (reliability'])		(M3008)NABA ECM GLYCOPROTEINS; (M5884)NABA CORE MATRISOME; (M5889)NABA MATRISOME	(M5941)HALLMARK UV RESPONSE UP; (M5930)HALLMARK EPITHELIAL MESENCHYMAL TRANSITION; (M5956)HALLMARK KRAS SIGNALING DN	0	0	1	0	0	0	0	0	1	1	0	0	0	0	0	0	1	0	0	0	1
1805	Dpt	1	0	1805	Gene_ID	H. sapiens	1805	H. sapiens	DPT	dermatopontin	GO:0030199 collagen fibril organization;GO:0030198 extracellular matrix organization;GO:0043062 extracellular structure organization		Predicted secreted proteins	Vesicles (reliability'])		(M3008)NABA ECM GLYCOPROTEINS; (M5884)NABA CORE MATRISOME; (M5889)NABA MATRISOME		0	0	0	0	0	0	0	1	0	0	0	0	1	0	0	0	0	0	0	0	1
10628	Txnip	1	0	10628	Gene_ID	H. sapiens	10628	H. sapiens	TXNIP	thioredoxin interacting protein	GO:0071228 cellular response to tumor cell;GO:0051782 negative regulation of cell division;GO:0002347 response to tumor cell		Cancer-related genes:Mutational cancer driver genes; Predicted intracellular proteins	Plasma membrane (reliability']); Additional: Cytosol			(M5911)HALLMARK INTERFERON ALPHA RESPONSE; (M5902)HALLMARK APOPTOSIS; (M5913)HALLMARK INTERFERON GAMMA RESPONSE	0	0	0	0	0	0	0	0	0	1	0	0	0	0	0	1	1	0	0	0	1
9780	Piezo1	0	1	9780	Gene_ID	H. sapiens	9780	H. sapiens	PIEZO1	piezo type mechanosensitive ion channel component 1	GO:0033634 positive regulation of cell-cell adhesion mediated by integrin;GO:0033625 positive regulation of integrin activation;GO:0033632 regulation of cell-cell adhesion mediated by integrin		Potential drug targets; Disease related genes; Predicted intracellular proteins; Transporters:Transporter channels and pores					0	0	1	0	0	0	0	0	0	0	0	0	0	0	0	0	0	0	0	0	1
2923	Pdia3	0	1	2923	Gene_ID	H. sapiens	2923	H. sapiens	PDIA3	protein disulfide isomerase family A member 3	GO:0034975 protein folding in endoplasmic reticulum;GO:0098760 response to interleukin-7;GO:0098761 cellular response to interleukin-7		Enzymes; Predicted intracellular proteins; ENZYME proteins:Isomerase	Endoplasmic reticulum (reliability'])	Zinc; Copper; Zinc acetate; Zinc chloride; Zinc sulfate, unspecified form			0	0	0	0	0	0	0	0	0	0	0	0	0	0	0	0	0	0	0	0	1
7403	Kdm6a	1	0	7403	Gene_ID	H. sapiens	7403	H. sapiens	KDM6A	lysine demethylase 6A	GO:0071557 histone H3-K27 demethylation;GO:0048570 notochord morphogenesis;GO:0032525 somite rostral/caudal axis specification		Disease related genes; Cancer-related genes:Mutational cancer driver genes; Predicted intracellular proteins; Cancer-related genes:Mutated cancer genes	Nucleoplasm (reliability']); Additional: Nucleoli				0	0	0	0	0	0	0	0	0	0	0	0	0	0	0	0	0	0	0	0	1
79711	Ipo4	0	1	79711	Gene_ID	H. sapiens	79711	H. sapiens	IPO4	importin 4	GO:0006335 DNA replication-dependent nucleosome assembly;GO:0034723 DNA replication-dependent nucleosome organization;GO:0006336 DNA replication-independent nucleosome assembly		Predicted intracellular proteins; Transporters:Transporter channels and pores	Cytosol (reliability'])			(M5928)HALLMARK MYC TARGETS V2	0	0	0	0	0	0	0	0	0	0	0	0	0	0	0	0	0	0	0	0	1
1160	Ckmt2	1	0	1160	Gene_ID	H. sapiens	1160	H. sapiens	CKMT2	creatine kinase, mitochondrial 2	GO:0006599 phosphagen metabolic process;GO:0006603 phosphocreatine metabolic process;GO:0042396 phosphagen biosynthetic process		FDA approved drug targets:Small molecule drugs; ENZYME proteins:Transferases; Predicted intracellular proteins; Enzymes		Creatine; Phosphocreatine		(M5909)HALLMARK MYOGENESIS	0	0	0	1	0	0	1	0	0	0	0	0	0	0	0	0	0	0	0	0	1
57396	Clk4	1	0	57396	Gene_ID	H. sapiens	57396	H. sapiens	CLK4	CDC like kinase 4	GO:0043484 regulation of RNA splicing;GO:0046777 protein autophosphorylation;GO:0018108 peptidyl-tyrosine phosphorylation	CMGC Ser/Thr protein kinase family	Predicted intracellular proteins; ENZYME proteins:Transferases; Kinases:CMGC Ser/Thr protein kinases; Enzymes	Actin filaments (reliability'])	Fostamatinib			0	0	0	0	0	0	0	0	0	0	0	0	0	0	0	0	0	0	0	0	1
84833	Usmg5	0	1	84833	Gene_ID	H. sapiens	84833	H. sapiens	ATP5MD	ATP synthase membrane subunit DAPIT				Mitochondria (reliability'])				0	0	0	0	0	0	0	0	0	0	0	0	0	0	0	0	0	0	0	0	1
4208	Mef2c	1	0	4208	Gene_ID	H. sapiens	4208	H. sapiens	MEF2C	myocyte enhancer factor 2C	GO:0003172 sinoatrial valve development;GO:0003185 sinoatrial valve morphogenesis;GO:0007521 muscle cell fate determination		Transcription factors:alpha-Helices exposed by beta-structures; Disease related genes; Predicted intracellular proteins	Nucleoplasm;Vesicles (reliability'])		(M30)PID HDAC CLASSII PATHWAY; (M270)PID MAPK TRK PATHWAY; (M229)PID P38 ALPHA BETA DOWNSTREAM PATHWAY	(M5909)HALLMARK MYOGENESIS	0	0	1	0	1	0	1	1	1	1	0	0	0	1	0	1	1	1	1	0	1
11319	Ecd	1	0	11319	Gene_ID	H. sapiens	11319	H. sapiens	ECD	ecdysoneless cell cycle regulator	GO:2000045 regulation of G1/S transition of mitotic cell cycle;GO:1902806 regulation of cell cycle G1/S phase transition;GO:0000082 G1/S transition of mitotic cell cycle		Predicted intracellular proteins	Cytosol;Nucleoplasm (reliability'])			(M5937)HALLMARK GLYCOLYSIS	0	0	0	0	0	0	0	0	0	0	0	0	0	0	0	0	0	0	0	0	1
64423	Inf2	0	1	64423	Gene_ID	H. sapiens	64423	H. sapiens	INF2	inverted formin 2	GO:0090140 regulation of mitochondrial fission;GO:0000266 mitochondrial fission;GO:0010821 regulation of mitochondrion organization		Disease related genes; Predicted intracellular proteins	Endoplasmic reticulum (reliability']); Additional: Nuclear bodies				0	1	0	0	0	0	0	1	0	0	0	0	0	0	0	0	0	0	0	0	1
60412	Exoc4	1	0	60412	Gene_ID	H. sapiens	60412	H. sapiens	EXOC4	exocyst complex component 4	GO:0090522 vesicle tethering involved in exocytosis;GO:0048341 paraxial mesoderm formation;GO:0099022 vesicle tethering		Predicted intracellular proteins; Transporters:Transporter channels and pores	Nucleoli (reliability']); Additional: Cytosol;Nucleoplasm		(M232)PID ECADHERIN STABILIZATION PATHWAY; (M16)PID INSULIN PATHWAY; (M67)PID ARF6 TRAFFICKING PATHWAY	(M5915)HALLMARK APICAL JUNCTION	0	0	0	0	0	0	0	0	0	0	0	0	0	0	0	0	0	0	0	0	1
51626	Dync2li1	0	1	51626	Gene_ID	H. sapiens	51626	H. sapiens	DYNC2LI1	dynein cytoplasmic 2 light intermediate chain 1	GO:0035721 intraciliary retrograde transport;GO:0035735 intraciliary transport involved in cilium assembly;GO:0042073 intraciliary transport		Disease related genes; Predicted intracellular proteins	Cytosol (reliability'])				0	0	0	0	0	0	0	0	0	0	0	0	0	0	0	0	0	0	0	0	1
51187	Rsl24d1	0	1	51187	Gene_ID	H. sapiens	51187	H. sapiens	RSL24D1	ribosomal L24 domain containing 1	GO:1902626 assembly of large subunit precursor of preribosome;GO:0000027 ribosomal large subunit assembly;GO:0042255 ribosome assembly		Ribosomal proteins; Predicted intracellular proteins	Nucleoli;Nucleoplasm (reliability'])	(S)-3-phenyllactic acid; Anisomycin; Puromycin			0	0	0	0	0	0	0	0	0	0	0	0	0	0	0	0	0	0	0	0	1
54438	Gfod1	1	0	54438	Gene_ID	H. sapiens	54438	H. sapiens	GFOD1	glucose-fructose oxidoreductase domain containing 1	GO:0055114 oxidation-reduction process;GO:0008152 metabolic process;GO:0008150 biological_process		Predicted secreted proteins; Predicted intracellular proteins	Cytosol;Nucleoplasm (reliability']); Additional: Plasma membrane				0	0	0	0	0	0	0	0	0	0	0	0	0	0	0	0	0	0	0	0	1
55225	Raver2	1	0	55225	Gene_ID	H. sapiens	55225	H. sapiens	RAVER2	ribonucleoprotein, PTB binding 2	GO:0000377 RNA splicing, via transesterification reactions with bulged adenosine as nucleophile;GO:0000398 mRNA splicing, via spliceosome;GO:0000375 RNA splicing, via transesterification reactions		Predicted intracellular proteins	Nucleoplasm (reliability'])				0	0	0	0	0	0	0	0	0	0	0	0	0	0	0	0	0	0	0	0	1
1303	Col12a1	1	0	1303	Gene_ID	H. sapiens	1303	H. sapiens	COL12A1	collagen type XII alpha 1 chain	GO:0035987 endodermal cell differentiation;GO:0030199 collagen fibril organization;GO:0001706 endoderm formation		Disease related genes; Predicted secreted proteins; Predicted intracellular proteins	Nucleoplasm (reliability'])		(M3005)NABA COLLAGENS; (M198)PID SYNDECAN 1 PATHWAY; (M160)PID AVB3 INTEGRIN PATHWAY	(M5930)HALLMARK EPITHELIAL MESENCHYMAL TRANSITION	0	0	0	0	0	0	0	1	0	0	0	0	1	0	0	0	0	0	0	0	1
4616	Gadd45b	1	0	4616	Gene_ID	H. sapiens	4616	H. sapiens	GADD45B	growth arrest and DNA damage inducible beta	GO:0000185 activation of MAPKKK activity;GO:1900745 positive regulation of p38MAPK cascade;GO:1900744 regulation of p38MAPK cascade		Predicted intracellular proteins	Nucleoplasm (reliability']); Additional: Cytosol		(M20)PID P38 MKK3 6PATHWAY; (M54)PID IL12 2PATHWAY	(M5902)HALLMARK APOPTOSIS; (M5947)HALLMARK IL2 STAT5 SIGNALING; (M5890)HALLMARK TNFA SIGNALING VIA NFKB	0	0	0	0	0	0	0	0	0	0	0	0	0	0	0	0	0	0	0	0	1
150726	Fbxo41	0	1	150726	Gene_ID	H. sapiens	150726	H. sapiens	FBXO41	F-box protein 41	GO:0000209 protein polyubiquitination;GO:0043687 post-translational protein modification;GO:0016567 protein ubiquitination		Predicted intracellular proteins	Cytosol;Nucleoplasm (reliability']); Additional: Plasma membrane	Phenethyl Isothiocyanate			0	0	0	0	0	0	0	0	0	0	0	0	0	0	0	0	0	0	0	0	1
130814	Pqlc3	0	1	130814	Gene_ID	H. sapiens	130814	H. sapiens	SLC66A3	solute carrier family 66 member 3				Cytosol (reliability'])			(M5905)HALLMARK ADIPOGENESIS	0	0	0	0	0	0	0	0	0	0	0	0	0	0	0	0	0	0	0	0	1
10652	Ykt6	1	0	10652	Gene_ID	H. sapiens	10652	H. sapiens	YKT6	YKT6 v-SNARE homolog	GO:0006904 vesicle docking involved in exocytosis;GO:0048278 vesicle docking;GO:0140029 exocytic process		Predicted intracellular proteins	Cytosol (reliability']); Additional: Mitochondria			(M5910)HALLMARK PROTEIN SECRETION; (M5941)HALLMARK UV RESPONSE UP; (M5924)HALLMARK MTORC1 SIGNALING	0	0	0	0	0	0	0	0	0	0	0	0	0	0	0	0	0	0	0	0	1
8365	Hist1h4h	0	1	8365	Gene_ID	H. sapiens	8365	H. sapiens	H4C8	H4 clustered histone 8	GO:0045653 negative regulation of megakaryocyte differentiation;GO:0006335 DNA replication-dependent nucleosome assembly;GO:0034723 DNA replication-dependent nucleosome organization		Disease related genes; Predicted intracellular proteins					0	0	0	0	0	0	0	0	0	0	0	0	0	0	1	0	0	0	0	0	1
2662	Gdf10	1	0	2662	Gene_ID	H. sapiens	2662	H. sapiens	GDF10	growth differentiation factor 10	GO:0010862 positive regulation of pathway-restricted SMAD protein phosphorylation;GO:0045668 negative regulation of osteoblast differentiation;GO:0060393 regulation of pathway-restricted SMAD protein phosphorylation		Predicted secreted proteins	Vesicles (reliability'])		(M5883)NABA SECRETED FACTORS; (M5885)NABA MATRISOME ASSOCIATED; (M5889)NABA MATRISOME		0	0	0	0	0	0	0	0	0	0	0	1	0	1	0	0	0	0	0	0	1
84888	Sppl2a	1	0	84888	Gene_ID	H. sapiens	84888	H. sapiens	SPPL2A	signal peptide peptidase like 2A	GO:0031293 membrane protein intracellular domain proteolysis;GO:0006509 membrane protein ectodomain proteolysis;GO:0033619 membrane protein proteolysis		Peptidases:Aspartic-type peptidases; Enzymes; Transporters:Transporter channels and pores	Vesicles (reliability'])			(M5913)HALLMARK INTERFERON GAMMA RESPONSE	0	0	0	0	0	0	0	0	0	0	0	0	0	0	0	1	0	0	0	0	1
146223	Cmtm4	0	1	146223	Gene_ID	H. sapiens	146223	H. sapiens	CMTM4	CKLF like MARVEL transmembrane domain containing 4				Golgi apparatus;Plasma membrane;Vesicles (reliability'])				0	0	0	0	0	0	0	0	0	0	0	0	0	0	0	0	0	0	0	0	1
100130933	Eln	1	0	100130933	Gene_ID	H. sapiens	100130933	H. sapiens	SMIM6	small integral membrane protein 6			Transporters:Transporter channels and pores	Nucleoplasm (reliability'])				0	0	0	0	0	0	0	0	0	0	0	0	1	0	0	0	0	0	0	0	1
1365	Cldn3	1	0	1365	Gene_ID	H. sapiens	1365	H. sapiens	CLDN3	claudin 3	GO:0014045 establishment of endothelial blood-brain barrier;GO:1903348 positive regulation of bicellular tight junction assembly;GO:0060856 establishment of blood-brain barrier		Potential drug targets; Cancer-related genes:Candidate cancer biomarkers; Disease related genes; Transporters:Transporter channels and pores	Cell Junctions (reliability'])			(M5937)HALLMARK GLYCOLYSIS	0	0	0	0	0	1	0	1	0	0	0	0	0	0	0	0	0	0	0	1	1
4851	Hn1	1	0	4851	Gene_ID	H. sapiens	4851	H. sapiens	NOTCH1	notch receptor 1	GO:0003178 coronary sinus valve development;GO:0003182 coronary sinus valve morphogenesis;GO:0003270 Notch signaling pathway involved in regulation of secondary heart field cardioblast proliferation		Disease related genes; Transporters; Cancer-related genes:Candidate cancer biomarkers; Cancer-related genes:Mutational cancer driver genes; Potential drug targets; Cancer-related genes:Mutated cancer genes	Nucleoplasm (reliability'])		(M70)PID PS1 PATHWAY; (M236)PID DELTA NP63 PATHWAY; (M288)PID HES HEY PATHWAY	(M5903)HALLMARK NOTCH SIGNALING; (M5895)HALLMARK WNT BETA CATENIN SIGNALING; (M5909)HALLMARK MYOGENESIS	1	0	1	0	1	1	1	0	1	1	0	1	1	1	1	1	0	1	1	1	1
4313	Mmp2	1	0	4313	Gene_ID	H. sapiens	4313	H. sapiens	MMP2	matrix metallopeptidase 2	GO:0001957 intramembranous ossification;GO:0036072 direct ossification;GO:0001955 blood vessel maturation		Predicted intracellular proteins; FDA approved drug targets:Small molecule drugs; Disease related genes; ENZYME proteins:Hydrolases; Cancer-related genes:Candidate cancer biomarkers; Cancer-related genes:Mutational cancer driver genes; Predicted secreted proteins; Enzymes; Candidate cardiovascular disease genes; Peptidases:Metallopeptidases	Vesicles (reliability'])	Marimastat; Captopril; SC-74020; Halofuginone; AE-941; Endostatin	(M63)PID AVB3 OPN PATHWAY; (M240)PID SYNDECAN 2 PATHWAY; (M65)PID FRA PATHWAY	(M5946)HALLMARK COAGULATION; (M5902)HALLMARK APOPTOSIS; (M5915)HALLMARK APICAL JUNCTION	0	0	0	0	1	0	0	0	1	0	0	0	1	0	0	0	0	0	0	0	1
4124	Man2a1	0	1	4124	Gene_ID	H. sapiens	4124	H. sapiens	MAN2A1	mannosidase alpha class 2A member 1	GO:0006013 mannose metabolic process;GO:0006491 N-glycan processing;GO:0006517 protein deglycosylation		ENZYME proteins:Hydrolases; Enzymes	Golgi apparatus (reliability'])	Tridolgosir; 2-deoxy-2-fluoro-alpha-D-mannosyl fluoride; Ghavamiol; Kifunensine; 5-fluoro-beta-L-gulosyl fluoride; 5-Thio-a/B-D-Mannopyranosylamine; 1-deoxymannojirimycin; (1R,2R,3R,4S,5R)-4-(BENZYLAMINO)-5-(METHYLTHIO)CYCLOPENTANE-1,2,3-TRIOL; (1S,2S,3R,6R)-4-(hydroxymethyl)-6-(octylamino)cyclohex-4-ene-1,2,3-triol			0	1	0	1	0	0	0	0	0	0	0	0	0	0	0	0	0	0	0	0	1
80152	Cenpt	1	0	80152	Gene_ID	H. sapiens	80152	H. sapiens	CENPT	centromere protein T	GO:1903394 protein localization to kinetochore involved in kinetochore assembly;GO:0051382 kinetochore assembly;GO:0034501 protein localization to kinetochore		Predicted intracellular proteins	Nuclear bodies (reliability'])				0	0	0	0	0	0	0	0	0	0	0	0	0	0	0	0	0	0	0	0	1
729515	Tmem242	0	1	729515	Gene_ID	H. sapiens	729515	H. sapiens	TMEM242	transmembrane protein 242								0	0	0	0	0	0	0	0	0	0	0	0	0	0	0	0	0	0	0	0	1
7138	Tnnt1	1	0	7138	Gene_ID	H. sapiens	7138	H. sapiens	TNNT1	troponin T1, slow skeletal type	GO:0031444 slow-twitch skeletal muscle fiber contraction;GO:0003010 voluntary skeletal muscle contraction;GO:0014721 twitch skeletal muscle contraction		Disease related genes; Predicted intracellular proteins	Cytosol;Golgi apparatus;Nucleoplasm (reliability'])			(M5909)HALLMARK MYOGENESIS	0	0	0	0	0	0	1	1	0	0	0	0	0	0	0	0	0	1	0	0	1
1349	Cox7b	0	1	1349	Gene_ID	H. sapiens	1349	H. sapiens	COX7B	cytochrome c oxidase subunit 7B	GO:0006123 mitochondrial electron transport, cytochrome c to oxygen;GO:0019646 aerobic electron transport chain;GO:0009060 aerobic respiration		Disease related genes		Cholic Acid; N-Formylmethionine		(M5905)HALLMARK ADIPOGENESIS; (M5936)HALLMARK OXIDATIVE PHOSPHORYLATION	0	1	0	1	0	0	0	0	0	0	0	0	0	0	0	0	0	0	0	0	1
58473	Plekhb1	1	0	58473	Gene_ID	H. sapiens	58473	H. sapiens	PLEKHB1	pleckstrin homology domain containing B1	GO:0007602 phototransduction;GO:0009583 detection of light stimulus;GO:0009581 detection of external stimulus		Predicted intracellular proteins					0	0	0	0	0	0	0	0	0	0	0	0	0	0	0	0	0	0	0	0	1
5211	Pfkl	1	0	5211	Gene_ID	H. sapiens	5211	H. sapiens	PFKL	phosphofructokinase, liver type	GO:0030388 fructose 1,6-bisphosphate metabolic process;GO:0006002 fructose 6-phosphate metabolic process;GO:0006735 NADH regeneration		ENZYME proteins:Transferases; Predicted intracellular proteins; Enzymes			(M255)PID HIF1 TFPATHWAY	(M5891)HALLMARK HYPOXIA; (M5905)HALLMARK ADIPOGENESIS; (M5924)HALLMARK MTORC1 SIGNALING	1	1	0	1	0	0	0	0	0	0	1	0	0	0	0	0	0	0	1	0	1
2029	Ensa	0	1	2029	Gene_ID	H. sapiens	2029	H. sapiens	ENSA	endosulfine alpha	GO:0032515 negative regulation of phosphoprotein phosphatase activity;GO:0035308 negative regulation of protein dephosphorylation;GO:0010923 negative regulation of phosphatase activity		Predicted intracellular proteins	Nucleoli;Nucleoplasm (reliability']); Additional: Cytosol;Microtubules				0	0	0	0	0	0	0	0	0	0	0	0	0	0	0	0	0	0	0	0	1
9699	Rims2	0	1	9699	Gene_ID	H. sapiens	9699	H. sapiens	RIMS2	regulating synaptic membrane exocytosis 2	GO:0097151 positive regulation of inhibitory postsynaptic potential;GO:0098828 modulation of inhibitory postsynaptic potential;GO:0061669 spontaneous neurotransmitter secretion		Predicted intracellular proteins	Cytosol;Plasma membrane (reliability'])				0	0	0	0	0	0	0	0	0	0	0	0	0	0	0	0	0	0	0	0	1
7461	Clip2	0	1	7461	Gene_ID	H. sapiens	7461	H. sapiens	CLIP2	CAP-Gly domain containing linker protein 2	GO:0031122 cytoplasmic microtubule organization;GO:0000226 microtubule cytoskeleton organization;GO:0097435 supramolecular fiber organization		Predicted intracellular proteins				(M5893)HALLMARK MITOTIC SPINDLE	0	0	0	0	0	0	0	1	0	0	0	0	0	0	0	0	0	0	0	0	1
1892	Echs1	0	1	1892	Gene_ID	H. sapiens	1892	H. sapiens	ECHS1	enoyl-CoA hydratase, short chain 1	GO:0006635 fatty acid beta-oxidation;GO:0019395 fatty acid oxidation;GO:0034440 lipid oxidation		Predicted intracellular proteins; Disease related genes; ENZYME proteins:Lyases; Enzymes; Potential drug targets	Mitochondria (reliability'])	Hexanoyl-CoA; Octanoyl-Coenzyme A; Acetoacetyl-CoA; 4-(N,N-Dimethylamino)cinnamoyl-CoA; Omega-3-carboxylic acids		(M5935)HALLMARK FATTY ACID METABOLISM; (M5905)HALLMARK ADIPOGENESIS; (M5936)HALLMARK OXIDATIVE PHOSPHORYLATION	0	0	0	0	0	0	0	0	0	0	1	0	0	0	0	0	0	0	0	0	1
116362	Rbp7	0	1	116362	Gene_ID	H. sapiens	116362	H. sapiens	RBP7	retinol binding protein 7			Predicted intracellular proteins	Cytosol;Nuclear speckles (reliability'])				0	0	0	0	0	0	0	0	0	0	0	0	0	0	0	0	0	0	0	0	1
65003	Mrpl11	0	1	65003	Gene_ID	H. sapiens	65003	H. sapiens	MRPL11	mitochondrial ribosomal protein L11	GO:0000027 ribosomal large subunit assembly;GO:0042255 ribosome assembly;GO:0042273 ribosomal large subunit biogenesis		Ribosomal proteins; Predicted intracellular proteins	Mitochondria (reliability'])			(M5936)HALLMARK OXIDATIVE PHOSPHORYLATION	0	0	0	0	0	0	0	0	0	0	0	0	0	0	0	0	0	0	0	0	1
94031	Htra3	1	0	94031	Gene_ID	H. sapiens	94031	H. sapiens	HTRA3	HtrA serine peptidase 3	GO:0030514 negative regulation of BMP signaling pathway;GO:0030512 negative regulation of transforming growth factor beta receptor signaling pathway;GO:1903845 negative regulation of cellular response to transforming growth factor beta stimulus		Peptidases:Serine-type peptidases; Predicted secreted proteins; Enzymes	Vesicles (reliability'])		(M3468)NABA ECM REGULATORS; (M5885)NABA MATRISOME ASSOCIATED; (M5889)NABA MATRISOME		0	0	0	0	0	0	0	0	0	0	0	0	0	1	0	0	0	0	0	0	1
5880	Rac2	1	0	5880	Gene_ID	H. sapiens	5880	H. sapiens	RAC2	Rac family small GTPase 2	GO:0071593 lymphocyte aggregation;GO:0060753 regulation of mast cell chemotaxis;GO:0002551 mast cell chemotaxis		Disease related genes; Predicted intracellular proteins; RAS pathway related proteins			(M210)PID IL8 CXCR2 PATHWAY	(M5915)HALLMARK APICAL JUNCTION	1	0	1	1	0	1	0	1	0	0	0	1	0	0	0	0	0	0	1	0	1
79005	Scnm1	1	0	79005	Gene_ID	H. sapiens	79005	H. sapiens	SCNM1	sodium channel modifier 1	GO:0000380 alternative mRNA splicing, via spliceosome;GO:0000377 RNA splicing, via transesterification reactions with bulged adenosine as nucleophile;GO:0000398 mRNA splicing, via spliceosome		Predicted intracellular proteins	Nucleoplasm (reliability'])				0	0	0	0	0	0	0	0	0	0	0	0	0	0	0	0	0	0	0	0	1
114907	Fbxo32	1	0	114907	Gene_ID	H. sapiens	114907	H. sapiens	FBXO32	F-box protein 32	GO:0014877 response to muscle inactivity involved in regulation of muscle adaptation;GO:0014894 response to denervation involved in regulation of muscle adaptation;GO:0014870 response to muscle inactivity		Disease related genes; Predicted intracellular proteins	Cytosol;Nucleoplasm (reliability'])		(M136)PID FOXO PATHWAY		0	0	0	0	0	0	0	0	1	1	0	0	0	0	0	0	0	0	0	0	1
2800	Golga1	0	1	2800	Gene_ID	H. sapiens	2800	H. sapiens	GOLGA1	golgin A1			Predicted intracellular proteins	Golgi apparatus (reliability'])				0	0	0	0	0	0	0	0	0	0	0	0	0	0	0	0	0	0	0	0	1
1601	Dab2	0	1	1601	Gene_ID	H. sapiens	1601	H. sapiens	DAB2	DAB adaptor protein 2	GO:0035026 leading edge cell differentiation;GO:2000370 positive regulation of clathrin-dependent endocytosis;GO:2000643 positive regulation of early endosome to late endosome transport		Predicted intracellular proteins	Plasma membrane;Vesicles (reliability']); Additional: Nucleoli fibrillar center		(M286)PID TGFBR PATHWAY	(M5942)HALLMARK UV RESPONSE DN; (M5930)HALLMARK EPITHELIAL MESENCHYMAL TRANSITION	0	0	0	0	0	1	0	0	1	1	0	0	0	1	0	0	0	0	0	0	1
6001	Rgs10	0	1	6001	Gene_ID	H. sapiens	6001	H. sapiens	RGS10	regulator of G protein signaling 10	GO:0007213 G protein-coupled acetylcholine receptor signaling pathway;GO:0095500 acetylcholine receptor signaling pathway;GO:1903831 signal transduction involved in cellular response to ammonium ion		Predicted intracellular proteins	Nucleoplasm;Plasma membrane (reliability'])				0	0	0	0	0	0	0	0	1	0	0	0	0	0	0	0	0	0	0	0	1
284611	Fam102b	0	1	284611	Gene_ID	H. sapiens	284611	H. sapiens	FAM102B	family with sequence similarity 102 member B			Predicted intracellular proteins	Cytosol;Nucleoli (reliability'])				0	0	0	0	0	0	0	0	0	0	0	0	0	0	0	0	0	0	0	0	1
3775	Kcnk1	1	0	3775	Gene_ID	H. sapiens	3775	H. sapiens	KCNK1	potassium two pore domain channel subfamily K member 1	GO:0060075 regulation of resting membrane potential;GO:0030322 stabilization of membrane potential;GO:0035094 response to nicotine		Voltage-gated ion channels:Two-P Potassium Channels	Vesicles (reliability'])	Ibutilide; Quinidine; Quinidine barbiturate			0	0	0	0	0	0	1	0	0	0	0	0	0	0	0	0	0	0	0	0	1
23136	Epb41l3	1	0	23136	Gene_ID	H. sapiens	23136	H. sapiens	EPB41L3	erythrocyte membrane protein band 4.1 like 3	GO:0002175 protein localization to paranode region of axon;GO:0071205 protein localization to juxtaparanode region of axon;GO:0030913 paranodal junction assembly		Predicted intracellular proteins	Cell Junctions;Plasma membrane (reliability'])			(M5953)HALLMARK KRAS SIGNALING UP	0	0	0	0	0	0	0	1	0	0	0	0	0	0	0	0	0	1	0	0	1
351	App	0	1	351	Gene_ID	H. sapiens	351	H. sapiens	APP	amyloid beta precursor protein	GO:0071874 cellular response to norepinephrine stimulus;GO:0051563 smooth endoplasmic reticulum calcium ion homeostasis;GO:0071873 response to norepinephrine		FDA approved drug targets:Small molecule drugs; Disease related genes; Predicted intracellular proteins; Transporters:Transporter channels and pores	Golgi apparatus (reliability']); Additional: Vesicles	Deferoxamine; Aluminium; Zinc; L-methionine (R)-S-oxide; Resveratrol; Tromethamine; Phenserine; Tetrathiomolybdate; CAD106; Mito-4509; Edonerpic; Dimercaprol; Copper; Florbetaben (18F); Florbetapir (18F); Flutemetamol (18F); Zinc acetate; Aluminium phosphate; Aluminum acetate; Zinc chloride; Zinc sulfate, unspecified form	(M33)PID GLYPICAN 1PATHWAY; (M220)PID CASPASE PATHWAY; (M153)PID P75 NTR PATHWAY	(M5944)HALLMARK ANGIOGENESIS; (M5916)HALLMARK APICAL SURFACE; (M5902)HALLMARK APOPTOSIS	0	1	0	1	0	1	0	1	1	1	1	1	1	1	0	1	1	0	0	0	1
84693	Mcee	0	1	84693	Gene_ID	H. sapiens	84693	H. sapiens	MCEE	methylmalonyl-CoA epimerase	GO:0046491 L-methylmalonyl-CoA metabolic process;GO:0019626 short-chain fatty acid catabolic process;GO:0046459 short-chain fatty acid metabolic process		Predicted intracellular proteins; ENZYME proteins:Isomerase; Disease related genes; Enzymes; Potential drug targets	Nucleoli (reliability'])			(M5935)HALLMARK FATTY ACID METABOLISM	0	0	0	1	0	0	0	0	0	0	1	0	0	0	0	0	0	0	0	0	1
9412	Med21	0	1	9412	Gene_ID	H. sapiens	9412	H. sapiens	MED21	mediator complex subunit 21	GO:0001824 blastocyst development;GO:0019827 stem cell population maintenance;GO:0098727 maintenance of cell number		Predicted intracellular proteins	Nucleoplasm (reliability']); Additional: Cytosol;Nucleoli				0	0	0	0	0	0	0	0	0	0	1	0	0	0	0	0	0	0	0	0	1
9879	Ddx46	1	0	9879	Gene_ID	H. sapiens	9879	H. sapiens	DDX46	DEAD-box helicase 46	GO:0000377 RNA splicing, via transesterification reactions with bulged adenosine as nucleophile;GO:0000398 mRNA splicing, via spliceosome;GO:0000375 RNA splicing, via transesterification reactions		ENZYME proteins:Hydrolases; Predicted intracellular proteins; Enzymes	Nuclear speckles (reliability'])				0	0	0	0	0	0	0	0	0	0	0	0	0	0	0	0	0	0	0	0	1
6515	Slc2a3	1	0	6515	Gene_ID	H. sapiens	6515	H. sapiens	SLC2A3	solute carrier family 2 member 3	GO:0098708 glucose import across plasma membrane;GO:0098704 carbohydrate import across plasma membrane;GO:0019852 L-ascorbic acid metabolic process		Transporters:Electrochemical Potential-driven transporters	Plasma membrane (reliability'])			(M5947)HALLMARK IL2 STAT5 SIGNALING; (M5890)HALLMARK TNFA SIGNALING VIA NFKB; (M5891)HALLMARK HYPOXIA	1	0	0	1	0	0	0	0	0	0	0	0	0	0	0	0	0	0	0	0	1
389058	Sp5	1	0	389058	Gene_ID	H. sapiens	389058	H. sapiens	SP5	Sp5 transcription factor	GO:0036342 post-anal tail morphogenesis;GO:0060349 bone morphogenesis;GO:0060348 bone development		Transcription factors:Zinc-coordinating DNA-binding domains; Predicted intracellular proteins	Nucleoli (reliability']); Additional: Nucleoplasm		(M223)PID BETA CATENIN NUC PATHWAY		0	0	0	0	0	0	0	0	0	1	0	0	0	0	0	0	0	0	0	0	1
196743	Paox	0	1	196743	Gene_ID	H. sapiens	196743	H. sapiens	PAOX	polyamine oxidase	GO:0046203 spermidine catabolic process;GO:0010967 regulation of polyamine biosynthetic process;GO:1901304 regulation of spermidine biosynthetic process		ENZYME proteins:Oxidoreductases; Predicted intracellular proteins; Enzymes	Centrosome;Nucleoplasm (reliability'])		(M118)PID INTEGRIN A9B1 PATHWAY	(M5948)HALLMARK BILE ACID METABOLISM	0	0	0	0	0	0	0	0	0	0	0	0	0	0	0	0	0	0	0	0	1
2548	Gaa	0	1	2548	Gene_ID	H. sapiens	2548	H. sapiens	GAA	glucosidase alpha, acid	GO:0043181 vacuolar sequestering;GO:0002086 diaphragm contraction;GO:0005985 sucrose metabolic process		Predicted intracellular proteins; FDA approved drug targets:Small molecule drugs; Disease related genes; ENZYME proteins:Hydrolases; Enzymes		Acarbose; Miglitol; AT2220	(M288)PID HES HEY PATHWAY	(M5891)HALLMARK HYPOXIA; (M5909)HALLMARK MYOGENESIS	0	1	0	1	0	0	0	0	0	0	0	0	0	0	0	0	0	0	0	0	1
84064	Hdhd2	0	1	84064	Gene_ID	H. sapiens	84064	H. sapiens	HDHD2	haloacid dehalogenase like hydrolase domain containing 2	GO:0016311 dephosphorylation;GO:0006796 phosphate-containing compound metabolic process;GO:0006793 phosphorus metabolic process		Predicted intracellular proteins	Vesicles (reliability'])				0	0	0	0	0	0	0	0	0	0	0	0	0	0	0	0	0	0	0	0	1
22980	Tcf25	0	1	22980	Gene_ID	H. sapiens	22980	H. sapiens	TCF25	transcription factor 25	GO:0007507 heart development;GO:0000122 negative regulation of transcription by RNA polymerase II;GO:0072359 circulatory system development		Predicted intracellular proteins; Transcription factors:Yet undefined DNA-binding domains					0	0	0	0	0	0	0	0	0	0	0	0	0	0	0	0	0	0	0	0	1
3742	Kcna6	1	0	3742	Gene_ID	H. sapiens	3742	H. sapiens	KCNA6	potassium voltage-gated channel subfamily A member 6	GO:0051260 protein homooligomerization;GO:0071804 cellular potassium ion transport;GO:0071805 potassium ion transmembrane transport		FDA approved drug targets:Small molecule drugs; Voltage-gated ion channels:Voltage-Gated Potassium Channels		Dalfampridine			0	0	0	0	0	0	0	0	0	0	0	0	0	0	0	0	0	0	0	0	1
58506	Scaf1	0	1	58506	Gene_ID	H. sapiens	58506	H. sapiens	SCAF1	SR-related CTD associated factor 1	GO:0008380 RNA splicing;GO:0006397 mRNA processing;GO:0016071 mRNA metabolic process		Predicted intracellular proteins	Nucleoplasm (reliability']); Additional: Cytosol				0	0	0	0	0	0	0	0	0	0	0	0	0	0	0	0	0	0	0	0	1
122622	Adssl1	1	0	122622	Gene_ID	H. sapiens	122622	H. sapiens	ADSS1	adenylosuccinate synthase 1	GO:0044208 'de novo' AMP biosynthetic process;GO:0006167 AMP biosynthetic process;GO:0006531 aspartate metabolic process		Predicted intracellular proteins; Disease related genes; ENZYME proteins:Ligase; Enzymes; Potential drug targets		Aspartic acid; Hadacidin; 6-O-Phosphoryl Inosine Monophosphate; Guanosine-5'-Triphosphate; Guanosine-5'-Diphosphate; Adenylosuccinic acid; Inosinic Acid; Alanosine			0	0	0	1	0	0	0	0	0	0	0	0	0	0	0	0	0	0	0	0	1
1408	Cry2	1	0	1408	Gene_ID	H. sapiens	1408	H. sapiens	CRY2	cryptochrome circadian regulator 2	GO:0000719 photoreactive repair;GO:0009637 response to blue light;GO:0009785 blue light signaling pathway		Predicted intracellular proteins	Nuclear speckles (reliability']); Additional: Cytosol		(M95)PID CIRCADIAN PATHWAY		0	0	0	0	0	0	0	0	1	1	0	0	0	0	0	0	0	0	0	0	1
1359	Cpa3	0	1	1359	Gene_ID	H. sapiens	1359	H. sapiens	CPA3	carboxypeptidase A3	GO:0002002 regulation of angiotensin levels in blood;GO:0002003 angiotensin maturation;GO:0001991 regulation of systemic arterial blood pressure by circulatory renin-angiotensin		ENZYME proteins:Hydrolases; Predicted secreted proteins; Peptidases:Metallopeptidases; Enzymes	Golgi apparatus (reliability']); Additional: Nucleoplasm				0	0	0	0	0	0	0	0	0	0	0	0	1	0	0	0	0	0	0	0	1
55345	Zgrf1	0	1	55345	Gene_ID	H. sapiens	55345	H. sapiens	ZGRF1	zinc finger GRF-type containing 1	GO:0071932 replication fork reversal;GO:0031297 replication fork processing;GO:0045005 DNA-dependent DNA replication maintenance of fidelity		Predicted intracellular proteins	Cytosol (reliability'])				0	0	0	0	0	0	0	0	0	0	0	0	0	0	0	0	0	0	0	0	1
1285	Col4a3	1	0	1285	Gene_ID	H. sapiens	1285	H. sapiens	COL4A3	collagen type IV alpha 3 chain	GO:0032836 glomerular basement membrane development;GO:0038063 collagen-activated tyrosine kinase receptor signaling pathway;GO:0038065 collagen-activated signaling pathway		Cancer-related genes:Candidate cancer biomarkers; Disease related genes; Predicted secreted proteins; Predicted intracellular proteins	Vesicles (reliability']); Additional: Endoplasmic reticulum		(M5887)NABA BASEMENT MEMBRANES; (M53)PID INTEGRIN3 PATHWAY; (M3005)NABA COLLAGENS		0	0	0	0	1	0	0	0	0	0	0	0	1	0	0	0	0	0	0	0	1
23032	Usp33	0	1	23032	Gene_ID	H. sapiens	23032	H. sapiens	USP33	ubiquitin specific peptidase 33	GO:0070536 protein K63-linked deubiquitination;GO:0071108 protein K48-linked deubiquitination;GO:0051298 centrosome duplication		ENZYME proteins:Hydrolases; Peptidases:Cysteine-type peptidases; Predicted intracellular proteins; Enzymes	Golgi apparatus;Nucleoplasm (reliability'])				0	0	0	0	0	0	0	0	0	0	0	1	0	0	0	0	0	0	0	0	1
4543	Mt1	1	0	4543	Gene_ID	H. sapiens	4543	H. sapiens	MTNR1A	melatonin receptor 1A	GO:0007617 mating behavior;GO:0019098 reproductive behavior;GO:0007618 mating		FDA approved drug targets:Small molecule drugs; G-protein coupled receptors:GPCRs excl olfactory receptors; Transporters		Ramelteon; Melatonin; Resveratrol; Agomelatine; Tasimelteon		(M5951)HALLMARK SPERMATOGENESIS	0	0	0	0	0	0	0	0	0	0	0	0	0	0	0	0	0	0	0	0	1
128	Adh5	0	1	128	Gene_ID	H. sapiens	128	H. sapiens	ADH5	alcohol dehydrogenase 5 (class III), chi polypeptide	GO:0046294 formaldehyde catabolic process;GO:0046292 formaldehyde metabolic process;GO:0010430 fatty acid omega-oxidation		ENZYME proteins:Oxidoreductases; Predicted intracellular proteins; Enzymes		NADH; Lauric acid; 12-Hydroxydodecanoic Acid; S-Hydroxymethyl Glutathione		(M5934)HALLMARK XENOBIOTIC METABOLISM	0	1	0	0	0	0	0	0	0	0	1	0	0	0	0	1	0	0	0	0	1
4720	Ndufs2	0	1	4720	Gene_ID	H. sapiens	4720	H. sapiens	NDUFS2	NADH:ubiquinone oxidoreductase core subunit S2	GO:0006120 mitochondrial electron transport, NADH to ubiquinone;GO:0010257 NADH dehydrogenase complex assembly;GO:0032981 mitochondrial respiratory chain complex I assembly		ENZYME proteins:Oxidoreductases; Predicted intracellular proteins; Disease related genes; Enzymes; Potential drug targets	Mitochondria (reliability'])	NADH	(M19)PID P73PATHWAY	(M5938)HALLMARK REACTIVE OXYGEN SPECIES PATHWAY; (M5936)HALLMARK OXIDATIVE PHOSPHORYLATION	0	1	0	1	0	0	0	0	0	0	0	0	0	0	0	0	0	0	0	0	1
5437	Polr2h	0	1	5437	Gene_ID	H. sapiens	5437	H. sapiens	POLR2H	RNA polymerase II, I and III subunit H	GO:0006362 transcription elongation from RNA polymerase I promoter;GO:0006363 termination of RNA polymerase I transcription;GO:0006370 7-methylguanosine mRNA capping		RNA polymerase related proteins; Predicted intracellular proteins	Nucleoplasm (reliability'])			(M5898)HALLMARK DNA REPAIR; (M5941)HALLMARK UV RESPONSE UP	0	1	0	0	0	0	0	0	0	0	0	0	0	1	0	0	0	0	0	0	1
56987	Bbx	0	1	56987	Gene_ID	H. sapiens	56987	H. sapiens	BBX	BBX high mobility group box domain containing	GO:0060348 bone development;GO:0001501 skeletal system development;GO:0000122 negative regulation of transcription by RNA polymerase II		Transcription factors:Other all-alpha-helical DNA-binding domains; Predicted intracellular proteins	Nucleoplasm (reliability']); Additional: Cytosol				0	0	0	0	0	0	0	0	0	0	0	0	0	0	0	0	0	0	0	0	1
10613	Erlin1	1	0	10613	Gene_ID	H. sapiens	10613	H. sapiens	ERLIN1	ER lipid raft associated 1	GO:0045541 negative regulation of cholesterol biosynthetic process;GO:0090206 negative regulation of cholesterol metabolic process;GO:0106119 negative reguation of sterol biosynthetic process		Potential drug targets; Disease related genes; Predicted intracellular proteins; Transporters:Transporter channels and pores	Endoplasmic reticulum (reliability'])				0	0	0	0	0	0	0	0	0	0	1	0	0	0	0	0	0	0	0	0	1
57665	Rdh14	1	0	57665	Gene_ID	H. sapiens	57665	H. sapiens	RDH14	retinol dehydrogenase 14	GO:0042572 retinol metabolic process;GO:0034308 primary alcohol metabolic process;GO:0001523 retinoid metabolic process		Predicted intracellular proteins	Nucleoplasm (reliability']); Additional: Cytosol	Vitamin A			0	0	0	0	0	0	0	0	0	0	0	0	0	0	0	0	0	0	0	0	1
117156	Scgb3a2	1	0	117156	Gene_ID	H. sapiens	117156	H. sapiens	SCGB3A2	secretoglobin family 3A member 2	GO:0006898 receptor-mediated endocytosis;GO:0006897 endocytosis;GO:0098657 import into cell		Predicted secreted proteins; Predicted intracellular proteins					0	0	0	0	0	0	0	0	0	0	0	0	0	0	0	0	0	0	0	0	1
619208	Fam229b	0	1	619208	Gene_ID	H. sapiens	619208	H. sapiens	FAM229B	family with sequence similarity 229 member B			Predicted intracellular proteins	Nucleoplasm (reliability']); Additional: Golgi apparatus;Nucleoli				0	0	0	0	0	0	0	0	0	0	0	0	0	0	0	0	0	0	0	0	1
1769	Dnah8	1	0	1769	Gene_ID	H. sapiens	1769	H. sapiens	DNAH8	dynein axonemal heavy chain 8	GO:0036158 outer dynein arm assembly;GO:0070286 axonemal dynein complex assembly;GO:0001539 cilium or flagellum-dependent cell motility		Predicted intracellular proteins					0	1	0	0	0	0	0	0	0	0	0	0	0	0	0	0	0	0	0	0	1
23476	Brd4	0	1	23476	Gene_ID	H. sapiens	23476	H. sapiens	BRD4	bromodomain containing 4	GO:1901407 regulation of phosphorylation of RNA polymerase II C-terminal domain;GO:2001255 positive regulation of histone H3-K36 trimethylation;GO:0000416 positive regulation of histone H3-K36 methylation		Predicted intracellular proteins; Disease related genes; Cancer-related genes	Nucleoplasm (reliability'])		(M7955)SIG INSULIN RECEPTOR PATHWAY IN CARDIAC MYOCYTES		0	0	0	0	0	0	0	0	0	0	0	0	0	0	0	0	0	0	0	0	1
1634	Dcn	1	0	1634	Gene_ID	H. sapiens	1634	H. sapiens	DCN	decorin	GO:0019800 peptide cross-linking via chondroitin 4-sulfate glycosaminoglycan;GO:0051901 positive regulation of mitochondrial depolarization;GO:1904181 positive regulation of membrane depolarization		Cancer-related genes:Candidate cancer biomarkers; Disease related genes; Predicted secreted proteins; Predicted intracellular proteins			(M5882)NABA PROTEOGLYCANS; (M65)PID FRA PATHWAY; (M5884)NABA CORE MATRISOME	(M5902)HALLMARK APOPTOSIS; (M5891)HALLMARK HYPOXIA; (M5930)HALLMARK EPITHELIAL MESENCHYMAL TRANSITION	0	0	0	1	1	0	0	0	0	0	1	0	1	1	0	1	0	1	0	1	1
2932	Gsk3b	1	0	2932	Gene_ID	H. sapiens	2932	H. sapiens	GSK3B	glycogen synthase kinase 3 beta	GO:2000077 negative regulation of type B pancreatic cell development;GO:0071109 superior temporal gyrus development;GO:2000466 negative regulation of glycogen (starch) synthase activity	CMGC Ser/Thr protein kinase family	Predicted intracellular proteins; ENZYME proteins:Transferases; Kinases:CMGC Ser/Thr protein kinases; Enzymes	Nucleoplasm (reliability'])	Lithium cation; 3-[3-(2,3-Dihydroxy-Propylamino)-Phenyl]-4-(5-Fluoro-1-Methyl-1h-Indol-3-Yl)-Pyrrole-2,5-Dione; SB-409513; AR-AO-14418; Staurosporine; Indirubin-3'-monoxime; 6-bromoindirubin-3'-oxime; Alsterpaullone; Phosphoaminophosphonic Acid-Adenylate Ester; 2-(1,3-benzodioxol-5-yl)-5-[(3-fluoro-4-methoxybenzyl)sulfanyl]-1,3,4-oxadiazole; 5-[1-(4-methoxyphenyl)-1H-benzimidazol-6-yl]-1,3,4-oxad…	(M31)PID BETA CATENIN DEG PATHWAY; (M90)PID WNT CANONICAL PATHWAY; (M139)PID MYC PATHWAY	(M5923)HALLMARK PI3K AKT MTOR SIGNALING; (M5924)HALLMARK MTORC1 SIGNALING	1	1	1	0	0	0	0	1	1	0	0	1	0	0	0	1	0	0	1	0	1
25849	Parm1	1	0	25849	Gene_ID	H. sapiens	25849	H. sapiens	PARM1	prostate androgen-regulated mucin-like protein 1	GO:0051973 positive regulation of telomerase activity;GO:0051972 regulation of telomerase activity;GO:2000573 positive regulation of DNA biosynthetic process			Cytosol;Nucleoplasm;Vesicles (reliability'])		(M5880)NABA ECM AFFILIATED; (M5885)NABA MATRISOME ASSOCIATED; (M5889)NABA MATRISOME		0	0	0	0	0	0	0	0	0	0	0	0	0	0	0	0	0	0	0	0	1
5937	Rbms1	0	1	5937	Gene_ID	H. sapiens	5937	H. sapiens	RBMS1	RNA binding motif single stranded interacting protein 1	GO:0006260 DNA replication;GO:0006259 DNA metabolic process;GO:0006396 RNA processing		Predicted intracellular proteins	Cytosol (reliability'])				0	0	0	0	0	0	0	0	0	0	0	0	0	0	0	0	0	0	0	0	1
23512	Suz12	1	0	23512	Gene_ID	H. sapiens	23512	H. sapiens	SUZ12	SUZ12 polycomb repressive complex 2 subunit	GO:0070734 histone H3-K27 methylation;GO:0070317 negative regulation of G0 to G1 transition;GO:0070316 regulation of G0 to G1 transition		Disease related genes; Cancer-related genes:Mutational cancer driver genes; Predicted intracellular proteins	Nuclear bodies;Nucleoli;Nucleoplasm (reliability'])				0	0	0	0	0	0	0	0	0	0	0	0	0	0	0	0	0	0	0	0	1
64098	Parvg	1	0	64098	Gene_ID	H. sapiens	64098	H. sapiens	PARVG	parvin gamma	GO:0031532 actin cytoskeleton reorganization;GO:0034446 substrate adhesion-dependent cell spreading;GO:0007163 establishment or maintenance of cell polarity		Predicted intracellular proteins			(M71)PID ILK PATHWAY		0	0	0	0	0	0	0	1	0	0	0	0	0	0	0	0	0	0	0	0	1
79778	Micall2	0	1	79778	Gene_ID	H. sapiens	79778	H. sapiens	MICALL2	MICAL like 2	GO:1903955 positive regulation of protein targeting to mitochondrion;GO:1903214 regulation of protein targeting to mitochondrion;GO:0032456 endocytic recycling		Predicted intracellular proteins					0	1	0	0	0	0	0	1	0	0	0	0	0	0	0	0	0	0	0	0	1
23047	Pds5b	0	1	23047	Gene_ID	H. sapiens	23047	H. sapiens	PDS5B	PDS5 cohesin associated factor B	GO:0097402 neuroblast migration;GO:0007064 mitotic sister chromatid cohesion;GO:0007062 sister chromatid cohesion		Predicted intracellular proteins	Nucleoplasm (reliability'])			(M5901)HALLMARK G2M CHECKPOINT; (M5925)HALLMARK E2F TARGETS	0	0	0	0	0	0	0	0	0	0	0	0	0	0	0	0	0	0	0	0	1
595	Ccnd1	1	0	595	Gene_ID	H. sapiens	595	H. sapiens	CCND1	cyclin D1	GO:0000320 re-entry into mitotic cell cycle;GO:0070141 response to UV-A;GO:0033601 positive regulation of mammary gland epithelial cell proliferation		Predicted intracellular proteins; FDA approved drug targets:Small molecule drugs; Disease related genes; Cancer-related genes:Candidate cancer biomarkers; Cancer-related genes:Mutational cancer driver genes; Cancer-related genes:Mutated cancer genes	Nucleoplasm (reliability'])	Acetylsalicylic acid; Arsenic trioxide; Encorafenib; Bryostatin 1	(M209)PID P38 GAMMA DELTA PATHWAY; (M3686)SA REG CASCADE OF CYCLIN EXPR; (M1529)SA G1 AND S PHASES	(M5903)HALLMARK NOTCH SIGNALING; (M5908)HALLMARK ANDROGEN RESPONSE; (M5902)HALLMARK APOPTOSIS	0	0	0	0	0	0	0	0	0	1	0	0	0	0	0	0	1	0	0	1	1
80790	Cmip	0	1	80790	Gene_ID	H. sapiens	80790	H. sapiens	CMIP	c-Maf inducing protein	GO:0001701 in utero embryonic development;GO:0043009 chordate embryonic development;GO:0009792 embryo development ending in birth or egg hatching		Predicted intracellular proteins	Cytosol;Nucleoplasm (reliability'])				0	0	0	0	0	0	0	0	0	0	0	0	0	0	0	0	0	0	0	0	1
8615	Uso1	1	0	8615	Gene_ID	H. sapiens	8615	H. sapiens	USO1	USO1 vesicle transport factor	GO:0048211 Golgi vesicle docking;GO:0048280 vesicle fusion with Golgi apparatus;GO:0032252 secretory granule localization		Predicted intracellular proteins	Golgi apparatus (reliability']); Additional: Nucleoli fibrillar center		(M243)PID ARF 3PATHWAY	(M5910)HALLMARK PROTEIN SECRETION; (M5924)HALLMARK MTORC1 SIGNALING	0	0	0	0	0	0	0	0	1	0	0	0	0	0	0	0	0	0	0	0	1
51005	Amdhd2	1	0	51005	Gene_ID	H. sapiens	51005	H. sapiens	AMDHD2	amidohydrolase domain containing 2	GO:0006046 N-acetylglucosamine catabolic process;GO:0019262 N-acetylneuraminate catabolic process;GO:1901072 glucosamine-containing compound catabolic process		ENZYME proteins:Hydrolases; Predicted intracellular proteins; Enzymes	Cytosol;Nucleoli (reliability'])				0	0	0	1	0	0	0	0	0	0	0	0	0	0	0	0	0	0	0	0	1
375790	Agrn	0	1	375790	Gene_ID	H. sapiens	375790	H. sapiens	AGRN	agrin	GO:0045887 positive regulation of synaptic growth at neuromuscular junction;GO:1904398 positive regulation of neuromuscular junction development;GO:0008582 regulation of synaptic growth at neuromuscular junction		Disease related genes; Predicted secreted proteins; Predicted intracellular proteins	Cytosol;Plasma membrane (reliability'])		(M5887)NABA BASEMENT MEMBRANES; (M3008)NABA ECM GLYCOPROTEINS; (M5884)NABA CORE MATRISOME	(M5909)HALLMARK MYOGENESIS; (M5937)HALLMARK GLYCOLYSIS	0	0	0	1	0	0	0	0	1	0	0	0	1	0	0	0	0	0	0	0	1
4300	Mllt3	1	0	4300	Gene_ID	H. sapiens	4300	H. sapiens	MLLT3	MLLT3 super elongation complex subunit	GO:2000096 positive regulation of Wnt signaling pathway, planar cell polarity pathway;GO:2000035 regulation of stem cell division;GO:2000052 positive regulation of non-canonical Wnt signaling pathway		Disease related genes; Cancer-related genes:Mutational cancer driver genes; Predicted intracellular proteins	Nucleoplasm (reliability']); Additional: Cytosol				0	0	0	0	0	0	0	0	0	0	0	0	0	0	0	0	0	0	0	0	1
415116	Pim3	0	1	415116	Gene_ID	H. sapiens	415116	H. sapiens	PIM3	Pim-3 proto-oncogene, serine/threonine kinase	GO:0061179 negative regulation of insulin secretion involved in cellular response to glucose stimulus;GO:0046676 negative regulation of insulin secretion;GO:0090278 negative regulation of peptide hormone secretion	CAMK Ser/Thr protein kinase family	Predicted intracellular proteins; Cancer-related genes:Candidate cancer biomarkers; Enzymes; ENZYME proteins:Transferases; Kinases:CAMK Ser/Thr protein kinases	Cytosol (reliability'])	Fostamatinib		(M5905)HALLMARK ADIPOGENESIS	0	0	0	0	0	0	0	0	0	0	0	0	0	0	0	0	0	0	0	0	1
3956	Lgals1	1	0	3956	Gene_ID	H. sapiens	3956	H. sapiens	LGALS1	galectin 1	GO:0034117 erythrocyte aggregation;GO:0034118 regulation of erythrocyte aggregation;GO:0034120 positive regulation of erythrocyte aggregation		Predicted secreted proteins; Predicted intracellular proteins	Cytosol (reliability']); Additional: Nucleoplasm	Mercaptoethanol; Thiodigalactoside; 1,4-Dithiothreitol; Artenimol	(M269)PID RAS PATHWAY; (M254)PID MYC REPRESS PATHWAY; (M5880)NABA ECM AFFILIATED	(M5935)HALLMARK FATTY ACID METABOLISM; (M5930)HALLMARK EPITHELIAL MESENCHYMAL TRANSITION	1	0	1	0	0	0	0	0	0	1	0	0	0	0	1	0	0	1	0	1	1
5502	Ppp1r1a	1	0	5502	Gene_ID	H. sapiens	5502	H. sapiens	PPP1R1A	protein phosphatase 1 regulatory inhibitor subunit 1A	GO:0032515 negative regulation of phosphoprotein phosphatase activity;GO:0035308 negative regulation of protein dephosphorylation;GO:0005977 glycogen metabolic process		Predicted intracellular proteins					0	1	0	0	0	0	1	0	0	0	0	0	0	0	0	0	0	0	0	0	1
51105	Phf20l1	1	0	51105	Gene_ID	H. sapiens	51105	H. sapiens	PHF20L1	PHD finger protein 20 like 1	GO:0016573 histone acetylation;GO:0018393 internal peptidyl-lysine acetylation;GO:0006475 internal protein amino acid acetylation		Predicted intracellular proteins	Nucleoplasm;Plasma membrane (reliability'])				0	0	0	0	0	0	0	0	0	0	0	0	0	0	0	0	0	0	0	0	1
11343	Mgll	0	1	11343	Gene_ID	H. sapiens	11343	H. sapiens	MGLL	monoglyceride lipase	GO:2000124 regulation of endocannabinoid signaling pathway;GO:0071926 endocannabinoid signaling pathway;GO:0052651 monoacylglycerol catabolic process		ENZYME proteins:Hydrolases; Predicted intracellular proteins; Enzymes	Nucleoplasm (reliability'])			(M5942)HALLMARK UV RESPONSE DN; (M5935)HALLMARK FATTY ACID METABOLISM; (M5905)HALLMARK ADIPOGENESIS	0	1	0	0	0	0	0	0	0	0	1	0	0	0	0	0	0	0	0	0	1
10914	Papola	1	0	10914	Gene_ID	H. sapiens	10914	H. sapiens	PAPOLA	poly(A) polymerase alpha	GO:0031440 regulation of mRNA 3'-end processing;GO:0006369 termination of RNA polymerase II transcription;GO:0006378 mRNA polyadenylation		ENZYME proteins:Transferases; Predicted intracellular proteins; Enzymes	Nucleoplasm (reliability'])	Cordycepin Triphosphate; 3-sulfino-L-alanine; Triphosphoric acid			0	0	0	0	0	0	0	0	0	0	0	0	0	0	0	0	0	0	0	0	1
23199	Gse1	0	1	23199	Gene_ID	H. sapiens	23199	H. sapiens	GSE1	Gse1 coiled-coil protein			Predicted intracellular proteins	Mitochondria (reliability']); Additional: Nucleoplasm				0	0	0	0	0	0	0	0	0	0	0	0	0	0	0	0	0	0	0	0	1
6290	Saa3	0	1	6290	Gene_ID	H. sapiens	6290	H. sapiens	SAA3P	serum amyloid A3, pseudogene								0	0	0	0	0	0	0	0	0	0	0	0	0	0	0	0	0	0	0	0	1
203547	Vma21	1	0	203547	Gene_ID	H. sapiens	203547	H. sapiens	VMA21	vacuolar ATPase assembly factor VMA21	GO:0070072 vacuolar proton-transporting V-type ATPase complex assembly;GO:0070070 proton-transporting V-type ATPase complex assembly;GO:0070071 proton-transporting two-sector ATPase complex assembly		Disease related genes					0	0	0	0	0	0	1	0	0	0	0	0	0	0	0	0	0	0	0	0	1
202051	Spata24	0	1	202051	Gene_ID	H. sapiens	202051	H. sapiens	SPATA24	spermatogenesis associated 24	GO:0007283 spermatogenesis;GO:0048232 male gamete generation;GO:0007276 gamete generation		Predicted intracellular proteins	Cytosol;Nucleoplasm (reliability'])				0	0	0	0	0	0	0	0	0	0	0	0	0	0	0	0	0	0	0	0	1
9091	Gpi1	0	1	9091	Gene_ID	H. sapiens	9091	H. sapiens	PIGQ	phosphatidylinositol glycan anchor biosynthesis class Q	GO:0016254 preassembly of GPI anchor in ER membrane;GO:0006506 GPI anchor biosynthetic process;GO:0006505 GPI anchor metabolic process		ENZYME proteins:Transferases; Predicted intracellular proteins; Enzymes	Golgi apparatus;Vesicles (reliability']); Additional: Nucleoplasm			(M5945)HALLMARK HEME METABOLISM	0	0	0	1	0	0	0	0	0	0	0	0	0	0	0	0	0	0	0	0	1
9770	Rassf2	1	0	9770	Gene_ID	H. sapiens	9770	H. sapiens	RASSF2	Ras association domain family member 2	GO:0038167 epidermal growth factor receptor signaling pathway via positive regulation of NF-kappaB transcription factor activity;GO:0038168 epidermal growth factor receptor signaling pathway via I-kappaB kinase/NF-kappaB cascade;GO:0031954 positive regulation of protein autophosphorylation		Predicted intracellular proteins	Nucleoplasm (reliability']); Additional: Cytosol;Golgi apparatus;Plasma membrane				0	0	0	0	0	0	0	0	0	0	0	0	0	0	0	0	0	0	0	0	1
8446	Dusp11	0	1	8446	Gene_ID	H. sapiens	8446	H. sapiens	DUSP11	dual specificity phosphatase 11	GO:0098507 polynucleotide 5' dephosphorylation;GO:0098501 polynucleotide dephosphorylation;GO:0035335 peptidyl-tyrosine dephosphorylation		Predicted intracellular proteins	Nucleoli fibrillar center;Nucleoplasm (reliability']); Additional: Cytokinetic bridge				0	0	0	0	0	0	0	0	0	0	0	0	0	0	0	0	0	0	0	0	1
8802	Suclg1	0	1	8802	Gene_ID	H. sapiens	8802	H. sapiens	SUCLG1	succinate-CoA ligase GDP/ADP-forming subunit alpha	GO:0006099 tricarboxylic acid cycle;GO:0006101 citrate metabolic process;GO:0072350 tricarboxylic acid metabolic process		Predicted intracellular proteins; Disease related genes; ENZYME proteins:Ligase; Enzymes; Potential drug targets; Citric acid cycle related proteins	Mitochondria (reliability']); Additional: Plasma membrane			(M5935)HALLMARK FATTY ACID METABOLISM; (M5905)HALLMARK ADIPOGENESIS; (M5936)HALLMARK OXIDATIVE PHOSPHORYLATION	0	1	0	0	0	0	0	0	0	0	0	0	0	0	0	0	0	0	0	0	1
2268	Fgr	1	0	2268	Gene_ID	H. sapiens	2268	H. sapiens	FGR	FGR proto-oncogene, Src family tyrosine kinase	GO:0032815 negative regulation of natural killer cell activation;GO:0033008 positive regulation of mast cell activation involved in immune response;GO:0043306 positive regulation of mast cell degranulation	Tyr protein kinase family	Predicted intracellular proteins; Disease related genes; Enzymes; Potential drug targets; Kinases:Tyr protein kinases; ENZYME proteins:Transferases	Plasma membrane (reliability']); Additional: Aggresome	Dasatinib; Fostamatinib; Zanubrutinib	(M33)PID GLYPICAN 1PATHWAY; (M252)PID IL8 CXCR1 PATHWAY; (M76)PID P38 ALPHA BETA PATHWAY	(M5950)HALLMARK ALLOGRAFT REJECTION	1	0	1	0	0	1	0	0	0	0	0	1	0	0	1	1	0	0	1	0	1
10399	Rack1	0	1	10399	Gene_ID	H. sapiens	10399	H. sapiens	RACK1	receptor for activated C kinase 1	GO:0042998 positive regulation of Golgi to plasma membrane protein transport;GO:0051343 positive regulation of cyclic-nucleotide phosphodiesterase activity;GO:0036476 neuron death in response to hydrogen peroxide		Ribosomal proteins; Predicted intracellular proteins	Nucleoplasm;Vesicles (reliability'])	Copper	(M180)PID HIF1A PATHWAY; (M125)PID IGF1 PATHWAY; (M240)PID SYNDECAN 2 PATHWAY	(M5926)HALLMARK MYC TARGETS V1; (M5939)HALLMARK P53 PATHWAY	0	0	0	0	0	1	0	0	0	0	0	0	0	1	0	1	1	0	0	0	1
10672	Gna13	0	1	10672	Gene_ID	H. sapiens	10672	H. sapiens	GNA13	G protein subunit alpha 13	GO:0031584 activation of phospholipase D activity;GO:0001569 branching involved in blood vessel morphogenesis;GO:0010518 positive regulation of phospholipase activity		Predicted intracellular proteins; Cancer-related genes:Mutated cancer genes	Cytosol (reliability'])		(M64)PID S1P S1P4 PATHWAY; (M138)PID THROMBIN PAR4 PATHWAY; (M155)PID S1P META PATHWAY		0	0	0	0	1	0	0	0	0	0	0	0	0	0	0	0	0	0	0	1	1
23327	Nedd4l	1	0	23327	Gene_ID	H. sapiens	23327	H. sapiens	NEDD4L	NEDD4 like E3 ubiquitin protein ligase	GO:2001288 positive regulation of caveolin-mediated endocytosis;GO:2001286 regulation of caveolin-mediated endocytosis;GO:2000650 negative regulation of sodium ion transmembrane transporter activity		Predicted intracellular proteins; Disease related genes; Cancer-related genes:Mutational cancer driver genes; Enzymes; Potential drug targets; ENZYME proteins:Transferases			(M286)PID TGFBR PATHWAY; (M187)PID TRKR PATHWAY; (M19)PID P73PATHWAY	(M5891)HALLMARK HYPOXIA	0	0	0	0	0	0	1	0	0	0	0	0	0	0	0	0	1	0	0	0	1
2098	Esd	1	0	2098	Gene_ID	H. sapiens	2098	H. sapiens	ESD	esterase D	GO:0046294 formaldehyde catabolic process;GO:0046292 formaldehyde metabolic process;GO:0110095 cellular detoxification of aldehyde		ENZYME proteins:Hydrolases; Predicted intracellular proteins; Enzymes	Golgi apparatus (reliability']); Additional: Cytosol	Glutathione			0	0	0	0	0	0	0	0	0	0	0	0	0	0	0	0	0	0	0	0	1
383	Arg1	0	1	383	Gene_ID	H. sapiens	383	H. sapiens	ARG1	arginase 1	GO:0070953 regulation of neutrophil mediated killing of fungus;GO:0070965 positive regulation of neutrophil mediated killing of fungus;GO:0010963 regulation of L-arginine import		Predicted intracellular proteins; Disease related genes; ENZYME proteins:Hydrolases; Enzymes; Potential drug targets		Ornithine; 2(S)-Amino-6-Boronohexanoic Acid; nor-NOHA; Dinor-N(Omega)-Hydroxy-L-Arginine; S-{2-[Amino(Dihydroxy)-Lambda~4~-Sulfanyl]Ethyl}-D-Cysteine; N(5)-[(hydroxyamino)(imino)methyl]-L-ornithine; S-2-(Boronoethyl)-L-Cysteine; Urea; Descarboxy-nor-N(Omega)-Hydroxy-L-Arginine; S,S-(2-Hydroxyethyl)Thiocysteine; DEHYDRO-2(S)-AMINO-6-BORONOHEXANOIC ACID; S-propylamine-L-cysteine; Manganese	(M166)PID ATF2 PATHWAY; (M28)PID IL4 2PATHWAY	(M5934)HALLMARK XENOBIOTIC METABOLISM; (M5953)HALLMARK KRAS SIGNALING UP	0	0	1	0	0	0	0	0	1	1	0	1	0	1	1	1	1	0	0	1	1
6588	Sln	1	0	6588	Gene_ID	H. sapiens	6588	H. sapiens	SLN	sarcolipin	GO:1901876 regulation of calcium ion binding;GO:1901877 negative regulation of calcium ion binding;GO:0090281 negative regulation of calcium ion import		Transporters:Transporter channels and pores	Microtubules (reliability'])			(M5909)HALLMARK MYOGENESIS	0	0	0	0	0	0	1	0	0	0	0	0	0	0	0	0	0	0	0	0	1
50486	G0s2	1	0	50486	Gene_ID	H. sapiens	50486	H. sapiens	G0S2	G0/G1 switch 2	GO:2001238 positive regulation of extrinsic apoptotic signaling pathway;GO:0120162 positive regulation of cold-induced thermogenesis;GO:0106106 cold-induced thermogenesis		Predicted intracellular proteins				(M5935)HALLMARK FATTY ACID METABOLISM; (M5890)HALLMARK TNFA SIGNALING VIA NFKB; (M5953)HALLMARK KRAS SIGNALING UP	0	0	0	0	0	0	0	0	0	0	1	0	0	0	0	0	0	0	0	0	1
79156	Plekhf1	0	1	79156	Gene_ID	H. sapiens	79156	H. sapiens	PLEKHF1	pleckstrin homology and FYVE domain containing 1	GO:2001244 positive regulation of intrinsic apoptotic signaling pathway;GO:0007032 endosome organization;GO:0010508 positive regulation of autophagy		Predicted intracellular proteins					0	0	0	0	0	0	0	0	0	0	0	0	0	0	0	0	0	0	0	0	1
58504	Arhgap22	1	0	58504	Gene_ID	H. sapiens	58504	H. sapiens	ARHGAP22	Rho GTPase activating protein 22	GO:0099175 regulation of postsynapse organization;GO:0090630 activation of GTPase activity;GO:0099173 postsynapse organization		Predicted intracellular proteins	Cytosol;Nucleoplasm (reliability']); Additional: Plasma membrane				0	0	0	0	1	0	0	0	0	0	0	0	0	0	0	0	0	0	0	0	1
1947	Efnb1	1	0	1947	Gene_ID	H. sapiens	1947	H. sapiens	EFNB1	ephrin B1	GO:0031295 T cell costimulation;GO:0001755 neural crest cell migration;GO:0031294 lymphocyte costimulation		Cancer-related genes:Candidate cancer biomarkers; Disease related genes	Plasma membrane (reliability'])		(M257)PID EPHRINB REV PATHWAY; (M62)PID EPHB FWD PATHWAY		0	0	1	0	0	0	0	0	0	0	0	1	0	0	0	0	0	0	0	0	1
23373	Maml2	0	1	23373	Gene_ID	H. sapiens	23373	H. sapiens	CRTC1	CREB regulated transcription coactivator 1	GO:1902631 negative regulation of membrane hyperpolarization;GO:1902630 regulation of membrane hyperpolarization;GO:0098926 postsynaptic signal transduction		Disease related genes; Cancer-related genes:Mutational cancer driver genes; Predicted intracellular proteins	Nuclear bodies;Nucleoplasm (reliability']); Additional: Cytosol;Plasma membrane		(M167)PID AP1 PATHWAY		0	0	0	0	0	0	0	0	0	0	0	0	0	0	0	0	0	0	0	0	1
6157	Rpl27a	1	0	6157	Gene_ID	H. sapiens	6157	H. sapiens	RPL27A	ribosomal protein L27a	GO:0006614 SRP-dependent cotranslational protein targeting to membrane;GO:0006613 cotranslational protein targeting to membrane;GO:0045047 protein targeting to ER		Ribosomal proteins; Predicted intracellular proteins	Cytosol;Endoplasmic reticulum (reliability'])				0	0	0	0	0	0	0	0	0	0	0	0	0	0	0	0	0	0	0	0	1
10644	Igf2bp2	1	0	10644	Gene_ID	H. sapiens	10644	H. sapiens	IGF2BP2	insulin like growth factor 2 mRNA binding protein 2	GO:0042035 regulation of cytokine biosynthetic process;GO:0042089 cytokine biosynthetic process;GO:0042107 cytokine metabolic process		Predicted intracellular proteins	Cytosol (reliability'])				0	0	0	0	0	0	0	0	0	0	0	0	0	0	0	0	0	0	0	0	1
55850	Use1	0	1	55850	Gene_ID	H. sapiens	55850	H. sapiens	USE1	unconventional SNARE in the ER 1	GO:0006890 retrograde vesicle-mediated transport, Golgi to ER;GO:0007041 lysosomal transport;GO:0007034 vacuolar transport		Predicted intracellular proteins					0	0	0	0	0	0	0	0	0	0	0	0	0	0	0	0	0	0	0	0	1
221	Aldh3b1	1	0	221	Gene_ID	H. sapiens	221	H. sapiens	ALDH3B1	aldehyde dehydrogenase 3 family member B1	GO:0046185 aldehyde catabolic process;GO:0006068 ethanol catabolic process;GO:0034310 primary alcohol catabolic process		ENZYME proteins:Oxidoreductases; Predicted intracellular proteins; Enzymes		NADH		(M5906)HALLMARK ESTROGEN RESPONSE EARLY; (M5907)HALLMARK ESTROGEN RESPONSE LATE	1	0	0	0	0	0	0	0	0	0	1	0	0	0	0	0	0	0	0	0	1
30061	Slc40a1	0	1	30061	Gene_ID	H. sapiens	30061	H. sapiens	SLC40A1	solute carrier family 40 member 1	GO:0060345 spleen trabecula formation;GO:1903414 iron cation export;GO:1903988 ferrous iron export across plasma membrane		Potential drug targets; Disease related genes; Predicted intracellular proteins; Transporters:Electrochemical Potential-driven transporters	Plasma membrane (reliability']); Additional: Cytosol;Nucleoplasm				0	0	0	0	0	0	0	0	0	0	0	0	0	0	0	0	1	0	0	0	1
4481	Msr1	1	0	4481	Gene_ID	H. sapiens	4481	H. sapiens	MSR1	macrophage scavenger receptor 1	GO:0010886 positive regulation of cholesterol storage;GO:0010885 regulation of cholesterol storage;GO:0010744 positive regulation of macrophage derived foam cell differentiation		CD markers; Cancer-related genes:Candidate cancer biomarkers; Disease related genes; Predicted intracellular proteins				(M5932)HALLMARK INFLAMMATORY RESPONSE	0	0	0	0	0	0	0	0	0	0	0	0	0	0	0	0	0	0	0	0	1
5157	Pdgfrl	1	0	5157	Gene_ID	H. sapiens	5157	H. sapiens	PDGFRL	platelet derived growth factor receptor like	GO:0035791 platelet-derived growth factor receptor-beta signaling pathway;GO:0048008 platelet-derived growth factor receptor signaling pathway;GO:0007169 transmembrane receptor protein tyrosine kinase signaling pathway		Disease related genes; Predicted secreted proteins	Golgi apparatus;Nucleoli (reliability']); Additional: Nucleoplasm				0	0	0	0	0	0	0	0	0	0	0	0	0	0	0	0	0	0	0	0	1
[truncated: 659 more rows]

## Sheet: Enrichment
GroupID	Category	Term	Description	LogP	Log(q-value)	InTerm_InList	Genes	Symbols
[truncated: 379 more rows]
